# Supplementary material for: Box-copper catalyzed asymmetric inverse-electron-demand oxa-hetero-Diels–Alder reaction for efficient synthesis of spiro pyranyl-oxindole derivatives
Source: Royal Society of Chemistry journal article supplement (doi:10.1039/d0qo01407a), 2021-01-01
Supplement: d0qo01407a1.pdf [file d0qo01407a1.pdf]

## Supplementary Information

# Box-Copper Catalyzed Asymmetric Inverse-Electron-Demand *oxa*-Hetero-Diels–Alder Reaction for Efficient Synthesis of Spiro Pyranyl-Oxindole Derivatives

Nai-Kai Li<sup>a</sup>, Bing-Bing Sun<sup>a</sup>, Jun-Bo Chen<sup>a</sup>, Hao-Di Yang<sup>a</sup>, Bai-Lin Wang<sup>a</sup>,  
Jie-Qiang Yu<sup>a</sup>, Xing-Wang Wang<sup>\*a</sup> and Zheng Wang<sup>\*b</sup>

<sup>a</sup>Key Laboratory of Organic Synthesis of Jiangsu Province, College of Chemistry,  
Chemical Engineering and Materials Science, Soochow University, Suzhou 215123,  
the People's Republic of China

Fax: (+86)-512-6588-2916

*E-mail:* [wangxw@suda.edu.cn](mailto:wangxw@suda.edu.cn)

<sup>b</sup>State Key Laboratory of Organometallic Chemistry, Center for Excellence in  
Molecular Synthesis, Shanghai Institute of Organic Chemistry, Chinese Academy of  
Sciences, Shanghai 200032, the People's Republic of China

*Email:* [wzsioc@mail.sioc.ac.cn](mailto:wzsioc@mail.sioc.ac.cn)

|                                                                                      |           |
|--------------------------------------------------------------------------------------|-----------|
| <b>1. General methods .....</b>                                                      | <b>2</b>  |
| <b>2. Typical experimental procedure .....</b>                                       | <b>3</b>  |
| <b>3. X-ray data of chiral 3c, 4j, 9i and 12b .....</b>                              | <b>30</b> |
| <b>4. <sup>1</sup>H NMR, <sup>19</sup>F NMR and <sup>13</sup>C NMR spectra .....</b> | <b>39</b> |
| <b>5. HPLC spectra .....</b>                                                         | <b>87</b> |

## 1. General methods

All reactions were carried out under an atmosphere of nitrogen in oven-dried glasswares with magnetic stirring, unless otherwise indicated. All solvents employed in the reactions were distilled from appropriate drying agent prior to use. All other reagents were used as obtained unless otherwise noted. Flash Chromatography was performed with silica gel (300–400 mesh) from Yantai Chemical Industry Research Institute, P. R. China. Analytical thin-layer chromatography was performed with 0.2 ± 0.03 mm coated commercial silica gel plates (GF-254, particle size 0.04–0.05 mm). <sup>1</sup>H and <sup>13</sup>C NMR spectra were recorded in CDCl<sub>3</sub> or DMSO-*d*<sub>6</sub> on Varian Inova (400 MHz and 100 MHz, respectively) spectrometer. Chemical shifts (δ ppm) are relative to the resonance of the deuterated solvent as the internal standard (CDCl<sub>3</sub>, δ 7.26 ppm for proton NMR, δ 77.23 ppm for carbon NMR; DMSO-*d*<sub>6</sub>, δ 2.50 ppm for proton NMR, δ 39.52 ppm for carbon NMR). <sup>1</sup>H NMR data are reported as follows: chemical shift (δ, ppm), multiplicity (s = singlet, d = doublet, q = quartet, m = multiplet), coupling constants (J) and assignment. Data for <sup>13</sup>C NMR are reported in terms of chemical shift (δ, ppm). IR spectra were recorded on a Varian 1000 FT-IR spectrometer. Mass spectra were carried out using Agilent 6120 Quadrupole LC/MS system with ESI resource. High-resolution mass spectra (HRMS) for all the compounds were determined on Micromass GCT-TOF mass spectrometer with ESI resource. High performance liquid chromatography (HPLC) was performed on an Agilent 1200 Series chromatographs using CHIRALCEL AD-H and OD-H columns. X-ray data were recorded on a Rigaku Mercury CCD/AFC diffractometer. Optical rotations are performed on Rudolph Aupol IV and reported as follows: [ $\alpha$ ]<sub>D</sub><sup>25</sup> (c in g per 100 mL, solvent).

## 2. Typical experimental procedure

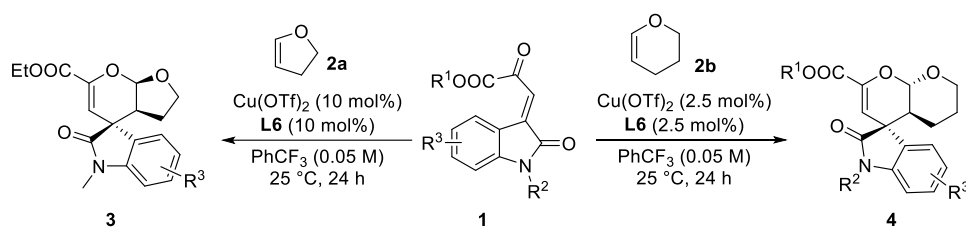

### 2.1 General procedure for the preparation of **3** and **4**

Under  $\text{N}_2$  atmosphere,  $\text{Cu}(\text{OTf})_2$  (0.0025–0.01 mmol, 2.5–10 mol%) and **L6** (0.0025–0.01 mmol, 2.5–10 mol%) were charged into a flame-dried vessel, and anhydrous  $\text{PhCF}_3$  (2 mL) was added *via* syringe. The resulting mixture was stirred at room temperature for 0.5 h. Then the substrates **1** (0.1 mmol) and **2a** or **2b** (0.2 mmol, 2 equiv) was introduced into the vessel. The reaction mixture was stirred at 25 °C until the reaction was detected complete. The solvent was removed under reduced pressure, and the resulting residue was purified by column chromatography on silica gel with petroleum ether/EtOAc (3/1) as eluent to give **3** or **4** as solids. All the products described in this manuscript were obtained as a mixture all diastereomers.

The racemic samples described in this work were synthesized according above procedure, which were catalyzed by  $\text{Cu}(\text{OTf})_2$  with mixed **L6** and *ent*-**L6** as ligands at 0.025 mmol scale. Because equal amount of **L6** and *ent*-**L6** could not be accurately balanced, slight *ee* values (<10%) were observed in their racemic HPLC spectra.

#### Ethyl-(3*S*,4*a'**S*,8*a'**S*)-1-methyl-2-oxo-4*a'*,6',7',8*a'*-tetrahydro-5'*H*-spiro[indoline-3,4'-pyrano[2,3-*b*]pyran]-2'-carboxylate **4a**

White solid; mp 160–161 °C; 94% yield (both diastereomers) >99:1 *dr*, 94% *ee* [Daicel Chiralcel AD-H, hexanes/*i*-PrOH = 80/20, flow rate: 1.0 mL min<sup>-1</sup>,  $\lambda = 254.4$  nm, *t* (major) = 12.087, *t* (minor) = 15.133];  $[\alpha]_{\text{D}}^{25} = +148.9$  (*c* 0.14,  $\text{CHCl}_3$ ); <sup>1</sup>H NMR (400 MHz,  $\text{CDCl}_3$ )  $\delta$  7.31 (td, *J* = 7.6, 1.7 Hz, 1H), 7.16 – 7.02 (m, 2H), 6.84 (d, *J* = 7.8 Hz, 1H), 5.67 (s, 1H), 5.60 (d, *J* = 8.9 Hz, 1H), 4.23 (qq, *J* = 7.5, 3.7 Hz, 2H), 4.13 – 4.00 (m, 1H), 3.63 (td, *J* = 12.0, 2.5 Hz,

**4a**

1H), 3.20 (s, 3H), 1.94 (ddd,  $J = 12.7, 8.9, 4.2$  Hz, 1H), 1.65 – 1.38 (m, 2H), 1.36 – 1.15 (m, 5H);  $^{13}\text{C}$  NMR (100 MHz,  $\text{CDCl}_3$ )  $\delta$  175.3, 161.2, 144.1, 143.3, 129.2, 128.6, 122.8, 122.7, 108.3, 107.7, 97.5, 66.3, 61.0, 50.5, 41.7, 26.0, 24.7, 21.7, 13.7; IR (KBr)  $\nu_{\text{max}}$ : 2947, 2925, 2871, 1719, 1700, 1649, 1608, 1493, 1471, 1370, 1345, 1303, 1275, 1260, 1223, 1176, 1136, 1080, 1057, 1016, 991, 926, 841, 765, 751, 671, 650  $\text{cm}^{-1}$ ; HRMS (ESI):  $m/z = 366.1310$  (calcd for  $\text{C}_{19}\text{H}_{21}\text{NO}_5 + \text{Na}^+ = 366.1312$ ).

**Ethyl-(3*S*,4*a'**S*,8*a'**S*)-1-methyl-2-oxo-4*a'*,6',7',8*a'*-tetrahydro-5'H-spiro[indoline-3,4'-pyrano[2,3-b]pyran]-2'-carboxylate 4b**

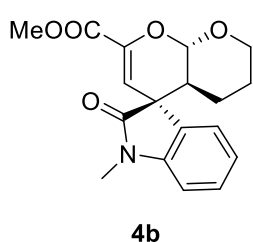

White solid; mp 140–141 °C; 76% yield (both diastereomers), 96:4 *dr*, 94% *ee* [Daicel Chiralcel AD-H, hexanes/*i*-PrOH = 80/20, flow rate: 1.0 mL  $\text{min}^{-1}$ ,  $\lambda = 254.4$  nm,  $t$  (major) = 13.307,  $t$  (minor) = 18.928];  $[\alpha]_{\text{D}}^{25} = +191.7$  ( $c$  0.1,  $\text{CHCl}_3$ );  $^1\text{H}$  NMR (400 MHz,  $\text{CDCl}_3$ )  $\delta$  7.33 (td,  $J = 7.5, 1.8$  Hz, 1H), 7.16 – 7.06 (m, 2H), 6.85 (d,  $J = 7.8$  Hz, 1H), 5.70 (s, 1H), 5.63 (d,  $J = 8.9$  Hz, 1H), 4.09 (dd,  $J = 11.8, 4.6$  Hz, 1H), 3.80 (s, 3H), 3.65 (td,  $J = 12.0, 2.5$  Hz, 1H), 3.22 (s, 3H), 1.96 (ddd,  $J = 12.8, 8.9, 4.2$  Hz, 1H), 1.48 (d,  $J = 13.7$  Hz, 2H), 1.37 – 1.26 (m, 2H);  $^{13}\text{C}$  NMR (101 MHz,  $\text{CDCl}_3$ )  $\delta$  175.3, 161.8, 143.9, 143.3, 128.6, 122.8, 121.4, 119.3, 108.6, 107.7, 97.5, 66.3, 51.9, 50.5, 41.7, 26.0, 24.7, 21.7; IR (KBr)  $\nu_{\text{max}}$ : 2932, 2867, 1729, 1709, 1639, 1611, 1494, 1371, 1349, 1304, 1282, 1222, 1198, 1169, 1130, 1087, 1024, 991, 956, 883, 763, 673, 653  $\text{cm}^{-1}$ ; HRMS (ESI):  $m/z = 352.1145$  (calcd for  $\text{C}_{18}\text{H}_{19}\text{NO}_5 + \text{Na}^+ = 352.1155$ ).

**Ethyl-(3*S*,4*a'**S*,8*a'**S*)-1-(methoxymethyl)-2-oxo-4*a'*,6',7',8*a'*-tetrahydro-5'H-spiro[indoline-3,4'-pyrano[2,3-b]pyran]-2'-carboxylate 4b**

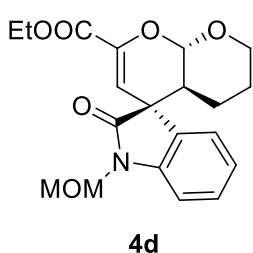

White solid; mp 63–64 °C; 93% yield (both diastereomers), >99:1 *dr*, 93% *ee* [Daicel Chiralcel AD-H, hexanes/*i*-PrOH = 80/20, flow rate: 1.0 mL  $\text{min}^{-1}$ ,  $\lambda = 254.4$  nm,  $t$  (major) = 10.943,  $t$  (minor) = 12.549];  $[\alpha]_{\text{D}}^{25} = +185$  ( $c$  0.16,  $\text{CHCl}_3$ );  $^1\text{H}$  NMR (400 MHz,  $\text{CDCl}_3$ )  $\delta$  7.31 (s, 1H), 7.18 – 7.08 (m, 2H), 7.04 (d,  $J = 7.9$  Hz, 1H), 5.69 (d,  $J = 1.6$  Hz, 1H), 5.59 (dd,  $J = 9.0, 1.6$  Hz, 1H), 5.21 – 4.99 (m, 2H), 4.25 (qq,  $J = 7.2, 2.6, 2.1$  Hz, 2H), 4.14 – 3.99 (m, 1H),

3.65 (tt,  $J = 12.1, 2.1$  Hz, 1H), 3.33 (s, 3H), 2.04 – 1.93 (m, 1H), 1.65 – 1.36 (m, 3H), 1.34 – 1.23 (m, 4H);  $^{13}\text{C}$  NMR (101 MHz,  $\text{CDCl}_3$ )  $\delta$  176.0, 161.2, 144.2, 141.6, 128.7, 128.7, 123.4, 122.9, 109.3, 108.2, 97.5, 71.3, 66.4, 61.2, 56.0, 50.9, 41.6, 24.7, 21.9, 13.7; IR (KBr)  $\nu_{\text{max}}$ : 2935, 2864, 1716, 1643, 1610, 1487, 1466, 1342, 1321, 1296, 1276, 1242, 1175, 1113, 1083, 1055, 1017, 991, 914, 754, 663, 618  $\text{cm}^{-1}$ ; HRMS (ESI):  $m/z = 396.1404$  (calcd for  $\text{C}_{20}\text{H}_{23}\text{NO}_6 + \text{Na}^+ = 396.1418$ ).

**Ethyl-(3*S*,4*a'**S*,8*a'**S*)-1-allyl-2-oxo-4*a'*,6',7',8*a'*-tetrahydro-5'H-spiro[indoline-3,4'-pyrano[2,3-b]pyran]-2'-carboxylate **4e****

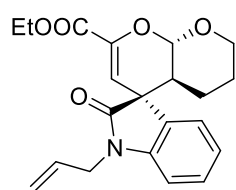

**4e**

White solid; mp 37–38 °C; 88% yield (both diastereomers), 99:1 *dr*, 92% *ee* [Daicel Chiralcel AD-H, hexanes/*i*-PrOH = 80/20, flow rate: 1.0 mL  $\text{min}^{-1}$ ,  $\lambda = 254.4$  nm,  $t$  (major) = 11.027,  $t$  (minor) = 13.066];  $[\alpha]_{\text{D}}^{25} = +149.7$  ( $c$  0.18,  $\text{CHCl}_3$ );  $^1\text{H}$  NMR (400 MHz,  $\text{CDCl}_3$ )  $\delta$  7.29 (dd,  $J = 7.6, 1.5$  Hz, 1H), 7.18 – 7.04 (m, 2H), 6.84 (d,  $J = 7.8$  Hz, 1H), 5.82 (ddt,  $J = 16.1, 10.4, 5.3$  Hz, 1H), 5.69 (s, 1H), 5.62 (d,  $J = 8.9$  Hz, 1H), 5.30 – 5.14 (m, 2H), 4.43 (ddd,  $J = 16.1, 5.1, 2.3$  Hz, 1H), 4.25 (qq,  $J = 6.2, 3.6$  Hz, 3H), 4.09 (dd,  $J = 11.8, 4.5$  Hz, 1H), 3.65 (td,  $J = 12.0, 2.6$  Hz, 1H), 1.97 (ddd,  $J = 12.7, 8.9, 4.2$  Hz, 1H), 1.60 (tdt,  $J = 12.4, 8.8, 4.5$  Hz, 1H), 1.54 – 1.44 (m, 1H), 1.38 – 1.22 (m, 5H);  $^{13}\text{C}$  NMR (101 MHz,  $\text{CDCl}_3$ )  $\delta$  175.0, 161.3, 144.2, 142.5, 130.5, 129.2, 128.5, 122.8, 122.8, 117.3, 108.7, 108.3, 97.5, 66.3, 61.1, 50.5, 42.2, 41.7, 24.7, 21.8, 13.7; IR (KBr)  $\nu_{\text{max}}$ : 2936, 2864, 2361, 2341, 1710, 1644, 1610, 1487, 1465, 1353, 1321, 1302, 1275, 1225, 1175, 1083, 1018, 992, 917, 753, 668  $\text{cm}^{-1}$ ; HRMS (ESI):  $m/z = 392.1477$  (calcd for  $\text{C}_{21}\text{H}_{23}\text{NO}_5 + \text{Na}^+ = 392.1468$ ).

**Ethyl-(3*S*,4*a'**S*,8*a'**S*)-1-benzyl-2-oxo-4*a'*,6',7',8*a'*-tetrahydro-5'H-spiro[indoline-3,4'-pyrano[2,3-b]pyran]-2'-carboxylate **4f****

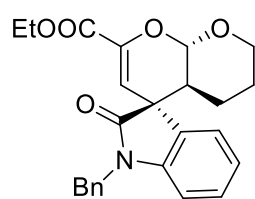

**4f**

White solid; mp 156–157 °C; 86% yield (both diastereomers), 98:2 *dr*, 92% *ee* [Daicel Chiralcel AD-H, hexanes/*i*-PrOH = 80/20, flow rate: 1.0 mL  $\text{min}^{-1}$ ,  $\lambda = 254.4$  nm,  $t$  (major) = 13.721,  $t$  (minor) = 19.254];  $[\alpha]_{\text{D}}^{25} = +152.5$  ( $c$  0.22,  $\text{CHCl}_3$ );  $^1\text{H}$  NMR (400 MHz,  $\text{CDCl}_3$ )  $\delta$  7.36 – 7.26 (m, 5H), 7.21 (td,  $J = 7.7, 1.4$  Hz, 1H), 7.14 (dd,  $J = 7.5, 1.3$  Hz, 1H), 7.06 (t,  $J = 7.5$  Hz, 1H), 6.75 (d,  $J = 7.8$  Hz,

1H), 5.73 (s, 1H), 5.67 (d,  $J = 8.9$  Hz, 1H), 5.06 – 4.78 (m, 2H), 4.27 (qd,  $J = 7.2, 2.0$  Hz, 2H), 4.11 (dd,  $J = 11.9, 4.5$  Hz, 1H), 3.68 (td,  $J = 12.0, 2.5$  Hz, 1H), 2.01 (ddd,  $J = 11.8, 8.9, 4.3$  Hz, 1H), 1.66 – 1.55 (m, 1H), 1.55 – 1.46 (m, 1H), 1.38 (ddd,  $J = 15.9, 11.5, 6.2$  Hz, 2H), 1.30 (t,  $J = 7.1$  Hz, 3H);  $^{13}\text{C}$  NMR (101 MHz,  $\text{CDCl}_3$ )  $\delta$  175.5, 161.3, 144.2, 142.5, 135.0, 129.36, 128.5, 128.4, 127.3, 126.8, 122.9, 108.8, 108.4, 97.6, 66.4, 61.1, 50.5, 43.8, 41.8, 24.8, 21.9, 13.7; IR (KBr)  $\nu_{\text{max}}$ : 2928, 2868, 2851, 1709, 1648, 1611, 1467, 1351, 1320, 1276, 1228, 1220, 1177, 1077, 1038, 983, 754, 741, 697, 658  $\text{cm}^{-1}$ ; HRMS (ESI):  $m/z = 442.1635$  (calcd for  $\text{C}_{25}\text{H}_{25}\text{NO}_5 + \text{Na}^+ = 442.1625$ ).

**Ethyl-(3*S*,4*a*'*S*,8*a*'*S*)-1-acetyl-2-oxo-4*a*',6',7',8*a*'-tetrahydro-5'H-spiro[indoline-3,4'-pyrano[2,3-*b*]pyran]-2'-carboxylate 4g**

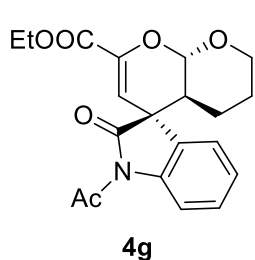

White solid; mp 123–124 °C; 63% yield (both diastereomers), 94:6 *dr*, 96% *ee* [Daicel Chiralcel AD-H, hexanes/*i*-PrOH = 80/20, flow rate: 1.0 mL  $\text{min}^{-1}$ ,  $\lambda = 254.4$  nm,  $t$  (major) = 11.168,  $t$  (minor) = 16.163];  $[\alpha]_{\text{D}}^{25} = +127.3$  ( $c$  0.06,  $\text{CHCl}_3$ );  $^1\text{H}$  NMR (400 MHz,  $\text{CDCl}_3$ )  $\delta$  8.22 (d,  $J = 8.2$  Hz, 1H), 7.42 – 7.32 (m, 1H), 7.28 – 7.23 (m, 1H), 7.16 (dd,  $J = 7.5, 1.4$  Hz, 1H), 5.73 (s, 1H), 5.53 (d,  $J = 9.0$  Hz, 1H), 4.27 (pd,  $J = 7.2, 4.1$  Hz, 3H), 3.66 (td,  $J = 12.0, 2.7$  Hz, 1H), 2.68 (s, 3H), 1.96 (ddd,  $J = 12.7, 8.9, 3.9$  Hz, 1H), 1.51 (dd,  $J = 13.8, 9.0$  Hz, 3H), 1.34 – 1.28 (m, 4H);  $^{13}\text{C}$  NMR (101 MHz,  $\text{CDCl}_3$ )  $\delta$  176.6, 170.1, 161.0, 144.4, 139.7, 128.9, 128.3, 125.5, 122.5, 116.2, 107.5, 97.4, 66.4, 61.3, 51.0, 42.6, 26.3, 24.7, 21.8, 13.7; IR (KBr)  $\nu_{\text{max}}$ : 2920, 2850, 2360, 2341, 1748, 1716, 1651, 1462, 1372, 1334, 1299, 1260, 1238, 1199, 1163, 1132, 1115, 1085, 1054, 1032, 1016, 994, 904, 862, 766, 757  $\text{cm}^{-1}$ ; HRMS (ESI):  $m/z = 394.1266$  (calcd for  $\text{C}_{20}\text{H}_{21}\text{NO}_6 + \text{Na}^+ = 394.1261$ ).

**Ethyl-(3*S*,4*a*'*S*,8*a*'*S*)-5-fluoro-1-methyl-2-oxo-4*a*',6',7',8*a*'-tetrahydro-5'H-spiro[indoline-3,4'-pyrano[2,3-*b*]pyran]-2'-carboxylate 4h**

White solid; mp 132–133 °C; 93% yield (both diastereomers), 99:1 *dr*, 94% *ee* [Daicel Chiralcel AD-H, hexanes/*i*-PrOH = 80/20, flow rate: 1.0 mL  $\text{min}^{-1}$ ,  $\lambda = 254.4$  nm,  $t$  (major) = 10.926,  $t$  (minor) = 13.741];  $[\alpha]_{\text{D}}^{25} = +167.8$  ( $c$  0.09,  $\text{CHCl}_3$ );  $^1\text{H}$  NMR (400 MHz,  $\text{CDCl}_3$ )  $\delta$  7.02 (td,  $J = 8.8, 2.5$  Hz, 1H), 6.88 (dd,  $J = 7.7, 2.5$  Hz, 1H),

6.78 (dd,  $J = 8.5, 4.0$  Hz, 1H), 5.65 (s, 1H), 5.60 (d,  $J = 8.9$  Hz, 1H), 4.25 (dtd,  $J = 8.4,$

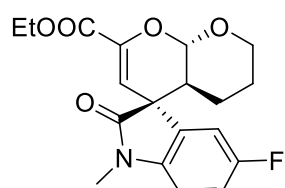

**4h**

7.0, 6.4, 3.7 Hz, 2H), 4.09 (dt,  $J = 12.1, 3.0$  Hz, 1H), 3.64 (td,  $J = 12.2, 2.4$  Hz, 1H), 3.20 (s, 3H), 1.90 (ddd,  $J = 12.8, 8.8, 4.2$  Hz, 1H), 1.66 – 1.55 (m, 1H), 1.52 – 1.44 (m, 1H), 1.33 – 1.23 (m, 5H);  $^{19}\text{F}$  NMR (376 MHz,  $\text{CDCl}_3$ )  $\delta -119.1$ ;

$^{13}\text{C}$  NMR (101 MHz,  $\text{CDCl}_3$ )  $\delta$  175.0, 161.1, 159.1 (d,  $J = 240.0$  Hz), 144.4, 139.2, 130.9 (d,  $J = 8.0$  Hz), 114.8 (d,  $J = 23.0$  Hz), 111.1 (d,  $J = 76.0$  Hz), 108.3 (d,  $J = 8.0$  Hz), 107.5, 97.4, 66.3, 61.2, 50.9, 41.6, 26.2, 24.6, 21.7, 13.7; IR (KBr)  $\nu_{\text{max}}$ : 2859, 1712, 1645, 1618, 1489, 1450, 1277, 1261, 1227, 1093, 1080, 994, 880, 811, 670  $\text{cm}^{-1}$ ; HRMS (ESI):  $m/z = 384.1228$  (calcd for  $\text{C}_{19}\text{H}_{20}\text{FNO}_5 + \text{Na}^+ = 384.1218$ ).

**Ethyl-(3S,4a'S,8a'S)-5-chloro-1-methyl-2-oxo-4a',6',7',8a'-tetrahydro-5'H-spiro[indoline-3,4'-pyrano[2,3-b]pyran]-2'-carboxylate **4i****

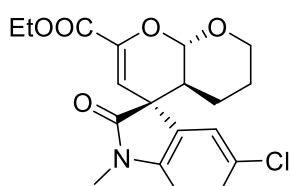

**4i**

White solid; mp 162–163 °C; 93% yield (both diastereomers), 99:1 *dr*, 99% *ee* [Daicel Chiralcel AD-H, hexanes/*i*-PrOH = 80/20, flow rate: 1.0 mL  $\text{min}^{-1}$ ,  $\lambda = 254.4$  nm,  $t$  (major) = 10.250,  $t$  (minor) = 14.271];  $[\alpha]_{\text{D}}^{25} = +187.1$  ( $c$  0.07,  $\text{CHCl}_3$ );  $^1\text{H}$  NMR (400 MHz,  $\text{CDCl}_3$ )  $\delta$  7.30 (dd,  $J =$

8.4, 1.9 Hz, 1H), 7.11 (d,  $J = 2.0$  Hz, 1H), 6.78 (dd,  $J = 8.3, 1.6$  Hz, 1H), 5.65 (d,  $J = 1.6$  Hz, 1H), 5.63 – 5.57 (m, 1H), 4.34 – 4.17 (m, 2H), 4.10 (dd,  $J = 12.9, 4.1$  Hz, 1H), 3.65 (t,  $J = 12.0$  Hz, 1H), 3.21 (s, 3H), 2.01 – 1.84 (m, 1H), 1.49 (d,  $J = 13.8$  Hz, 1H), 1.38 – 1.18 (m, 6H);  $^{13}\text{C}$  NMR (101 MHz,  $\text{CDCl}_3$ )  $\delta$  174.9, 161.1, 144.5, 141.9, 131.0, 128.5, 128.2, 123.4, 108.7, 107.3, 97.4, 66.3, 61.2, 50.7, 41.6, 26.2, 24.6, 21.7, 13.7; IR (KBr)  $\nu_{\text{max}}$ : 2968, 2942, 2860, 1715, 1651, 1608, 1488, 1381, 1365, 1322, 1304, 1287, 1273, 1220, 1081, 1057, 1024, 993, 849, 817, 774, 666  $\text{cm}^{-1}$ ; HRMS (ESI):  $m/z = 400.0930$  (calcd for  $\text{C}_{19}\text{H}_{20}\text{ClNO}_5 + \text{Na}^+ = 400.0922$ ).

**Ethyl-(3S,4a'S,8a'S)-5-bromo-1-methyl-2-oxo-4a',6',7',8a'-tetrahydro-5'H-spiro[indoline-3,4'-pyrano[2,3-b]pyran]-2'-carboxylate **4j****

White solid; mp 181–182 °C; 95% yield (both diastereomers), >99:1 *dr*, 99% *ee* [Daicel Chiralcel AD-H, hexanes/*i*-PrOH = 80/20, flow rate: 1.0 mL  $\text{min}^{-1}$ ,  $\lambda = 254.4$

nm, t (major) = 10.738, t (minor) = 13.323];  $[\alpha]_{\text{D}}^{25} = +177.8$  (c 0.14,  $\text{CHCl}_3$ );  $^1\text{H}$  NMR (400 MHz,  $\text{CDCl}_3$ )  $\delta$  7.45 (dd,  $J = 8.2, 2.0$  Hz, 1H), 7.24 (d,  $J = 2.0$  Hz, 1H), 6.73 (d,

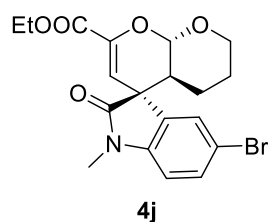

$J = 8.3$  Hz, 1H), 5.64 (s, 1H), 5.59 (d,  $J = 8.9$  Hz, 1H), 4.26 (qd,  $J = 7.2, 4.3$  Hz, 2H), 4.15 – 4.03 (m, 1H), 3.64 (td,  $J = 12.1, 2.5$  Hz, 1H), 3.20 (s, 3H), 1.91 (ddd,  $J = 12.7, 8.9, 4.1$  Hz, 1H), 1.60 (ddt,  $J = 12.6, 8.8, 4.4$  Hz, 1H), 1.53 – 1.44 (m, 1H), 1.36 – 1.23 (m, 5H);  $^{13}\text{C}$  NMR (101 MHz,  $\text{CDCl}_3$ )  $\delta$  174.8, 161.1,

144.5, 142.4, 131.4, 131.3, 126.1, 115.4, 109.2, 107.3, 97.4, 66.3, 61.2, 50.6, 41.6, 26.1, 24.6, 21.7, 13.7; IR (KBr)  $\nu_{\text{max}}$ : 2969, 2940, 2855, 1713, 1651, 1606, 1493, 1485, 1322, 1304, 1286, 1273, 1261, 1219, 1082, 1057, 1024, 993, 847, 814, 773, 664  $\text{cm}^{-1}$ ; HRMS (ESI):  $m/z = 446.0413$  (calcd for  $\text{C}_{19}\text{H}_{20}\text{BrNO}_5 + \text{Na}^+ = 444.0417$ ).

**Ethyl-(3S,4a'S,8a'S)-5-methoxy-1-methyl-2-oxo-4a',6',7',8a'-tetrahydro-5'H-spiro[indoline-3,4'-pyrano[2,3-b]pyran]-2'-carboxylate 4k**

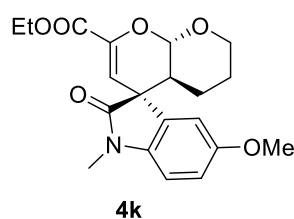

White solid; mp 190–191 °C; 94% yield (both diastereomers), >99:1 *dr*, 98% *ee* [Daicel Chiralcel AD-H, hexanes/*i*-PrOH = 80/20, flow rate: 1.0 mL  $\text{min}^{-1}$ ,  $\lambda = 254.4$  nm, t (major) = 14.524, t (minor) = 16.544];  $[\alpha]_{\text{D}}^{25} = +154.0$

(c 0.20,  $\text{CHCl}_3$ );  $^1\text{H}$  NMR (400 MHz,  $\text{CDCl}_3$ )  $\delta$  6.83 (dd,  $J = 8.5, 2.5$  Hz, 1H), 6.76 (s, 1H), 6.74 – 6.71 (m, 1H), 5.68 (s, 1H), 5.60 (d,  $J = 8.9$  Hz, 1H), 4.24 (qq,  $J = 7.4, 3.8$  Hz, 2H), 4.12 – 4.03 (m, 1H), 3.78 (s, 3H), 3.64 (td,  $J = 12.0, 2.5$  Hz, 1H), 3.18 (s, 3H), 1.91 (ddd,  $J = 12.7, 8.9, 4.2$  Hz, 1H), 1.58 (tq,  $J = 12.4, 4.2$  Hz, 1H), 1.51 – 1.42 (m, 1H), 1.34 – 1.24 (m, 5H);  $^{13}\text{C}$  NMR (101 MHz,  $\text{CDCl}_3$ )  $\delta$  175.0, 161.3, 156.0, 144.1, 136.7, 130.6, 112.8, 110.0, 108.3, 108.1, 97.5, 66.3, 61.1, 55.3, 50.9, 41.8, 26.1, 24.7, 21.7, 13.7; IR (KBr)  $\nu_{\text{max}}$ : 2966, 2926, 2871, 1708, 1644, 1598, 1493, 1464, 1440, 1357, 1318, 1289, 1276, 1259, 1230, 1204, 1174, 1139, 1116, 1083, 1057, 1020, 996, 839, 802, 774, 666  $\text{cm}^{-1}$ ; HRMS (ESI):  $m/z = 396.1426$  (calcd for  $\text{C}_{20}\text{H}_{23}\text{NO}_6 + \text{Na}^+ = 396.1418$ ).

**Ethyl-(3S,4a'S,8a'S)-1,5,7-trimethyl-2-oxo-4a',6',7',8a'-tetrahydro-5'H-spiro[indoline-3,4'-pyrano[2,3-b]pyran]-2'-carboxylate 4l**



White solid; mp 158–159 °C; 83% yield (both diastereomers), 97:3 *dr*, 97% *ee* [Daicel Chiralcel AD-H, hexanes/*i*-PrOH = 80/20, flow rate: 1.0 mL min<sup>-1</sup>, λ = 254.4

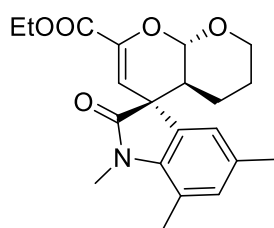

**4i**

nm, *t* (major) = 9.212, *t* (minor) = 10.499]; [α]<sub>D</sub><sup>25</sup> = +180.7 (*c* 0.14, CHCl<sub>3</sub>); <sup>1</sup>H NMR (400 MHz, CDCl<sub>3</sub>) δ 6.84 (s, 1H), 6.75 (d, *J* = 1.7 Hz, 1H), 5.66 (s, 1H), 5.61 (d, *J* = 8.9 Hz, 1H), 4.24 (qd, *J* = 7.1, 4.8 Hz, 2H), 4.08 (ddd, *J* = 9.9, 4.5, 2.3 Hz, 1H), 3.64 (td, *J* = 12.0, 2.5 Hz, 1H), 3.46 (s, 3H), 2.52 (s, 3H), 2.26 (s, 3H), 1.88 (ddd, *J* = 12.7, 8.9, 4.1 Hz, 1H), 1.61 – 1.46 (m, 2H), 1.36 – 1.23 (m, 5H); <sup>13</sup>C NMR (101 MHz, CDCl<sub>3</sub>) δ 175.9, 161.4, 143.9, 138.6, 132.6, 132.3, 129.9, 121.4, 119.0, 108.9, 97.6, 66.3, 61.0, 50.0, 42.0, 29.3, 24.7, 21.7, 20.3, 18.3, 13.7; IR (KBr) *v*<sub>max</sub>: 2921, 2857, 1721, 1700, 1633, 1602, 1474, 1343, 1306, 1262, 1177, 1135, 1110, 1084, 1067, 1042, 1019, 996, 958, 850, 778, 747, 677 cm<sup>-1</sup>; HRMS (ESI): *m/z* = 394.1619 (calcd for C<sub>21</sub>H<sub>25</sub>NO<sub>5</sub>+Na<sup>+</sup> = 394.1625).

**Ethyl-(3*S*,4*a'**S*,8*a'**S*)-6-chloro-1-methyl-2-oxo-4*a'*,6',7',8*a'*-tetrahydro-5'H-spiro [indoline-3,4'-pyrano[2,3-*b*]pyran]-2'-carboxylate **4m****

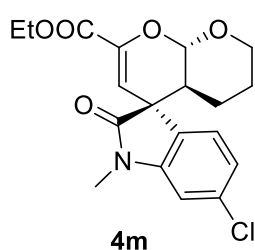

**4m**

White solid; mp 181–182 °C; 92% yield (both diastereomers), >99:1 *dr*, 93% *ee* [Daicel Chiralcel AD-H, hexanes/*i*-PrOH = 80/20, flow rate: 1.0 mL min<sup>-1</sup>, λ = 254.4 nm, *t* (major) = 12.572, *t* (minor) = 21.554]; [α]<sub>D</sub><sup>25</sup> = +102.8 (*c* 0.11, CHCl<sub>3</sub>); <sup>1</sup>H NMR (400 MHz, CDCl<sub>3</sub>) δ 7.13 – 6.98 (m, 2H), 6.85 (d, *J* = 1.7 Hz, 1H), 5.63 (s, 1H), 5.59 (d, *J* = 8.9 Hz, 1H), 4.25 (qq, *J* = 7.2, 3.8 Hz, 2H), 4.08 (dd, *J* = 11.8, 4.5 Hz, 1H), 3.63 (td, *J* = 12.0, 2.6 Hz, 1H), 3.20 (s, 3H), 1.91 (ddd, *J* = 12.7, 8.9, 4.1 Hz, 1H), 1.64 – 1.42 (m, 2H), 1.38 – 1.15 (m, 5H); <sup>13</sup>C NMR (101 MHz, CDCl<sub>3</sub>) δ 175.3, 161.1, 144.5, 144.4, 134.4, 127.6, 123.7, 122.7, 108.5, 107.6, 97.4, 66.3, 61.2, 50.3, 41.6, 26.1, 24.6, 21.7, 13.7; IR (KBr) *v*<sub>max</sub>: 2931, 2855, 1724, 1711, 1637, 1607, 1366, 1278, 1252, 1174, 1132, 1087, 1068, 1056, 1021, 1005, 993, 925, 841, 776, 764, 665 cm<sup>-1</sup>; HRMS (ESI): *m/z* = 400.0930 (calcd for C<sub>19</sub>H<sub>20</sub>ClNO<sub>5</sub>+Na<sup>+</sup> = 400.0922).

**Ethyl-(3*S*,4*a'**S*,8*a'**S*)-7-fluoro-1-methyl-2-oxo-4*a'*,6',7',8*a'*-tetrahydro-5'H-spiro [indoline-3,4'-pyrano[2,3-*b*]pyran]-2'-carboxylate **4n****

White solid; mp 104–105 °C; 90% yield (both diastereomers), 98:2 *dr*, 92% *ee* [Daicel Chiralcel AD-H, hexanes/*i*-PrOH = 80/20, flow rate: 1.0 mL min<sup>-1</sup>, λ = 254.4

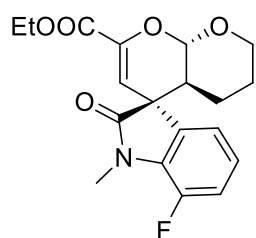

**4n**

nm, t (major) = 12.046, t (minor) = 17.247]; [α]<sub>D</sub><sup>25</sup> = +162.0 (*c* 0.10, CHCl<sub>3</sub>); <sup>1</sup>H NMR (400 MHz, CDCl<sub>3</sub>) δ 7.11 – 6.99 (m, 2H), 6.91 (dd, *J* = 6.2, 2.1 Hz, 1H), 5.66 (s, 1H), 5.60 (d, *J* = 8.9 Hz, 1H), 4.26 (qq, *J* = 7.5, 3.6 Hz, 2H), 4.13 – 4.00 (m, 1H), 3.65 (td, *J* = 12.0, 2.6 Hz, 1H), 3.42 (s, 3H), 1.92 (ddd, *J* = 12.7, 8.8, 4.1 Hz, 1H), 1.59 (ddt, *J* = 12.5, 8.0, 4.4 Hz, 1H), 1.53 – 1.46 (m, 1H), 1.38 – 1.23 (m, 5H); <sup>19</sup>F NMR (376 MHz, CDCl<sub>3</sub>) δ –136.2; <sup>13</sup>C NMR (101 MHz, CDCl<sub>3</sub>) δ 175.0, 161.2, 148.2, 144.3, 132.1, 130.0, 123.4 (d, *J* = 6.0 Hz), 118.6, 116.5 (d, *J* = 18.0 Hz), 107.7, 97.3, 66.3, 61.2, 50.8, 41.8, 28.5, 24.6, 21.7, 13.7; IR (KBr) ν<sub>max</sub>: 2923, 2857, 1712, 1656, 1627, 1483, 1371, 1322, 1301, 1277, 1236, 1138, 1110, 1083, 1061, 1053, 1026, 992, 983, 865, 789, 770, 756, 736, 678 cm<sup>-1</sup>; HRMS (ESI): *m/z* = 384.1224 (calcd for C<sub>19</sub>H<sub>20</sub>FNO<sub>5</sub>+Na<sup>+</sup> = 384.1218).

**Ethyl-(3*S*,4*a'**S*,8*a'**S*)-1,7-dimethyl-2-oxo-4*a'*,6',7',8*a'*-tetrahydro-5'*H*-spiro [indoline-3,4'-pyrano[2,3-*b*]pyran]-2'-carboxylate 4o**

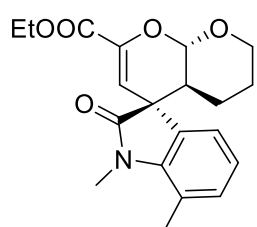

**4o**

White solid; mp 125–126 °C; 95% yield (both diastereomers), 98:2 *dr*, 94% *ee* [Daicel Chiralcel AD-H, hexanes/*i*-PrOH = 80/20, flow rate: 1.0 mL min<sup>-1</sup>, λ = 254.4 nm, t (major) = 11.430, t (minor) = 13.997]; [α]<sub>D</sub><sup>25</sup> = +161.0 (*c* 0.10, CHCl<sub>3</sub>); <sup>1</sup>H NMR (400 MHz, CDCl<sub>3</sub>) δ 7.06 – 7.01 (m, 1H), 6.99 – 6.92 (m, 2H), 5.67 (s, 1H), 5.62 (d, *J* = 8.9 Hz, 1H), 4.25 (qd, *J* = 7.1, 3.8 Hz, 2H), 4.15 – 4.01 (m, 1H), 3.65 (td, *J* = 12.0, 2.6 Hz, 1H), 3.49 (s, 3H), 2.58 (s, 3H), 1.91 (ddd, *J* = 12.7, 8.9, 4.1 Hz, 1H), 1.59 (dtd, *J* = 12.6, 8.3, 4.2 Hz, 1H), 1.52 – 1.43 (m, 1H), 1.35 – 1.22 (m, 5H); <sup>13</sup>C NMR (101 MHz, CDCl<sub>3</sub>) δ 176.0, 161.3, 144.0, 141.0, 132.2, 129.8, 122.7, 120.7, 119.3, 108.7, 97.6, 66.3, 61.0, 49.9, 42.0, 29.4, 24.7, 21.7, 18.5, 13.7; IR (KBr) ν<sub>max</sub>: 2942, 2864, 1721, 1674, 1484, 1365, 1321, 1242, 1183, 983, 834, 754, 647 cm<sup>-1</sup>; HRMS (ESI): *m/z* = 380.1477 (calcd for C<sub>20</sub>H<sub>23</sub>NO<sub>5</sub>+Na<sup>+</sup> = 380.1468).

**Ethyl-(3*aS*,4*S*,7*aR*)-1'-methyl-2'-oxo-2,3,3*a*,7*a*-tetrahydrospiro[furo[2,3-*b*]pyran-4,3'-indoline]-6-carboxylate 3a**

White solid; mp 172–173 °C; 93% yield (both diastereomers), 88:12 *dr*, 80% *ee* for the major, 60% *ee* for the minor [Daicel Chiralcel AD-H, hexanes/*i*-PrOH = 80/20,

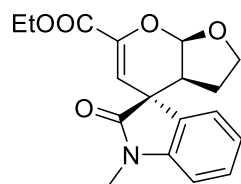

**3a**

flow rate: 1.0 mL min<sup>-1</sup>,  $\lambda = 254.4$  nm, *t* (major) = 13.944, *t* (minor) = 23.288];  $[\alpha]_D^{25} = -148.0$  (*c* 0.15, CHCl<sub>3</sub>); <sup>1</sup>H NMR (400 MHz, CDCl<sub>3</sub>)  $\delta$  7.31 (t, *J* = 7.7 Hz, 1H), 7.16 (d, *J* = 7.3 Hz, 1H), 7.08 (t, *J* = 7.5 Hz, 1H), 6.86 (d, *J* = 7.8 Hz, 1H), 5.80 (d, *J* = 3.3 Hz, 2H), 4.32 – 4.19 (m, 3H), 4.01 – 3.84 (m, 1H), 3.24 (s, 3H),

2.53 – 2.36 (m, 1H), 2.30 – 2.20 (m, 1H), 2.10 – 2.01 (m, 1H), 1.28 (t, *J* = 7.1 Hz, 3H); <sup>13</sup>C NMR (101 MHz, CDCl<sub>3</sub>)  $\delta$  175.9, 161.3, 142.9, 141.8, 132.6, 128.6, 123.4, 122.7, 108.0, 105.3, 99.3, 68.2, 61.1, 47.6, 43.9, 26.1, 24.1, 13.7; IR (KBr)  $\nu_{\max}$ : 2921, 1703, 1650, 1608, 1489, 1469, 1369, 1346, 1301, 1254, 1195, 1136, 1083, 1069, 1045, 1022, 1000, 928, 885, 844, 765, 749, 683 cm<sup>-1</sup>; HRMS (ESI): *m/z* = 352.1166 (calcd for C<sub>18</sub>H<sub>19</sub>NO<sub>5</sub>+Na<sup>+</sup> = 352.1155).

**Ethyl-(3aS,4S,7aR)-5'-chloro-1'-methyl-2'-oxo-2,3,3a,7a-tetrahydrospiro[furo [2,3-b]pyran-4,3'-indoline]-6-carboxylate **3b****

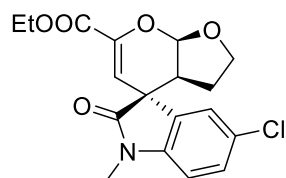

**3b**

White solid; mp 181–182 °C; 85% yield (both diastereomers), 87:13 *dr*, 99% *ee* for the major, 99% *ee* for the minor [Daicel Chiralcel IA-H, hexanes/*i*-PrOH = 80/20, flow rate: 1.0 mL min<sup>-1</sup>,  $\lambda = 254.4$  nm, *t* (major) = 13.201, *t* (minor) =

18.577];  $[\alpha]_D^{25} = -124.2$  (*c* 0.24, CHCl<sub>3</sub>); <sup>1</sup>H NMR (400 MHz, CDCl<sub>3</sub>)  $\delta$  7.29 (dt, *J* = 8.3, 1.9 Hz, 1H), 7.22 – 7.10 (m, 1H), 6.79 (dd, *J* = 8.4, 1.7 Hz, 1H), 6.15 – 5.54 (m, 2H), 4.32 – 4.19 (m, 3H), 3.94 (dt, *J* = 9.3, 7.5 Hz, 1H), 3.22 (s, 3H), 2.43 (tt, *J* = 12.1, 9.7 Hz, 1H), 2.34 – 2.18 (m, 1H), 2.13 – 1.96 (m, 1H), 1.32 – 1.27 (m, 3H); <sup>13</sup>C NMR (101 MHz, CDCl<sub>3</sub>)  $\delta$  175.5, 161.2, 143.3, 140.4, 134.1, 128.5, 128.1, 124.0, 108.9, 104.5, 99.2, 68.2, 61.3, 47.7, 43.7, 26.3, 24.0, 13.7; IR (KBr)  $\nu_{\max}$ : 2920, 2893, 1728, 1712, 1648, 1607, 1491, 1475, 1362, 1344, 1249, 1183, 1146, 1096, 1070, 1047, 1020, 989, 960, 882, 864, 842, 820, 766, 739, 680 cm<sup>-1</sup>; HRMS (ESI): *m/z* = 386.0779 (calcd for C<sub>18</sub>H<sub>18</sub>ClNO<sub>5</sub>+Na<sup>+</sup> = 386.0766).

**Ethyl-(3aS,4S,7aR)-5'-bromo-1'-methyl-2'-oxo-2,3,3a,7a-tetrahydrospiro[furo [2,3-b]pyran-4,3'-indoline]-6-carboxylate **3c****

White solid; mp 201–202 °C; 93% yield (both diastereomers), 88:12 *dr*, 99% *ee* for the major, 99% *ee* for the minor [Daicel Chiralcel AD-H, hexanes/*i*-PrOH = 80/20,

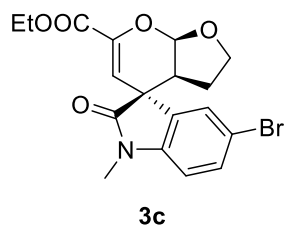

**3c**

flow rate: 1.0 mL min<sup>-1</sup>, λ = 254.4 nm, t (major) = 13.690, t (minor) = 20.131]; [α]<sub>D</sub><sup>25</sup> = -173.2 (c 0.21, CHCl<sub>3</sub>); <sup>1</sup>H NMR (400 MHz, CDCl<sub>3</sub>) δ 7.44 (dd, *J* = 8.3, 2.0 Hz, 1H), 7.28 (s, 1H), 6.74 (d, *J* = 8.3 Hz, 1H), 5.82 – 5.74 (m, 2H), 4.36 – 4.14 (m, , 3H), 3.94 (q, *J* = 8.6, 8.1 Hz, 1H), 3.22 (s, 3H),

2.55 – 2.34 (m, 1H), 2.32 – 2.17 (m, 1H), 2.12 – 1.96 (m, 1H), 1.36 – 1.26 (m, 3H); <sup>13</sup>C NMR (101 MHz, CDCl<sub>3</sub>) δ 175.4, 161.2, 143.3, 140.8, 134.5, 131.4, 126.7, 115.3, 109.4, 104.5, 99.2, 68.2, 61.3, 47.7, 43.7, 26.3, 24.0, 13.7; IR (KBr) ν<sub>max</sub>: 2955, 2889, 1728, 1714, 1647, 1605, 1489, 1420, 1363, 1342, 1249, 1181, 1093, 1070, 1047, 1019, 1005, 988, 882, 864, 842, 818, 765, 675 cm<sup>-1</sup>; HRMS (ESI): *m/z* = 430.0265 (calcd for C<sub>18</sub>H<sub>18</sub>BrNO<sub>5</sub>+Na<sup>+</sup> = 430.0261).

**Ethyl-(3aS,4S,7aR)-5'-methoxy-1'-methyl-2'-oxo-2,3,3a,7a-tetrahydrospiro[furo [2,3-b]pyran-4,3'-indoline]-6-carboxylate 3d**

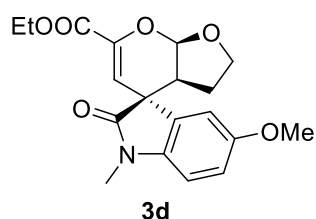

**3d**

White solid; mp 201–202 °C; 84% yield (both diastereomers), 84:16 *dr*, 98% *ee* for the major, 77% *ee* for the minor [Daicel Chiralcel AD-H, hexanes/*i*-PrOH = 80/20, flow rate: 1.0 mL min<sup>-1</sup>, λ = 254.4 nm, t (major) = 16.390, t (minor) = 22.553]; [α]<sub>D</sub><sup>25</sup> = -155.2 (c 0.25, CHCl<sub>3</sub>); <sup>1</sup>H NMR (400 MHz, CDCl<sub>3</sub>) δ 6.89 – 6.64 (m, 3H), 6.22 – 5.52 (m, 2H), 4.38 – 4.14 (m, 3H), 4.00 – 3.88 (m, 1H), 3.76 (s, 3H), 3.21 (s, 3H), 2.55 – 2.35 (m, 1H), 2.30 – 2.15 (m, 1H), 2.13 – 1.94 (m, 1H), 1.34 – 1.24 (m, 3H); <sup>13</sup>C NMR (101 MHz, CDCl<sub>3</sub>) δ 175.6, 161.3, 156.0, 142.9, 135.2, 133.8, 112.7, 110.9, 108.4, 105.4, 99.2, 68.3, 61.1, 55.4, 48.0, 43.9, 26.2, 24.1, 13.7; IR (KBr) ν<sub>max</sub>: 2920, 2894, 1727, 1708, 1647, 1598, 1494, 1455, 1352, 1287, 1251, 1227, 1157, 1101, 1068, 1049, 1036, 886, 834, 813, 771, 684, cm<sup>-1</sup>; HRMS (ESI): *m/z* = 382.1251 (calcd for C<sub>19</sub>H<sub>21</sub>NO<sub>6</sub>+Na<sup>+</sup> = 382.1261).

**Ethyl-(3aS,4S,7aR)-6'-chloro-1'-methyl-2'-oxo-2,3,3a,7a-tetrahydrospiro[furo [2,3-b]pyran-4,3'-indoline]-6-carboxylate 3e**

White solid; mp 67–68 °C; 91% yield (both diastereomers), 85:15 *dr*, 83% *ee* for the major, 50% *ee* for the minor [Daicel Chiralcel AD-H, hexanes/*i*-PrOH = 80/20, flow

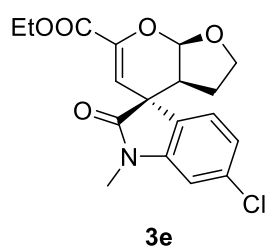

rate: 1.0 mL min<sup>-1</sup>, λ = 254.4 nm, t (major) = 18.481, t (minor) = 34.963]; [α]<sub>D</sub><sup>25</sup> = -192.0 (c 0.08, CHCl<sub>3</sub>); <sup>1</sup>H NMR (400 MHz, CDCl<sub>3</sub>) δ 7.15 – 6.99 (m, 2H), 6.87 (dd, *J* = 8.3, 1.8 Hz, 1H), 6.13 – 5.46 (m, 2H), 4.39 – 4.12 (m, 3H), 4.04 – 3.83 (m, 1H), 3.22 (s, 3H), 2.53 – 2.33 (m, 1H), 2.32 – 2.17 (m, 1H),

2.11 – 1.96 (m, 1H), 1.29 (t, *J* = 7.1 Hz, 3H); <sup>13</sup>C NMR (101 MHz, CDCl<sub>3</sub>) δ 175.9, 161.2, 143.1, 143.0, 134.4, 130.9, 124.4, 122.5, 108.7, 104.7, 99.2, 68.2, 61.2, 47.3, 43.8, 26.3, 24.0, 13.7; IR (KBr) ν<sub>max</sub>: 2919, 2851, 1716, 1650, 1605, 1493, 1366, 1298, 1248, 1106, 1071, 1049, 1023, 1002, 930, 893, 846, 718, 682 cm<sup>-1</sup>; HRMS (ESI): *m/z* = 386.0777 (calcd for C<sub>18</sub>H<sub>18</sub>ClNO<sub>5</sub>+Na<sup>+</sup> = 386.0766).

## 2.2 Procedure for the preparation of 5

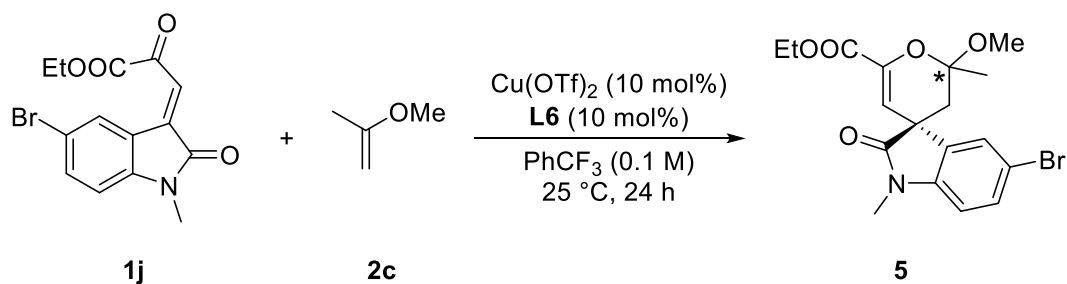

Under N<sub>2</sub> atmosphere, Cu(OTf)<sub>2</sub> (0.01 mmol, 10 mol%) and **L6** (0.01 mmol, 10 mol%) were charged into a flame-dried vessel, and anhydrous PhCF<sub>3</sub> (1 mL) was added *via* syringe. The resulting mixture was stirred at room temperature for 0.5 h. Then the substrates **1j** (0.1 mmol) and **2c** (0.4 mmol, 4 equiv) was introduced into the vessel. The reaction mixture was stirred at 25 °C for 24 h. When the reaction was detected complete (by TLC analysis), the solvent was removed under reduced pressure, and the resulting residue was purified by column chromatography on silica gel with petroleum ether/EtOAc (3/1) as eluent to give **5** as a white solid.

### Ethyl-(3*R*)-5-bromo-2'-methoxy-1,2'-dimethyl-2-oxo-2',3'-dihydro spiro[indoline-3,4'-pyran]-6'-carboxylate **5**

White solid; mp 56–57 °C; 92% yield (both diastereomers), 99:1 *dr*, 93% *ee* [Daicel Chiralcel AD-H, hexanes/*i*-PrOH = 80/20, flow rate: 1.0 mL min<sup>-1</sup>, λ = 254.4 nm, t

(major) = 6.932, t (minor) = 8.501];  $[\alpha]_D^{25} = +62.1$  (*c* 0.10, CHCl<sub>3</sub>); <sup>1</sup>H NMR (400 MHz, CDCl<sub>3</sub>) δ 7.74 (d, *J* = 2.0 Hz, 1H), 7.40 (dd, *J* = 8.2, 2.1 Hz, 1H), 6.71 (d, *J* = 8.2 Hz, 1H), 5.77 (s, 1H), 4.38 – 4.04 (m, 2H), 3.39 (s, 3H), 3.20 (s, 3H), 2.50 (d, *J* = 14.1 Hz, 1H), 2.10 (d, *J* = 14.0 Hz, 1H), 1.63 (s, 3H), 1.27 (t, *J* = 7.1 Hz, 3H); <sup>13</sup>C NMR (101 MHz, CDCl<sub>3</sub>) δ 177.0, 161.7, 142.0, 141.5, 133.8, 130.8, 130.3, 115.1, 110.5, 109.0, 98.6, 60.9, 48.6, 47.2, 39.6, 26.4, 22.1, 13.7; IR (KBr)  $\nu_{\max}$ : 2936, 2836, 1719, 1650, 1605, 1466, 1362, 1335, 1294, 1260, 1229, 1200, 1179, 1156, 1126, 1095, 1076, 1050, 1021, 852, 832, 808, 649 cm<sup>-1</sup>; HRMS (ESI): *m/z* = 432.0426 (calcd for C<sub>18</sub>H<sub>20</sub>BrNO<sub>5</sub>+H<sup>+</sup> = 432.0417).

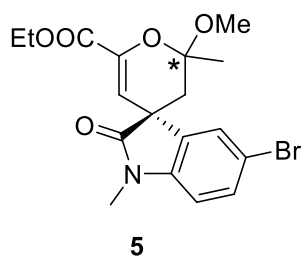

### 2.3 Procedure for the preparation of **6**

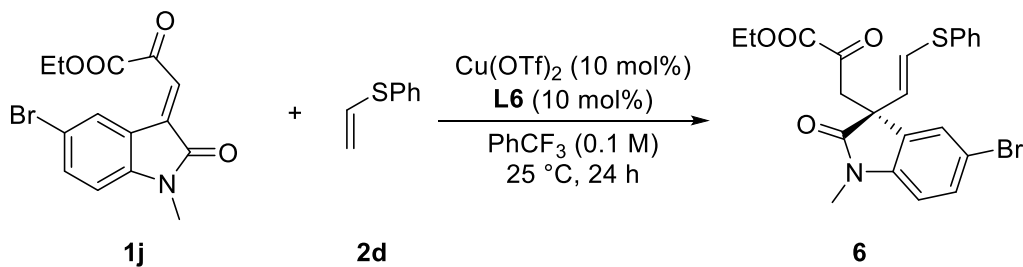

Under N<sub>2</sub> atmosphere, Cu(OTf)<sub>2</sub> (0.01 mmol, 10 mol%) and **L6** (0.01 mmol, 10 mol%) were charged into a flame-dried vessel, and anhydrous PhCF<sub>3</sub> (1 mL) was added *via* syringe. The resulting mixture was stirred at room temperature for 0.5 h. Then the substrates **1j** (0.1 mmol) and **2d** (0.2 mmol, 2 equiv) was introduced into the vessel. The reaction mixture was stirred at 25 °C for 24 h. When the reaction was detected complete (by TLC analysis), the solvent was removed under reduced pressure, and the resulting residue was purified by column chromatography on silica gel with petroleum ether/EtOAc (3/1) as eluent to give **6** as a white solid.

#### **Ethyl-(*S,E*)-3-(5-bromo-1-methyl-2-oxo-3-(2-(phenylthio)vinyl)indolin-3-yl)-2-oxopropanoate **6****

White solid; mp 86–87 °C; 88% yield (both diastereomers), 90:10 *E/Z*, 99% *ee* for the major, 99% *ee* for the minor [Daicel Chiralcel AD-H, hexanes/*i*-PrOH = 95/5, flow rate: 1.0 mL min<sup>-1</sup>, λ = 254.4 nm, t (major) = 25.165, t (minor) = 42.134];  $[\alpha]_D^{25} =$

–193.0 (*c* 0.12, CHCl<sub>3</sub>); <sup>1</sup>H NMR (400 MHz, CDCl<sub>3</sub>) δ 7.51 – 7.14 (m, 7H), 6.76 (d, *J* = 8.3 Hz, 1H), 6.25 (d, *J* = 15.2 Hz, 1H), 5.75 (d, *J* = 15.3 Hz, 1H), 4.25 (q, *J* = 7.1 Hz, 2H), 3.85 – 3.43 (m, 2H), 3.23 (s, 3H), 1.31 (t, *J* = 7.1 Hz, 3H); <sup>13</sup>C NMR (101 MHz, CDCl<sub>3</sub>) δ 189.3, 175.4, 159.1, 142.8, 133.1, 131.2, 130.7, 129.9, 128.8, 127.1, 127.0, 126.89, 126.1, 114.7, 109.7, 62.4, 51.3, 45.1, 26.3, 13.4; IR (KBr)  $\nu_{\max}$ : 2932, 1713, 1651, 1605, 1488, 1466, 1336, 1296, 1261, 1230, 1095, 1052, 941, 817, 742, 701, 649 cm<sup>-1</sup>; HRMS (ESI): *m/z* = 496.0199 (calcd for C<sub>22</sub>H<sub>20</sub>SBrNO<sub>4</sub>+Na<sup>+</sup> = 496.0189).

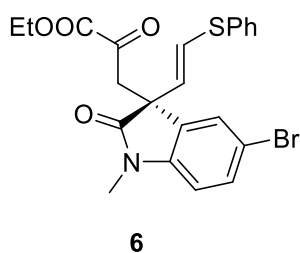

**6**

#### 2.4 Procedure for the preparation of **7**

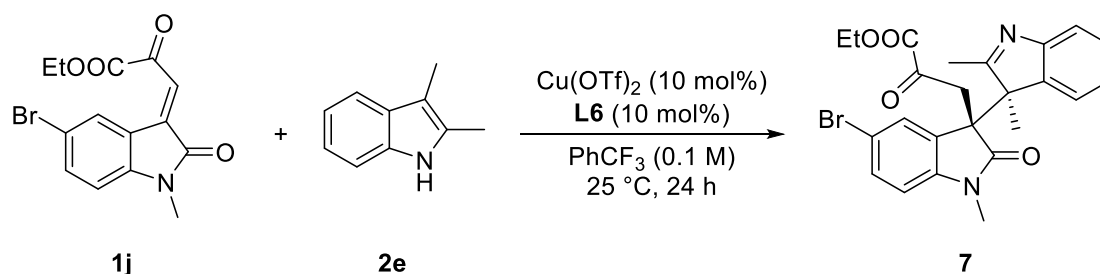

Under N<sub>2</sub> atmosphere, Cu(OTf)<sub>2</sub> (0.01 mmol, 10 mol%) and **L6** (0.01 mmol, 10 mol%) were charged into a flame-dried vessel, and anhydrous PhCF<sub>3</sub> (1 mL) was added *via* syringe. The resulting mixture was stirred at room temperature for 0.5 h. Then the substrates **1j** (0.1 mmol) and **2e** (0.2 mmol, 2 equiv) was introduced into the vessel. The reaction mixture was stirred at 25 °C for 24 h. When the reaction was detected complete (by TLC analysis), the solvent was removed under reduced pressure, and the resulting residue was purified by column chromatography on silica gel with petroleum ether/EtOAc (3/1) as eluent to give **7** as a yellow solid.

#### **Ethyl-3-(5-bromo-3-(2,3-dimethyl-3H-indol-3-yl)-1-methyl-2-oxoindolin-3-yl)-2-oxopropanoate **7****

Yellow solid; mp 92–93 °C; 33% yield, 83:17 *dr*, 0% *ee* [Daicel Chiralcel AD-H, hexanes/*i*-PrOH = 80/20, flow rate: 1.0 mL min<sup>-1</sup>, λ = 254.4 nm, t (major) = 23.056, t (minor) = 26.836]; <sup>1</sup>H NMR (400 MHz, CDCl<sub>3</sub>) δ 7.75 (s, 1H), 7.51 – 7.32 (m, 3H),

7.19 (d,  $J = 1.8$  Hz, 1H), 7.05 (dd,  $J = 8.3, 1.8$  Hz, 1H), 6.79 (d,  $J = 8.3$  Hz, 1H), 4.25 (qd,  $J = 7.1, 1.7$  Hz, 2H), 4.16 – 3.90 (m, 2H), 3.23 (s, 3H), 2.32 (s, 3H), 2.17 (s, 3H),

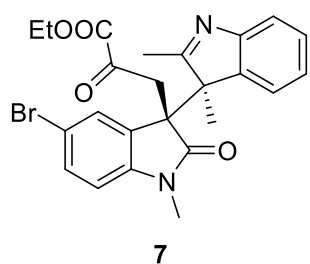

1.31 (t,  $J = 7.1$  Hz, 3H);  $^{13}\text{C}$  NMR (101 MHz,  $\text{CDCl}_3$ )  $\delta$  189.9, 177.5, 159.3, 143.4, 134.7, 133.3, 131.4, 130.8, 129.8, 126.7, 117.8, 116.8, 114.4, 109.4, 107.7, 106.5, 62.3, 52.3, 46.9, 29.2, 26.3, 13.4, 11.1, 7.9; IR (KBr)  $\nu_{\text{max}}$ : 2918, 2850, 1718, 1705, 1606, 1487, 1467, 1363, 1340,

1260, 1095, 1054, 1022, 806, 730, 689, 648, 632  $\text{cm}^{-1}$ ; HRMS (ESI):  $m/z = 505.0727$  (calcd for  $\text{C}_{24}\text{H}_{23}\text{BrN}_2\text{O}_4 + \text{Na}^+ = 505.0733$ ).

## 2.5 General procedure for the preparation of **9**

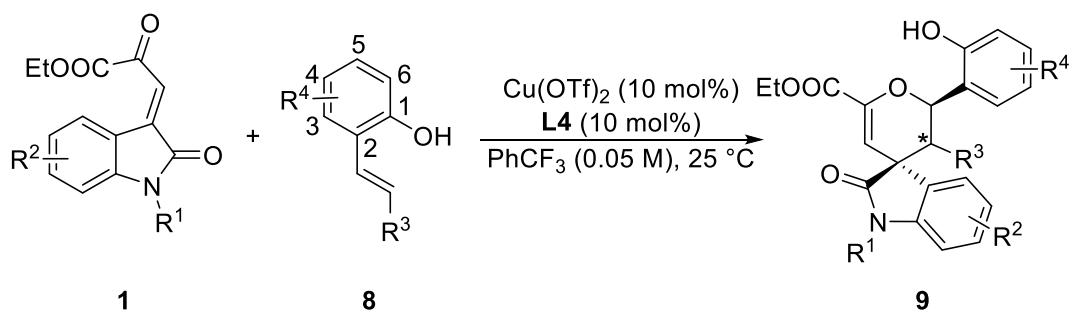

Under  $\text{N}_2$  atmosphere,  $\text{Cu(OTf)}_2$  (0.01 mmol, 10 mol %) and **L4** (0.01 mmol, 10 mol %) were charged into a flame-dried vessel, and anhydrous  $\text{PhCF}_3$  (2 mL) was added *via* syringe. The resulting mixture was stirred at room temperature for 0.5 h. Then the substrates **1** (0.1 mmol) and **8** (0.12 mmol, 1.2 equiv) was introduced into the vessel. The reaction mixture was stirred at 25  $^\circ\text{C}$  until the reaction was detected complete. The solvent was removed under reduced pressure, the resulting residue was purified by column chromatography on silica gel with petroleum ether/EtOAc (3/1) as eluent to give **9** as solids.

The racemic samples described in this work were synthesized according above procedure, which were catalyzed by  $\text{Cu(OTf)}_2$  with mixed **L4** and *ent*-**L4** as ligands in toluene. Because equal amount of **L4** and *ent*-**L4** could not be accurately balanced, slight ee values (<10%) were observed in their racemic HPLC spectra. And a little amount of unseparate byproduct was detected in some cases due to the use of toluene as reaction media. In addition, for the preparation of racemic **9a**, the reaction was



stirred at 90 °C for extra 3 h to give **9a** with relatively low diastereoselectivity.

**Ethyl(2'*R*,3*R*)-2'-(2-hydroxyphenyl)-1-methyl-2-oxo-2',3'-dihydro  
spiro[indoline-3,4'-pyran]-6'-carboxylate **9a****

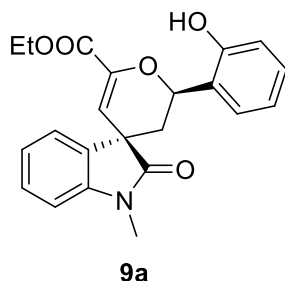

White solid; mp 83–84 °C; 95% yield (both diastereomers), 98:2 *dr*, 93% *ee* [Daicel Chiralcel AD-H, hexanes/*i*-PrOH = 80/20, flow rate: 1.0 mL min<sup>-1</sup>, λ = 254.4 nm, t (major) = 16.723, t (minor) = 12.119]; [α]<sub>D</sub><sup>25</sup> = -104.6 (*c* 0.19, CHCl<sub>3</sub>); <sup>1</sup>H NMR (400 MHz, CDCl<sub>3</sub>) δ 7.44 – 7.31 (m, 2H), 7.21 (dd, *J* = 7.7, 1.7 Hz, 1H), 7.17 – 7.09 (m, 2H), 6.95 – 6.80 (m, 4H),

5.88 (d, *J* = 1.7 Hz, 1H), 5.61 (dd, *J* = 12.3, 2.1 Hz, 1H), 4.26 (qd, *J* = 7.2, 1.2 Hz, 2H), 3.26 (s, 3H), 2.58 (dd, *J* = 13.7, 12.3 Hz, 1H), 2.09 (dt, *J* = 13.7, 2.0 Hz, 1H), 1.30 (t, *J* = 7.1 Hz, 3H); <sup>13</sup>C NMR (100 MHz, CDCl<sub>3</sub>) δ 177.0, 161.6, 153.7, 146.0, 142.3, 132.5, 129.1, 128.5, 126.2, 124.0, 123.8, 122.7, 119.9, 116.4, 108.5, 108.1, 73.0, 61.2, 47.1, 36.1, 26.3, 13.7; IR (KBr) ν<sub>max</sub>: 3411, 1713, 1687, 1644, 1609, 1491, 1469, 1457, 1371, 1352, 1296, 1243, 1169, 1133, 1112, 1087, 1044, 1019, 983, 859, 822, 752, 688 cm<sup>-1</sup>; HRMS (ESI): *m/z* = 380.1499 (calcd for C<sub>22</sub>H<sub>21</sub>NO<sub>5</sub>+H<sup>+</sup> = 380.1492).

**Ethyl (2'*R*,3*R*)-1-allyl-2'-(2-hydroxyphenyl)-2-oxo-2',3'-dihydro  
spiro[indoline-3,4'-pyran]-6'-carboxylate **9b****

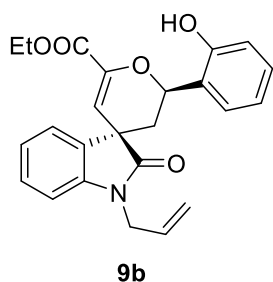

White solid; mp 81–82 °C; 88% yield (both diastereomers), 93:7 *dr*, 93% *ee* [Daicel Chiralcel AD-H, hexanes/*i*-PrOH = 75/25, flow rate: 1.0 mL min<sup>-1</sup>, λ = 254.4 nm, t (major) = 9.166, t (minor) = 6.158]; [α]<sub>D</sub><sup>25</sup> = -98.0 (*c* 0.3, CHCl<sub>3</sub>); <sup>1</sup>H NMR (400 MHz, CDCl<sub>3</sub>) δ 7.42 (d, *J* = 7.4 Hz, 1H), 7.35 –

7.28 (m, 1H), 7.23 (dd, *J* = 7.7, 1.6 Hz, 1H), 7.17 – 7.07 (m, 2H), 6.96 – 6.78 (m, 4H), 5.92 – 5.87 (m, 1H), 5.82 (dq, *J* = 10.5, 5.4 Hz, 1H), 5.63 (dd, *J* = 12.4, 2.1 Hz, 1H), 5.33 – 5.13 (m, 2H), 4.51 – 4.15 (m, 4H), 2.71 – 2.46 (m, 1H), 2.11 (dt, *J* = 13.6, 2.1 Hz, 1H), 1.30 (t, *J* = 7.1 Hz, 3H); <sup>13</sup>C NMR (101 MHz, CDCl<sub>3</sub>) δ 176.8, 161.7, 153.7, 146.0, 141.4, 132.5, 130.5, 129.1, 128.3, 126.3, 124.1, 123.8, 122.6, 120.0, 117.4, 116.3, 109.0, 108.4, 72.9, 61.3, 47.1, 42.2, 36.4, 13.7; IR (KBr) ν<sub>max</sub>: 3456, 1732,

1701, 1609, 1486, 1458, 1357, 1298, 1268, 1240, 1209, 1181, 1098, 1086, 1028, 1013, 860, 819, 771, 758, 732, 691  $\text{cm}^{-1}$ ; HRMS (ESI):  $m/z = 406.1659$  (calcd for  $\text{C}_{24}\text{H}_{23}\text{NO}_5 + \text{H}^+ = 406.1649$ ).

**Ethyl (2'*R*,3*R*)-2'-(2-hydroxyphenyl)-1-(methoxymethyl)-2-oxo-2',3'-dihydro spiro[indoline-3,4'-pyran]-6'-carboxylate 9c**

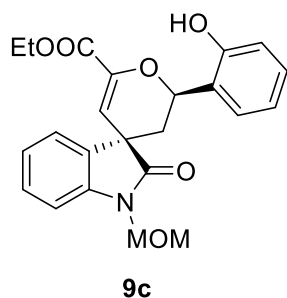

White solid; mp 67–68 °C; 82% yield (both diastereomers), 96:4 *dr*, 94% *ee* [Daicel Chiralcel AD-H, hexanes/*i*-PrOH = 80/20, flow rate: 1.0 mL  $\text{min}^{-1}$ ,  $\lambda = 254.4$  nm,  $t$  (major) = 15.888,  $t$  (minor) = 8.507];  $[\alpha]_{\text{D}}^{25} = -100.0$  ( $c$  0.13,  $\text{CHCl}_3$ );  $^1\text{H}$  NMR (400 MHz,  $\text{CDCl}_3$ )  $\delta$  7.42 (dd,  $J = 7.6, 1.2$  Hz, 1H), 7.34 (td,  $J = 7.8, 1.2$  Hz, 1H), 7.24 (dd,  $J = 7.7, 1.6$  Hz, 1H), 7.19 – 7.06 (m, 3H), 6.94 – 6.75 (m, 3H), 5.90 (d,  $J = 1.7$  Hz, 1H), 5.62 (dd,  $J = 12.3, 2.1$  Hz, 1H), 5.26 – 5.04 (m, 2H), 4.27 (qt,  $J = 6.4, 3.3$  Hz, 2H), 3.33 (s, 3H), 2.57 (t,  $J = 13.0$  Hz, 1H), 2.11 (dt,  $J = 13.7, 2.0$  Hz, 1H), 1.30 (t,  $J = 7.1$  Hz, 3H);  $^{13}\text{C}$  NMR (101 MHz,  $\text{CDCl}_3$ )  $\delta$  177.8, 161.7, 153.5, 146.1, 140.4, 132.1, 129.1, 128.5, 126.3, 124.2, 123.9, 123.2, 120.0, 116.2, 109.6, 108.1, 72.6, 71.2, 61.3, 55.9, 47.4, 36.6, 13.7; IR (KBr)  $\nu_{\text{max}}$ : 2936, 1719, 1646, 1610, 1485, 1457, 1366, 1345, 1292, 1246, 1198, 1172, 1128, 1090, 1076, 1045, 1019, 984, 913, 821, 752, 691  $\text{cm}^{-1}$ ; HRMS (ESI):  $m/z = 410.1605$  (calcd for  $\text{C}_{23}\text{H}_{23}\text{NO}_6 + \text{H}^+ = 410.1598$ ).

**Ethyl (2'*R*,3*R*)-2'-(2-hydroxyphenyl)-1,5-dimethyl-2-oxo-2',3'-dihydro spiro[indoline-3,4'-pyran]-6'-carboxylate 9e**

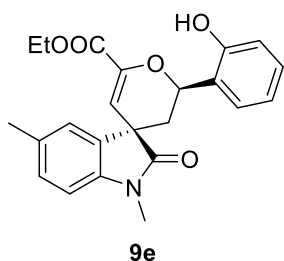

White solid; mp 235–236 °C; 92% yield (both diastereomers), 98:2 *dr*, 98% *ee* [Daicel Chiralcel AD-H, hexanes/*i*-PrOH = 80/20, flow rate: 1.0 mL  $\text{min}^{-1}$ ,  $\lambda = 254.4$  nm,  $t$  (major) = 13.211,  $t$  (minor) = 8.387];  $[\alpha]_{\text{D}}^{25} = -140.0$  ( $c$  0.17,  $\text{CHCl}_3$ );  $^1\text{H}$  NMR (400 MHz,  $\text{CDCl}_3$ )  $\delta$  7.17 (dd,  $J = 15.8, 8.1$  Hz, 4H), 6.98 (d,  $J = 24.6$  Hz, 1H), 6.90 – 6.84 (m, 2H), 6.80 (d,  $J = 8.0$  Hz, 1H), 5.88 (s, 1H), 5.60 (d,  $J = 12.1$  Hz, 1H), 4.27 (q,  $J = 7.2$  Hz, 2H), 3.24 (s, 3H), 2.61 (t,  $J = 13.1$  Hz, 1H), 2.36 (s, 3H), 2.12 (d,  $J = 13.7$  Hz, 1H), 1.30 (t,  $J = 7.2$  Hz, 3H);  $^{13}\text{C}$  NMR (101 MHz,  $\text{CDCl}_3$ )  $\delta$  176.8, 161.5, 154.1, 145.7, 139.9, 132.5, 132.3, 129.2, 128.7, 126.1,

124.86, 123.6, 119.9, 116.7, 108.9, 107.8, 73.5, 61.2, 47.0, 35.9, 26.3, 20.7, 13.7; IR (KBr)  $\nu_{\max}$ : 3218, 1728, 1680, 1649, 1605, 1498, 1459, 1367, 1291, 1264, 1239, 1156, 1106, 1089, 1074, 1036, 1022, 985, 969, 867, 822, 800, 779, 757, 666  $\text{cm}^{-1}$ ; HRMS (ESI):  $m/z = 394.1655$  (calcd for  $\text{C}_{23}\text{H}_{23}\text{NO}_5 + \text{H}^+ = 394.1649$ ).

**Ethyl (2'*R*,3*R*)-2'-(2-hydroxyphenyl)-5-methoxy-1-methyl-2-oxo-2',3'-dihydro spiro[indoline-3,4'-pyran]-6'-carboxylate **9f****

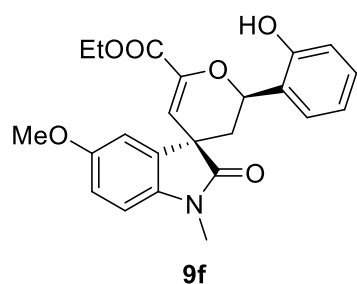

White solid; mp 198–199 °C; 88% yield (both diastereomers), 98:2 *dr*, 92% *ee* [Daicel Chiralcel AD-H, hexanes/*i*-PrOH = 75/25, flow rate: 1.0 mL  $\text{min}^{-1}$ ,  $\lambda = 254.4$  nm,  $t$  (major) = 10.385,  $t$  (minor) = 8.791];  $[\alpha]_{\text{D}}^{25} = -187.5$  ( $c$  0.20,  $\text{CHCl}_3$ );  $^1\text{H}$  NMR (400 MHz,  $\text{CDCl}_3$ )  $\delta$  7.23 (d,  $J = 7.6$  Hz, 1H), 7.15 (dt,  $J = 15.6, 7.3$  Hz, 1H), 6.99 (d,  $J = 28.8$  Hz, 2H), 6.91 – 6.76 (m, 4H), 5.95 – 5.81 (m, 1H), 5.59 (d,  $J = 12.1$  Hz, 1H), 4.32 – 4.18 (m, 2H), 3.79 (s, 3H), 3.22 (s, 3H), 2.55 (t,  $J = 13.1$  Hz, 1H), 2.09 (d,  $J = 13.8$  Hz, 1H), 1.29 (t,  $J = 7.1$  Hz, 3H);  $^{13}\text{C}$  NMR (101 MHz,  $\text{CDCl}_3$ )  $\delta$  176.7, 161.6, 155.9, 153.6, 146.1, 135.7, 133.8, 129.0, 126.2, 123.9, 119.9, 116.3, 112.6, 111.7, 108.4, 108.4, 72.8, 61.2, 55.5, 47.5, 36.1, 26.4, 13.6; IR (KBr)  $\nu_{\max}$ : 2979, 1725, 1678, 1637, 1603, 1497, 1458, 1371, 1299, 1289, 1275, 1253, 1241, 1232, 1137, 1107, 1073, 1038, 1023, 818, 766, 668  $\text{cm}^{-1}$ ; HRMS (ESI):  $m/z = 410.1606$  (calcd for  $\text{C}_{23}\text{H}_{23}\text{NO}_6 + \text{H}^+ = 410.1598$ ).

**Ethyl (2'*R*,3*R*)-5-fluoro-2'-(2-hydroxyphenyl)-1-methyl-2-oxo-2',3'-dihydro spiro[indoline-3,4'-pyran]-6'-carboxylate **9g****

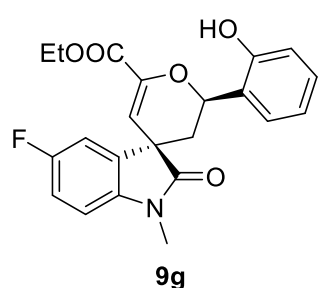

White solid; mp 96–97 °C; 93% yield (both diastereomers), 97:3 *dr*, 97% *ee* [Daicel Chiralcel AD-H, hexanes/*i*-PrOH = 80/20, flow rate: 1.0 mL  $\text{min}^{-1}$ ,  $\lambda = 254.4$  nm,  $t$  (major) = 11.465,  $t$  (minor) = 14.901];  $[\alpha]_{\text{D}}^{25} = -65.4$  ( $c$  0.13,  $\text{CHCl}_3$ );  $^1\text{H}$  NMR (400 MHz,  $\text{DMSO}-d_6$ )  $\delta$  9.70 (s, 1H), 7.53 (dd,  $J = 8.5, 2.6$  Hz, 1H), 7.46 – 7.38 (m, 1H), 7.22 (dtd,  $J = 22.1, 8.3, 7.7, 2.1$  Hz, 2H), 7.13 (dd,  $J = 8.6, 4.3$  Hz, 1H), 6.91 (t,  $J = 7.5$  Hz, 1H), 6.85 (d,  $J = 8.0$  Hz, 1H), 5.86 – 5.74 (m, 1H), 5.63 (dd,  $J = 11.8, 2.2$  Hz, 1H), 4.23 (q,  $J = 7.0$

Hz, 2H), 3.19 (s, 3H), 2.24 – 1.92 (m, 2H), 1.26 (t,  $J = 7.1$  Hz, 3H);  $^{19}\text{F}$  NMR (376 MHz,  $\text{CDCl}_3$ )  $\delta$  -119.4;  $^{13}\text{C}$  NMR (101 MHz,  $\text{DMSO}-d_6$ )  $\delta$  176.4, 161.6, 158.6 (d,  $J = 236.0$  Hz), 153.8, 146.8, 139.2, 134.3 (d,  $J = 8.0$  Hz), 128.9, 126.4, 125.8, 119.2, 115.2, 114.7 (d,  $J = 23.0$  Hz), 112.4 (d,  $J = 25.0$  Hz), 109.6 (d,  $J = 8.0$  Hz), 108.1, 70.4, 61.0, 47.6, 36.7, 26.7, 14.0; IR (KBr)  $\nu_{\text{max}}$ : 2961, 1725, 1689, 1493, 1458, 1259, 1087, 1020, 862, 799, 752, 699, 670, 630, 616  $\text{cm}^{-1}$ ; HRMS (ESI):  $m/z = 398.1410$  (calcd for  $\text{C}_{22}\text{H}_{20}\text{FNO}_5 + \text{H}^+ = 398.1398$ ).

**Ethyl (2'R,3R)-5-chloro-2'-(2-hydroxyphenyl)-1-methyl-2-oxo-2',3'-dihydro spiro[indoline-3,4'-pyran]-6'-carboxylate 9h**

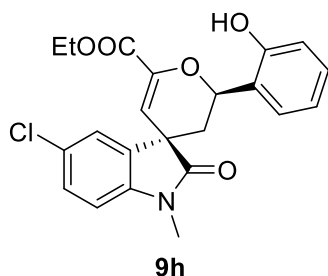

White solid; mp 211–212 °C; 94% yield, 99:1 *dr*, 98% *ee* [Daicel Chiralcel AD-H, hexanes/*i*-PrOH = 80/20, flow rate: 1.0 mL min<sup>-1</sup>,  $\lambda = 254.4$  nm,  $t$  (major) = 13.110,  $t$  (minor) = 11.333];  $[\alpha]_{\text{D}}^{25} = -215.1$  ( $c$  0.23,  $\text{CHCl}_3$ );  $^1\text{H}$  NMR (400 MHz,  $\text{CDCl}_3$ )  $\delta$  7.38 (d,  $J = 2.1$  Hz, 1H), 7.33 (dd,  $J = 8.3, 2.1$  Hz, 1H), 7.23 (dd,  $J = 7.8, 1.6$  Hz, 1H),

7.17 (td,  $J = 7.7, 1.7$  Hz, 1H), 6.92 – 6.80 (m, 3H), 6.68 (s, 1H), 5.85 (d,  $J = 1.8$  Hz, 1H), 5.54 (dd,  $J = 12.3, 2.1$  Hz, 1H), 4.27 (p,  $J = 7.0$  Hz, 2H), 3.24 (s, 3H), 2.57 (t,  $J = 13.1$  Hz, 1H), 2.11 (dt,  $J = 13.8, 2.1$  Hz, 1H), 1.31 (t,  $J = 7.1$  Hz, 3H);  $^{13}\text{C}$  NMR (101 MHz,  $\text{CDCl}_3$ )  $\delta$  176.5, 161.4, 153.6, 146.3, 140.9, 134.1, 129.2, 128.4, 128.0, 126.2, 124.5, 123.6, 120.1, 116.4, 109.0, 107.6, 73.0, 61.3, 47.2, 35.9, 26.4, 13.6; IR (KBr)  $\nu_{\text{max}}$ : 3411, 1705, 1638, 1605, 1485, 1458, 1361, 1344, 1300, 1274, 1256, 1179, 1139, 1117, 1096, 1011, 822, 775, 763, 656, 628  $\text{cm}^{-1}$ ; HRMS (ESI):  $m/z = 414.1113$  (calcd for  $\text{C}_{22}\text{H}_{20}\text{ClNO}_5 + \text{H}^+ = 414.1103$ ).

**Ethyl (2'R,3R)-5-bromo-2'-(2-hydroxyphenyl)-1-methyl-2-oxo-2',3'-dihydro spiro[indoline-3,4'-pyran]-6'-carboxylate 9i**

White solid; mp 217–218 °C; 92% yield, 99:1 *dr*, 99% *ee* [Daicel Chiralcel AD-H, hexanes/*i*-PrOH = 80/20, flow rate: 1.0 mL min<sup>-1</sup>,  $\lambda = 254.4$  nm,  $t$  (major) = 14.380,  $t$  (minor) = 10.363];  $[\alpha]_{\text{D}}^{25} = -148.0$  ( $c$  0.25,  $\text{CHCl}_3$ );  $^1\text{H}$  NMR (400 MHz,  $\text{CDCl}_3$ )  $\delta$  7.52 (d,  $J = 2.0$  Hz, 1H), 7.47 (dd,  $J = 8.2, 2.0$  Hz, 1H), 7.25 (s, 1H), 7.15 (t,  $J = 7.8$  Hz, 1H), 6.82 (dh,  $J = 24.0, 7.8$  Hz, 4H), 5.91 – 5.76 (m, 1H), 5.62 – 5.45 (m, 1H),

4.26 (p,  $J = 7.0$  Hz, 2H), 3.24 (s, 3H), 2.56 (t,  $J = 13.1$  Hz, 1H), 2.10 (dt,  $J = 13.7$ , 2.1 Hz, 1H), 1.31 (t,  $J = 7.1$  Hz, 3H);  $^{13}\text{C}$  NMR (101 MHz,  $\text{CDCl}_3$ )  $\delta$  176.5, 161.4, 153.6,

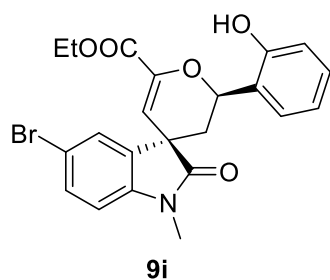

9i

146.4, 141.3, 134.5, 131.3, 129.1, 127.2, 126.2, 123.7, 120.1, 116.3, 115.3, 109.5, 107.6, 72.8, 61.3, 47.2, 35.9, 26.4, 13.7; IR (KBr)  $\nu_{\text{max}}$ : 3452, 1715, 1704, 1629, 1600, 1478, 1458, 1366, 1342, 1298, 1240, 1175, 1160, 1117, 1086, 1056, 1017, 999, 820, 758, 733, 698  $\text{cm}^{-1}$ ; HRMS

(ESI):  $m/z = 458.0601$  (calcd for  $\text{C}_{22}\text{H}_{20}\text{BrNO}_5 + \text{H}^+ = 458.0598$ ).

**Ethyl (2'R,3R)-6-chloro-2'-(2-hydroxyphenyl)-1-methyl-2-oxo-2',3'-dihydro spiro[indoline-3,4'-pyran]-6'-carboxylate 9j**

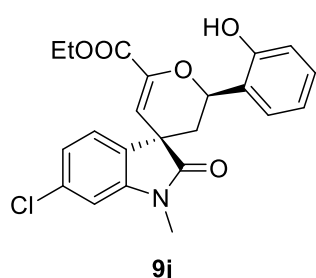

9j

White solid; mp 103–104 °C; 82% yield (both diastereomers), 93:7 *dr*, 89% *ee* [Daicel Chiralcel AD-H, hexanes/*i*-PrOH = 90/10, flow rate: 1.0  $\text{mL min}^{-1}$ ,  $\lambda = 254.4$  nm,  $t$  (major) = 21.280,  $t$  (minor) = 15.597];  $[\alpha]_{\text{D}}^{25} = -128.3$  ( $c$  0.12,  $\text{CHCl}_3$ );  $^1\text{H}$  NMR (400 MHz,  $\text{CDCl}_3$ )  $\delta$

7.30 (d,  $J = 8.0$  Hz, 1H), 7.26 – 7.22 (m, 1H), 7.16 – 7.05 (m, 2H), 6.97 – 6.83 (m, 3H), 6.79 (d,  $J = 8.1$  Hz, 1H), 5.83 (d,  $J = 1.7$  Hz, 1H), 5.64 – 5.46 (m, 1H), 4.26 (q,  $J = 7.1$  Hz, 2H), 3.23 (s, 3H), 2.65 – 2.42 (m, 1H), 2.17 – 1.97 (m, 1H), 1.30 (t,  $J = 7.1$  Hz, 3H);  $^{13}\text{C}$  NMR (101 MHz,  $\text{CDCl}_3$ )  $\delta$  177.1, 161.6, 153.4, 146.4, 143.5, 134.4, 130.9, 129.0, 126.2, 124.9, 123.9, 122.4, 120.1, 116.1, 108.8, 107.6, 72.5, 61.3, 46.8, 36.2, 26.4, 13.6; IR (KBr)  $\nu_{\text{max}}$ : 2961, 1717, 1699, 1685, 1652, 1647, 1605, 1491, 1457, 1367, 1295, 1247, 1170, 1088, 1073, 1042, 1016, 818, 754, 712, 668  $\text{cm}^{-1}$ ; HRMS (ESI):  $m/z = 414.1113$  (calcd for  $\text{C}_{22}\text{H}_{20}\text{ClNO}_5 + \text{H}^+ = 414.1103$ ).

**Ethyl (2'R,3R)-2'-(2-hydroxyphenyl)-1,7-dimethyl-2-oxo-2',3'-dihydro spiro[indoline-3,4'-pyran]-6'-carboxylate 9k**

White solid; mp 84–85 °C; 95% yield (both diastereomers), 96:4 *dr*, 96% *ee* [Daicel Chiralcel AD-H, hexanes/*i*-PrOH = 80/20, flow rate: 1.0  $\text{mL min}^{-1}$ ,  $\lambda = 254.4$  nm,  $t$  (major) = 20.484,  $t$  (minor) = 11.478];  $[\alpha]_{\text{D}}^{25} = -102.6$  ( $c$  0.43,  $\text{CHCl}_3$ );  $^1\text{H}$  NMR (400 MHz,  $\text{CDCl}_3$ )  $\delta$  7.25 – 7.18 (m, 2H), 7.15 – 7.05 (m, 2H), 7.03 – 6.92 (m, 2H), 6.89 – 6.77 (m, 2H), 5.86 (d,  $J = 1.7$  Hz, 1H), 5.59 (dd,  $J = 12.3, 2.1$  Hz, 1H), 4.25 (qd,  $J =$

7.1, 1.9 Hz, 2H), 3.53 (s, 3H), 2.60 (s, 3H), 2.58 – 2.48 (m, 1H), 2.06 (dt,  $J = 13.7, 1.9$

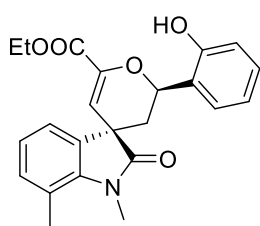

**9k**

Hz, 1H), 1.29 (t,  $J = 7.1$  Hz, 3H);  $^{13}\text{C}$  NMR (101 MHz,  $\text{CDCl}_3$ )  $\delta$  177.9, 161.7, 153.7, 145.8, 134.0, 133.2, 132.2, 129.0, 126.2, 123.9, 122.5, 122.1, 119.9, 119.7, 116.3, 108.8, 72.7, 61.2, 46.5, 36.5, 29.7, 18.6, 13.6; IR (KBr)  $\nu_{\text{max}}$ : 3340, 1699, 1642, 1597, 1456, 1361, 1298, 1247, 1174, 1137,

1118, 1093, 1064, 1010, 757, 750, 701  $\text{cm}^{-1}$ ; HRMS (ESI):  $m/z = 394.1660$  (calcd for  $\text{C}_{23}\text{H}_{23}\text{NO}_5 + \text{H}^+ = 394.1649$ ).

**Ethyl (2'R,3R)-7-fluoro-2'-(2-hydroxyphenyl)-1-methyl-2-oxo-2',3'-dihydro spiro[indoline-3,4'-pyran]-6'-carboxylate 9l**

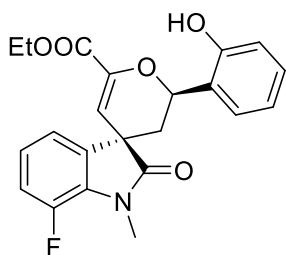

**9l**

White solid; mp 92–93 °C; 92% yield (both diastereomers), 94:6 *dr*, 94% *ee* [Daicel Chiralcel AD-H, hexanes/*i*-PrOH = 90/10, flow rate: 1.0 mL  $\text{min}^{-1}$ ,  $\lambda = 254.4$  nm,  $t$  (major) = 26.956,  $t$  (minor) = 9.556];  $[\alpha]_{\text{D}}^{25} = -108.6$  ( $c$  0.14,  $\text{CHCl}_3$ );

$^1\text{H}$  NMR (400 MHz,  $\text{CDCl}_3$ )  $\delta$  7.24 – 7.01 (m, 6H), 6.87 (td,  $J = 7.5, 1.2$  Hz, 1H), 6.81 (dd,  $J = 8.2, 1.2$  Hz, 1H), 5.86 (d,

$J = 1.8$  Hz, 1H), 5.57 (dd,  $J = 12.4, 2.1$  Hz, 1H), 4.27 (q,  $J = 7.1$  Hz, 2H), 3.47 (d,  $J = 2.8$  Hz, 3H), 2.55 (dd,  $J = 13.8, 12.3$  Hz, 1H), 2.10 (dt,  $J = 13.8, 2.1$  Hz, 1H), 1.30 (t,  $J = 7.1$  Hz, 3H);  $^{19}\text{F}$  NMR (376 MHz,  $\text{CDCl}_3$ )  $\delta$  -135.8;  $^{13}\text{C}$  NMR (101 MHz,  $\text{CDCl}_3$ )  $\delta$  176.6, 161.5, 153.6, 148.6, 146.2, 135.2 (d,  $J = 3.0$  Hz), 129.1, 129.0 (d,  $J = 8.0$  Hz), 127.2 (d,  $J = 11.0$  Hz), 126.20, 123.7, 123.1 (d,  $J = 6.0$  Hz), 120.1, 119.8 (d,  $J = 4.0$  Hz), 116.4 (d,  $J = 19.0$  Hz), 116.3, 107.8, 72.7, 61.3, 47.3, 47.2, 36.3, 28.8, 28.8, 13.6; IR (KBr)  $\nu_{\text{max}}$ : 3363, 1716, 1695, 1644, 1628, 1598, 1477, 1457, 1367, 1296, 1240, 1173, 1131, 1119, 1086, 1056, 1019, 754, 733, 698  $\text{cm}^{-1}$ ; HRMS (ESI):  $m/z = 420.1226$  (calcd for  $\text{C}_{22}\text{H}_{20}\text{FNO}_5 + \text{Na}^+ = 420.1218$ ).

**Ethyl (2'R,3R)-2'-(2-hydroxy-5-methylphenyl)-1-methyl-2-oxo-2',3'-dihydro spiro[indoline-3,4'-pyran]-6'-carboxylate 9m**

White solid; mp 231–232 °C; 60% yield (both diastereomers), 99:1 *dr*, 85% *ee* [Daicel Chiralcel AD-H, hexanes/*i*-PrOH = 80/20, flow rate: 1.0 mL  $\text{min}^{-1}$ ,  $\lambda = 254.4$  nm,  $t$  (major) = 19.636,  $t$  (minor) = 12.410];  $[\alpha]_{\text{D}}^{25} = -75.0$  ( $c$  0.14,  $\text{CHCl}_3$ );  $^1\text{H}$  NMR

(400 MHz, CDCl<sub>3</sub>)  $\delta$  7.46 – 7.31 (m, 2H), 7.12 (t,  $J$  = 7.6 Hz, 1H), 7.01 (s, 1H), 6.93 (dd,  $J$  = 17.1, 8.0 Hz, 2H), 6.73 (d,  $J$  = 8.2 Hz, 1H), 6.62 (s, 1H), 5.87 (s, 1H), 5.56 (d,

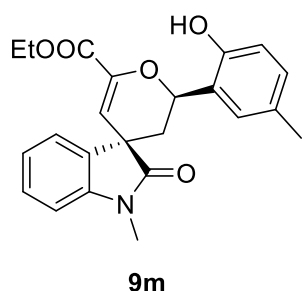

$J$  = 12.2 Hz, 1H), 4.26 (q,  $J$  = 7.1 Hz, 2H), 3.25 (s, 3H), 2.56 (t,  $J$  = 13.0 Hz, 1H), 2.23 (s, 3H), 2.08 (d,  $J$  = 13.8 Hz, 1H), 1.30 (t,  $J$  = 7.1 Hz, 3H); <sup>13</sup>C NMR (101 MHz, CDCl<sub>3</sub>)  $\delta$  177.0, 161.6, 151.4, 146.0, 142.3, 132.6, 129.5, 129.1, 128.4, 126.7, 124.0, 123.5, 122.7, 116.3, 108.4, 108.1, 73.08, 61.2, 47.1, 36.3, 26.3, 20.0, 13.6; IR (KBr)  $\nu_{\text{max}}$ :

3239, 2925, 1734, 1693, 1610, 1489, 1374, 1353, 1273, 1241, 1188, 1176, 1122, 1108, 1088, 1019, 817, 766, 738, 689, 644 cm<sup>-1</sup>; HRMS (ESI):  $m/z$  = 416.1472 (calcd for C<sub>23</sub>H<sub>23</sub>NO<sub>5</sub>+Na<sup>+</sup> = 416.1468).

**Ethyl (2*R*,3*R*)-2'-((5-(tert-butyl)-2-hydroxyphenyl)-2-oxo-2',3'-dihydrospiro[indoline-3,4'-pyran]-6'-carboxylate)-1-methyl-2-oxo-2',3'-dihydrospiro[indoline-3,4'-pyran]-6'-carboxylate **9n****

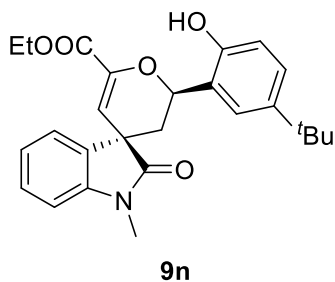

White solid; mp 93–94 °C; 92% yield (both diastereomers), 98:2 *dr*, 94% *ee* [Daicel Chiralcel AD-H, hexanes/*i*-PrOH = 80/20, flow rate: 1.0 mL min<sup>-1</sup>,  $\lambda$  = 254.4 nm,  $t$  (major) = 29.446,  $t$  (minor) = 7.340];  $[\alpha]_{\text{D}}^{25}$  = -126.3 ( $c$  0.27, CHCl<sub>3</sub>); <sup>1</sup>H NMR (400 MHz, CDCl<sub>3</sub>)  $\delta$  7.42 (d,  $J$  = 7.5 Hz, 1H), 7.36 (t,  $J$  = 7.8 Hz, 1H), 7.23 – 7.09 (m, 3H), 6.92 (d,

$J$  = 7.9 Hz, 1H), 6.79 (d,  $J$  = 8.4 Hz, 1H), 6.67 (s, 1H), 5.92 – 5.84 (m, 1H), 5.66 – 5.55 (m, 1H), 4.26 (qt,  $J$  = 7.4, 3.6 Hz, 2H), 3.27 (s, 3H), 2.61 (t,  $J$  = 13.0 Hz, 1H), 2.13 (d,  $J$  = 13.7 Hz, 1H), 1.30 (t,  $J$  = 7.2 Hz, 3H), 1.25 (s, 9H); <sup>13</sup>C NMR (101 MHz, CDCl<sub>3</sub>)  $\delta$  177.1, 161.6, 151.5, 146.02, 142.7, 142.3, 132.6, 128.5, 126.0, 124.1, 123.1, 122.9, 122.7, 116.0, 108.3, 108.1, 73.3, 61.2, 47.1, 36.0, 33.7, 31.0, 26.3, 13.6; IR (KBr)  $\nu_{\text{max}}$ : 2961, 1716, 1646, 1610, 1490, 1469, 1422, 1371, 1295, 1272, 1190, 1170, 1111, 1086, 988, 919, 820, 751, 689, 668 cm<sup>-1</sup>; HRMS (ESI):  $m/z$  = 436.2115 (calcd for C<sub>26</sub>H<sub>29</sub>NO<sub>5</sub>+H<sup>+</sup> = 436.2118).

**Ethyl (2*R*,3*R*)-2'-((5-chloro-2-hydroxyphenyl)-2-oxo-2',3'-dihydrospiro[indoline-3,4'-pyran]-6'-carboxylate)-1-methyl-2-oxo-2',3'-dihydrospiro[indoline-3,4'-pyran]-6'-carboxylate **9o****

White solid; mp 92–93 °C; 75% yield (both diastereomers), 97:3 *dr*, 88% *ee* [Daicel Chiralcel AD-H, hexanes/*i*-PrOH = 90/10, flow rate: 1.0 mL min<sup>-1</sup>, λ = 254.4 nm, t

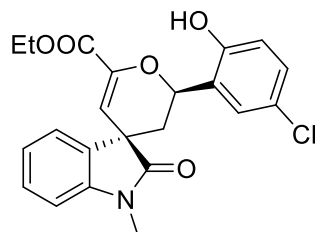

**9o**

(major) = 12.213, t (minor) = 9.915]; [α]<sub>D</sub><sup>25</sup> = -102.9 (*c* 0.28, CHCl<sub>3</sub>); <sup>1</sup>H NMR (400 MHz, CDCl<sub>3</sub>) δ 7.46 (s, 1H), 7.40 (d, *J* = 7.4 Hz, 1H), 7.38 – 7.31 (m, 1H), 7.20 (d, *J* = 2.7 Hz, 1H), 7.11 (t, *J* = 7.6 Hz, 1H), 6.99 (dd, *J* = 8.6, 2.6 Hz, 1H), 6.90 (d, *J* = 7.8 Hz, 1H), 6.66 (d, *J* = 8.7 Hz, 1H), 5.87 (d, *J* = 1.6 Hz, 1H), 5.60 (dd, *J* = 12.4, 2.0 Hz, 1H), 4.26 (q, *J* = 7.1 Hz, 2H), 3.25 (s, 3H), 2.54 (t, *J* = 13.0 Hz, 1H), 2.01 (dt, *J* = 13.7, 2.1 Hz, 1H), 1.29 (t, *J* = 7.1 Hz, 3H); <sup>13</sup>C NMR (101 MHz, CDCl<sub>3</sub>) δ 177.1, 162.1, 152.3, 145.9, 142.2, 132.3, 128.8, 128.5, 126.2, 125.2, 124.5, 124.0, 122.8, 117.4, 108.5, 108.2, 71.2, 61.5, 47.1, 35.8, 26.3, 13.6; IR (KBr) ν<sub>max</sub>: 2933, 1717, 1686, 1609, 1491, 1470, 1372, 1349, 1260, 1195, 1109, 1091, 1053, 1021, 815, 752 cm<sup>-1</sup>; HRMS (ESI): *m/z* = 414.1091 (calcd for C<sub>22</sub>H<sub>20</sub>ClNO<sub>5</sub>+H<sup>+</sup> = 414.1103).

**Ethyl (2'*R*,3*R*)-2'-(2-hydroxy-4-methylphenyl)-1-methyl-2-oxo-2',3'-dihydro spiro[indoline-3,4'-pyran]-6'-carboxylate **9p****

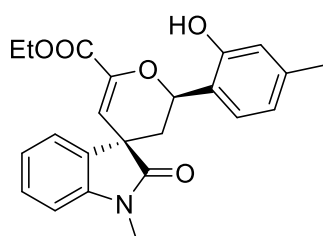

**9p**

White solid; mp 89–90 °C; 92% yield (both diastereomers), 93:7 *dr*, 94% *ee* [Daicel Chiralcel AD-H, hexanes/*i*-PrOH = 75/25, flow rate: 1.0 mL min<sup>-1</sup>, λ = 254.4 nm, t (major) = 15.510, t (minor) = 22.949]; [α]<sub>D</sub><sup>25</sup> = -101.9 (*c* 0.16, CHCl<sub>3</sub>); <sup>1</sup>H NMR (400 MHz, CDCl<sub>3</sub>) δ 7.41 (dd, *J* = 7.6, 1.2 Hz, 1H), 7.34 (td, *J* = 7.8, 1.2 Hz, 1H), 7.15 – 7.05 (m, 2H), 7.04 – 6.98 (m, 1H), 6.90 (d, *J* = 7.7 Hz, 1H), 6.64 (dd, *J* = 7.9, 1.6 Hz, 1H), 6.59 (d, *J* = 1.6 Hz, 1H), 5.86 (d, *J* = 1.8 Hz, 1H), 5.61 (dd, *J* = 12.3, 1.9 Hz, 1H), 4.25 (qd, *J* = 7.1, 1.4 Hz, 2H), 3.25 (s, 3H), 2.61 (dd, *J* = 13.7, 12.4 Hz, 1H), 2.20 (s, 3H), 2.04 (dd, *J* = 13.7, 4.0 Hz, 1H), 1.29 (t, *J* = 7.1 Hz, 3H); <sup>13</sup>C NMR (101 MHz, CDCl<sub>3</sub>) δ 177.2, 161.9, 153.7, 146.1, 142.3, 139.2, 132.6, 128.4, 125.9, 124.1, 122.7, 120.7, 120.6, 116.9, 108.3, 108.1, 72.4, 61.2, 47.2, 35.9, 26.3, 20.6, 13.6; IR (KBr) ν<sub>max</sub>: 2977, 1716, 1686, 1646, 1610, 1490, 1470, 1419, 1371, 1296, 1243, 1132, 1107, 1087, 1018, 947,



806, 753, 741, 729, 687  $\text{cm}^{-1}$ ; HRMS (ESI):  $m/z = 394.1649$  (calcd for  $\text{C}_{23}\text{H}_{23}\text{NO}_5 + \text{H}^+ = 394.1649$ ).

**Ethyl (2'*R*,3*R*)-2'-(2-hydroxy-4-methoxyphenyl)-1-methyl-2-oxo-2',3'-dihydro spiro[indoline-3,4'-pyran]-6'-carboxylate 9q**

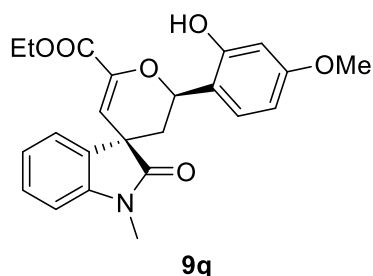

White solid; mp 156–157  $^{\circ}\text{C}$ ; 91% yield (both diastereomers), 98:2 *dr*, 91% *ee* [Daicel Chiralcel IA-H, hexanes/*i*-PrOH = 80/20, flow rate: 1.0  $\text{mL min}^{-1}$ ,  $\lambda = 254.4 \text{ nm}$ ,  $t$  (major) = 45.899,  $t$  (minor) = 29.764];  $[\alpha]_{\text{D}}^{25} = -126.5$  ( $c$  0.33,  $\text{CHCl}_3$ );  $^1\text{H NMR}$  (400 MHz,  $\text{CDCl}_3$ )  $\delta$  7.45 – 7.31 (m, 2H), 7.11 (dd,  $J = 14.6, 7.0 \text{ Hz}$ , 2H), 7.02 (d,  $J = 9.2 \text{ Hz}$ , 1H), 6.91 (d,  $J = 7.8 \text{ Hz}$ , 1H), 6.40 (s, 2H), 5.88 (d,  $J = 1.7 \text{ Hz}$ , 1H), 5.58 – 5.51 (m, 1H), 4.27 (q,  $J = 7.1 \text{ Hz}$ , 2H), 3.73 (s, 3H), 3.27 (s, 3H), 2.65 (t,  $J = 13.1 \text{ Hz}$ , 1H), 2.13 – 2.03 (m, 1H), 1.30 (t,  $J = 7.1 \text{ Hz}$ , 3H);  $^{13}\text{C NMR}$  (101 MHz,  $\text{CDCl}_3$ )  $\delta$  177.0, 161.7, 160.3, 155.4, 145.9, 142.3, 132.6, 128.5, 126.9, 124.0, 122.6, 116.0, 108.5, 108.1, 105.8, 102.1, 73.0, 61.3, 54.8, 47.1, 36.0, 26.3, 13.6; IR (KBr)  $\nu_{\text{max}}$ : 3412, 1734, 1705, 1610, 1520, 1491, 1472, 1423, 1372, 1306, 1286, 1256, 1234, 1205, 1171, 1110, 1100, 1088, 1036, 1019, 959, 837, 810, 770, 687  $\text{cm}^{-1}$ ; HRMS (ESI):  $m/z = 410.1590$  (calcd for  $\text{C}_{23}\text{H}_{23}\text{NO}_6 + \text{H}^+ = 410.1598$ ).

**Ethyl(2'*R*,3*R*)-2'-(2-hydroxy-3-methoxyphenyl)-1-methyl-2-oxo-2',3'-dihydro spiro[indoline-3,4'-pyran]-6'-carboxylate 9r**

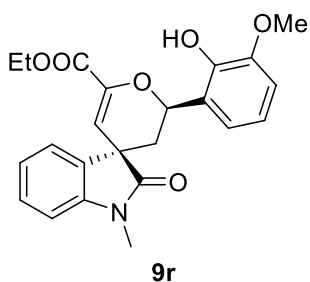

White solid; mp 215–216  $^{\circ}\text{C}$ ; 92% yield, 99:1 *dr*, 92% *ee* [Daicel Chiralcel AD-H, hexanes/*i*-PrOH = 80/20, flow rate: 1.0  $\text{mL min}^{-1}$ ,  $\lambda = 254.4 \text{ nm}$ ,  $t$  (major) = 18.934,  $t$  (minor) = 45.530];  $[\alpha]_{\text{D}}^{25} = -127.8$  ( $c$  0.32,  $\text{CHCl}_3$ );  $^1\text{H NMR}$  (400 MHz,  $\text{CDCl}_3$ )  $\delta$  7.52 – 7.44 (m, 1H), 7.34 (td,  $J = 7.8, 1.2 \text{ Hz}$ , 1H), 7.21 – 7.09 (m, 2H), 6.95 (s, 1H), 6.89 (dt,  $J = 8.0, 4.1 \text{ Hz}$ , 2H), 6.80 (dd,  $J = 8.1, 1.5 \text{ Hz}$ , 1H), 5.84 (d,  $J = 1.8 \text{ Hz}$ , 1H), 5.72 (dd,  $J = 12.1, 2.1 \text{ Hz}$ , 1H), 4.25 (qd,  $J = 7.2, 2.8 \text{ Hz}$ , 2H), 3.84 (s, 3H), 3.24 (s, 3H), 2.39 (dd,  $J = 13.7, 12.1 \text{ Hz}$ , 1H), 2.06 (dt,  $J = 13.9, 2.1 \text{ Hz}$ , 1H), 1.28 (t,  $J = 7.1 \text{ Hz}$ , 3H);  $^{13}\text{C NMR}$  (101 MHz,  $\text{CDCl}_3$ )  $\delta$  177.26, 161.81, 146.8, 145.6, 142.3, 141.8, 132.8,

128.2, 125.0, 124.1, 122.6, 119.6, 118.4, 109.7, 107.9, 107.6, 70.1, 60.9, 55.6, 47.3, 36.6, 26.2, 13.7; IR (KBr)  $\nu_{\max}$ : 3376, 1725, 1699, 1609, 1485, 1470, 1374, 1351, 1278, 1250, 1220, 1176, 1139, 1121, 1114, 1093, 1075, 1045, 1020, 969, 779, 755, 740, 730, 687  $\text{cm}^{-1}$ ; HRMS (ESI):  $m/z = 410.1590$  (calcd for  $\text{C}_{23}\text{H}_{23}\text{NO}_6 + \text{H}^+$  = 410.1598).

**Ethyl (2'*R*,3*R*)-2'-(2-hydroxy-3-methylphenyl)-1-methyl-2-oxo-2',3'-dihydro spiro[indoline-3,4'-pyran]-6'-carboxylate **9s****

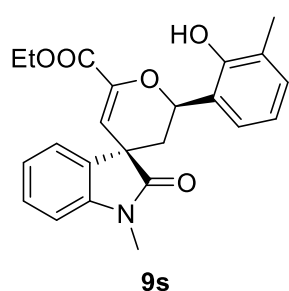

White solid; mp 168–169 °C; 81% yield, 99:1 *dr*, 95% *ee* [Daicel Chiralcel AD-H, hexanes/*i*-PrOH = 95/5, flow rate: 1.0 mL min<sup>-1</sup>,  $\lambda = 254.4$  nm,  $t$  (major) = 60.586,  $t$  (minor) = 55.470];  $[\alpha]_{\text{D}}^{25} = -126.9$  ( $c$  0.28,  $\text{CHCl}_3$ ); <sup>1</sup>H NMR (400 MHz,  $\text{CDCl}_3$ )  $\delta$  7.44 – 7.31 (m, 2H), 7.16 – 7.05 (m, 2H), 7.01 –

6.95 (m, 1H), 6.91 (d,  $J = 7.8$  Hz, 1H), 6.83 – 6.72 (m, 2H), 5.90 (d,  $J = 1.7$  Hz, 1H), 5.56 (dd,  $J = 12.4, 2.1$  Hz, 1H), 4.27 (q,  $J = 7.1$  Hz, 2H), 3.26 (s, 3H), 2.63 (dd,  $J = 13.7, 12.4$  Hz, 1H), 2.25 (s, 3H), 2.10 (dt,  $J = 13.8, 2.0$  Hz, 1H), 1.31 (t,  $J = 7.1$  Hz, 3H); <sup>13</sup>C NMR (101 MHz,  $\text{CDCl}_3$ )  $\delta$  176.8, 161.4, 152.4, 145.8, 142.3, 132.5, 130.5, 128.5, 125.3, 123.9, 123.8, 123.0, 122.6, 119.6, 108.8, 108.1, 74.2, 61.2, 47.0, 36.0, 26.3, 15.5, 13.7; IR (KBr)  $\nu_{\max}$ : 3214, 1731, 1716, 1683, 1607, 1470, 1372, 1325, 1296, 1269, 1252, 1243, 1205, 1189, 1168, 1107, 1082, 1043, 1015, 963, 845, 787, 761, 687  $\text{cm}^{-1}$ ; HRMS (ESI):  $m/z = 416.1478$  (calcd for  $\text{C}_{23}\text{H}_{23}\text{NO}_5 + \text{Na}^+$  = 416.1468).

**Ethyl (2'*R*,3*R*)-2'-(2-hydroxyphenyl)-1,3'-dimethyl-2-oxo-2',3'-dihydro spiro[indoline-3,4'-pyran]-6'-carboxylate **9t****

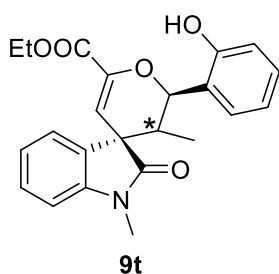

White solid; mp 87–88 °C; 78% yield (both diastereomers), 92:8 *dr*, 67% *ee* [Daicel Chiralcel OD-H, hexanes/*i*-PrOH = 95/5, flow rate: 1.0 mL min<sup>-1</sup>,  $\lambda = 254.4$  nm,  $t$  (major) = 78.289,  $t$  (minor) = 90.193];  $[\alpha]_{\text{D}}^{25} = -35.0$  ( $c$  0.14,  $\text{CHCl}_3$ ); <sup>1</sup>H NMR (400 MHz,  $\text{CDCl}_3$ )  $\delta$  7.40 (t,  $J = 8.0$  Hz, 2H), 7.31 –

7.24 (m, 2H), 7.19 (td,  $J = 7.6, 2.4$  Hz, 2H), 6.99 – 6.90 (m, 2H), 6.86 (d,  $J = 8.2$  Hz, 1H), 5.92 (s, 1H), 5.46 (d,  $J = 11.1$  Hz, 1H), 4.36 – 4.18 (m, 2H), 3.30 (d,  $J = 10.4$  Hz, 3H), 1.34 (s, 4H), 0.34 (d,  $J = 7.0$  Hz, 3H); <sup>13</sup>C NMR (101 MHz,  $\text{CDCl}_3$ )  $\delta$  177.2,

162.0, 154.1, 145.7, 143.0, 129.3, 129.1, 128.4, 128.2, 125.0, 122.9, 122.6, 119.9, 116.1, 108.9, 107.9, 61.1, 51.9, 38.3, 26.2, 13.6, 10.8; IR (KBr)  $\nu_{\max}$ : 2983, 1716, 1685, 1652, 1609, 1490, 1470, 1458, 1372, 1350, 1273, 1208, 1121, 1087, 1072, 752, 688  $\text{cm}^{-1}$ ; HRMS (ESI):  $m/z = 394.1648$  (calcd for  $\text{C}_{23}\text{H}_{23}\text{NO}_5 + \text{H}^+ = 394.1649$ ).

**Ethyl-(*S,E*)-3-(3-(2-(2-hydroxyphenyl)prop-1-en-1-yl)-1-methyl-2-oxoindolin-3-yl)-2-oxopropanoate **9v****

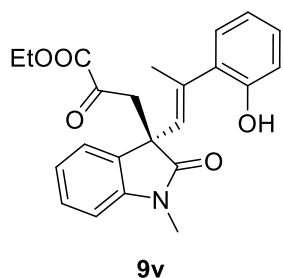

White solid; mp 78–79 °C; 88% yield, 99:1 *E/Z*, 0% *ee* [Daicel Chiralcel AD-H, hexanes/*i*-PrOH = 80/20, flow rate: 1.0  $\text{mL min}^{-1}$ ,  $\lambda = 254.4 \text{ nm}$ ,  $t$  (major) = 8.115,  $t$  (minor) = 12.871];  $^1\text{H NMR}$  (400 MHz,  $\text{CDCl}_3$ )  $\delta$  7.32 (t,  $J = 7.4 \text{ Hz}$ , 2H), 7.14 – 7.04 (m, 2H), 7.03 – 6.94 (m, 2H), 6.90 (dd,  $J = 8.0, 4.9 \text{ Hz}$ , 2H), 6.82 (t,  $J = 7.5 \text{ Hz}$ , 1H), 5.79 (s, 1H), 4.23 (q,  $J = 7.1 \text{ Hz}$ , 2H), 3.82 (d,  $J = 18.3 \text{ Hz}$ , 1H), 3.40 – 3.19 (m, 4H), 1.46 (s, 3H), 1.30 (t,  $J = 7.2 \text{ Hz}$ , 3H);  $^{13}\text{C NMR}$  (101 MHz,  $\text{CDCl}_3$ )  $\delta$  190.4, 177.1, 159.5, 151.8, 143.2, 137.2, 130.9, 130.3, 128.7, 128.3, 128.2, 127.8, 123.8, 122.8, 119.5, 115.6, 108.1, 62.3, 49.9, 46.9, 26.2, 17.9, 13.4; IR (KBr)  $\nu_{\max}$ : 2926, 1718, 1686, 1609, 1490, 1470, 1447, 1373, 1261, 1090, 1053, 1022, 836, 751  $\text{cm}^{-1}$ ; HRMS (ESI):  $m/z = 394.1646$  (calcd for  $\text{C}_{23}\text{H}_{23}\text{NO}_5 + \text{H}^+ = 394.1649$ ).

**Ethyl-(*S,E*)-3-(3-(2-(2-hydroxyphenyl)-2-phenylvinyl)-1-methyl-2-oxoindolin-3-yl)-2-oxopropanoate **9w****

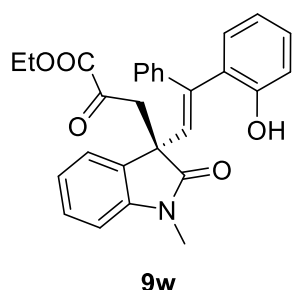

White solid; mp 94–95 °C; 65% yield, 90:10 *E/Z*, 60% *ee* [Daicel Chiralcel AD-H, hexanes/*i*-PrOH = 80/20, flow rate: 1.0  $\text{mL min}^{-1}$ ,  $\lambda = 254.4 \text{ nm}$ ,  $t$  (major) = 9.175,  $t$  (minor) = 12.384];  $[\alpha]_{\text{D}}^{25} = +81.2$  ( $c$  0.17,  $\text{CHCl}_3$ );  $^1\text{H NMR}$  (400 MHz,  $\text{CDCl}_3$ )  $\delta$  7.27 – 7.24 (m, 1H), 7.17 (td,  $J = 7.8, 1.3 \text{ Hz}$ , 1H), 7.13 – 7.07 (m, 1H), 7.07 – 6.89 (m, 5H), 6.80 (dd,  $J = 7.7, 1.8 \text{ Hz}$ , 2H), 6.73 (dd,  $J = 7.3, 1.2 \text{ Hz}$ , 1H), 6.70 – 6.66 (m, 2H), 6.54 (d,  $J = 7.8 \text{ Hz}$ , 1H), 6.26 (s, 1H), 4.22 (qd,  $J = 7.2, 1.5 \text{ Hz}$ , 2H), 3.76 (d,  $J = 18.0 \text{ Hz}$ , 1H), 3.25 (dd,  $J = 17.9, 1.4 \text{ Hz}$ , 1H), 2.84 (s, 3H), 1.29 (t,  $J = 7.1 \text{ Hz}$ , 3H);  $^{13}\text{C NMR}$  (101 MHz,  $\text{CDCl}_3$ )  $\delta$  190.9, 176.5, 159.4, 152.6, 142.7, 141.6, 137.9, 131.7, 129.8, 129.6, 128.6,

128.5, 128.4, 128.0, 127.0, 126.9, 123.8, 122.4, 119.4, 116.0, 107.9, 99.5, 62.3, 50.6, 46.2, 25.7, 13.4; IR (KBr)  $\nu_{\max}$ : 3186, 1744, 1718, 1685, 1610, 1493, 1470, 1446, 1391, 1350, 1253, 1234, 1055, 830, 751, 736, 700  $\text{cm}^{-1}$ ; HRMS (ESI):  $m/z = 456.1812$  (calcd for  $\text{C}_{28}\text{H}_{25}\text{NO}_5 + \text{H}^+ = 456.1805$ ).

## 2.6 General procedure for the preparation of 12

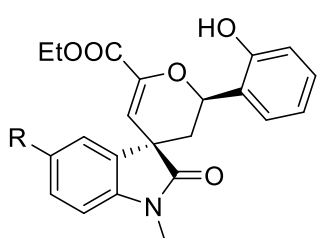

R = H: **9a**, 98:2 *dr*, 93% *ee*  
R = Br: **9i**, 99:1 *dr*, 99% *ee*

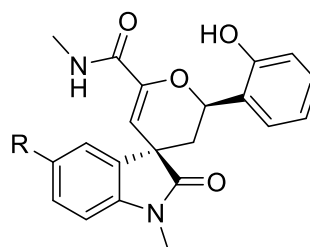

R = H: **12a**, 92% yield, 99:1 *dr*, 93% *ee*  
R = Br: **12b**, 90% yield, 96:4 *dr*, 99% *ee*

**9a** or **9i** (0.1 mmol) was added into a vessel, methylamine alcohol solution (2 mL) was added *via* syringe and the system was stirred at room temperature for 12 h. Then the solvent was evaporated under reduced pressure and the residue was purified by column chromatography on silica gel with EtOAc/petroleum ether (1/1) as eluent to give **12a** or **12b** as a white solid.

### (2'*R*,3*R*)-2'-(2-Hydroxyphenyl)-*N*,1-dimethyl-2-oxo-2',3'-dihydrospiro[indoline-3,4'-pyran]-6'-carboxamide **12a**

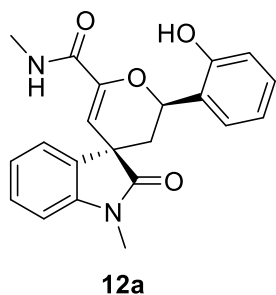

White solid; mp 151–152 °C; 92% yield, 99:1 *dr*, 93% *ee*  
[Daicel Chiralcel AD-H, hexanes/*i*-PrOH = 80/20, flow rate: 1.0 mL  $\text{min}^{-1}$ ,  $\lambda = 254.4$  nm,  $t$  (major) = 10.272,  $t$  (minor) = 8.579];  $[\alpha]_{\text{D}}^{25} = -105.4$  ( $c$  0.21, EtOH);  $^1\text{H}$  NMR (400 MHz,  $\text{CDCl}_3$ )  $\delta$  8.13 (s, 1H), 7.34 – 7.11 (m, 3H), 7.07 – 6.88 (m, 2H), 6.86 – 6.63 (m, 4H), 5.68 (s, 1H), 5.59 (d,  $J = 12.1$  Hz,

1H), 3.10 (s, 3H), 2.68 (d,  $J = 4.9$  Hz, 3H), 2.38 (t,  $J = 13.0$  Hz, 1H), 1.86 (d,  $J = 13.7$  Hz, 1H);  $^{13}\text{C}$  NMR (100 MHz,  $\text{CDCl}_3$ )  $\delta$  177.8, 162.3, 153.4, 148.4, 142.0, 132.9, 128.9, 128.1, 126.3, 125.2, 124.0, 122.7, 119.5, 115.5, 108.0, 104.1, 70.7, 47.4, 36.6, 26.3, 25.6; IR (KBr)  $\nu_{\max}$ : 3276, 2961, 2925, 2301, 1698, 1645, 1608, 1540, 1490, 1457, 1372, 1351, 1291, 1262, 1127, 1039, 1020, 979, 750, 686, 624, 612  $\text{cm}^{-1}$ ; HRMS (ESI):  $m/z = 387.1303$  (calcd for  $\text{C}_{21}\text{H}_{20}\text{N}_2\text{O}_4 + \text{Na}^+ = 387.1315$ ).

**(2'*R*,3*R*)-5-Bromo-2'-(2-hydroxyphenyl)-*N*,1-dimethyl-2-oxo-2',3'-dihydrospiro [indoline-3,4'-pyran]-6'-carboxamide **12b****

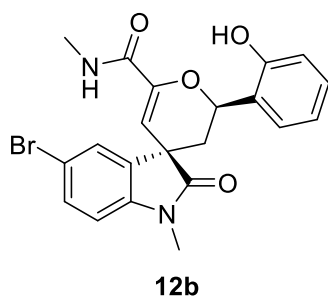

White solid; mp 283–284 °C; 90% yield (both diastereomers), 96:4 *dr*, 99% *ee* [Daicel Chiralcel AD-H, hexanes/*i*-PrOH = 80/20, flow rate: 1.0 mL min<sup>-1</sup>, λ = 254.4 nm, t (major) = 16.811, t (minor) = 8.168]; [α]<sub>D</sub><sup>25</sup> = -200.9 (*c* 0.11, EtOH); <sup>1</sup>H NMR (400 MHz, DMSO-*d*<sub>6</sub>) δ 9.68 (s, 1H), 7.94 (q, *J* = 4.7 Hz, 1H), 7.64 (d, *J* = 2.0 Hz, 1H), 7.54 (ddd, *J* = 17.2, 8.0, 1.9 Hz, 2H), 7.16 (td, *J* = 7.7, 1.8 Hz, 1H), 7.07 (d, *J* = 8.3 Hz, 1H), 6.89 (td, *J* = 7.5, 1.1 Hz, 1H), 6.80 (d, *J* = 8.0 Hz, 1H), 5.57 (dd, *J* = 8.8, 5.1 Hz, 1H), 5.50 (s, 1H), 3.15 (s, 3H), 2.69 (d, *J* = 4.7 Hz, 3H), 2.08 – 1.99 (m, 2H); <sup>13</sup>C NMR (100 MHz, DMSO-*d*<sub>6</sub>) δ 176.6, 161.4, 153.6, 149.7, 142.2, 135.5, 131.1, 128.7, 126.8, 126.6, 126.0, 119.2, 115.0, 114.2, 110.9, 102.8, 70.6, 47.2, 37.0, 26.6, 25.8; IR (KBr) ν<sub>max</sub>: 3417, 2924, 1724, 1643, 1605, 1545, 1506, 1456, 1359, 1343, 1274, 1256, 1173, 1134, 1081, 1057, 1036, 1015, 976, 863, 812, 768, 614 cm<sup>-1</sup>; HRMS (ESI): *m/z* = 465.0413 (calcd for C<sub>21</sub>H<sub>19</sub>BrN<sub>2</sub>O<sub>4</sub>+Na<sup>+</sup> = 465.0420).

**2.7 Procedure for the preparation of **13****

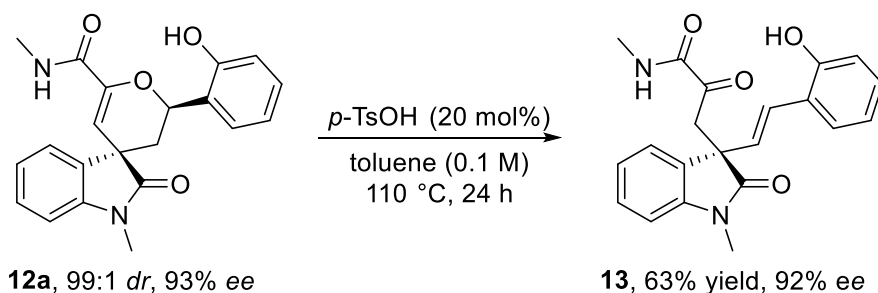

Under N<sub>2</sub> atmosphere, **12a** (0.1 mmol) was added into a vessel, anhydrous toluene (2 mL) was added *via* syringe and the system was stirred at 110 °C for 24 h. Then the solvent was evaporated under reduced pressure and the residue was purified by column chromatography on silica gel with EtOAc/petroleum ether (1/1) as eluent to give **13** as a white solid.

**(*S,E*)-3-(3-(2-Hydroxystyryl)-1-methyl-2-oxoindolin-3-yl)-*N*-methyl-2-oxopropan**

## amide 13

White solid; mp 120–121 °C; 63% yield, 92% *ee* [Daicel Chiralcel AD-H, hexanes/*i*-PrOH = 80/20, flow rate: 1.0 mL min<sup>-1</sup>, λ = 254.4

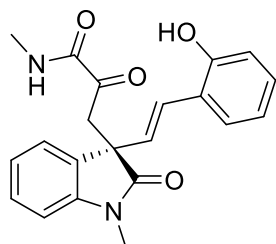

13

nm, *t* (major) = 26.367, *t* (minor) = 33.210]; [α]<sub>D</sub><sup>25</sup> = -108.7 (*c* 0.15, CHCl<sub>3</sub>); <sup>1</sup>H NMR (400 MHz, CDCl<sub>3</sub>) δ 7.32 (d, *J* = 7.6 Hz, 1H), 7.21 (t, *J* = 7.4 Hz, 2H), 7.06 (t, *J* = 7.7 Hz, 2H), 6.91 (d, *J* = 7.7 Hz, 1H), 6.82 – 6.69 (m, 3H), 6.64 (d, *J* = 16.5 Hz, 2H), 6.35 (d, *J* = 16.1 Hz, 1H), 4.06 (d, *J* = 19.1 Hz,

1H), 3.66 (d, *J* = 19.0 Hz, 1H), 3.29 (s, 3H), 2.78 (d, *J* = 5.2 Hz, 3H); <sup>13</sup>C NMR (101 MHz, CDCl<sub>3</sub>) δ 194.7, 177.5, 159.8, 153.2, 143.6, 129.7, 128.6, 128.4, 128.1, 127.4, 125.9, 123.2, 122.9, 122.2, 119.9, 115.6, 108.0, 51.5, 42.7, 26.2, 25.4; IR (KBr) ν<sub>max</sub>: 3416, 2914, 1726, 1653, 1612, 1536, 1511, 1453, 1327, 1323, 1277, 1286, 1144, 1131, 1036, 1014, 977, 812, 777, 618 cm<sup>-1</sup>; HRMS (ESI): *m/z* = 387.1306 (calcd for C<sub>21</sub>H<sub>20</sub>N<sub>2</sub>O<sub>4</sub>+Na<sup>+</sup> = 387.1315).

### 3. X-ray data of chiral 3c, 4j, 9i and 12b

#### 3.1 Crystal structure determination of compound 3c:

Crystal data and structure refinement for 3c:

|                             |                                                                                                                          |
|-----------------------------|--------------------------------------------------------------------------------------------------------------------------|
| Empirical formula           | C <sub>18</sub> H <sub>18</sub> BrNO <sub>5</sub>                                                                        |
| Formula weight              | 408.24                                                                                                                   |
| Temperature                 | 223(2) K                                                                                                                 |
| Wavelength                  | 0.71073 Å                                                                                                                |
| Crystal system, space group | orthorhombic, <i>P</i> 21 21 21                                                                                          |
| Unit cell dimensions        | <i>a</i> = 5.7193 (6) Å, α = 90 deg.<br><i>b</i> = 17.0464 (16) Å, β = 90 deg.<br><i>c</i> = 18.2530 (18) Å, γ = 90 deg. |
| Volume                      | 1779.5(3) Å <sup>3</sup>                                                                                                 |
| Z, Calculated density       | 4, 1.524 Mg/cm <sup>3</sup>                                                                                              |

|                                            |                                                   |
|--------------------------------------------|---------------------------------------------------|
| Absorption coefficient                     | 2.338 mm <sup>-1</sup>                            |
| F(000)                                     | 832                                               |
| Crystal size                               | 0.600 × 0.150 × 0.060 mm                          |
| Radiation                                  | MoKα (λ = 0.71073)                                |
| Theta range for data collection            | 2.531 to 27.462 deg.                              |
| Limiting indices                           | -4 ≤ h ≤ 7, -22 ≤ k ≤ 20, -23 ≤ l ≤ 10            |
| Reflections collected / unique             | 6271/3932 [R(int) = 0.0797]                       |
| Completeness to theta = 25.24              | 99.5%                                             |
| Data / restraints / parameters             | 3932/0/228                                        |
| Goodness-of-fit on F <sup>2</sup>          | 1.139                                             |
| Final R indexes [I ≥ 2σ (I)]               | R <sub>1</sub> = 0.0898, wR <sub>2</sub> = 0.2169 |
| Final R indexes [all data]                 | R <sub>1</sub> = 0.1554, wR <sub>2</sub> = 0.2537 |
| Largest diff. peak/hole / eÅ <sup>-3</sup> | 0.713 and -1.121                                  |
| Absolute structure parameter               | 0.080(19)                                         |

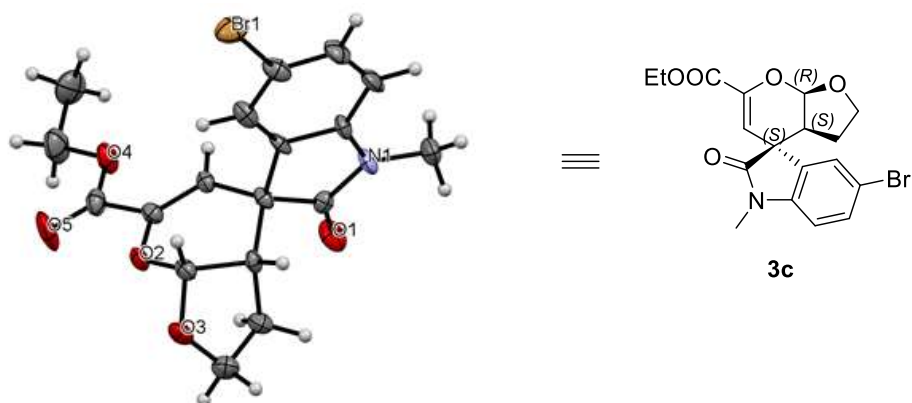

Figure S1. OPTEP drawing of **3c** (40% thermal ellipsoids)

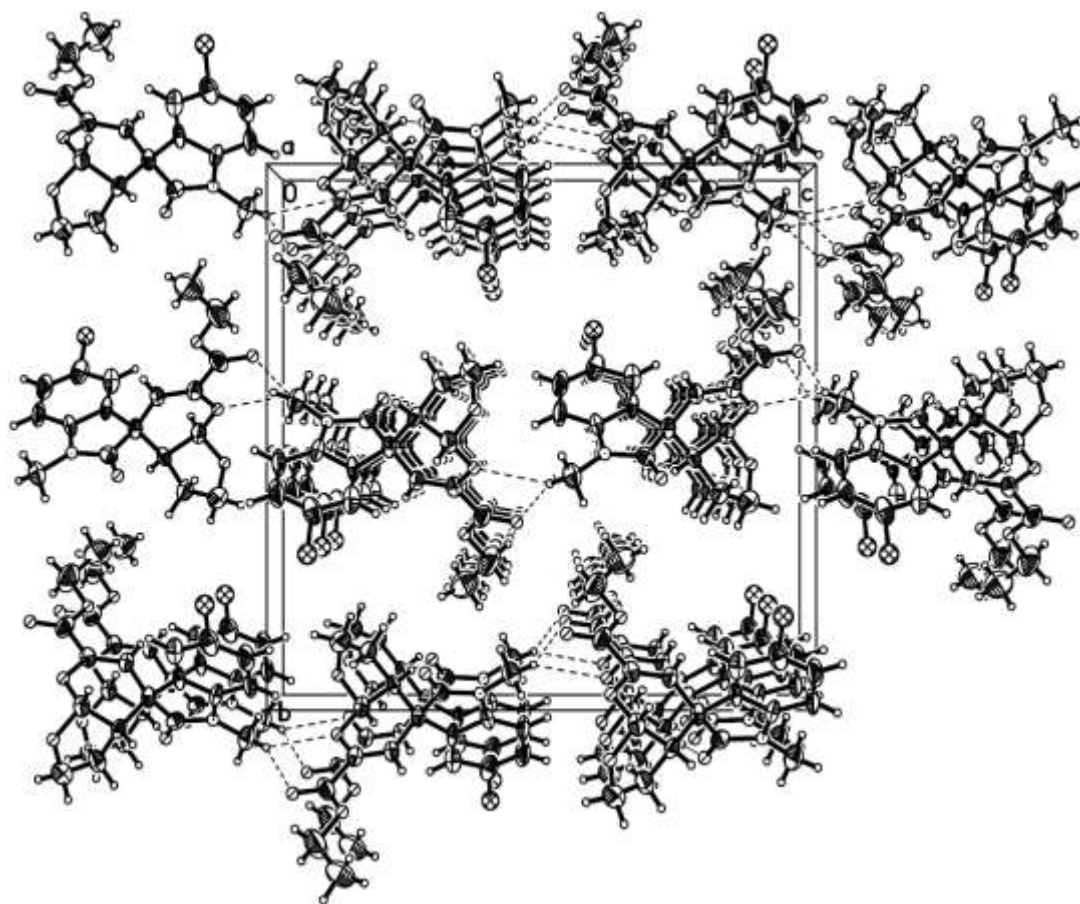

Figure S2. Packing of molecules in a unit cell of **3c**

The crystal was prepared from the solution of **3c** in DCM and *n*-hexane. CCDC 1550834 contains the supplementary crystallographic data for this paper. These data can be obtained free of charge from The Cambridge Crystallographic Data Centre via [www.ccdc.cam.ac.uk/data request/cif](http://www.ccdc.cam.ac.uk/data_request/cif).

### 3.2 Crystal structure determination of compound **4j**:

Crystal data and structure refinement for **4j**:

---

|                             |                                                   |
|-----------------------------|---------------------------------------------------|
| Empirical formula           | C <sub>19</sub> H <sub>20</sub> BrNO <sub>5</sub> |
| Formula weight              | 422.26                                            |
| Temperature                 | 120 K                                             |
| Wavelength                  | 0.71073 Å                                         |
| Crystal system, space group | orthorhombic, <i>P</i> 21 21 21                   |

---



|                                              |                                                                                                                                                                                     |
|----------------------------------------------|-------------------------------------------------------------------------------------------------------------------------------------------------------------------------------------|
| Unit cell dimensions                         | $a = 6.12950(10) \text{ \AA}$ , $\alpha = 90 \text{ deg.}$<br>$b = 15.9652(4) \text{ \AA}$ , $\beta = 90 \text{ deg.}$<br>$c = 18.5922(5) \text{ \AA}$ , $\gamma = 90 \text{ deg.}$ |
| Volume                                       | $1819.41(7) \text{ \AA}^3$                                                                                                                                                          |
| Z, Calculated density                        | 4, $1.542 \text{ Mg/cm}^3$                                                                                                                                                          |
| Absorption coefficient                       | $2.289 \text{ mm}^{-1}$                                                                                                                                                             |
| F(000)                                       | 864                                                                                                                                                                                 |
| Crystal size                                 | $0.34 \times 0.25 \times 0.22 \text{ mm}$                                                                                                                                           |
| Radiation                                    | MoK $\alpha$ ( $\lambda = 0.71073$ )                                                                                                                                                |
| Theta range for data collection              | 2.54 to 27.44 deg.                                                                                                                                                                  |
| Limiting indices                             | $-7 \leq h \leq 7$ , $-29 \leq k \leq 20$ , $-24 \leq l \leq 24$                                                                                                                    |
| Reflections collected / unique               | 28025/4160 [ $R(\text{int}) = 0.0696$ ]                                                                                                                                             |
| Completeness to theta = 25.242               | 99.7%                                                                                                                                                                               |
| Data / restraints / parameters               | 4160/0/237                                                                                                                                                                          |
| Goodness-of-fit on $F^2$                     | 1.197                                                                                                                                                                               |
| Final R indexes [ $I \geq 2\sigma(I)$ ]      | $R_1 = 0.0297$ , $wR_2 = 0.0606$                                                                                                                                                    |
| Final R indexes [all data]                   | $R_1 = 0.0391$ , $wR_2 = 0.0652$                                                                                                                                                    |
| Largest diff. peak/hole / $e\text{\AA}^{-3}$ | 0.304 and -0.329                                                                                                                                                                    |
| Absolute structure parameter                 | 0.032(6)                                                                                                                                                                            |

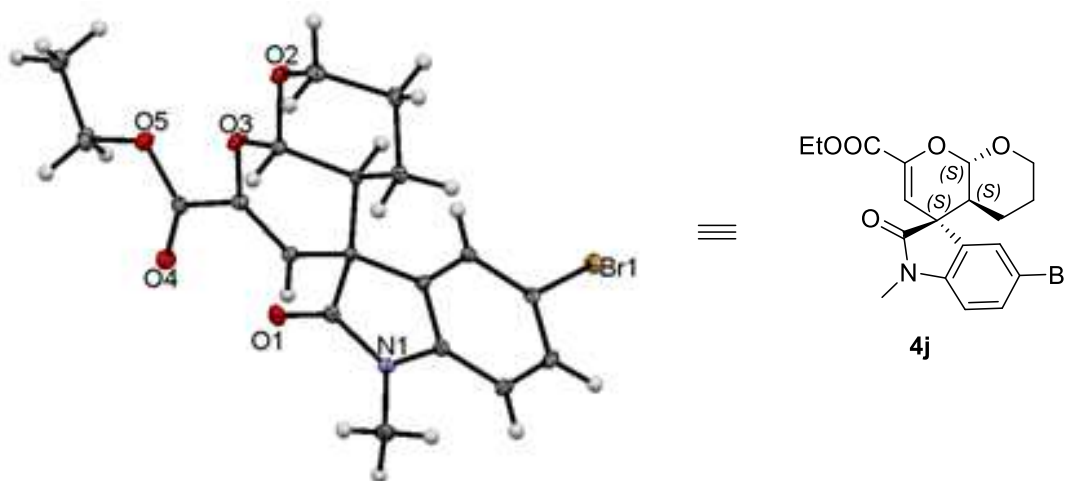

Figure S1. ORTEP drawing of **4j** (40% thermal ellipsoids)

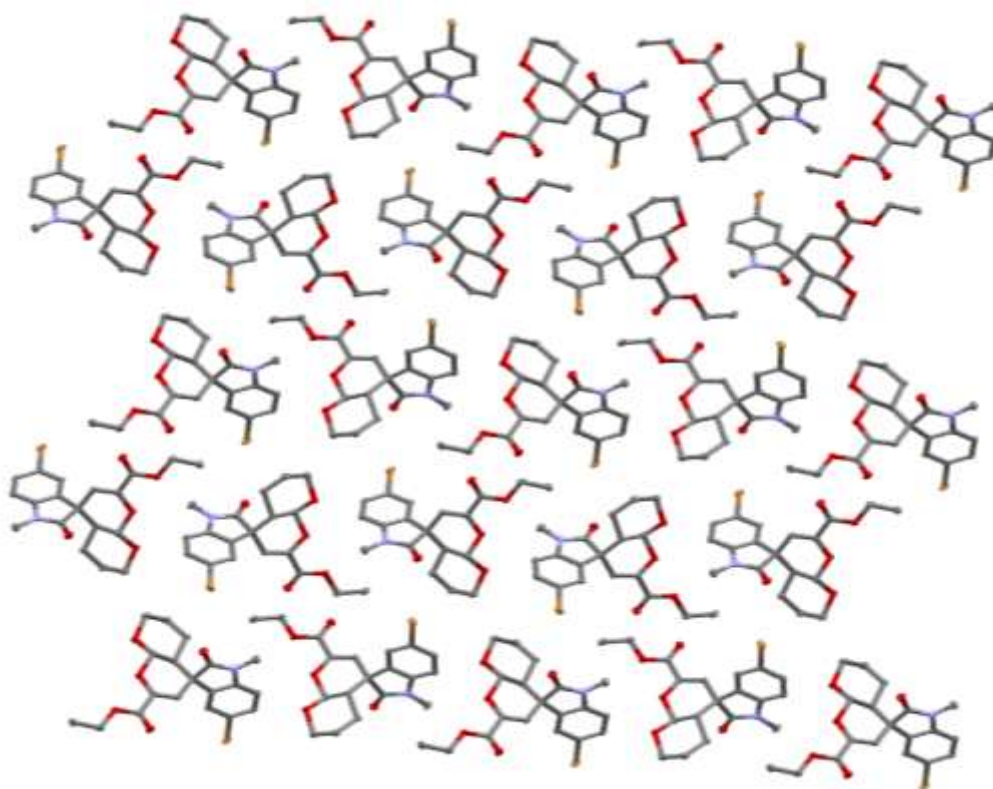

Figure S2. Packing of molecules in a unit cell of **4j**

The crystal was prepared from the solution of **4j** in DCM and *n*-hexane. CCDC 2040769 contains the supplementary crystallographic data for this paper. These data can be obtained free of charge from The Cambridge Crystallographic Data Centre via [www.ccdc.cam.ac.uk/data\\_request/cif](http://www.ccdc.cam.ac.uk/data_request/cif).

### 3.3 Crystal structure determination of compound **9i**:

Crystal data and structure refinement for **9i**:

---

|                             |                                                                                                                                   |
|-----------------------------|-----------------------------------------------------------------------------------------------------------------------------------|
| Empirical formula           | $C_{22}H_{20}BrNO_5 \cdot CHCl_3$ (M+CHCl <sub>3</sub> )                                                                          |
| Formula weight              | 577.66 (M+ CHCl <sub>3</sub> )                                                                                                    |
| Temperature                 | 293(2) K                                                                                                                          |
| Wavelength                  | 0.71073 Å                                                                                                                         |
| Crystal system, space group | monoclinic, P 21                                                                                                                  |
| Unit cell dimensions        | $a = 9.6151(4)$ Å, $\alpha = 90$ deg.<br>$b = 14.8507(5)$ Å, $\beta = 118.7867(12)$ deg.<br>$c = 9.7033(4)$ Å, $\gamma = 90$ deg. |

---

|                                            |                                                   |
|--------------------------------------------|---------------------------------------------------|
| Volume                                     | 1214.32(8) Å <sup>3</sup>                         |
| Z, Calculated density                      | 2, 1.580 Mg/cm <sup>3</sup>                       |
| Absorption coefficient                     | 2.058 mm <sup>-1</sup>                            |
| F(000)                                     | 584                                               |
| Crystal size                               | 0.25 x 0.23 x 0.20 mm                             |
| Radiation                                  | MoKα (λ = 0.71073)                                |
| Theta range for data collection            | 2.395 to 27.513 deg.                              |
| Limiting indices                           | -12 ≤ h ≤ 12, -19 ≤ k ≤ 19, -12 ≤ l ≤ 12          |
| Reflections collected / unique             | 19735/5578 [R(int) = 0.0334]                      |
| Completeness to theta = 27.51              | 99.7 %                                            |
| Absorption correction                      | Semi-empirical from equivalents                   |
| Refinement method                          | Full-matrix least-squares on F <sup>2</sup>       |
| Data / restraints / parameters             | 5486/1/301                                        |
| Goodness-of-fit on F <sup>2</sup>          | 1.030                                             |
| Final R indexes [I ≥ 2σ (I)]               | R <sub>1</sub> = 0.0297, wR <sub>2</sub> = 0.1018 |
| Final R indexes [all data]                 | R <sub>1</sub> = 0.0420, wR <sub>2</sub> = 0.0606 |
| Largest diff. peak/hole / eÅ <sup>-3</sup> | 0.968 and -0.901                                  |
| Absolute structure parameter               | 0.021(4)                                          |

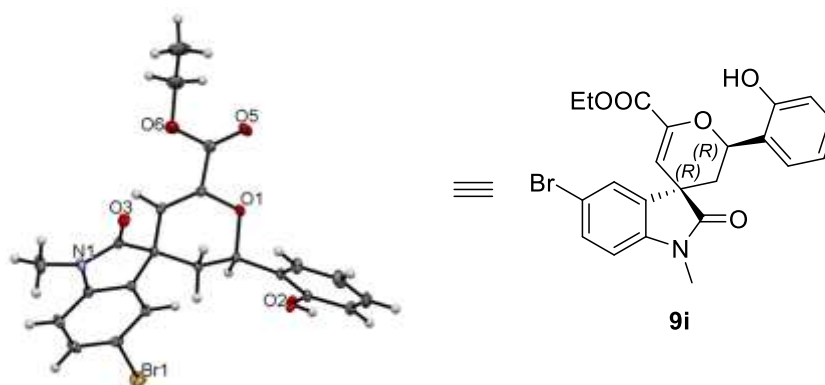

Figure S1. OPTEP drawing of **9i** (40% thermal ellipsoids)

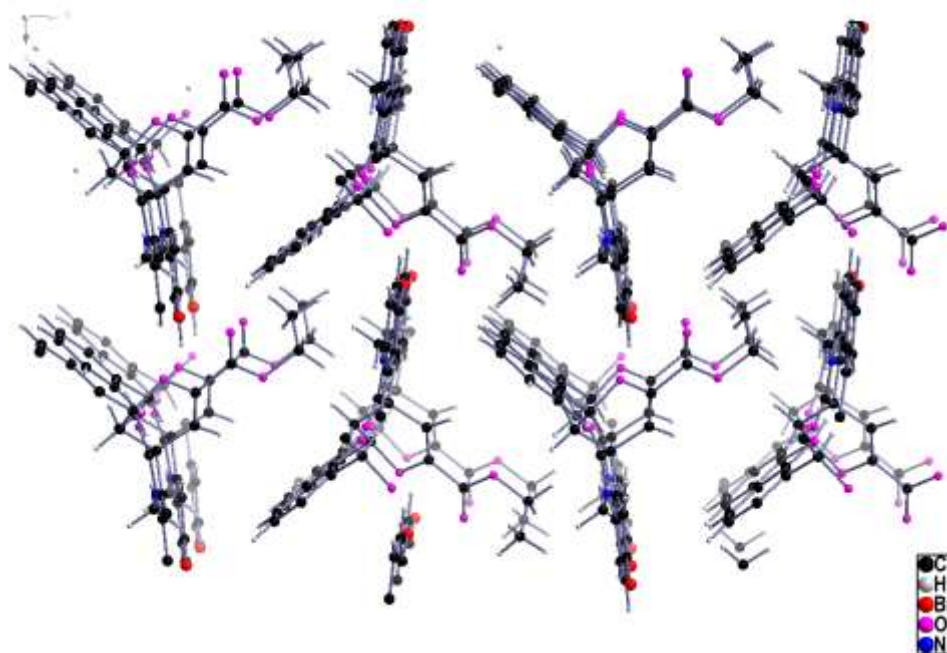

Figure S2. Packing of moleculars in a unit cell of **9i**

The crystal was prepared from the solution of **9i** in  $\text{CHCl}_3$ . CCDC 1543203 contains the supplementary crystallographic data for this paper. These data can be obtained free of charge from The Cambridge Crystallographic Data Centre via [www.ccdc.cam.ac.uk/data request/cif](http://www.ccdc.cam.ac.uk/data_request/cif).

### 3.4 Crystal structure determination of compound **12b**:

Crystal data and structure refinement for **12b**:

---

|                             |                                                                                                                               |
|-----------------------------|-------------------------------------------------------------------------------------------------------------------------------|
| Empirical formula           | $\text{C}_{21}\text{H}_{19}\text{BrN}_2\text{O}_4$                                                                            |
| Formula weight              | 443.29                                                                                                                        |
| Temperature                 | 120(2) K                                                                                                                      |
| Wavelength                  | 0.71073 Å                                                                                                                     |
| Crystal system, space group | monoclinic, C2                                                                                                                |
| Unit cell dimensions        | $a = 16.2892(11)$ Å, $\alpha = 90$ deg.<br>$b = 8.2430(5)$ Å, $\beta = 108.044(2)$ deg.<br>$c = 15.3465(11)$ Å, $c = 90$ deg. |
| Volume                      | $108.044(2)$ Å <sup>3</sup>                                                                                                   |
| Z, Calculated density       | 4, 1.503 Mg/cm <sup>3</sup>                                                                                                   |

---

|                                               |                                                                        |
|-----------------------------------------------|------------------------------------------------------------------------|
| Absorption coefficient                        | 2.128 mm <sup>-1</sup>                                                 |
| F(000)                                        | 904                                                                    |
| Crystal size                                  | 0.25 x 0.15 x 0.05 mm                                                  |
| Radiation                                     | MoK $\alpha$ ( $\lambda$ = 0.71073)                                    |
| Theta range for data collection               | 2.57 to 27.55 deg.                                                     |
| Limiting indices                              | -21 $\leq$ h $\leq$ 20, -10 $\leq$ k $\leq$ 10, -19 $\leq$ l $\leq$ 19 |
| Reflections collected / unique                | 16441/4468 [R(int) = 0.0698]                                           |
| Completeness to theta = 27.55                 | 99.4%                                                                  |
| Absorption correction                         | Semi-empirical from equivalents                                        |
| Refinement method                             | Full-matrix least-squares on F <sup>2</sup>                            |
| Data / restraints / parameters                | 4468/1/260                                                             |
| Goodness-of-fit on F <sup>2</sup>             | 0.984                                                                  |
| Final R indexes [I $\geq$ 2 $\sigma$ (I)]     | R <sub>1</sub> = 0.0335, wR <sub>2</sub> = 0.0660                      |
| Final R indexes [all data]                    | R <sub>1</sub> = 0.0419, wR <sub>2</sub> = 0.0693                      |
| Largest diff. peak/hole / e $\text{\AA}^{-3}$ | 0.301 and -0.553                                                       |
| Absolute structure parameter                  | 0.005(7)                                                               |

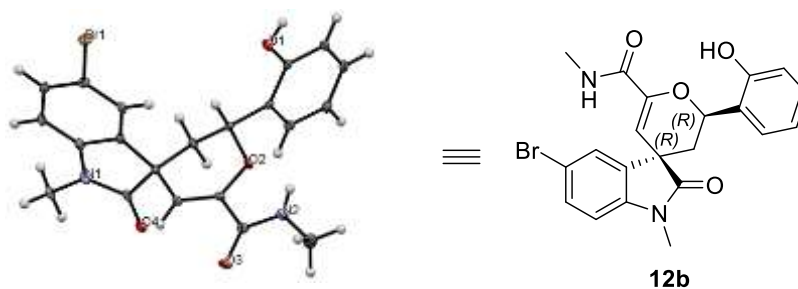

Figure S3. ORTEP drawing of **12b** (40% thermal ellipsoids)

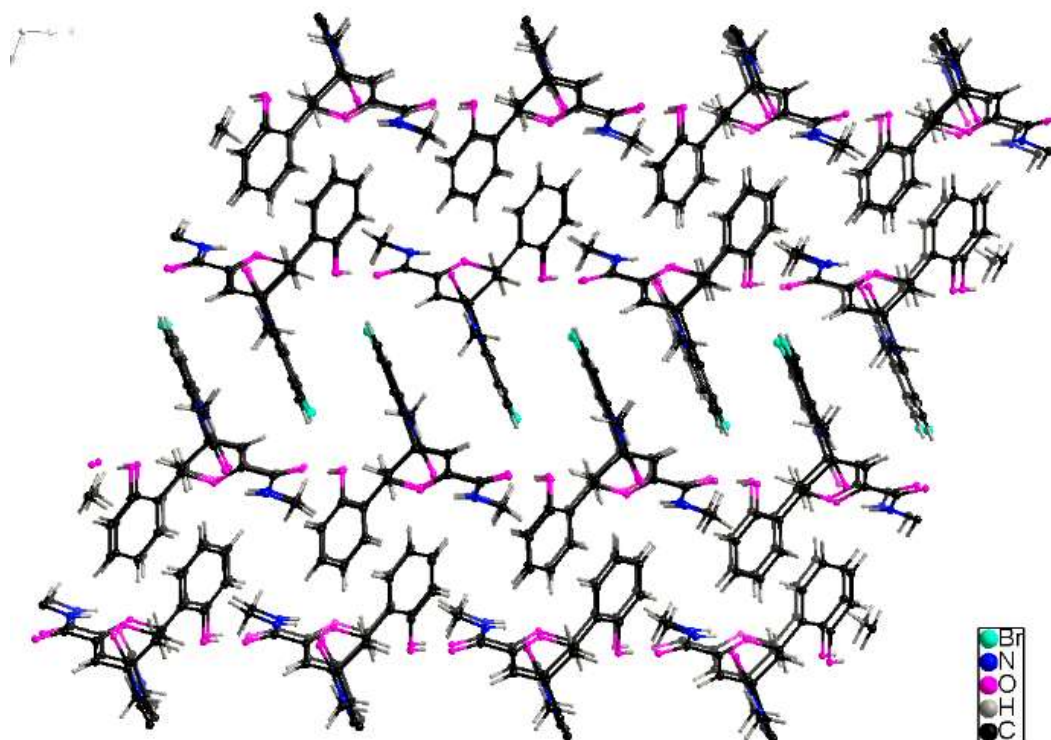

Figure S4. Packing of moleculars in a unit cell of **12b**

The crystal was prepared from the solution of **12b** in EtOH. CCDC 1549570 contains the supplementary crystallographic data for this paper. These data can be obtained free of charge from The Cambridge Crystallographic Data Centre via [www.ccdc.cam.ac.uk/data request/cif](http://www.ccdc.cam.ac.uk/data_request/cif).

#### 4. $^1\text{H}$ NMR, $^{19}\text{F}$ NMR and $^{13}\text{C}$ NMR spectra

##### Ethyl-(3*S*,4*a*'*S*,8*a*'*S*)-1-methyl-2-oxo-4*a*',6',7',8*a*'-tetrahydro-5'*H*-spiro[indoline-3,4'-pyrano[2,3-*b*]pyran]-2'-carboxylate **4a**

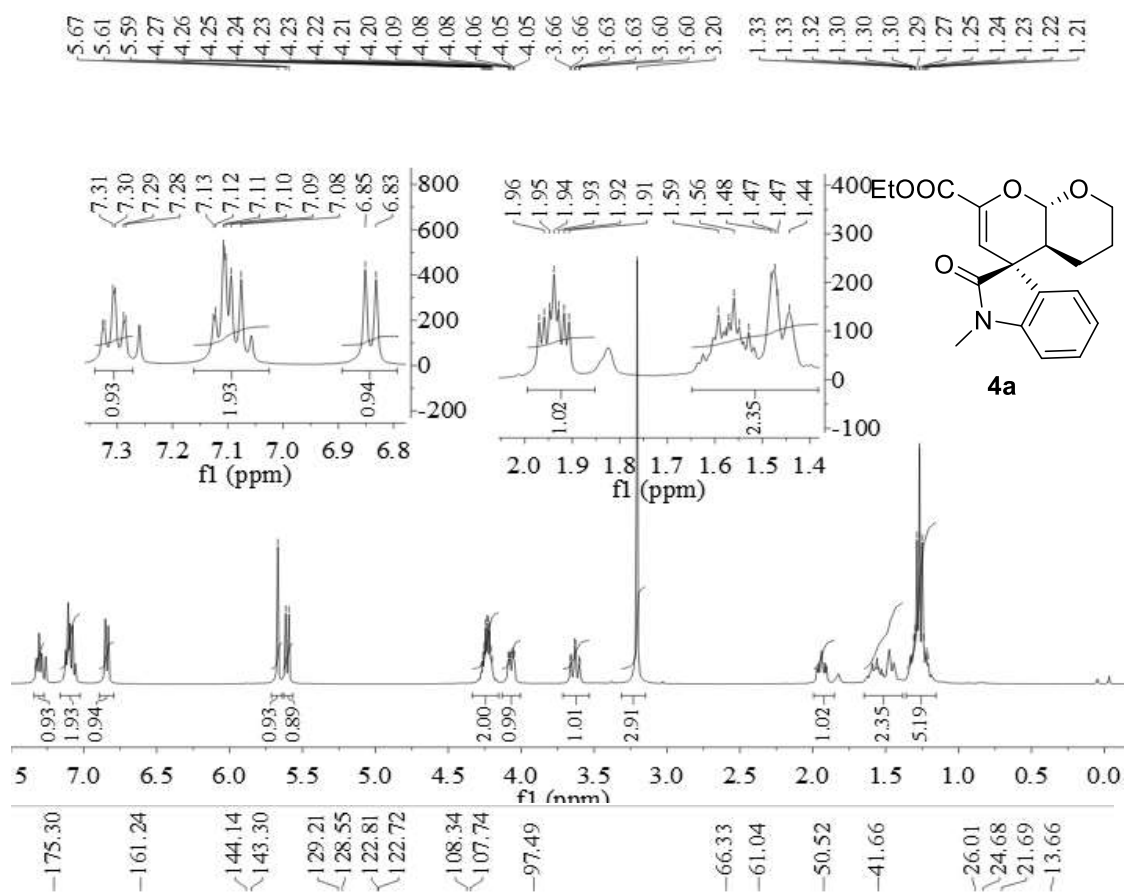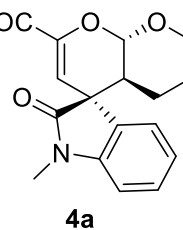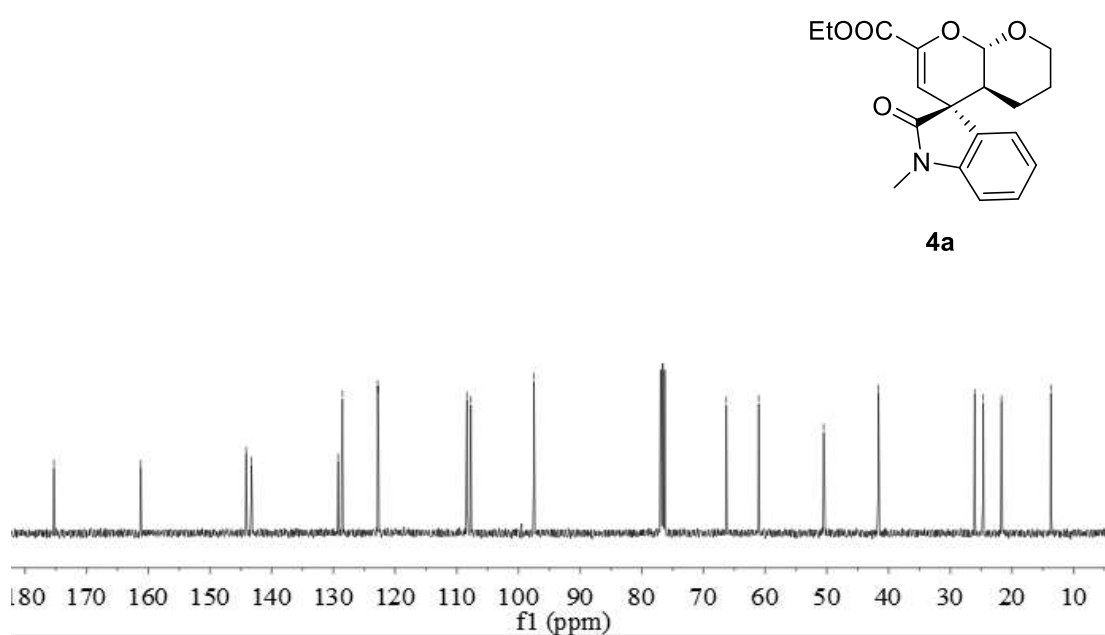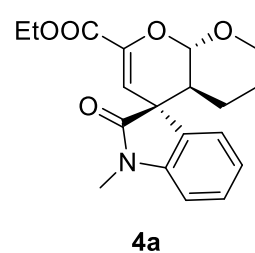

**Ethyl-(3*S*,4*a*'*S*,8*a*'*S*)-1-methyl-2-oxo-4*a*',6',7',8*a*'-tetrahydro-5'*H*-spiro[indoline-3,4'-pyrano[2,3-*b*]pyran]-2'-carboxylate 4b**

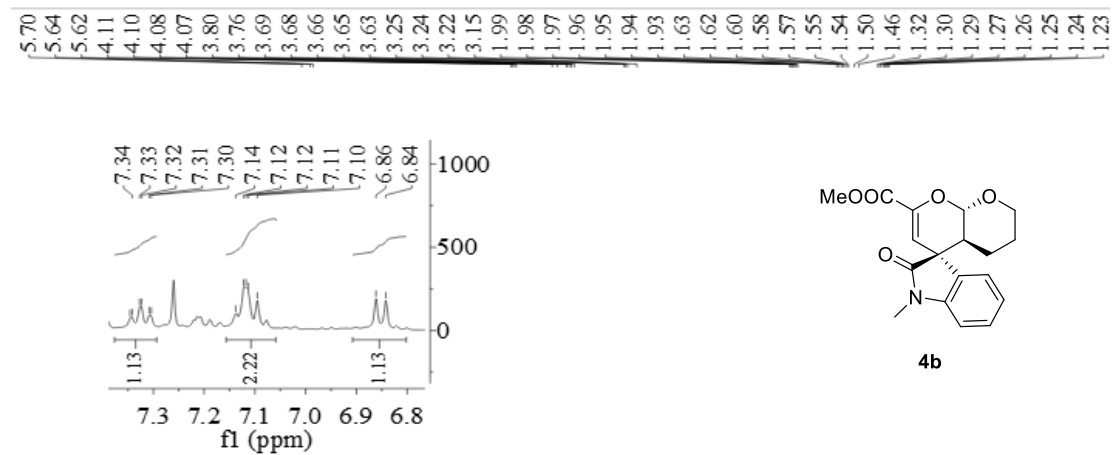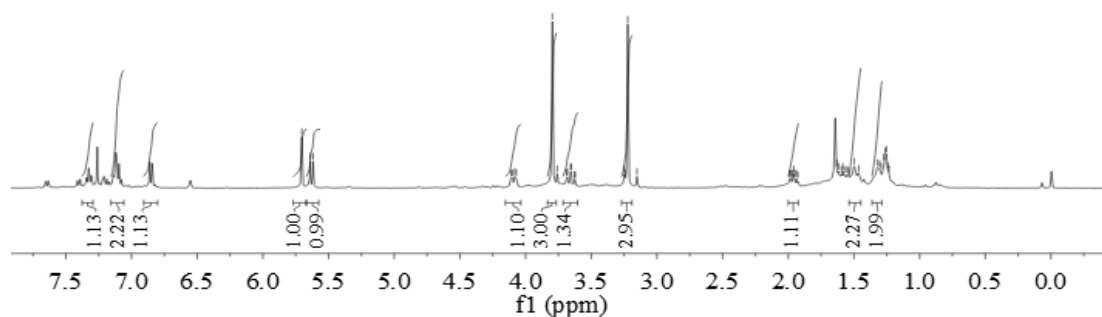

-175.25  
 -161.77  
 143.94  
 143.31  
 128.58  
 122.79  
 121.43  
 119.26  
 108.63  
 107.73  
 -97.53  
 -66.33  
 51.91  
 50.53  
 41.67  
 26.02  
 24.69  
 21.69

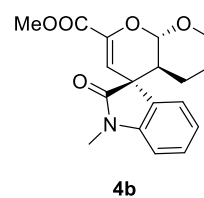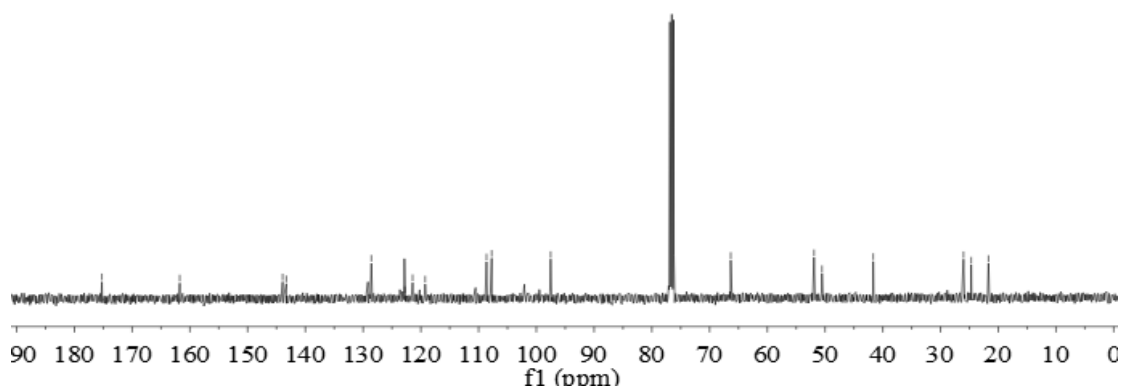



**Ethyl-(3*S*,4*a*'*S*,8*a*'*S*)-1-(methoxymethyl)-2-oxo-4*a*',6',7',8*a*'-tetrahydro-5'*H*-spiro  
[indoline-3,4'-pyrano[2,3-*b*]pyran]-2'-carboxylate **4d****

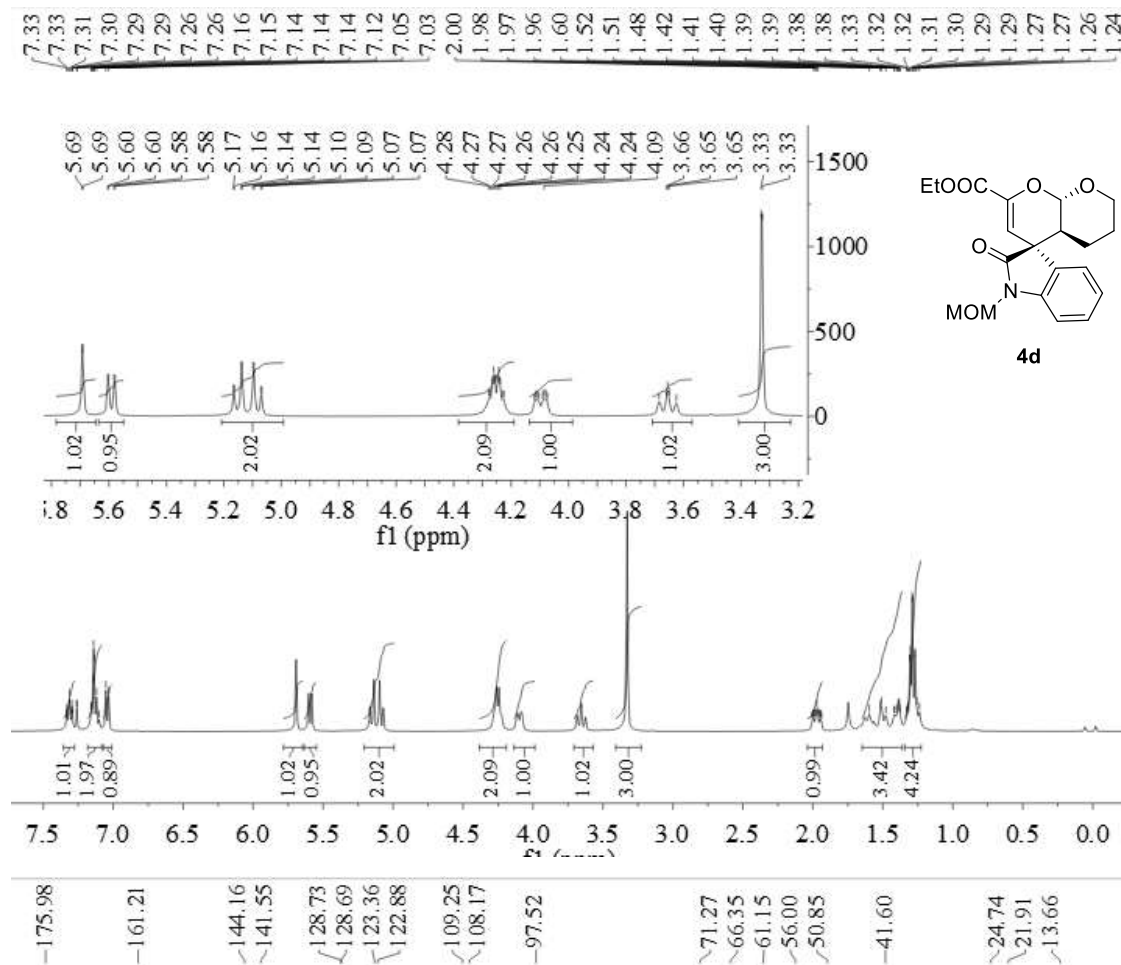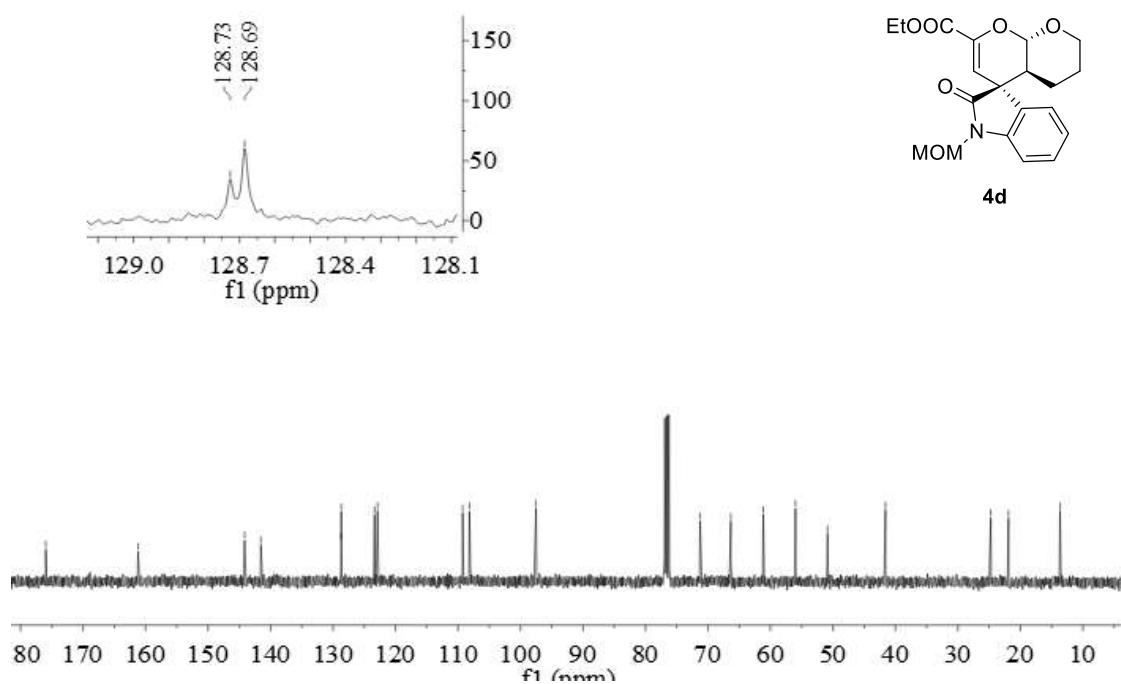

**Ethyl-(3*S*,4*a*'*S*,8*a*'*S*)-1-allyl-2-oxo-4*a*',6',7',8*a*'-tetrahydro-5'*H*-spiro[indoline-3,4'-pyrano[2,3-*b*]pyran]-2'-carboxylate **4e****

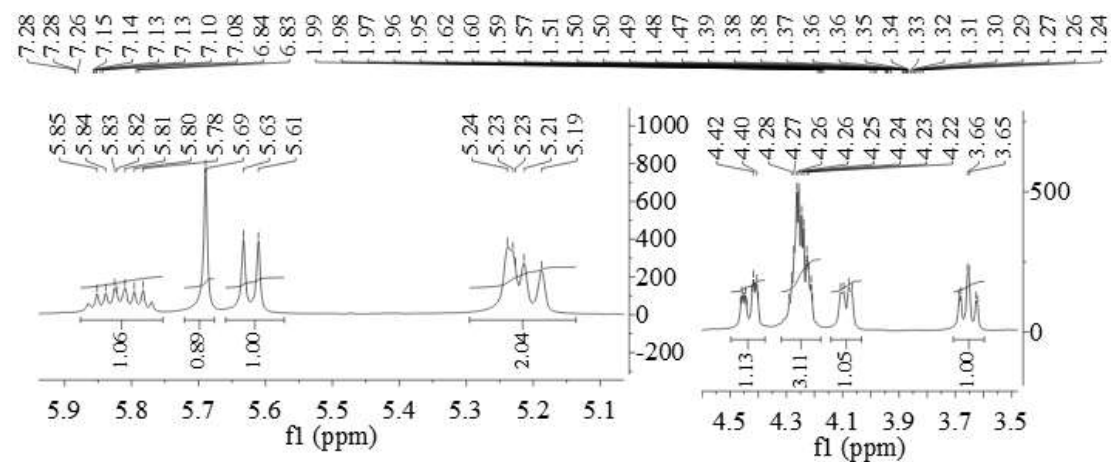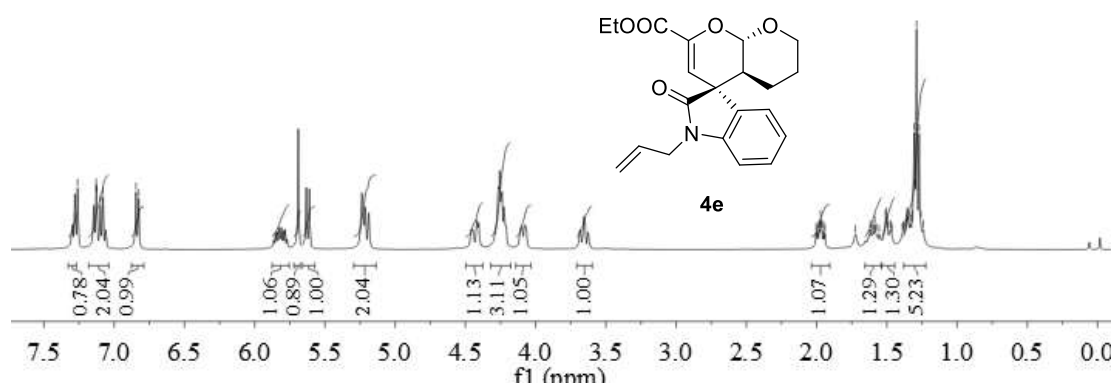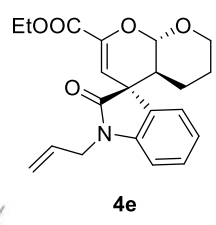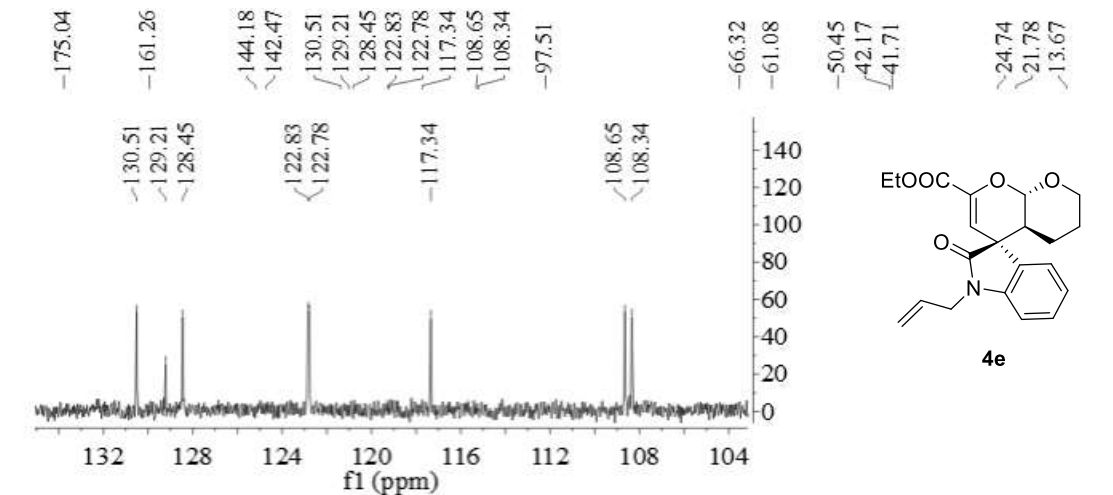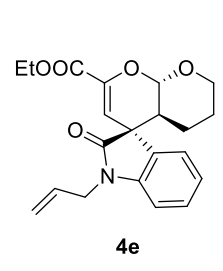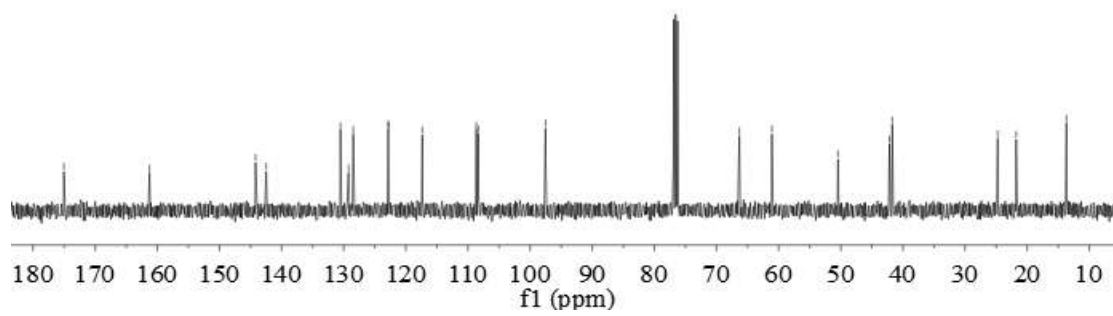

**Ethyl-(3*S*,4*a*'*S*,8*a*'*S*)-1-benzyl-2-oxo-4*a*',6',7',8*a*'-tetrahydro-5'*H*-spiro[indoline-3,4'-pyrano[2,3-*b*]pyran]-2'-carboxylate 4f**

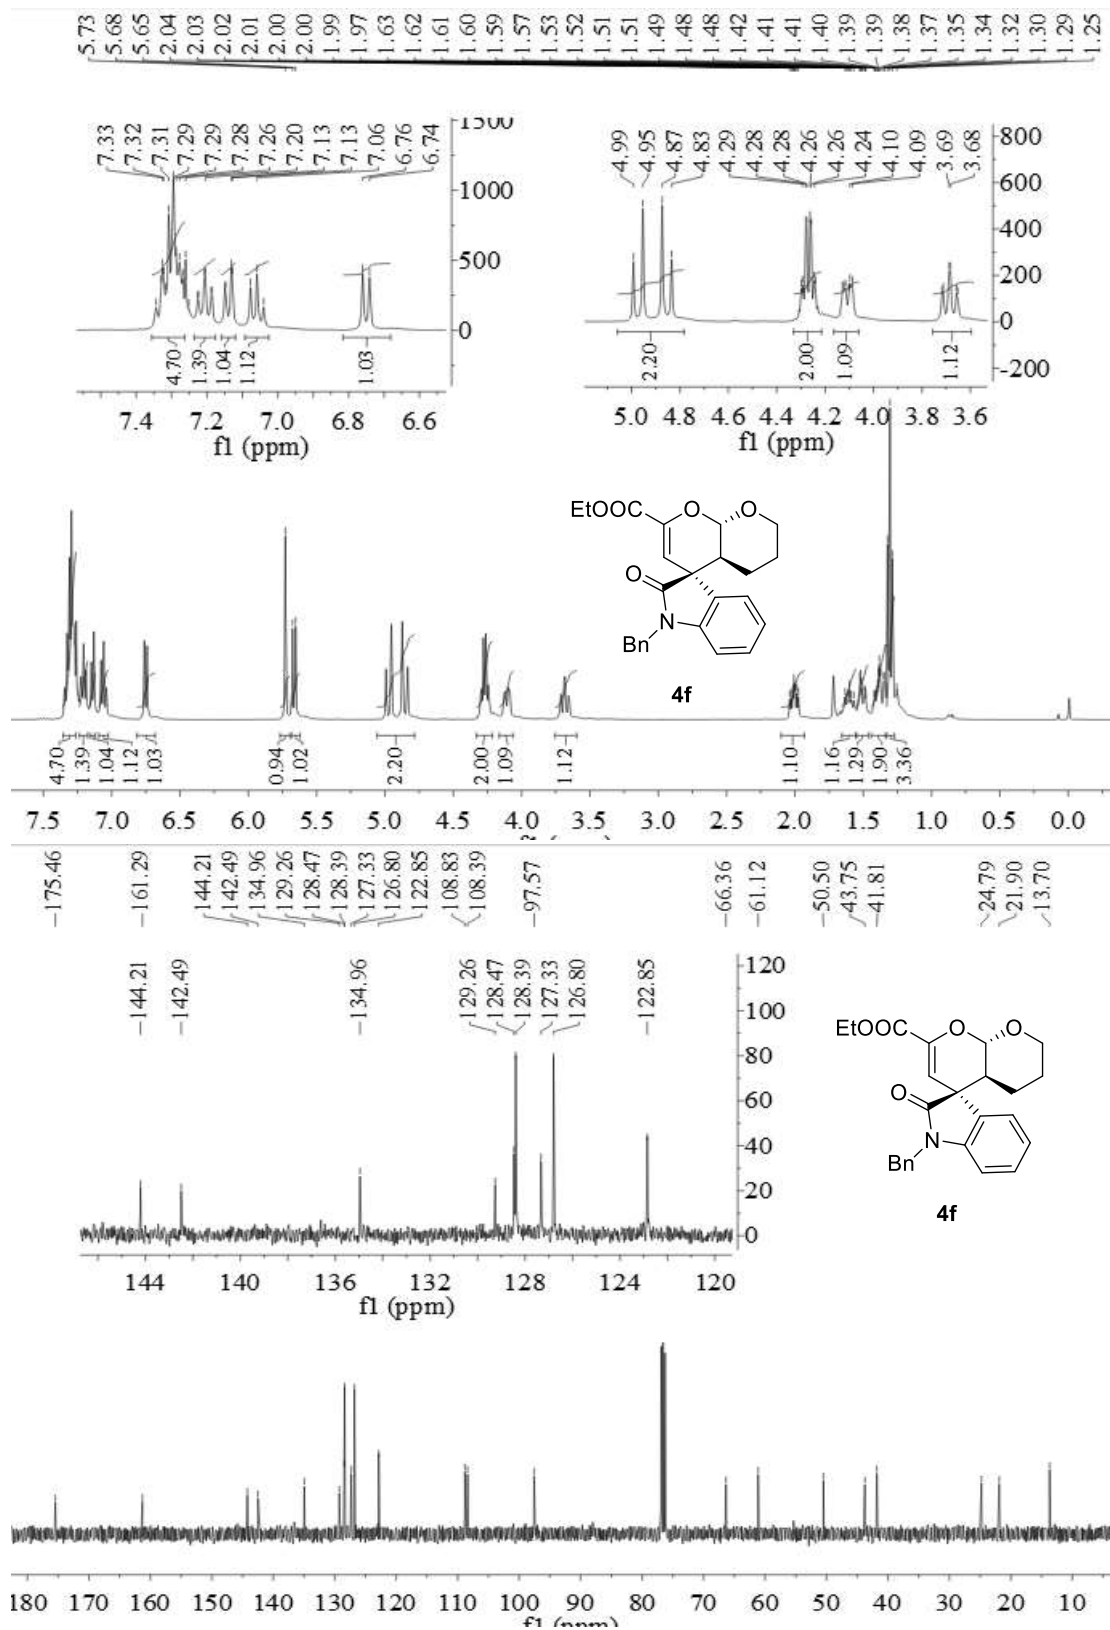

**Ethyl-(3*S*,4*a'**S*,8*a'**S*)-1-acetyl-2-oxo-4*a'*,6',7',8*a'*-tetrahydro-5'*H*-spiro[indoline-3,4'-pyrano[2,3-*b*]pyran]-2'-carboxylate **4g****

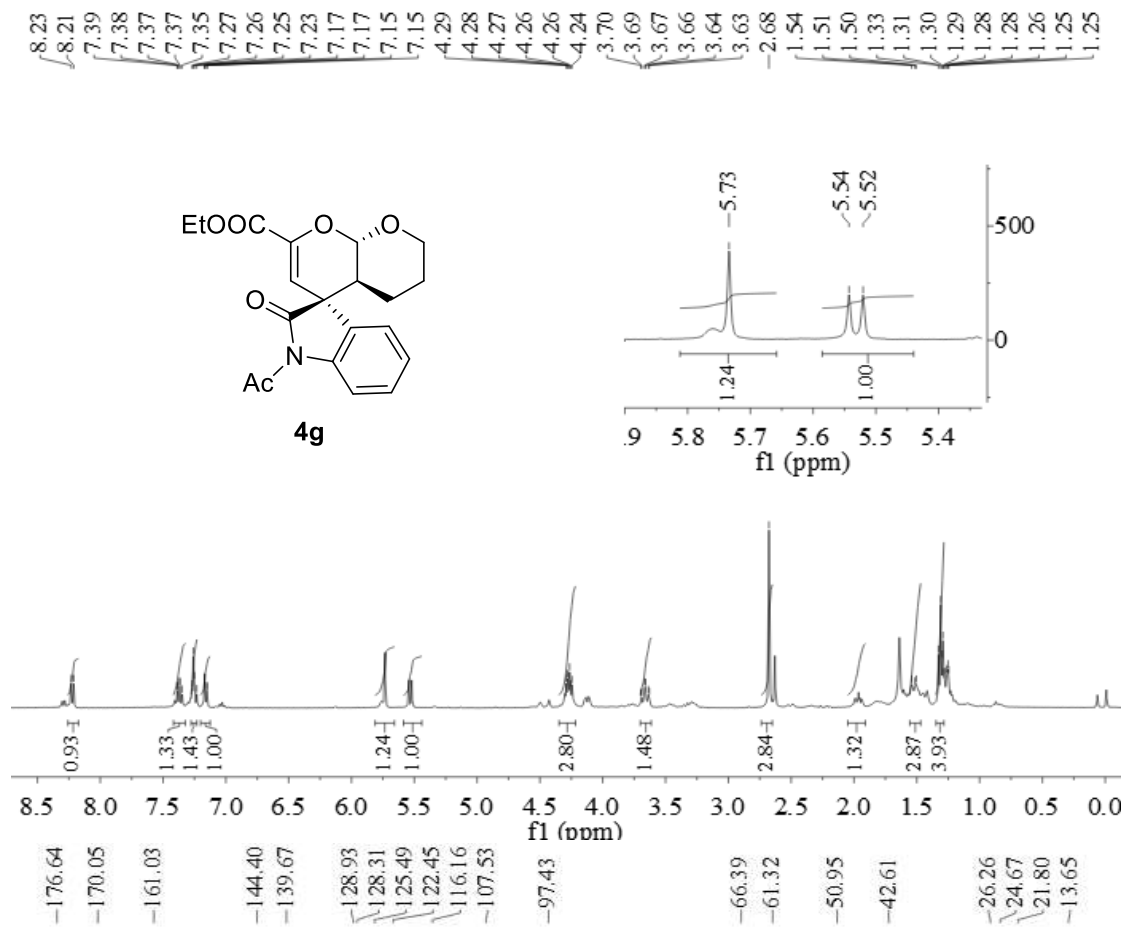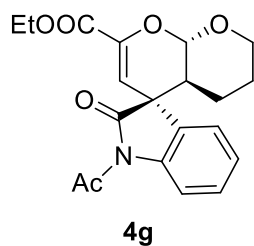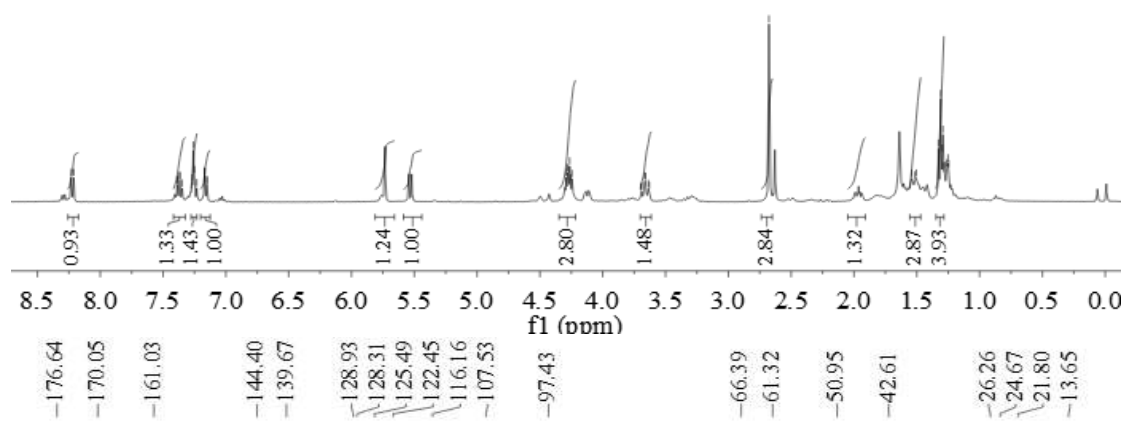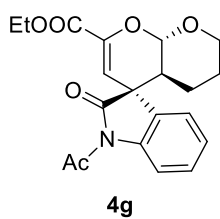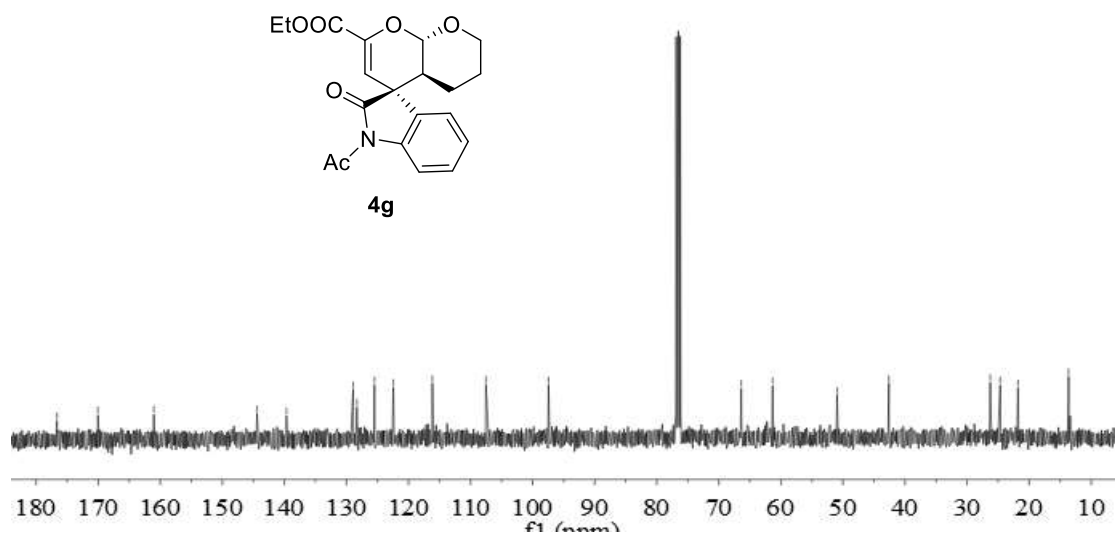

**Ethyl-(3*S*,4*a'**S*,8*a'**S*)-5-fluoro-1-methyl-2-oxo-4*a'*,6',7',8*a'*-tetrahydro-5'*H*-spiro[indoline-3,4'-pyrano[2,3-*b*]pyran]-2'-carboxylate 4h**

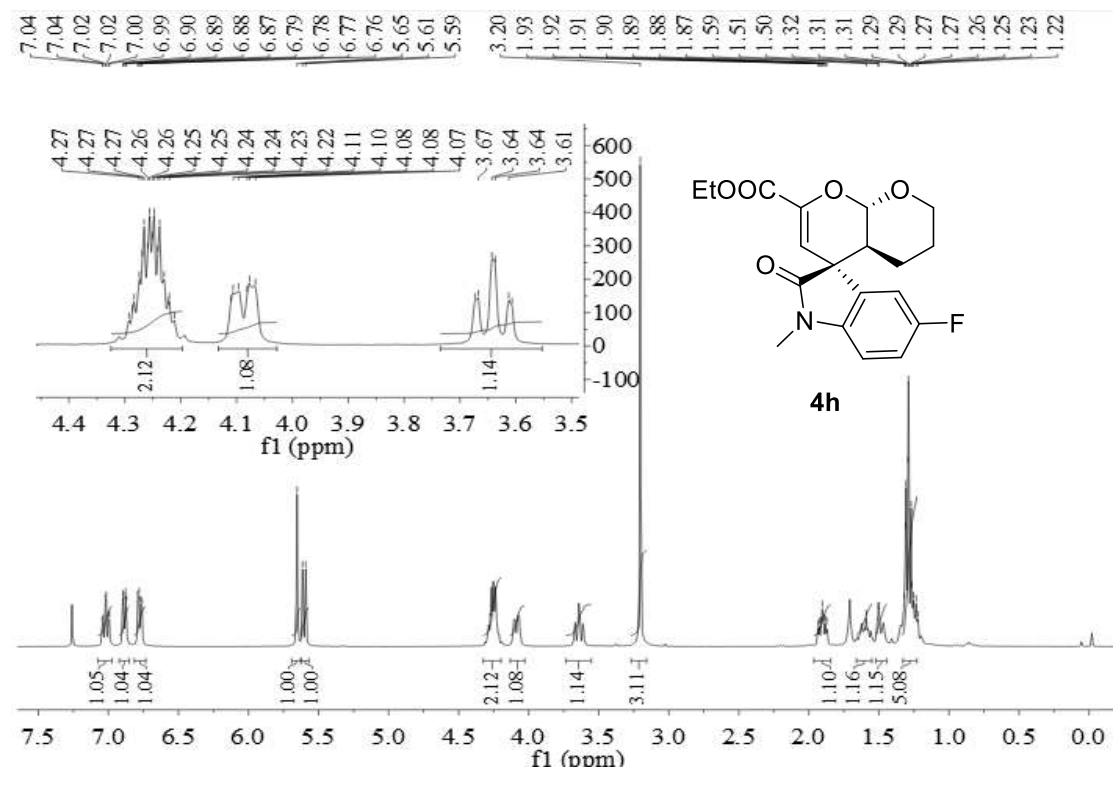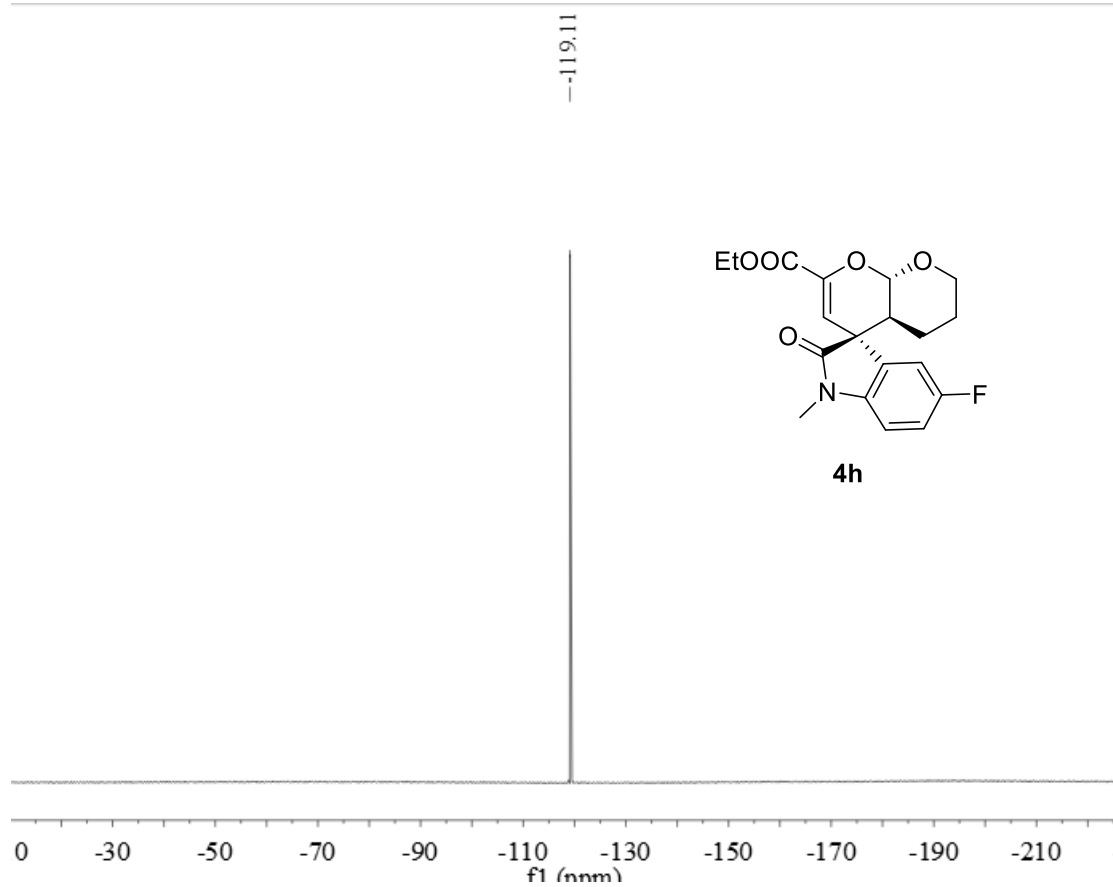

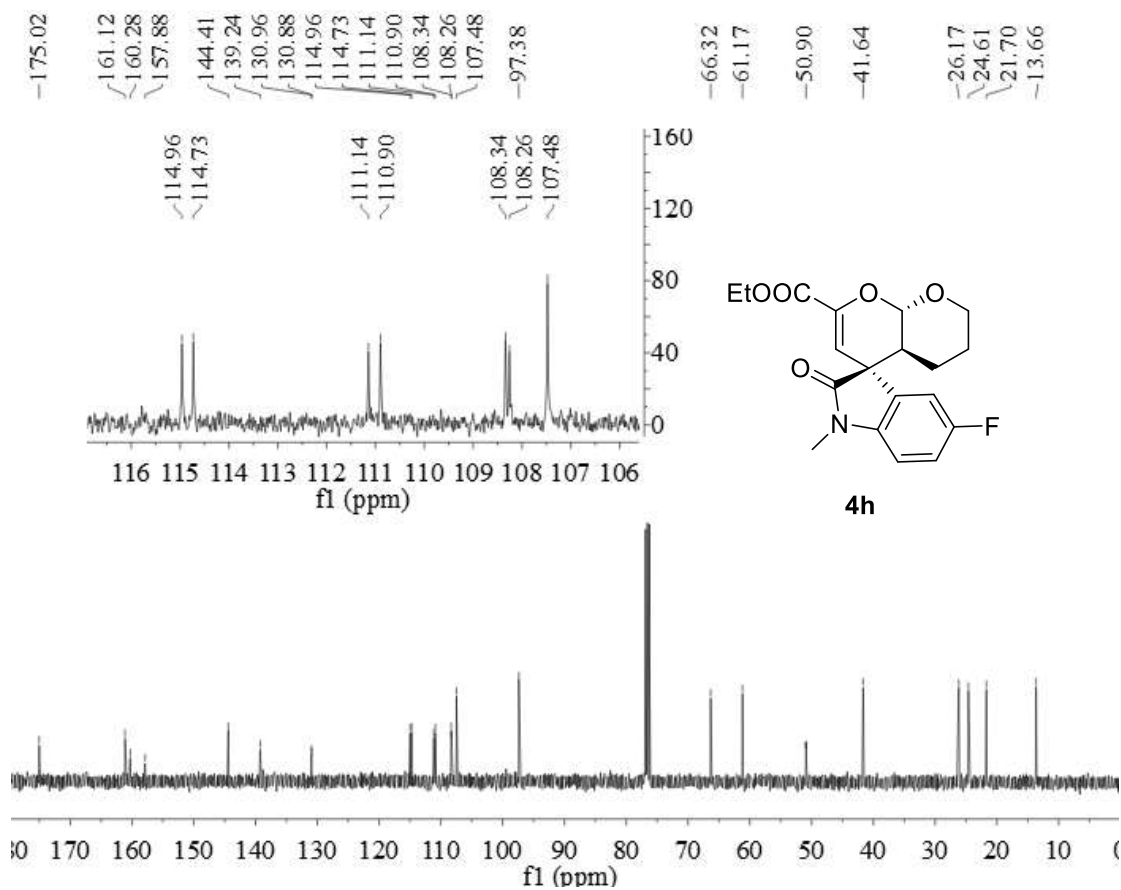

**Ethyl-(3*S*,4*a*'*S*,8*a*'*S*)-5-chloro-1-methyl-2-oxo-4*a*',6',7',8*a*'-tetrahydro-5'*H*-spiro [indoline-3,4'-pyrano[2,3-*b*]pyran]-2'-carboxylate 4i**

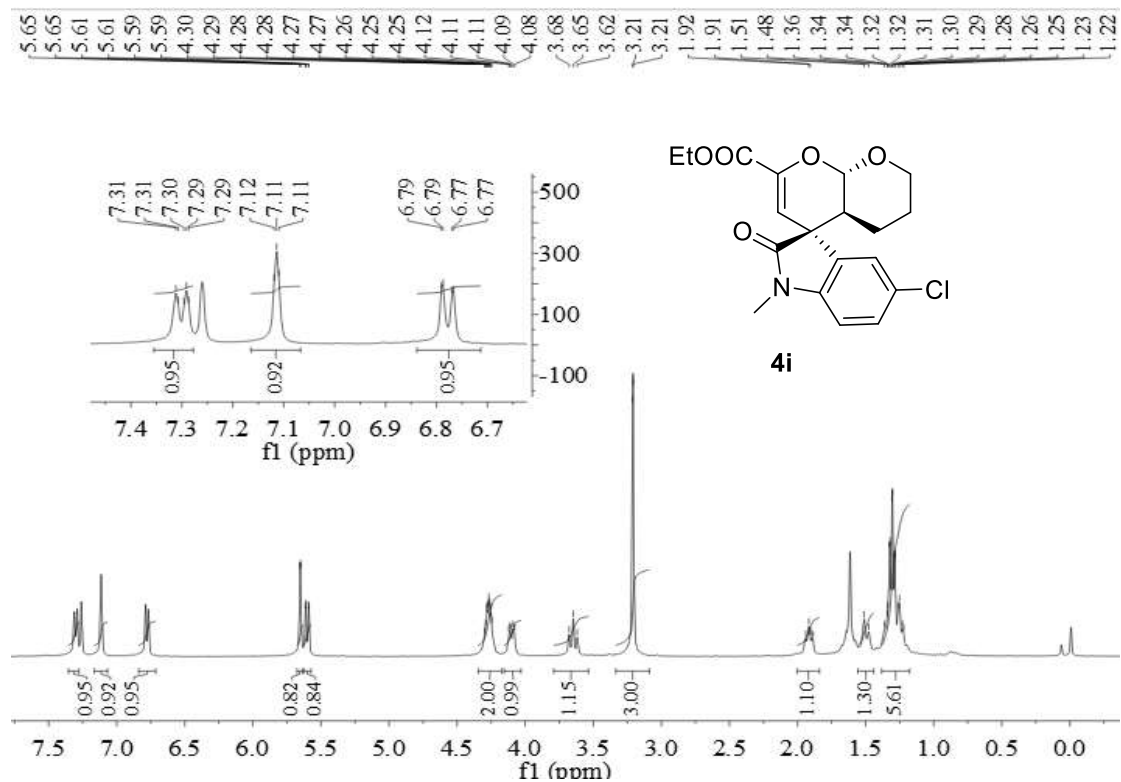

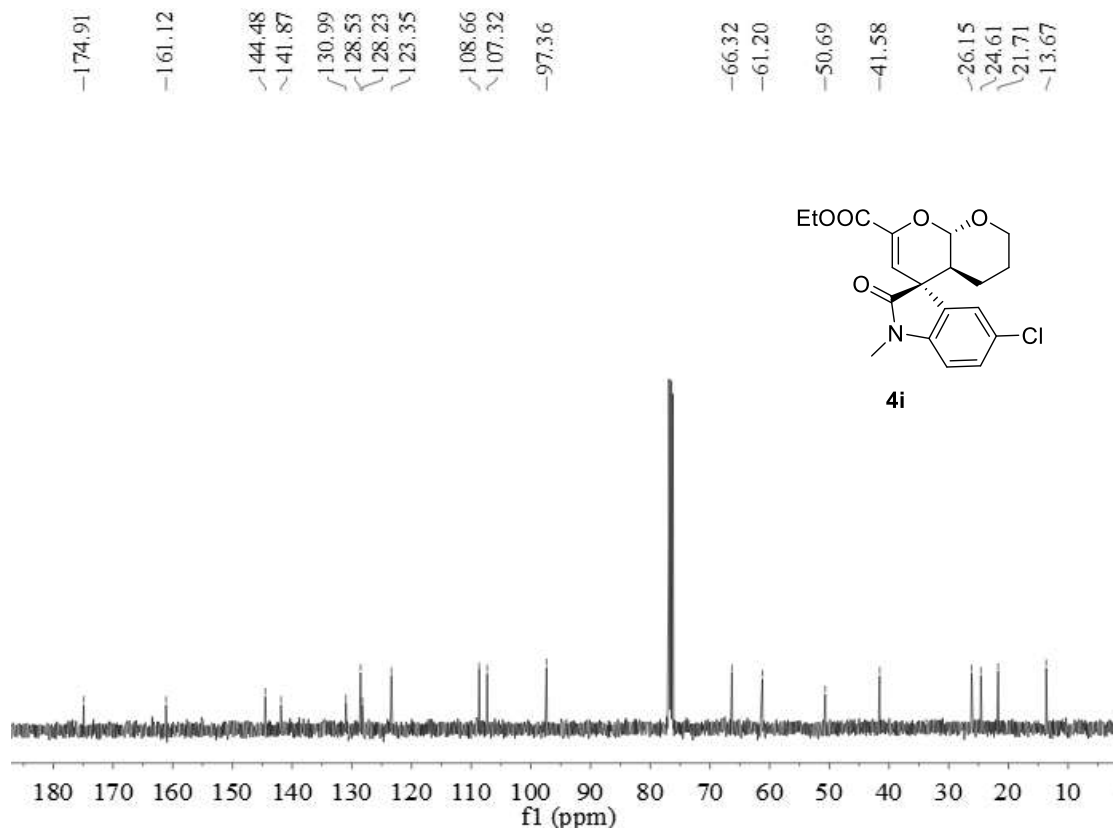

**Ethyl-(3*S*,4*a*'*S*,8*a*'*S*)-5-bromo-1-methyl-2-oxo-4*a*'*S*,6',7',8*a*'-tetrahydro-5'*H*-spiro [indoline-3,4'-pyrano[2,3-b]pyran]-2'-carboxylate **4j****

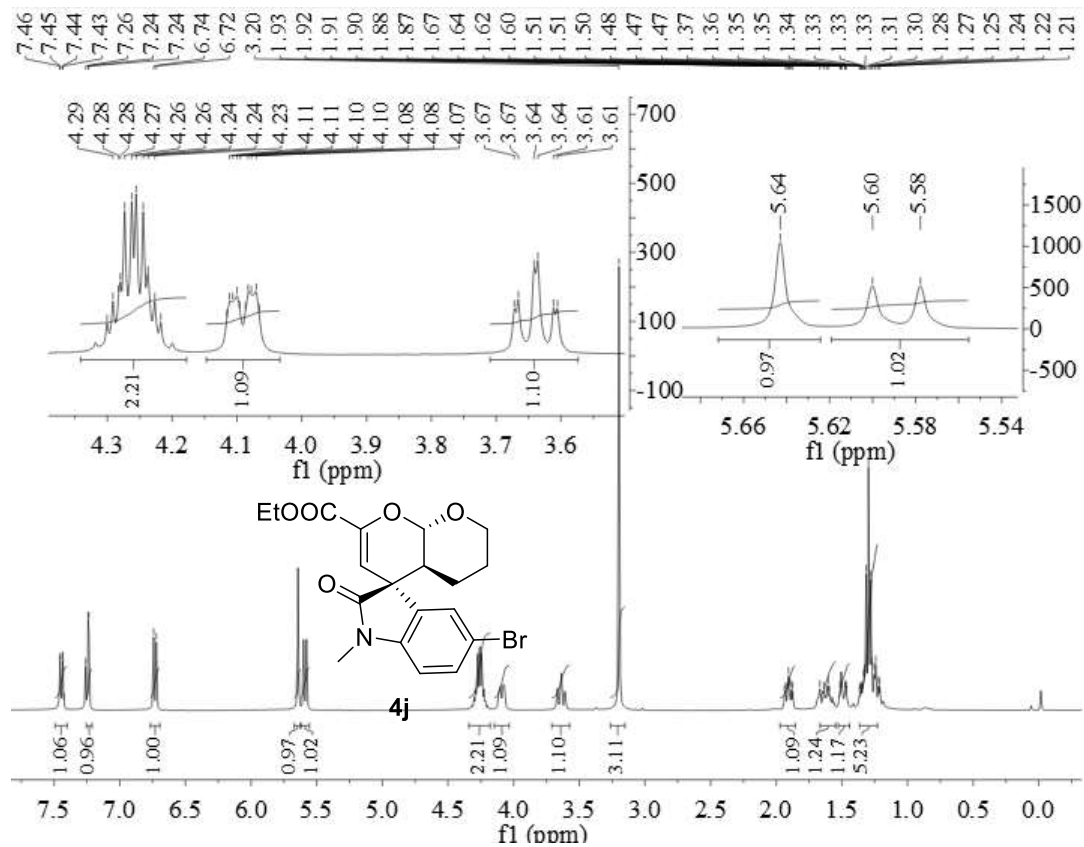

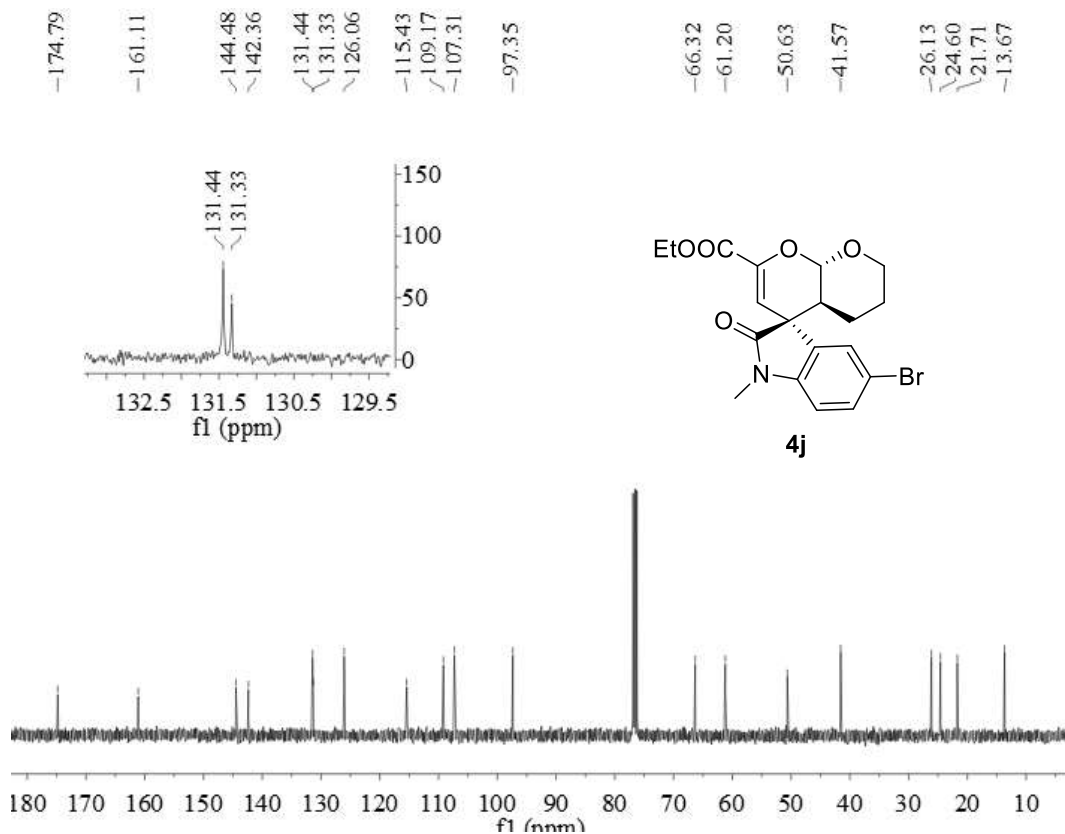

**Ethyl-(3*S*,4*a*'*S*,8*a*'*S*)-5-methoxy-1-methyl-2-oxo-4*a*',6',7',8*a*'-tetrahydro-5'*H*-spiro[indoline-3,4'-pyrano[2,3-*b*]pyran]-2'-carboxylate **4k****

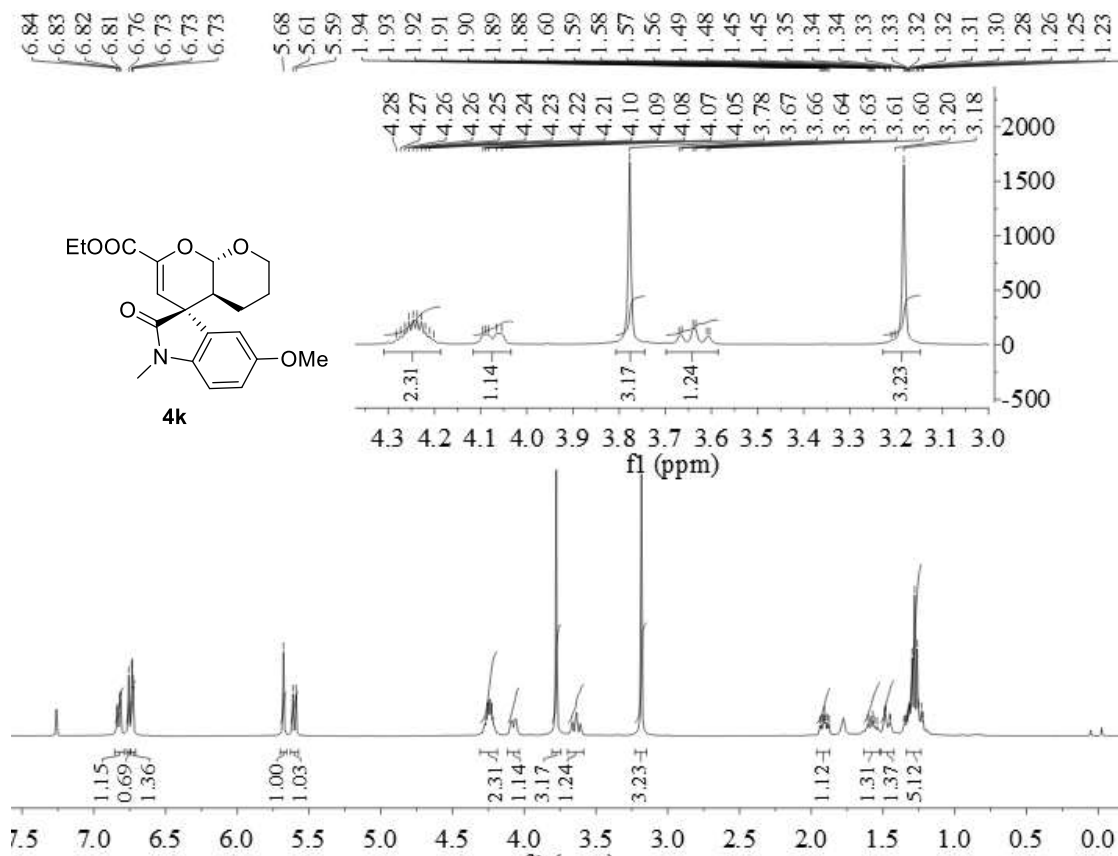



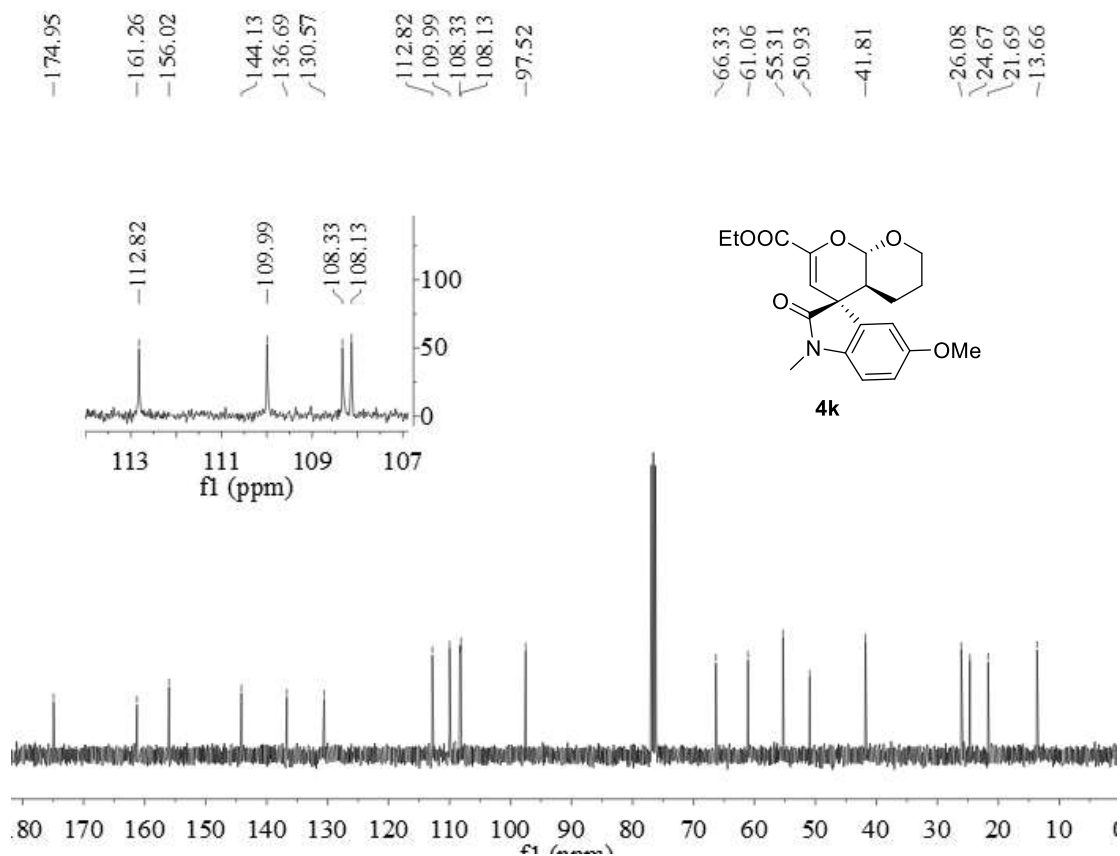

**Ethyl-(3*S*,4*a'**S*,8*a'**S*)-1,5,7-trimethyl-2-oxo-4*a'*,6',7',8*a'*-tetrahydro-5*H*-spiro [indoline-3,4'-pyrano[2,3-b]pyran]-2'-carboxylate **4l****

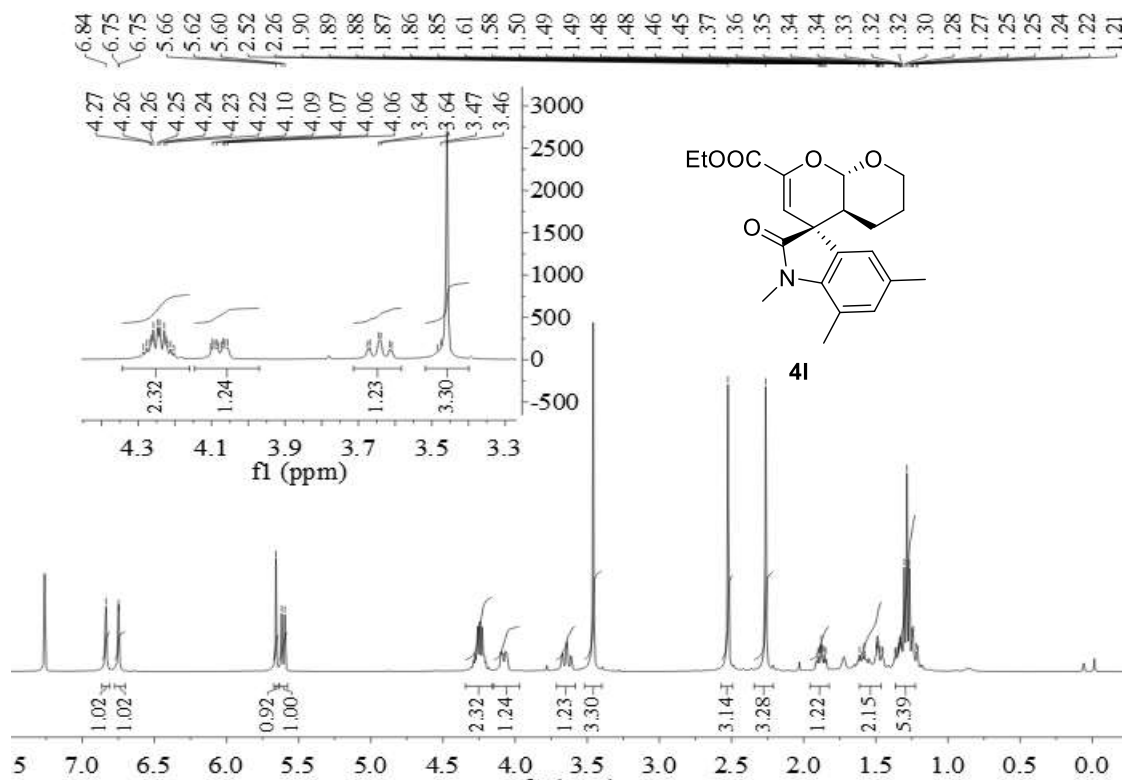

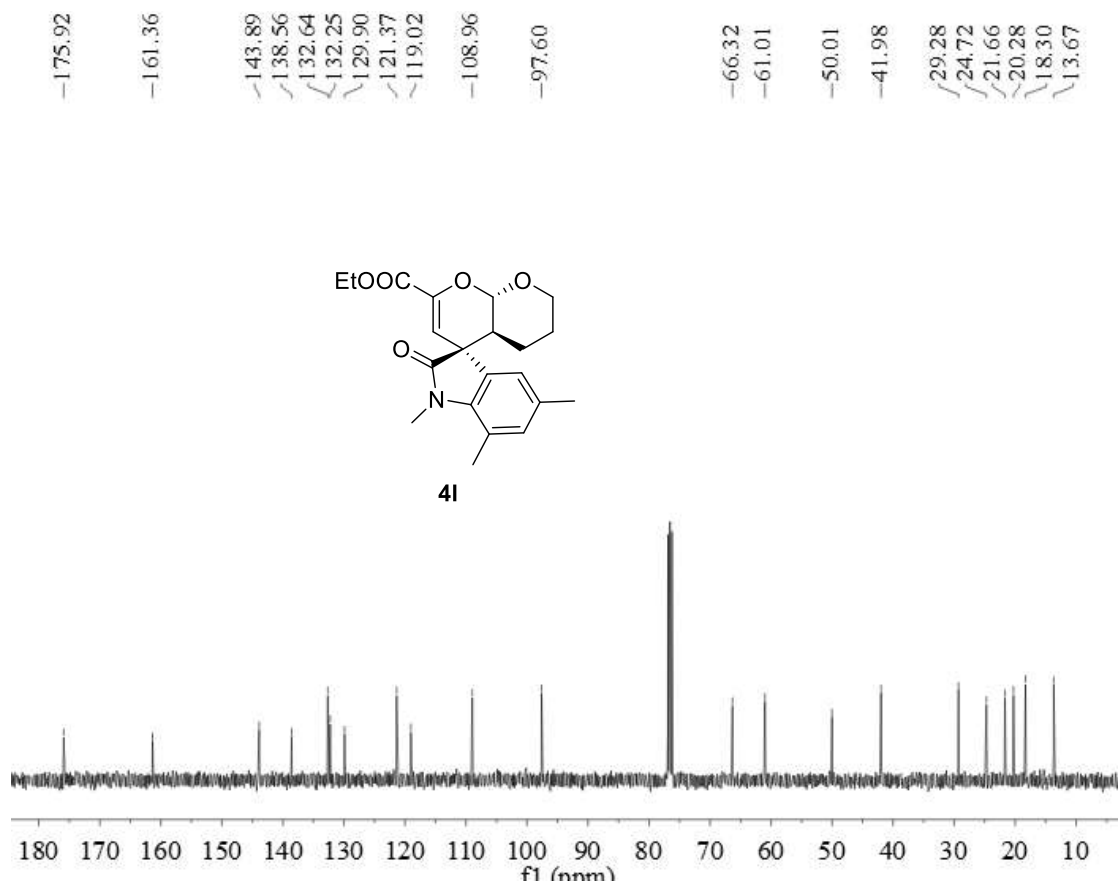

**Ethyl-(3*S*,4*a'**S*,8*a'**S*)-6-chloro-1-methyl-2-oxo-4*a'*,6',7',8*a'*-tetrahydro-5'*H*-spiro [indoline-3,4'-pyrano[2,3-*b*]pyran]-2'-carboxylate **4m****

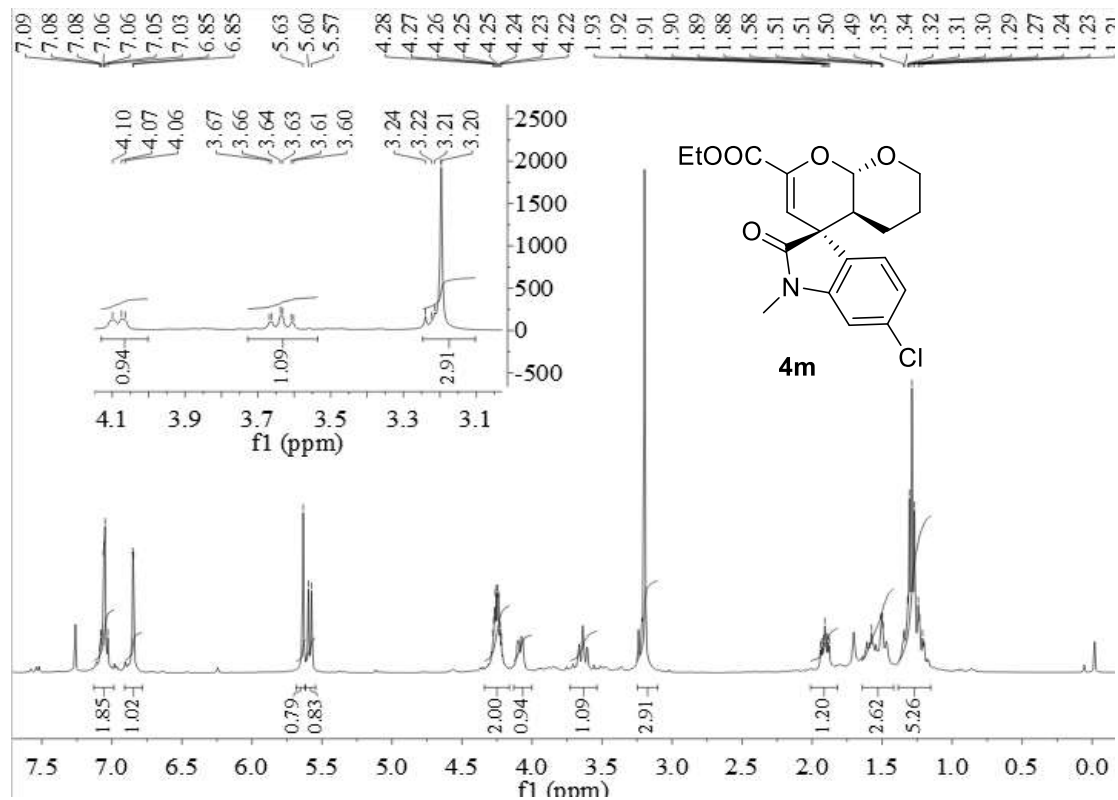

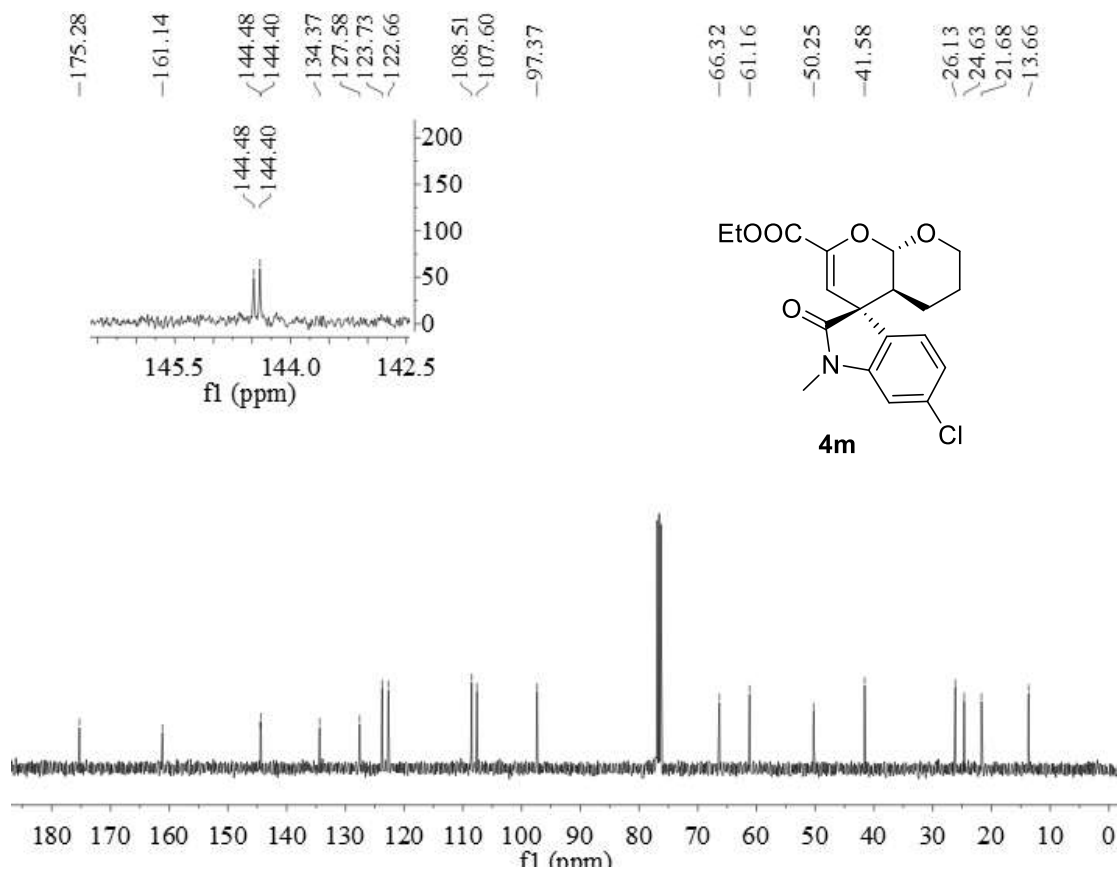

**Ethyl-(3*S*,4*a'**S*,8*a'**S*)-7-fluoro-1-methyl-2-oxo-4*a'*,6',7',8*a'*-tetrahydro-5'*H*-spiro[indoline-3,4'-pyrano[2,3-*b*]pyran]-2'-carboxylate **4n****

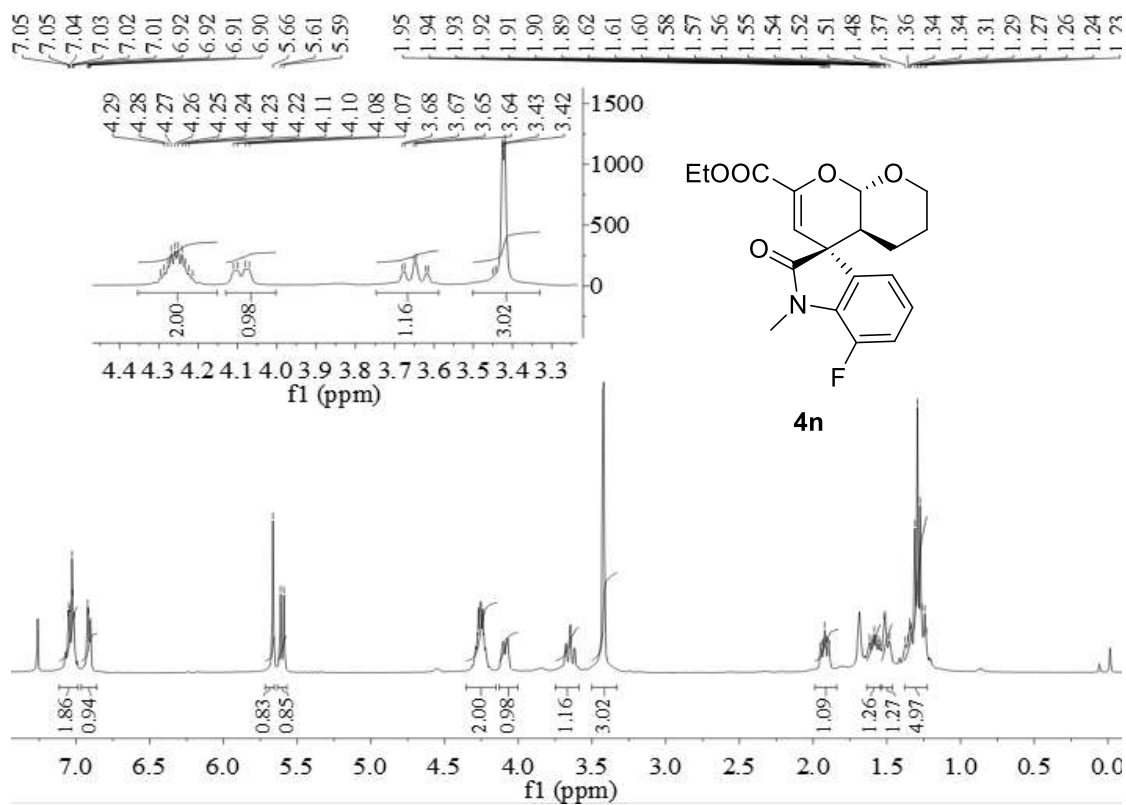

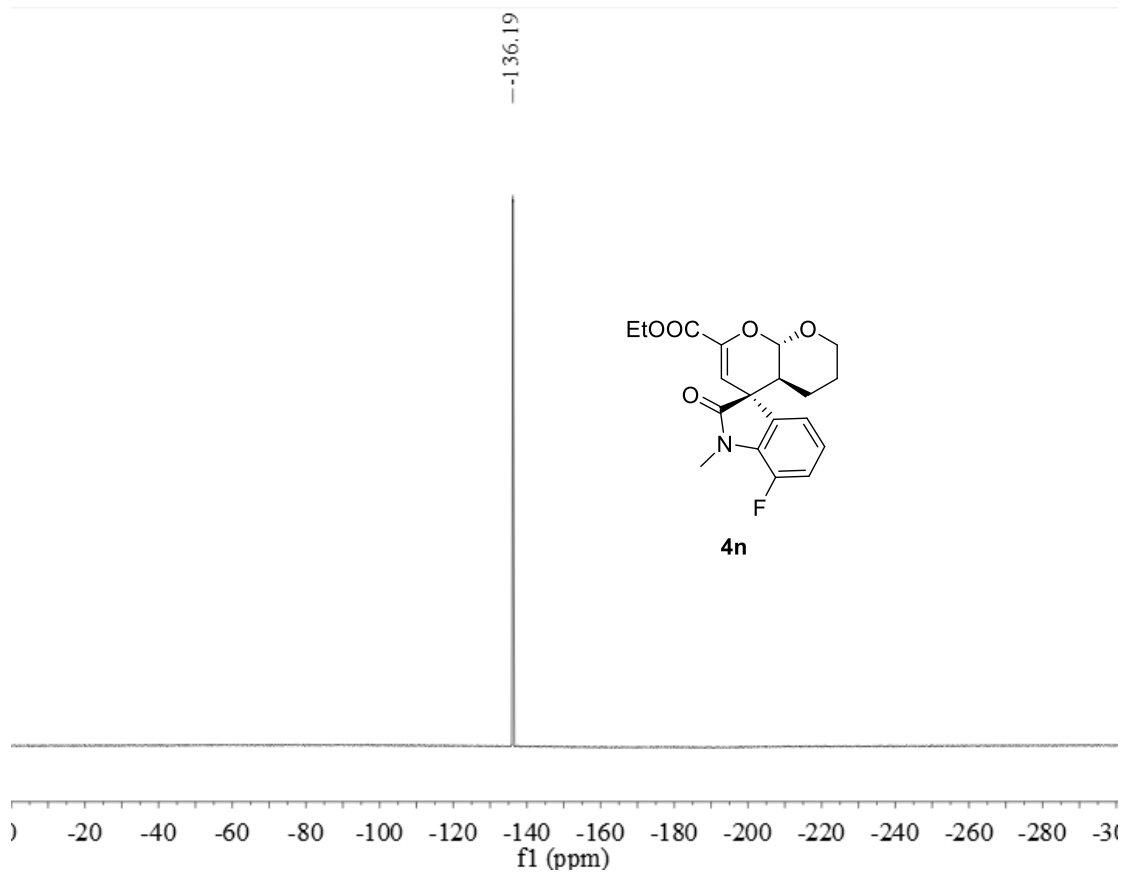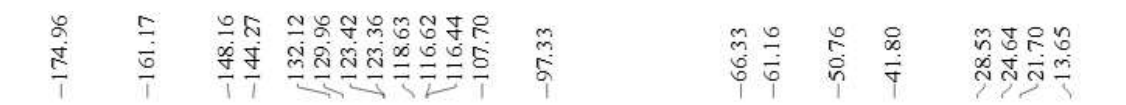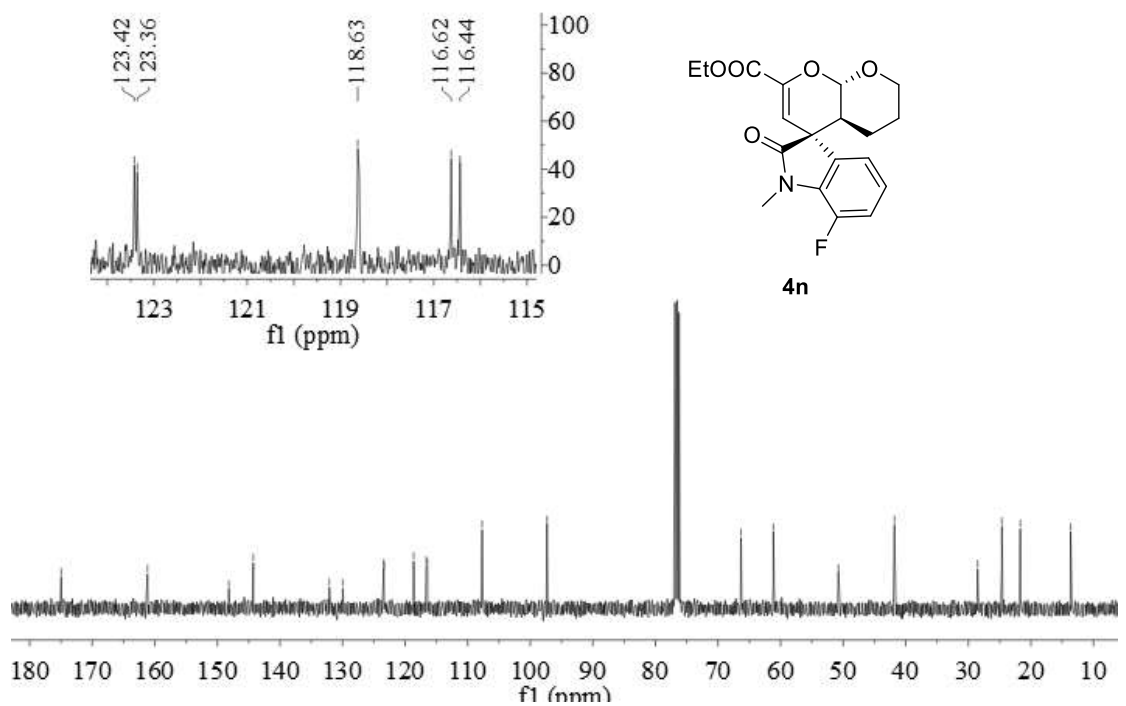

**Ethyl-(3*S*,4*a'**S*,8*a'**S*)-1,7-dimethyl-2-oxo-4*a'*,6',7',8*a'*-tetrahydro-5'*H*-spiro  
[indoline-3,4'-pyrano[2,3-*b*]pyran]-2'-carboxylate **4o****

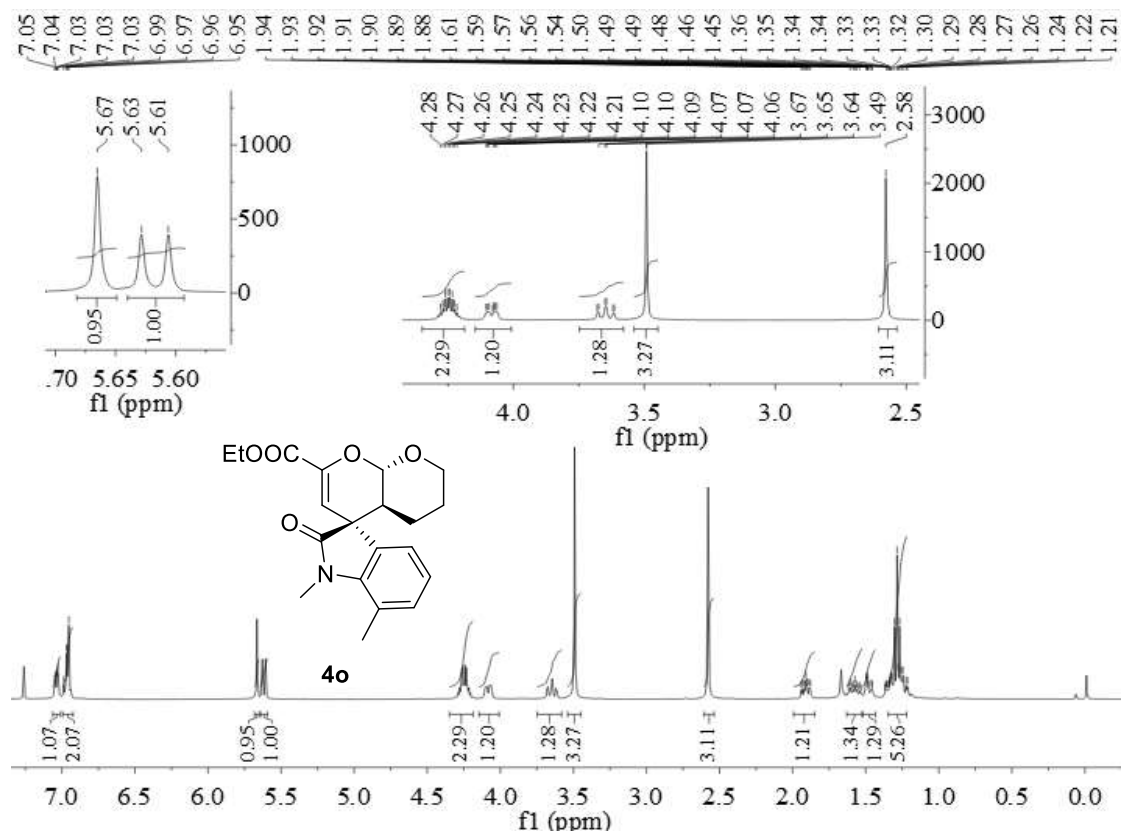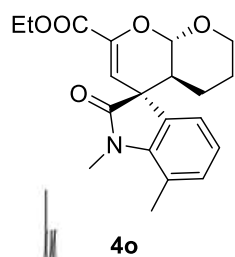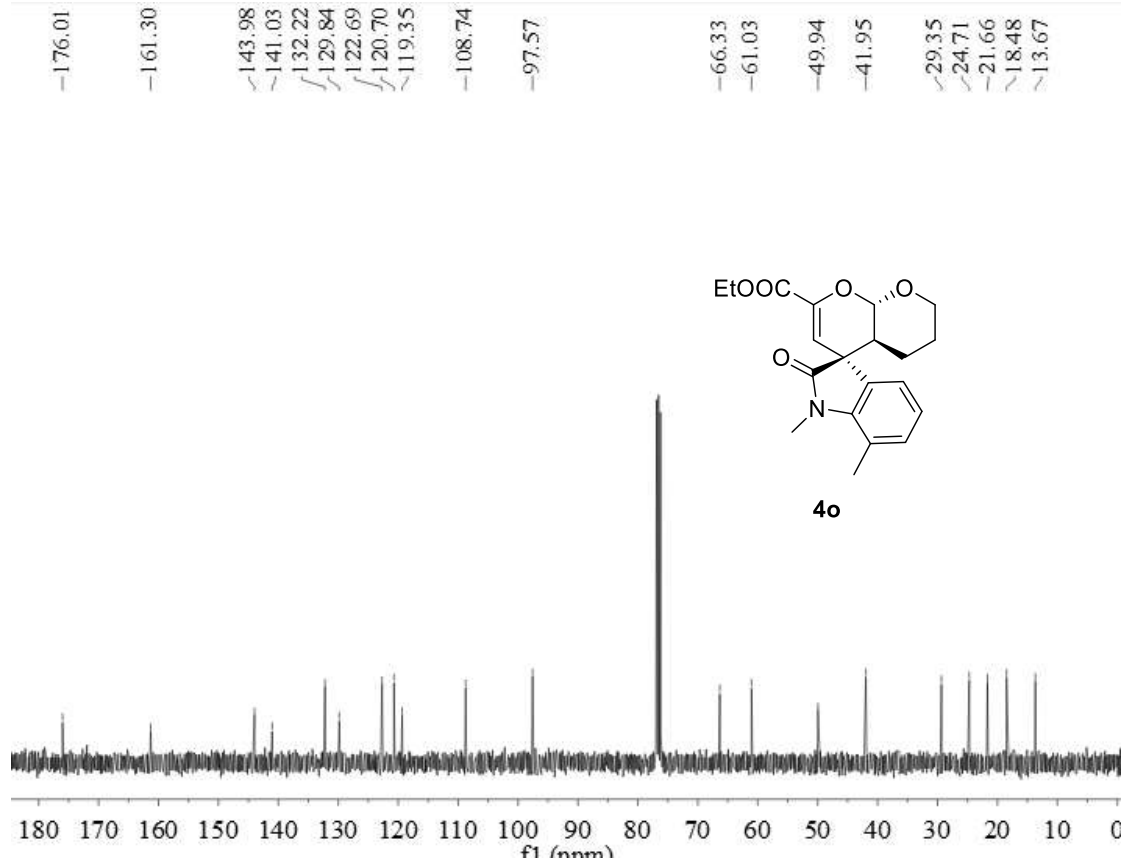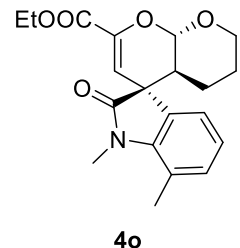

**Ethyl-(3a*S*,4*S*,7a*R*)-1'-methyl-2'-oxo-2,3,3a,7a-tetrahydrospiro[furo[2,3-*b*]pyran-4,3'-indoline]-6-carboxylate **3a****

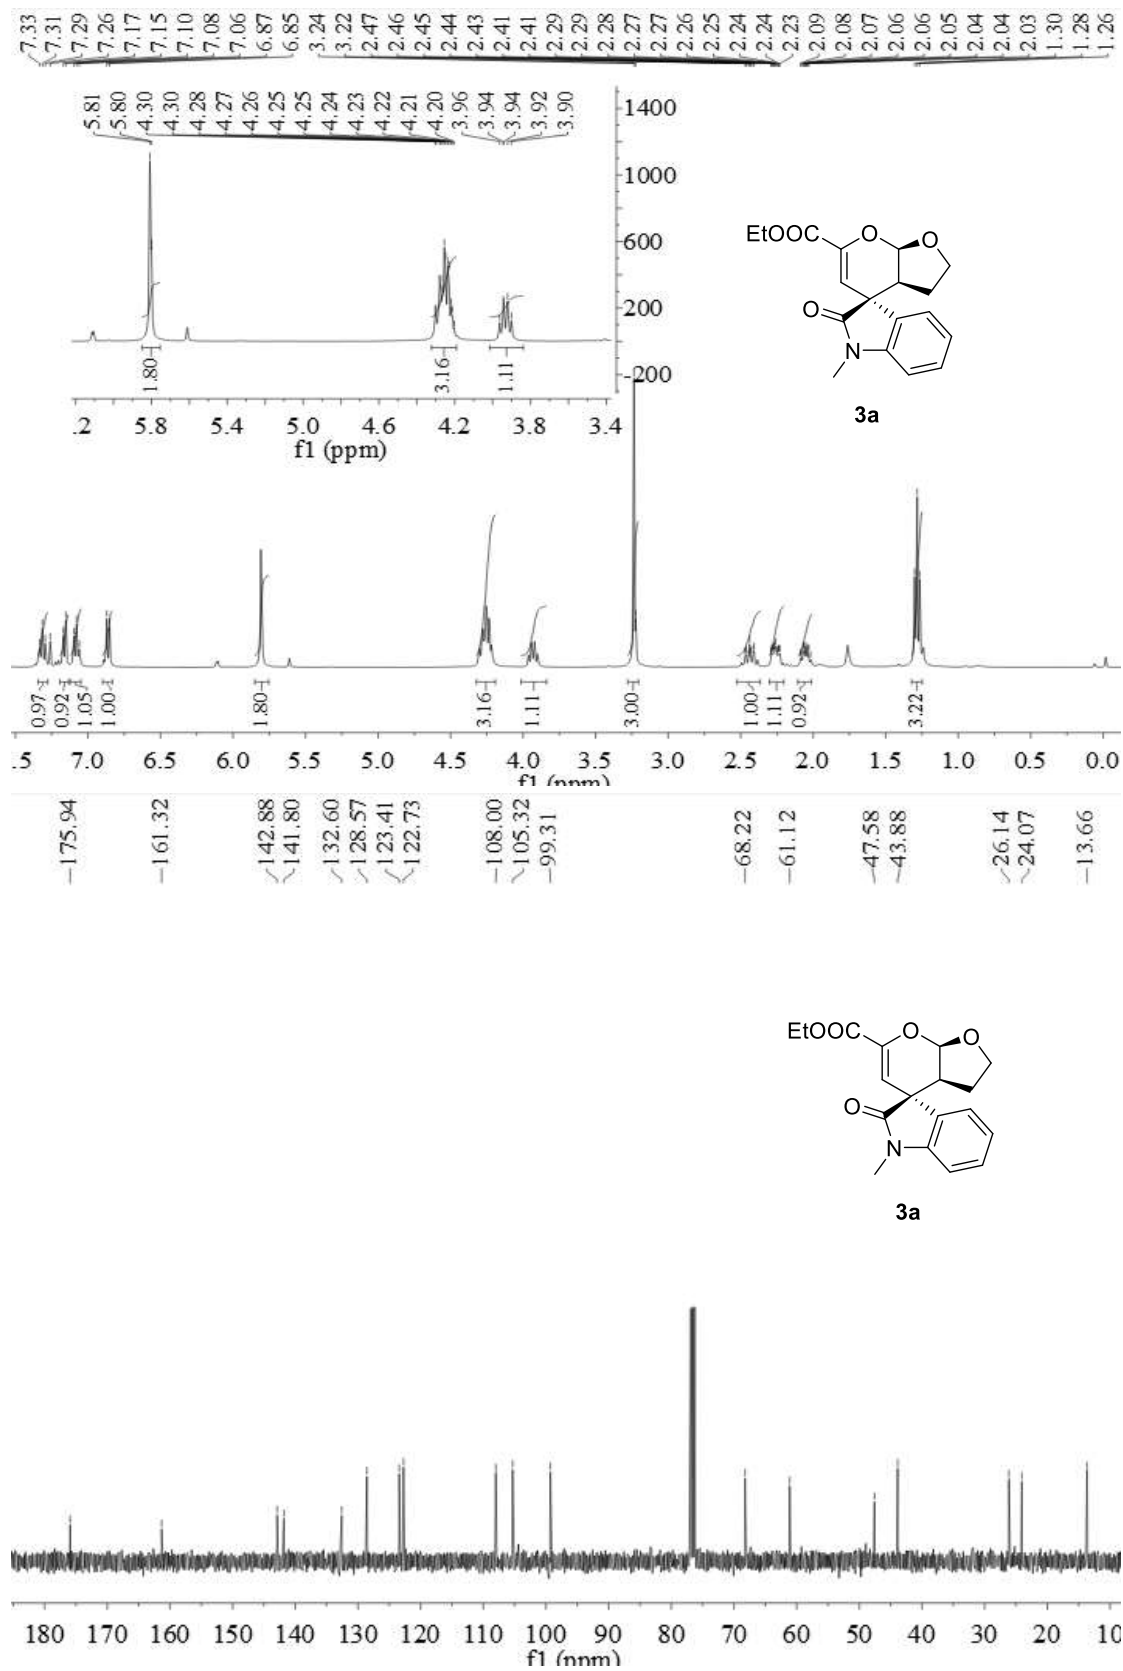

**Ethyl-(3a*S*,4*S*,7a*R*)-5'-chloro-1'-methyl-2'-oxo-2,3,3a,7a-tetrahydrospiro[furo  
[2,3-*b*]pyran-4,3'-indoline]-6-carboxylate **3b****

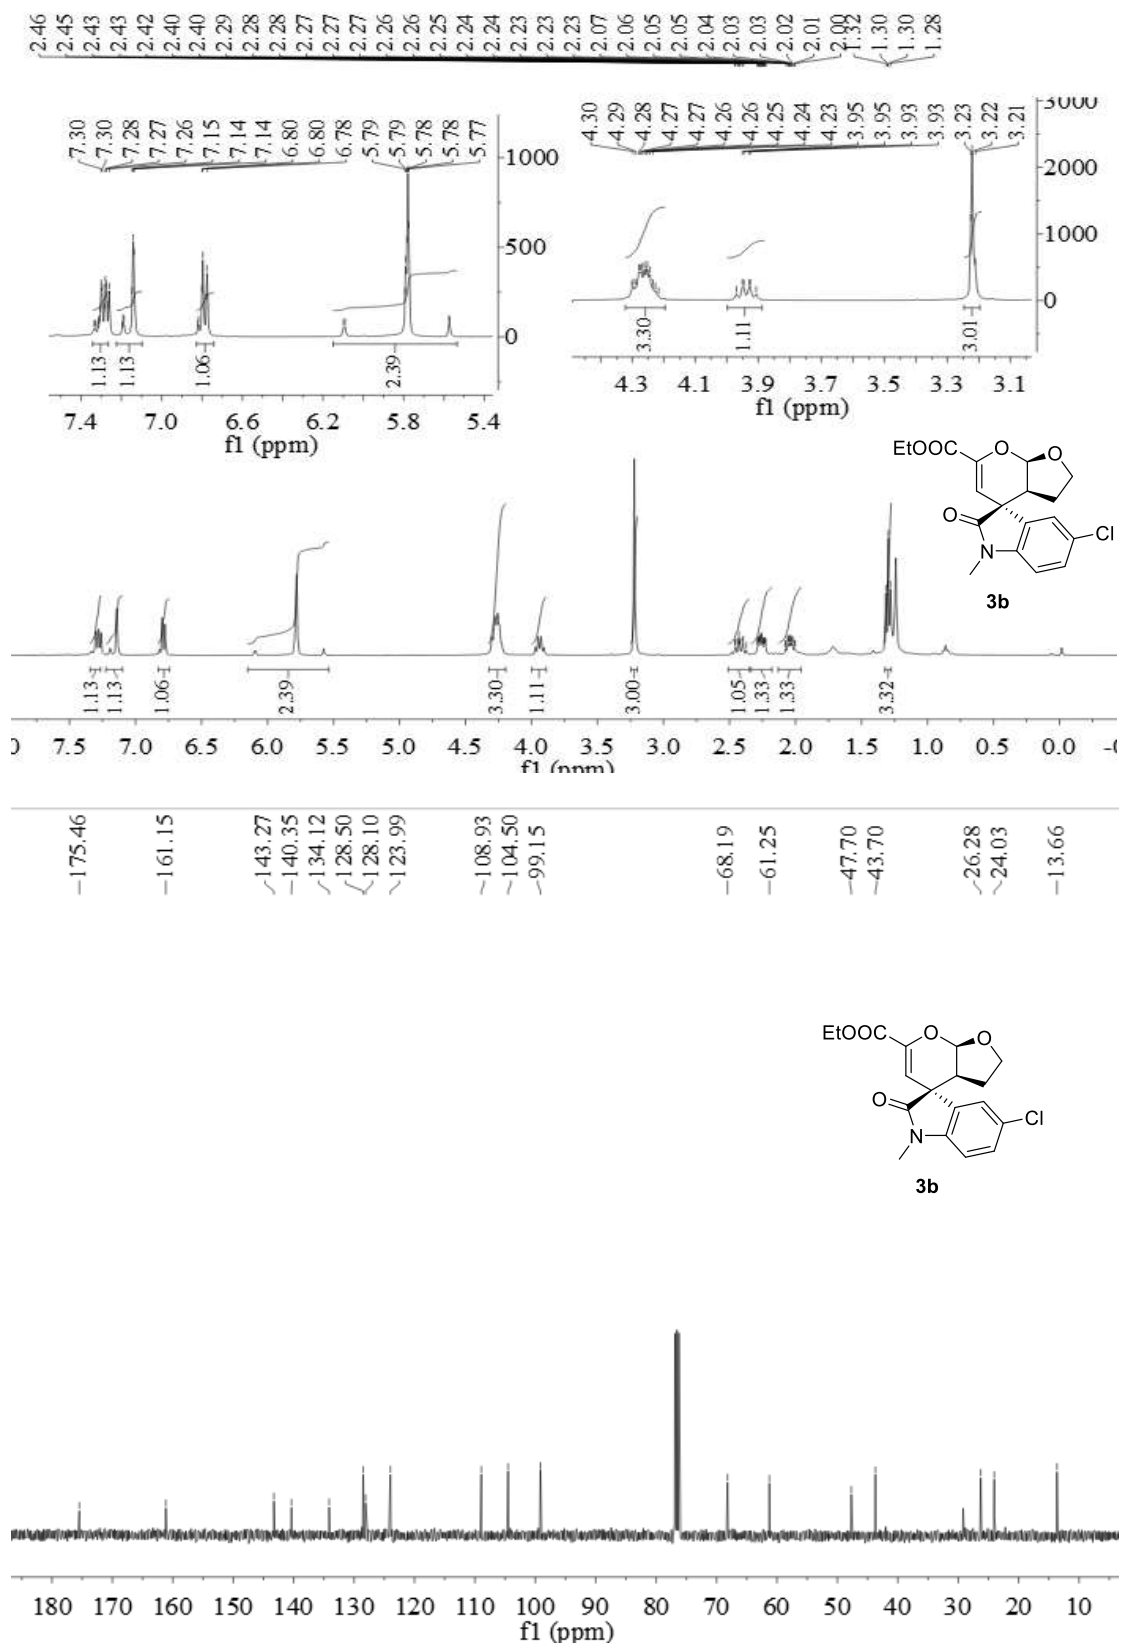

**Ethyl-(3a*S*,4*S*,7a*R*)-5'-bromo-1'-methyl-2'-oxo-2,3,3a,7a-tetrahydrospiro[furo[2,3-*b*]pyran-4,3'-indoline]-6-carboxylate **3c****

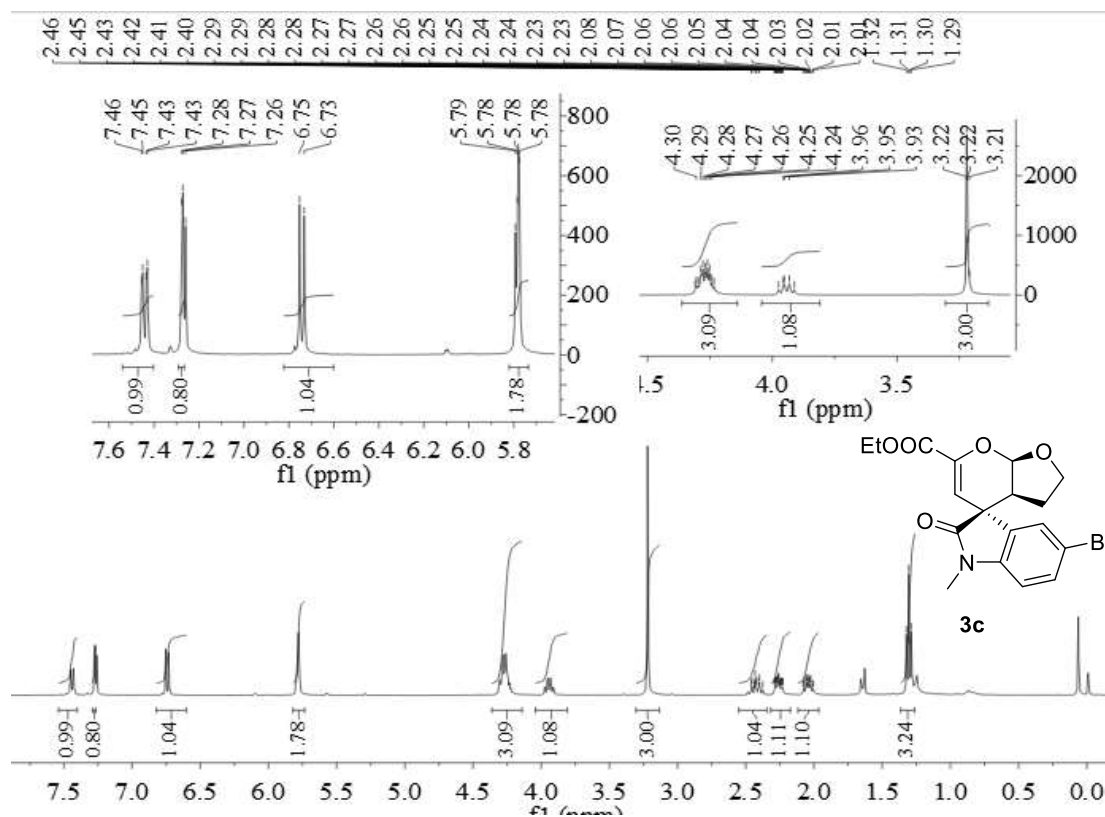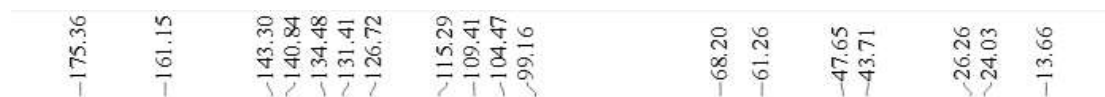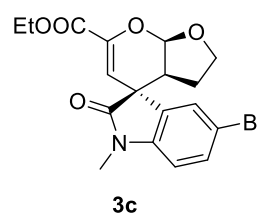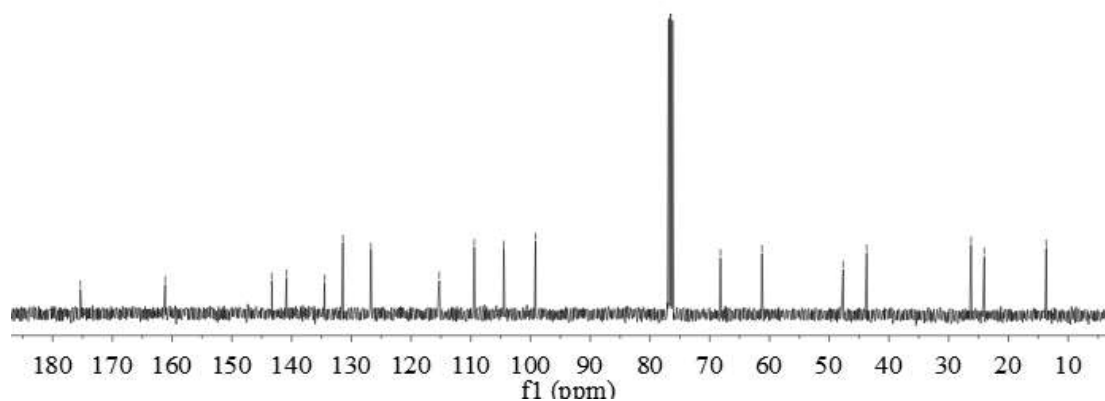



**Ethyl-(3a*S*,4*S*,7a*R*)-5'-methoxy-1'-methyl-2'-oxo-2,3,3a,7a-tetrahydrospiro[furo [2,3-*b*]pyran-4,3'-indoline]-6-carboxylate 3d**

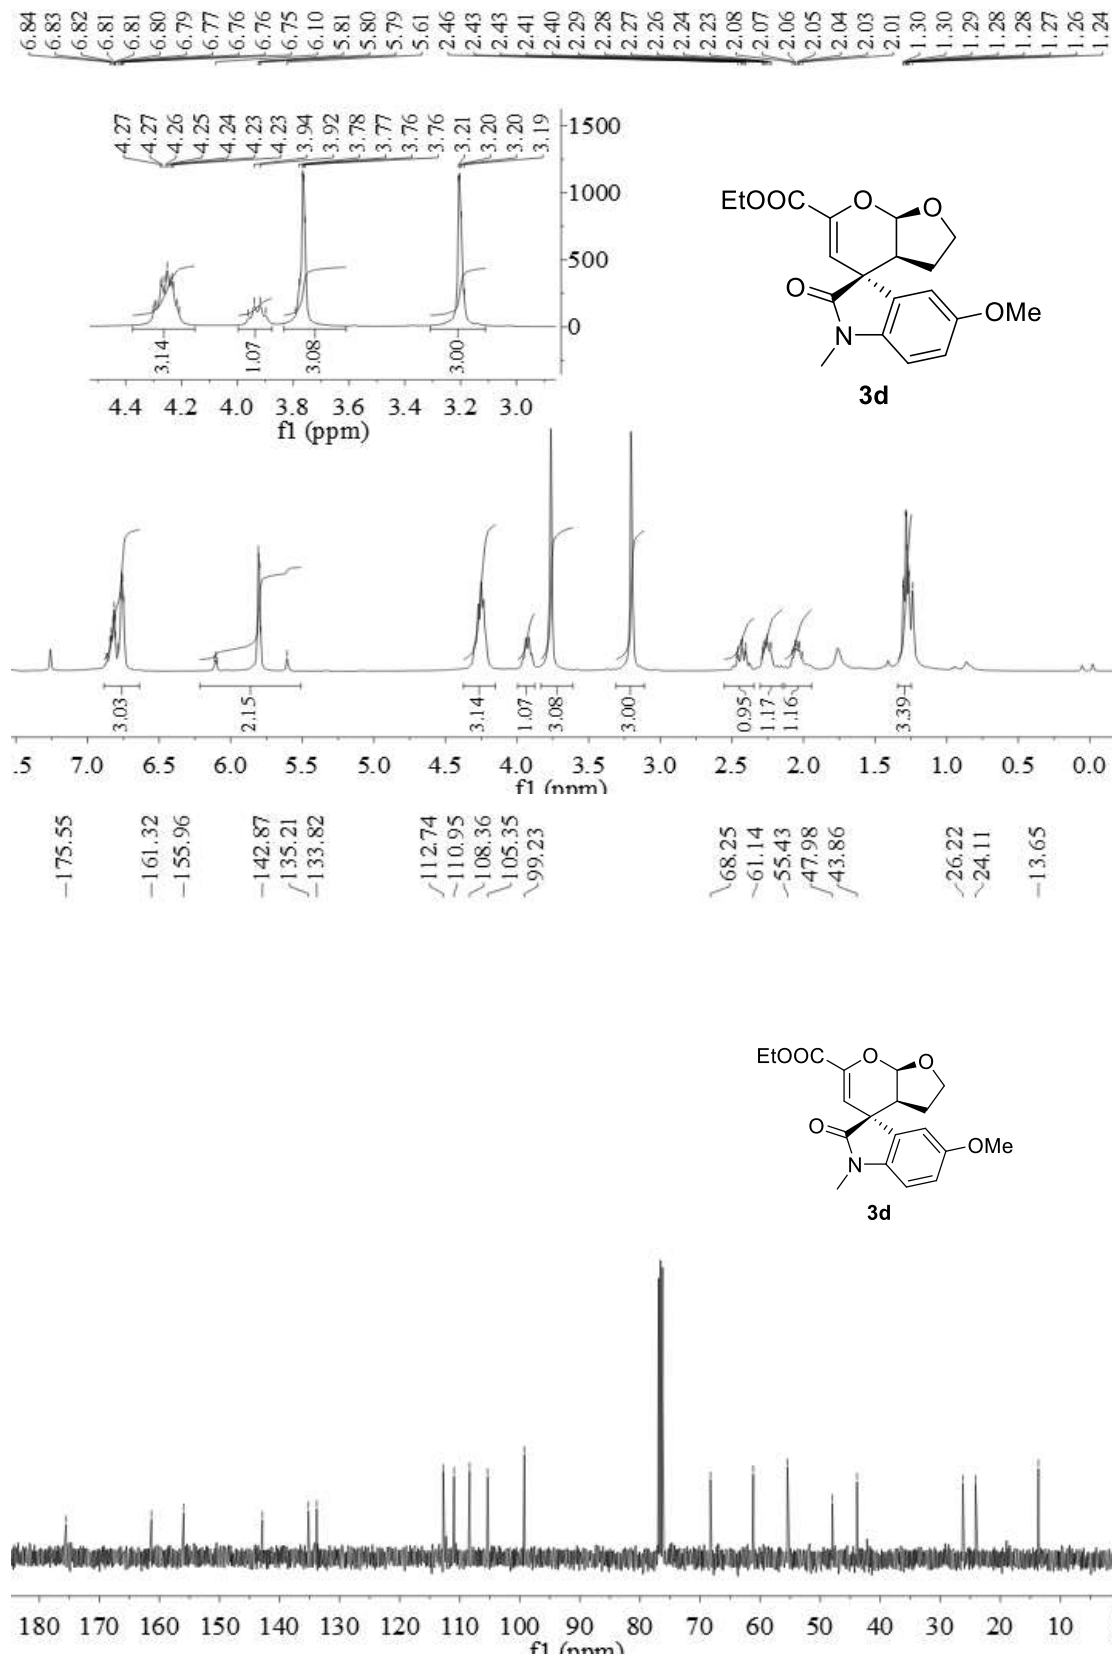

**Ethyl-(3a*S*,4*S*,7a*R*)-6'-chloro-1'-methyl-2'-oxo-2,3,3a,7a-tetrahydrospiro[furo**

[2,3-b]pyran-4,3'-indoline]-6-carboxylate **3e**

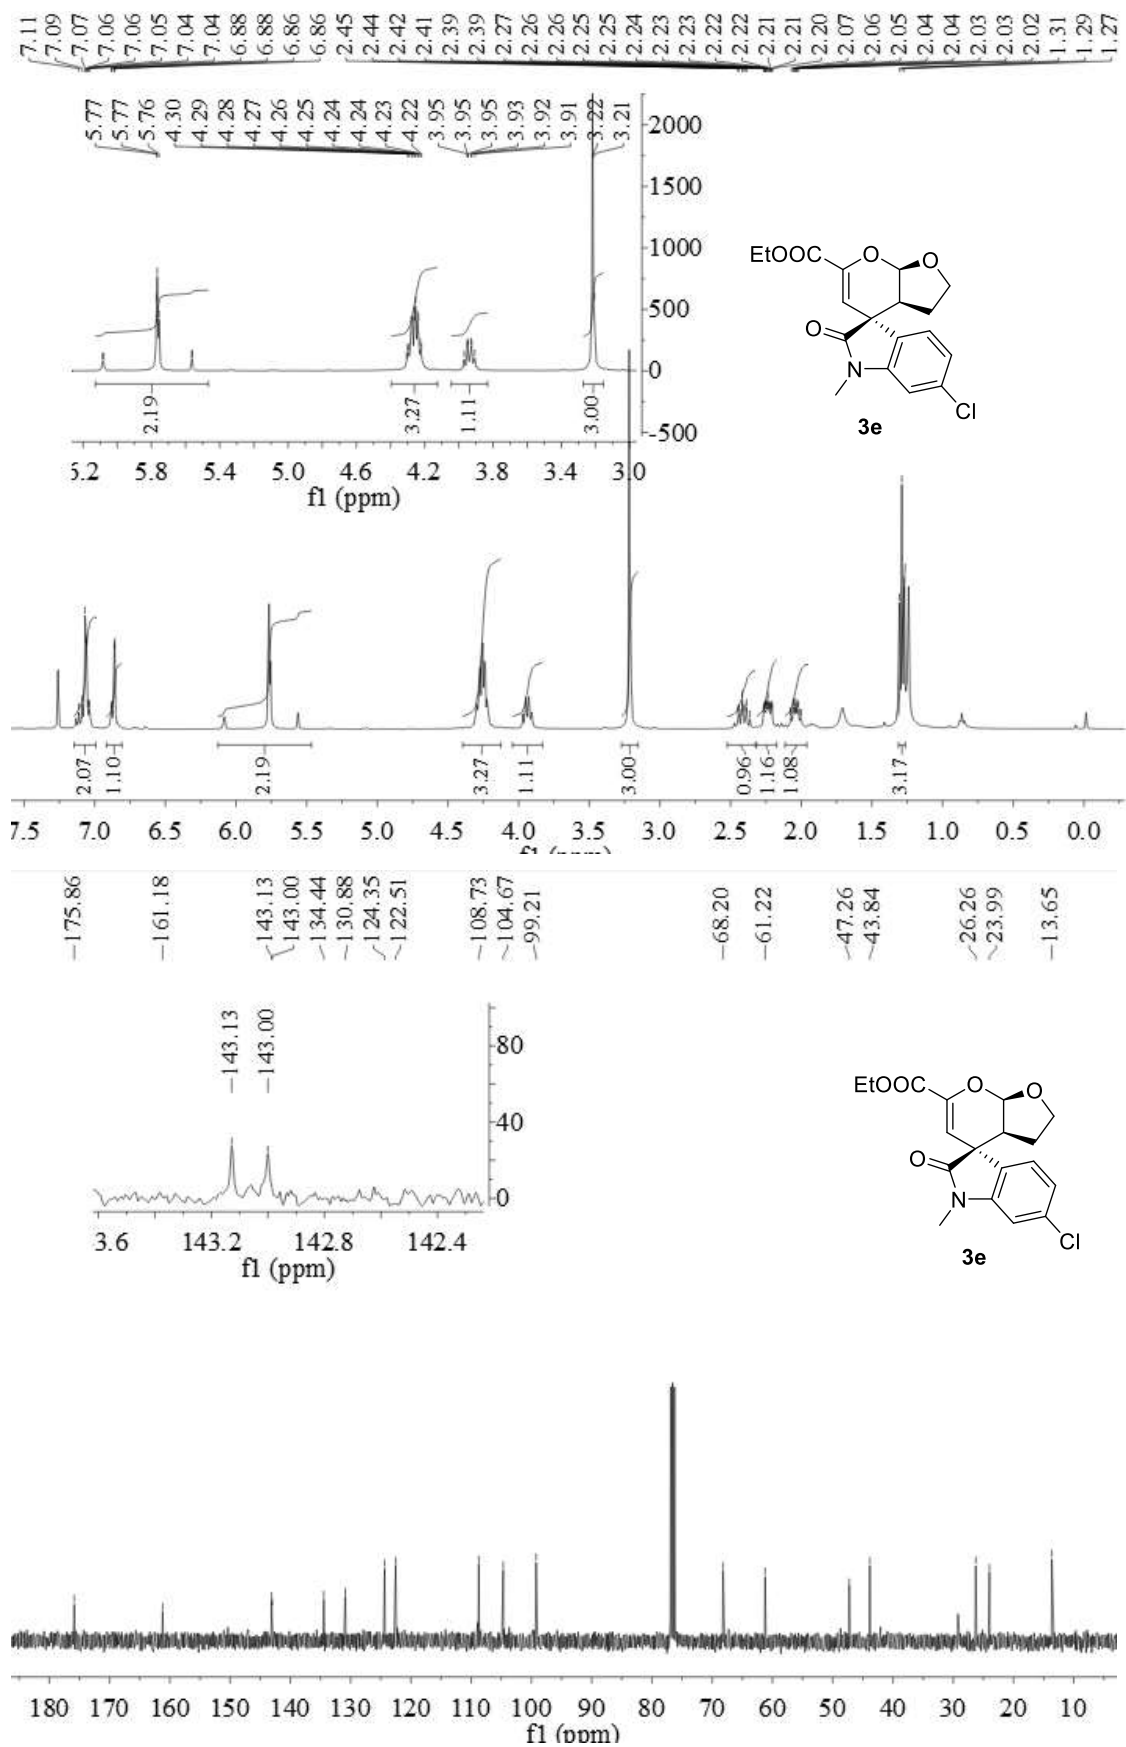

**Ethyl-(3*R*)-5-bromo-2'-methoxy-1,2'-dimethyl-2-oxo-2',3'-dihydrospiro  
[indoline-3,4'-pyran]-6'-carboxylate 5**

7.75  
7.74  
7.41  
7.41  
7.39  
7.39  
6.72  
6.70

-5.77

4.26  
4.25  
4.24  
4.22  
4.20  
4.19

-3.39  
-3.20

2.52  
2.48  
2.12  
2.09

1.63  
1.29  
1.27  
1.25

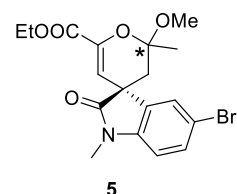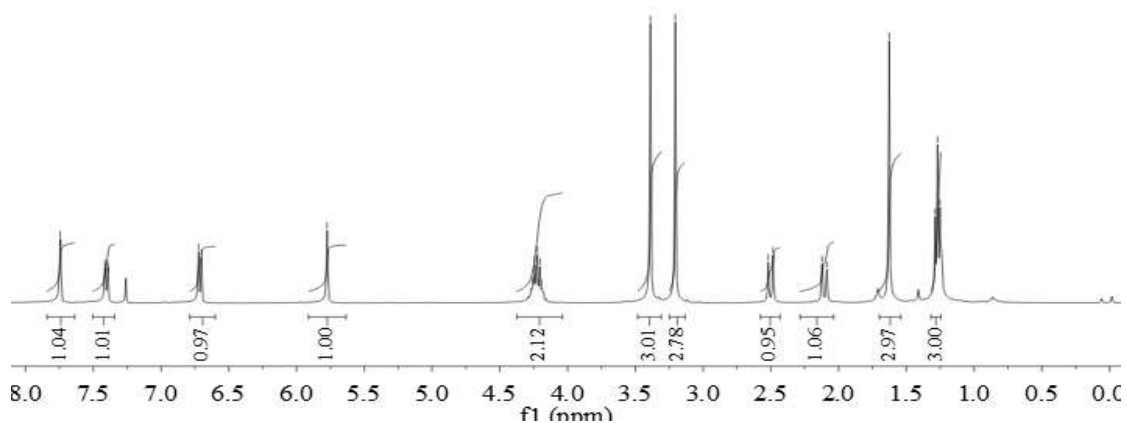

-176.95  
-161.74

142.01  
141.48  
133.83  
130.84  
130.26

115.13  
110.48  
108.98

-98.56

-60.90

48.63  
47.22  
39.58

26.42  
22.08  
13.65

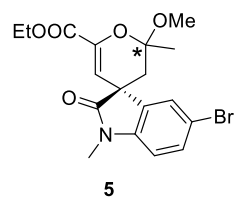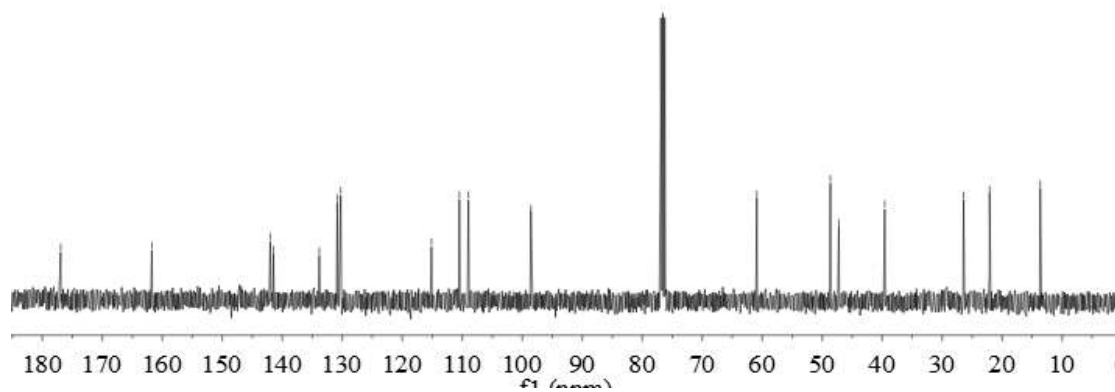

**Ethyl-(*S,E*)-3-(5-bromo-1-methyl-2-oxo-3-(2-(phenylthio)vinyl)indolin-3-yl)-2-oxopropanoate 6**

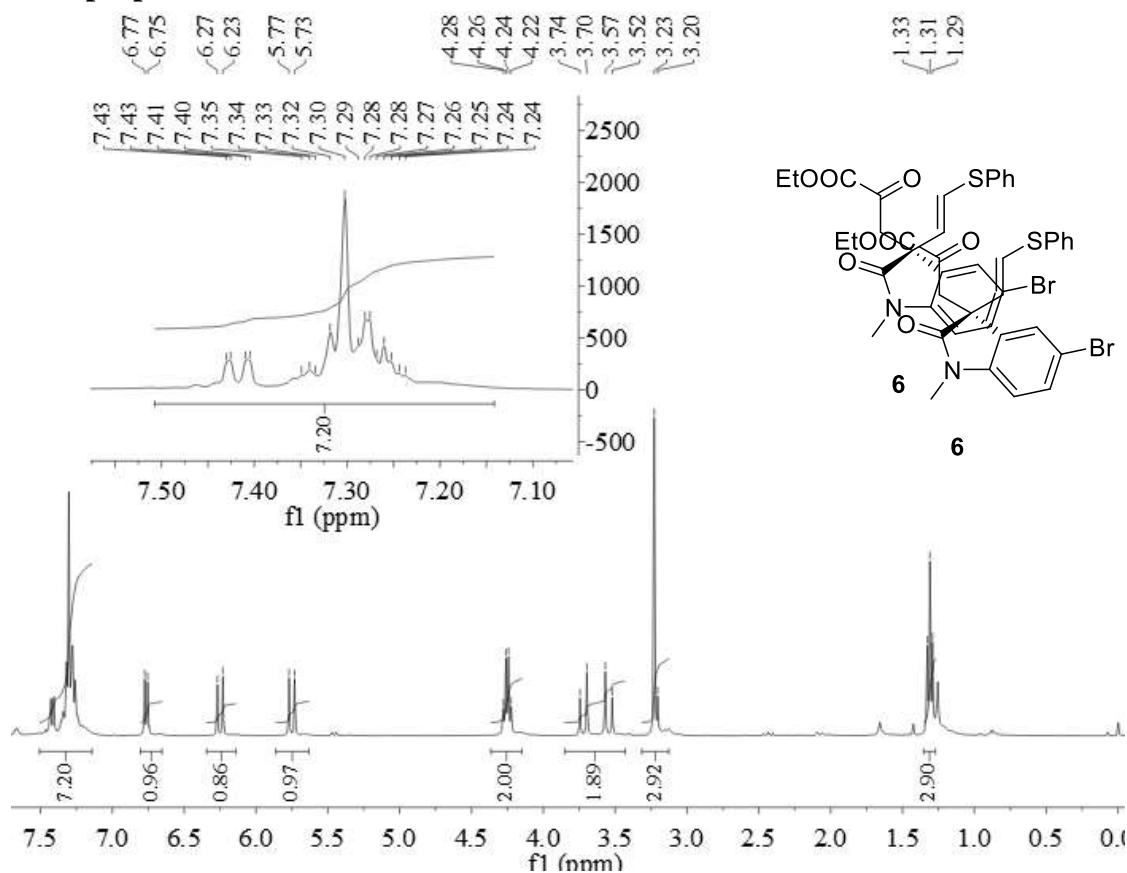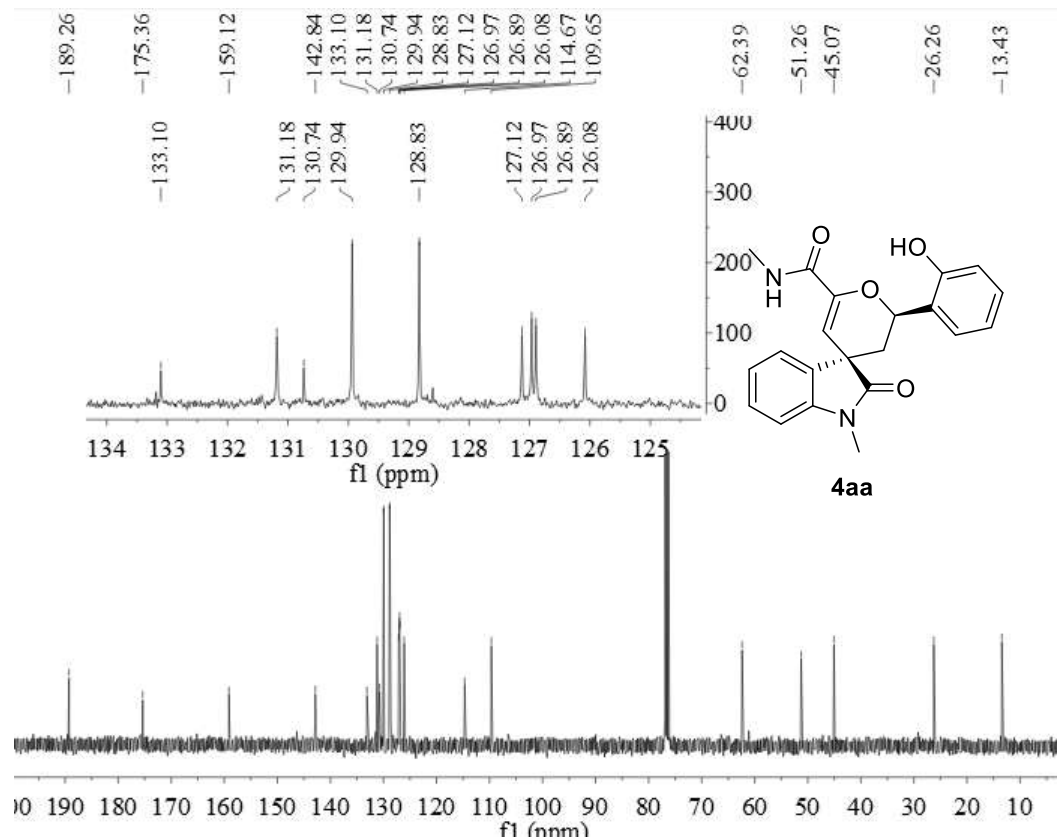

**Ethyl-3-(5-bromo-3-(2,3-dimethyl-3H-indol-3-yl)-1-methyl-2-oxindolin-3-yl)-2-oxopropanoate 7**

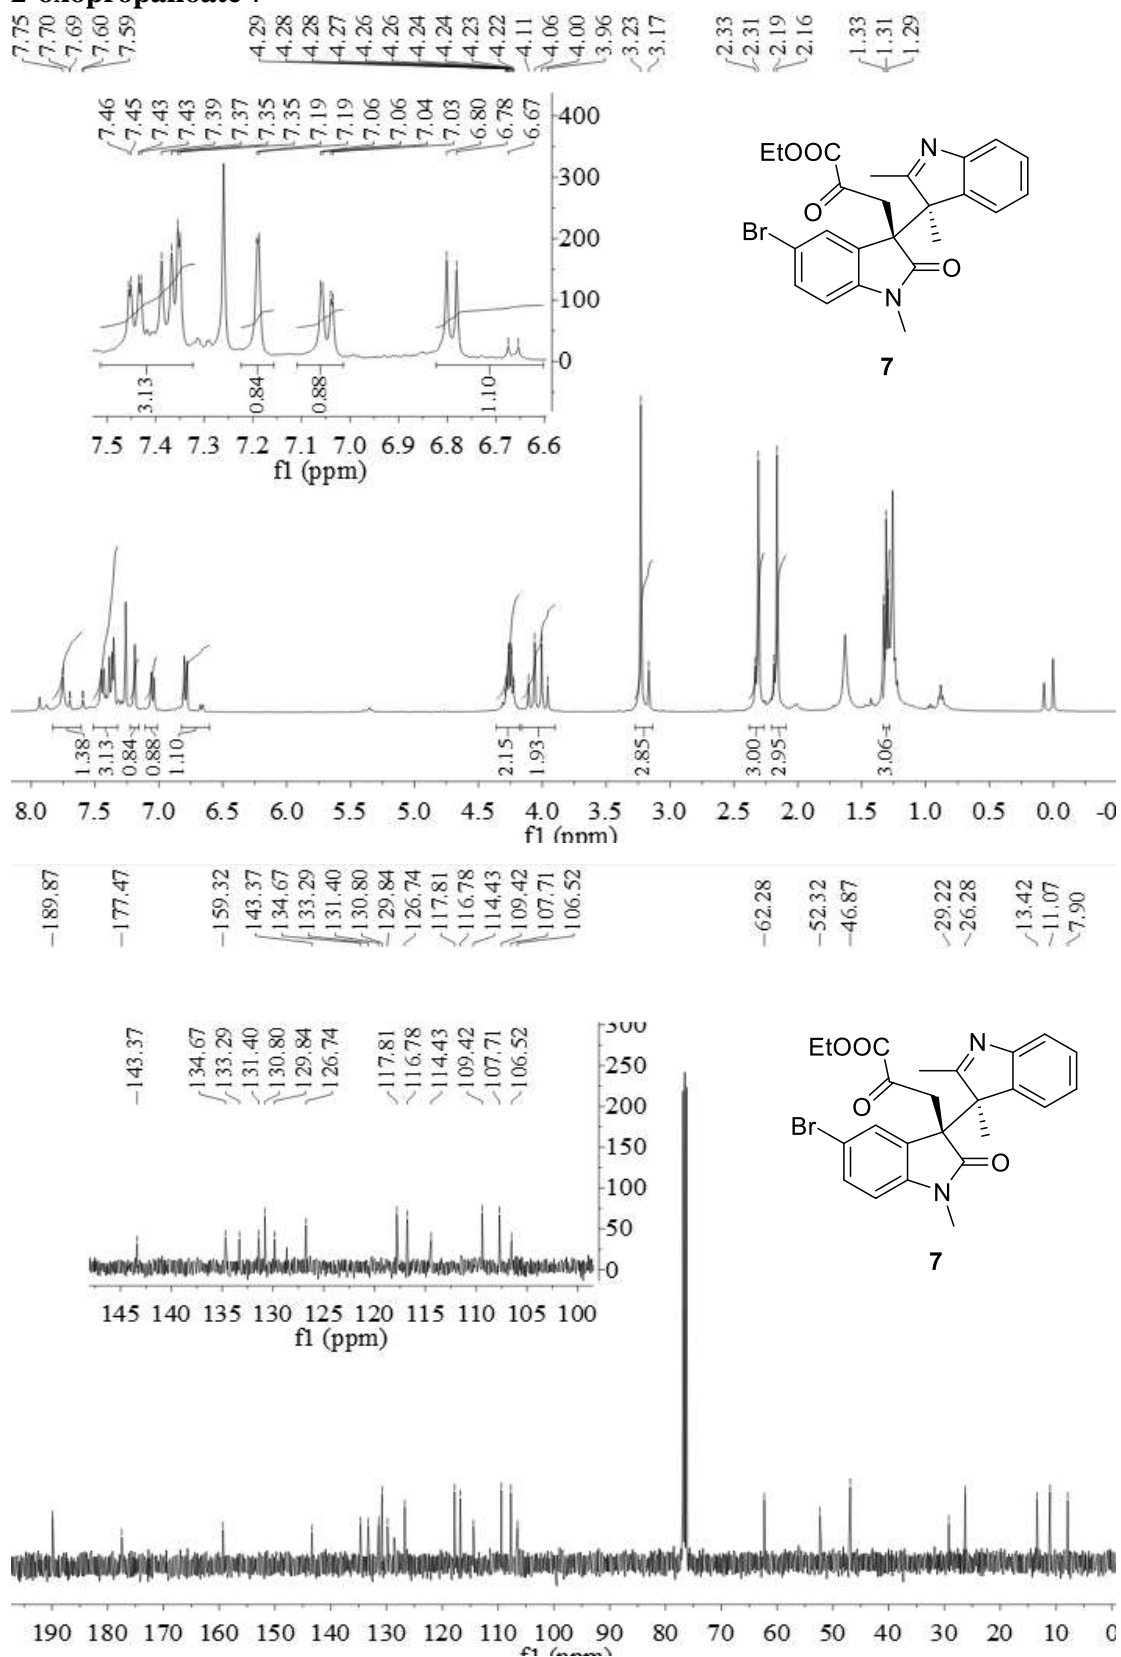

**Ethyl (2'*R*,3*R*)-2'-(2-hydroxyphenyl)-1-methyl-2-oxo-2',3'-dihydrospiro[indoline-3,4'-pyran]-6'-carboxylate **9a****

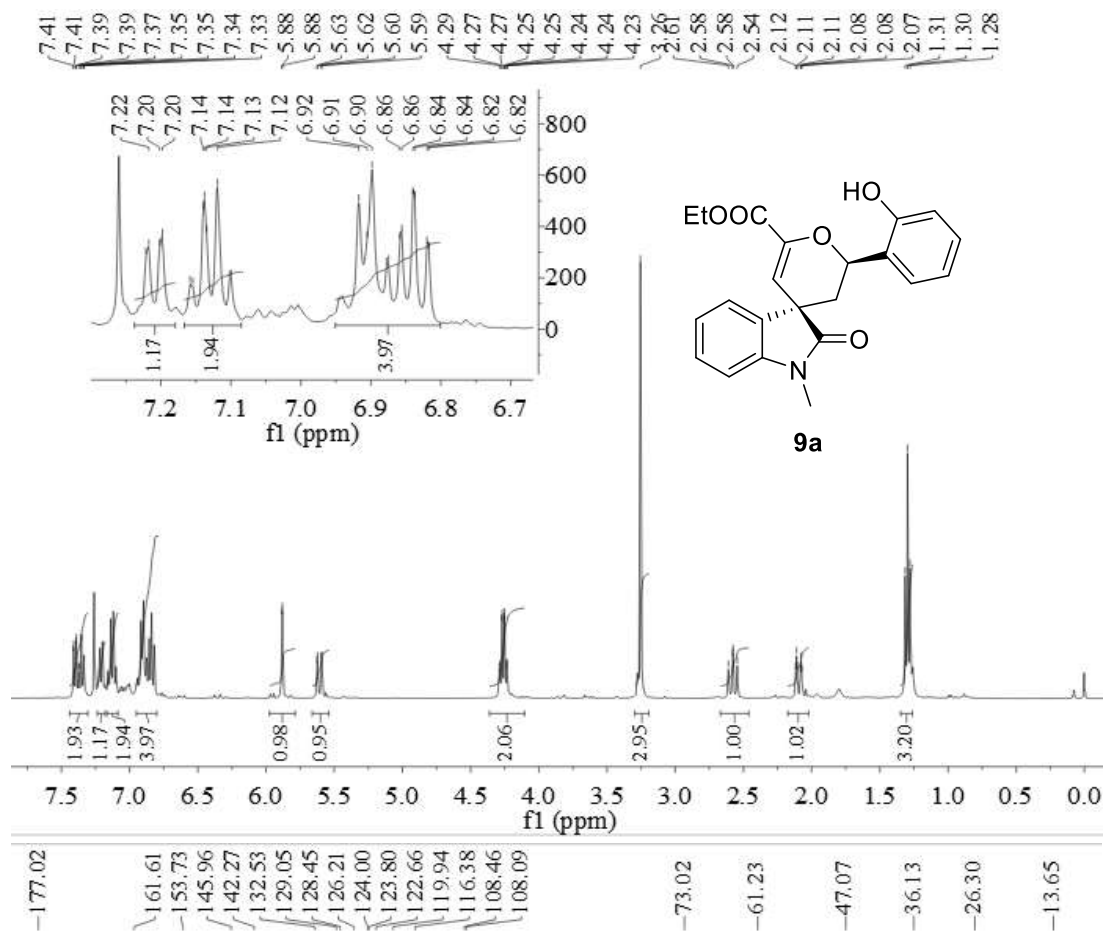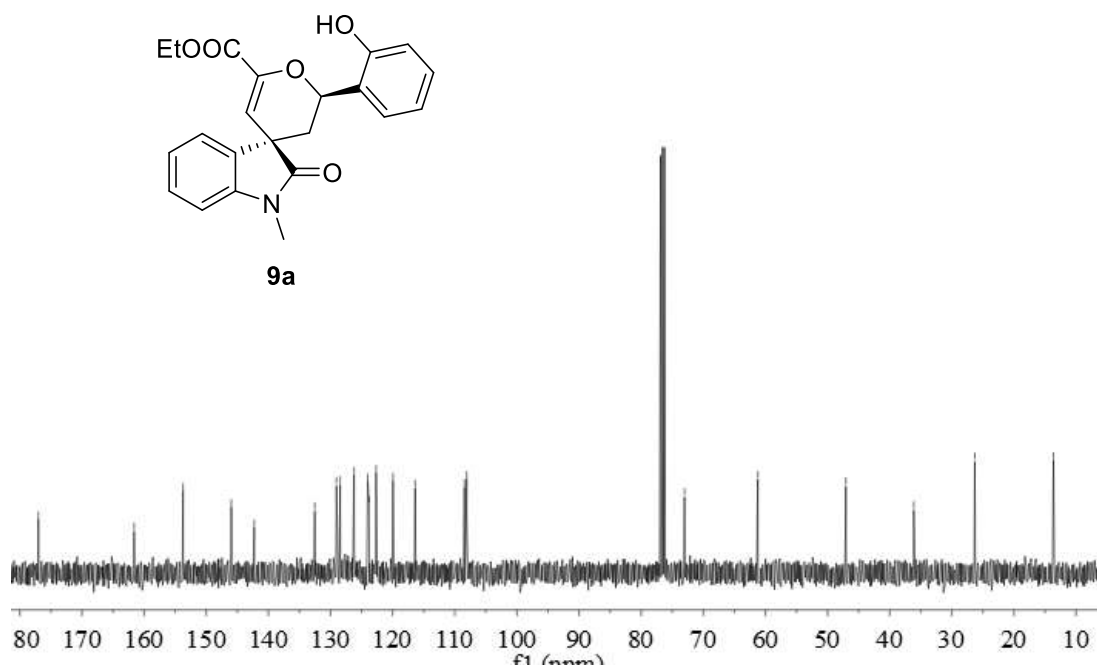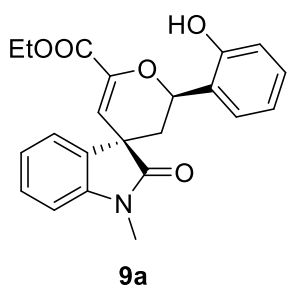

**Ethyl (2'*R*,3*R*)-1-allyl-2'-(2-hydroxyphenyl)-2-oxo-2',3'-dihydrospiro[indoline-3,4'-pyran]-6'-carboxylate **9b****

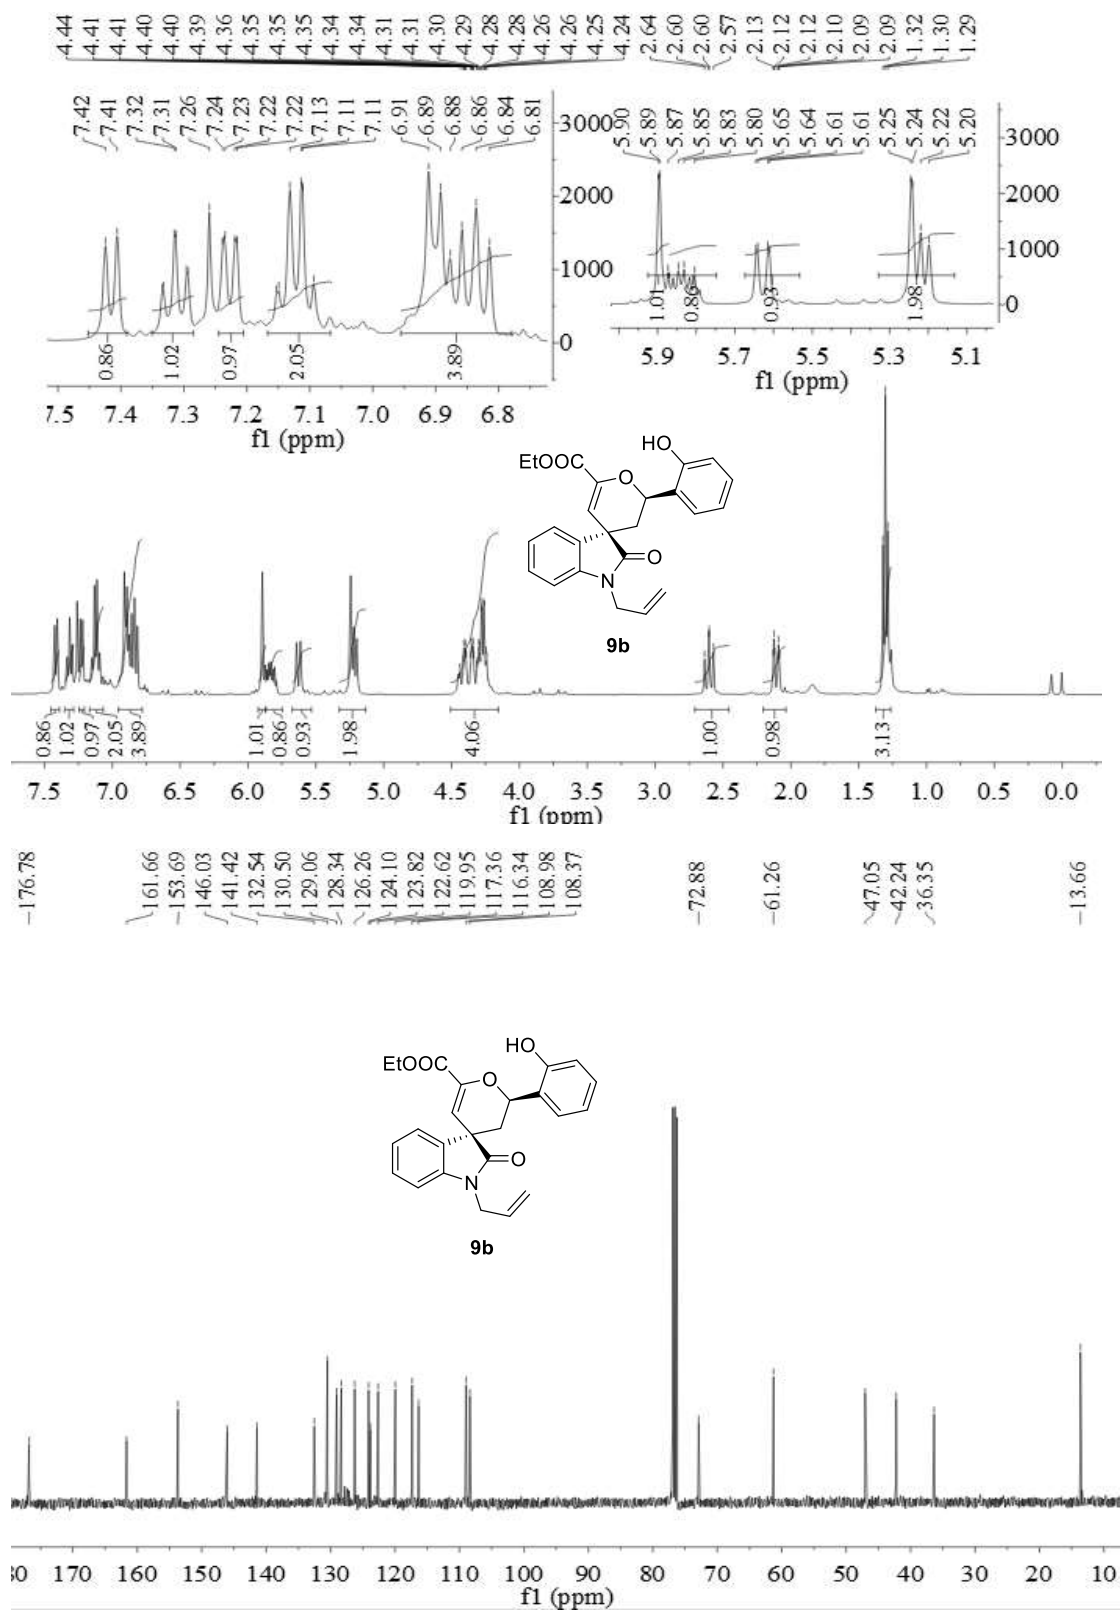

**Ethyl (2'*R*,3*R*)-2'-(2-hydroxyphenyl)-1-(methoxymethyl)-2-oxo-2',3'-dihydro spiro[indoline-3,4'-pyran]-6'-carboxylate **9c****

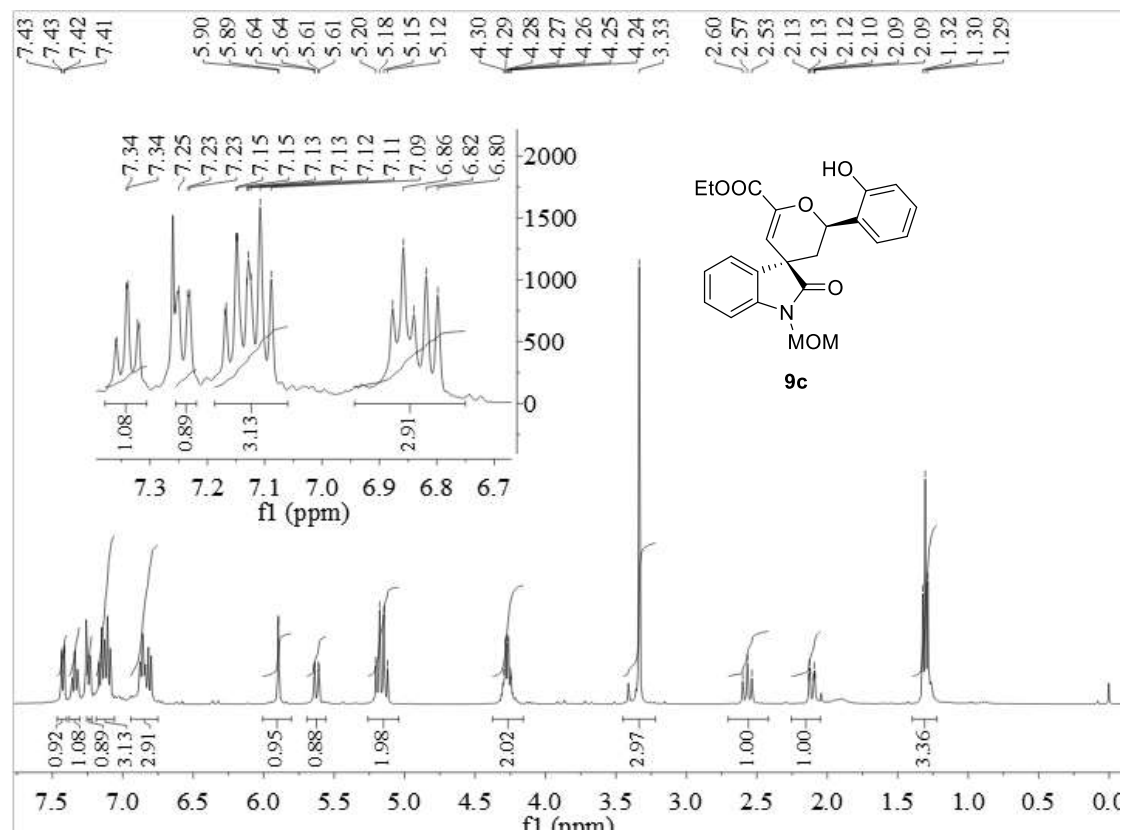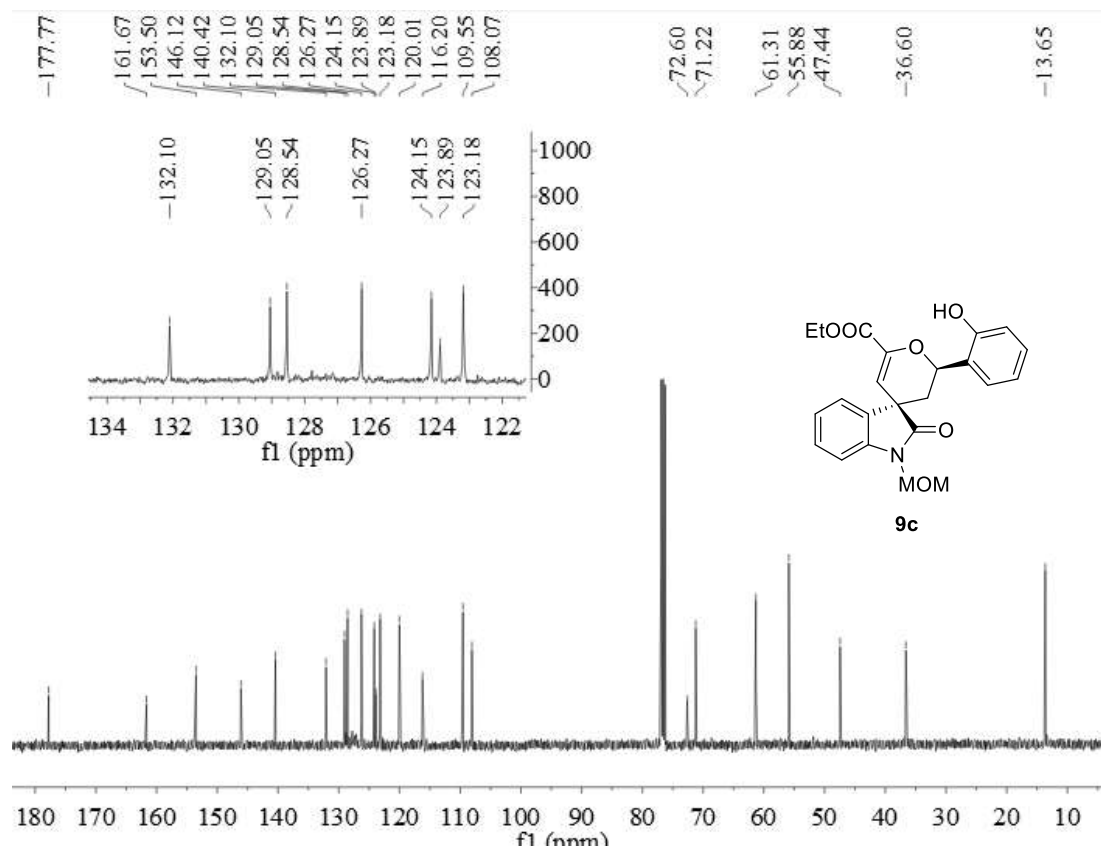



**Ethyl (2'*R*,3*R*)-2'-(2-hydroxyphenyl)-1,5-dimethyl-2-oxo-2',3'-dihydro  
spiro[indoline-3,4'-pyran]-6'-carboxylate **9e****

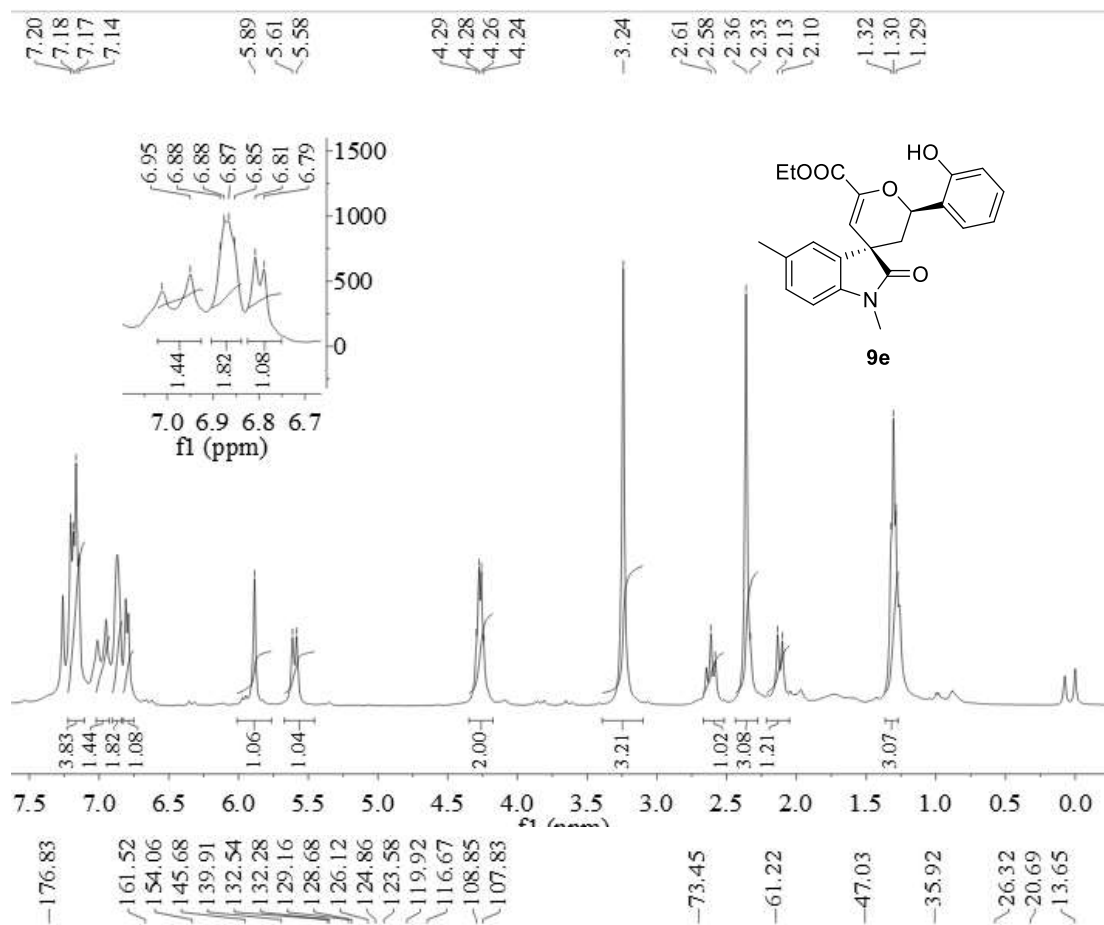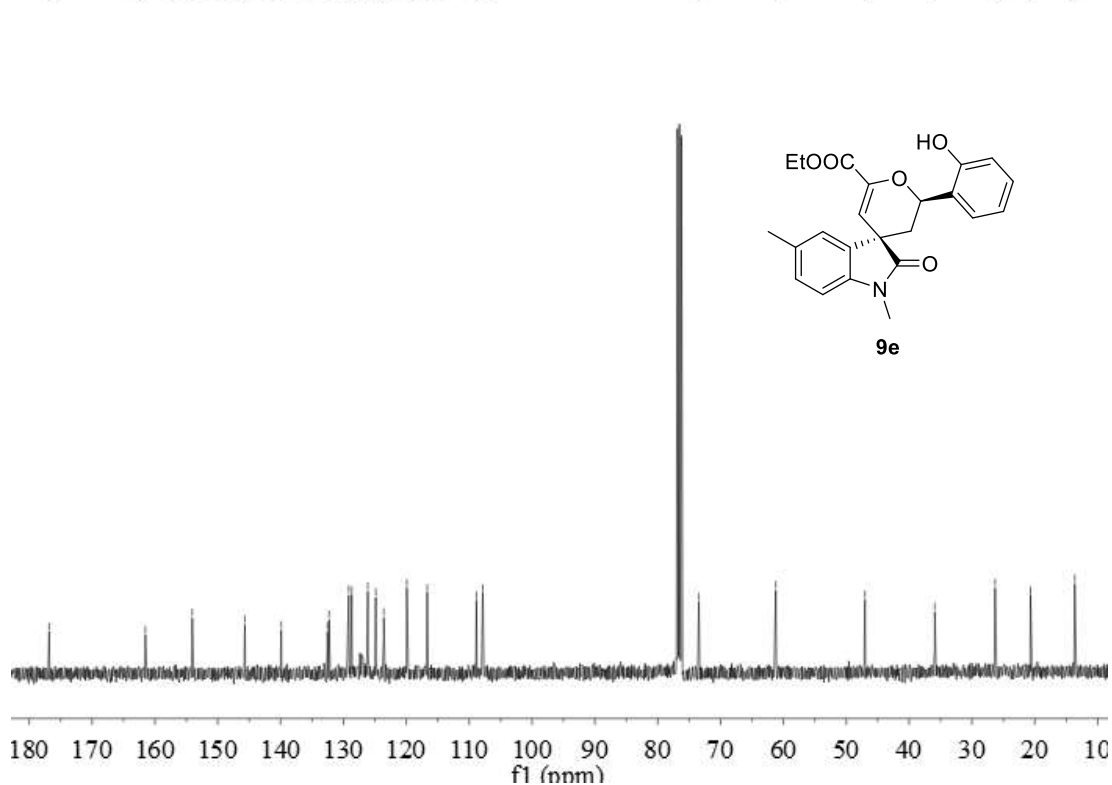

**Ethyl (2'*R*,3*R*)-2'-(2-hydroxyphenyl)-5-methoxy-1-methyl-2-oxo-2',3'-dihydro spiro[indoline-3,4'-pyran]-6'-carboxylate **9f****

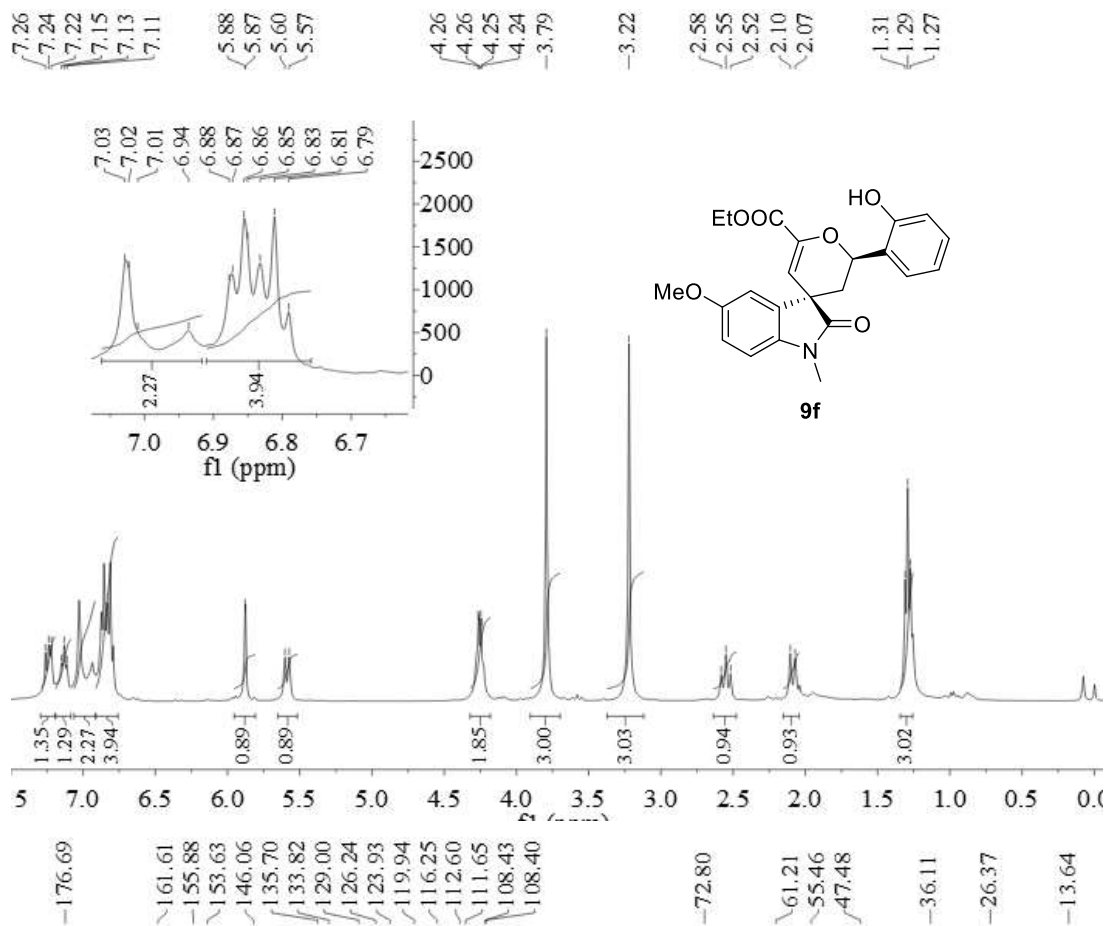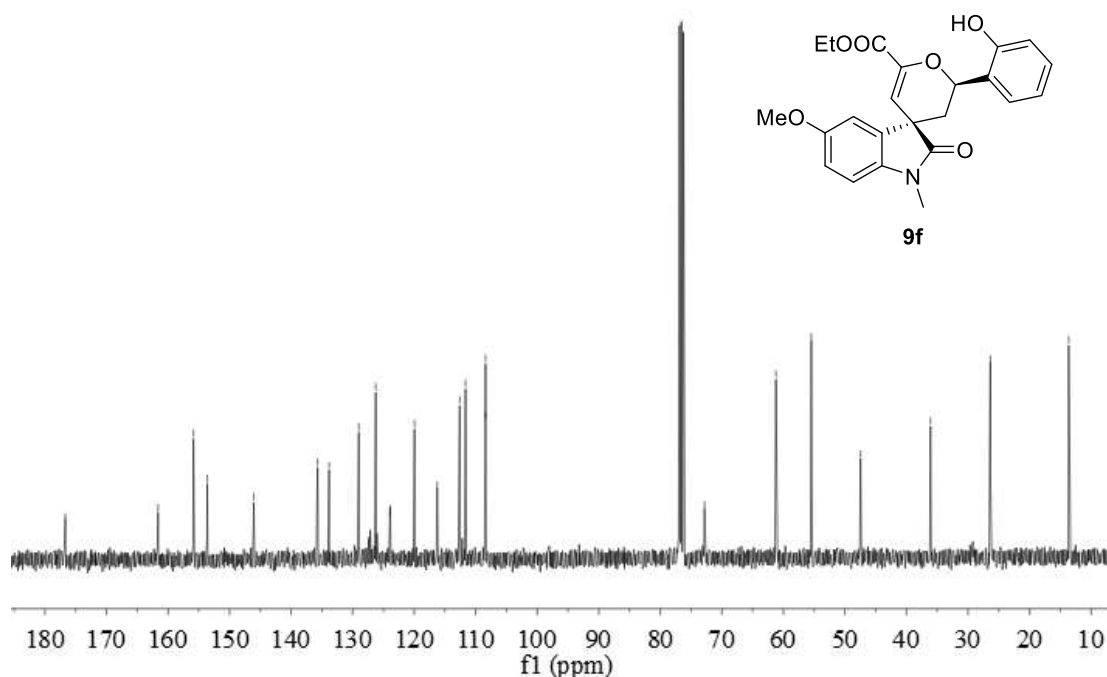

**Ethyl (2'*R*,3*R*)-5-fluoro-2'-(2-hydroxyphenyl)-1-methyl-2-oxo-2',3'-dihydro spiro[indoline-3,4'-pyran]-6'-carboxylate **9g****

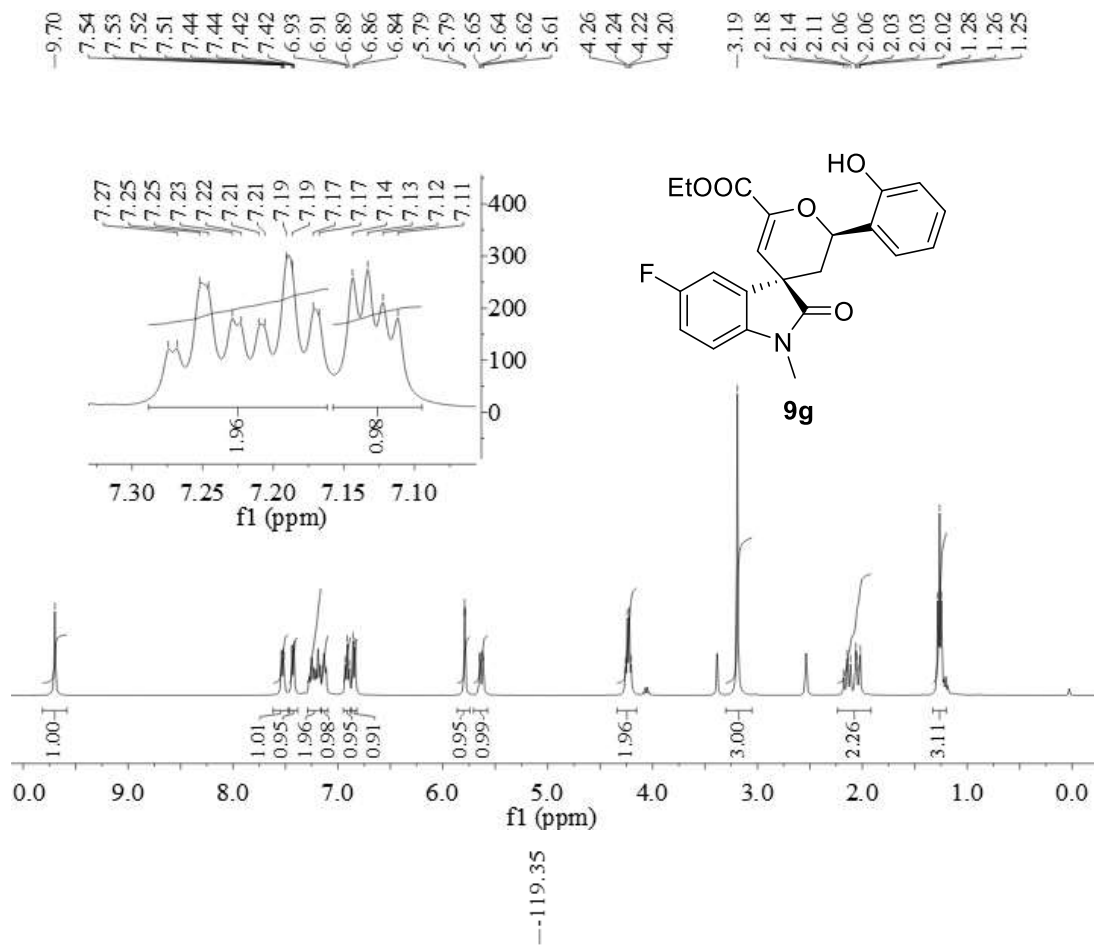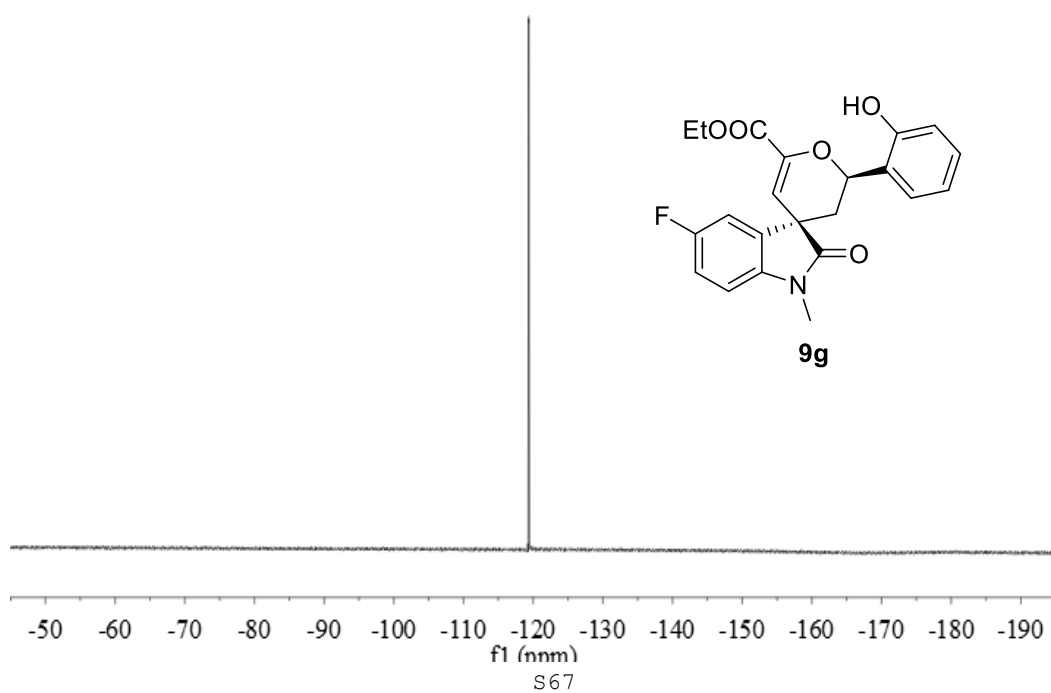

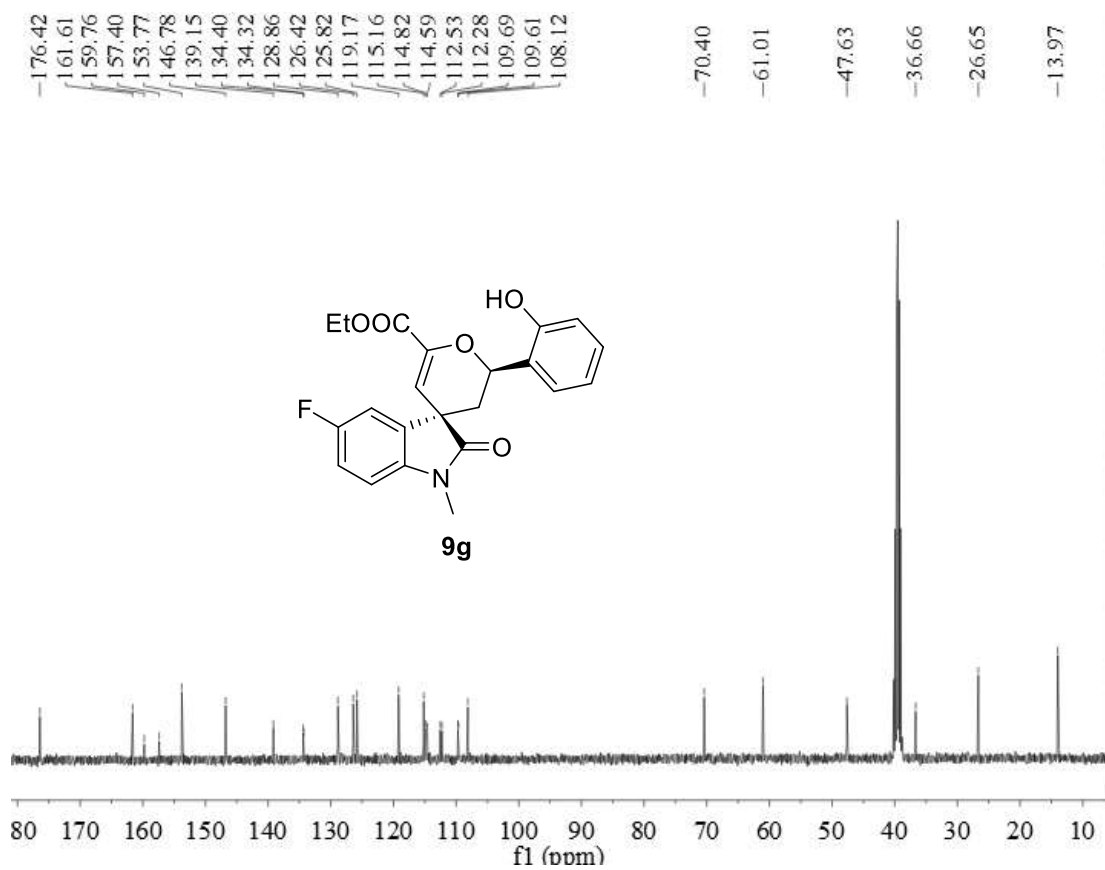

**Ethyl (2'*R*,3*R*)-5-chloro-2'-(2-hydroxyphenyl)-1-methyl-2-oxo-2',3'-dihydro spiro[indoline-3,4'-pyran]-6'-carboxylate **9h****

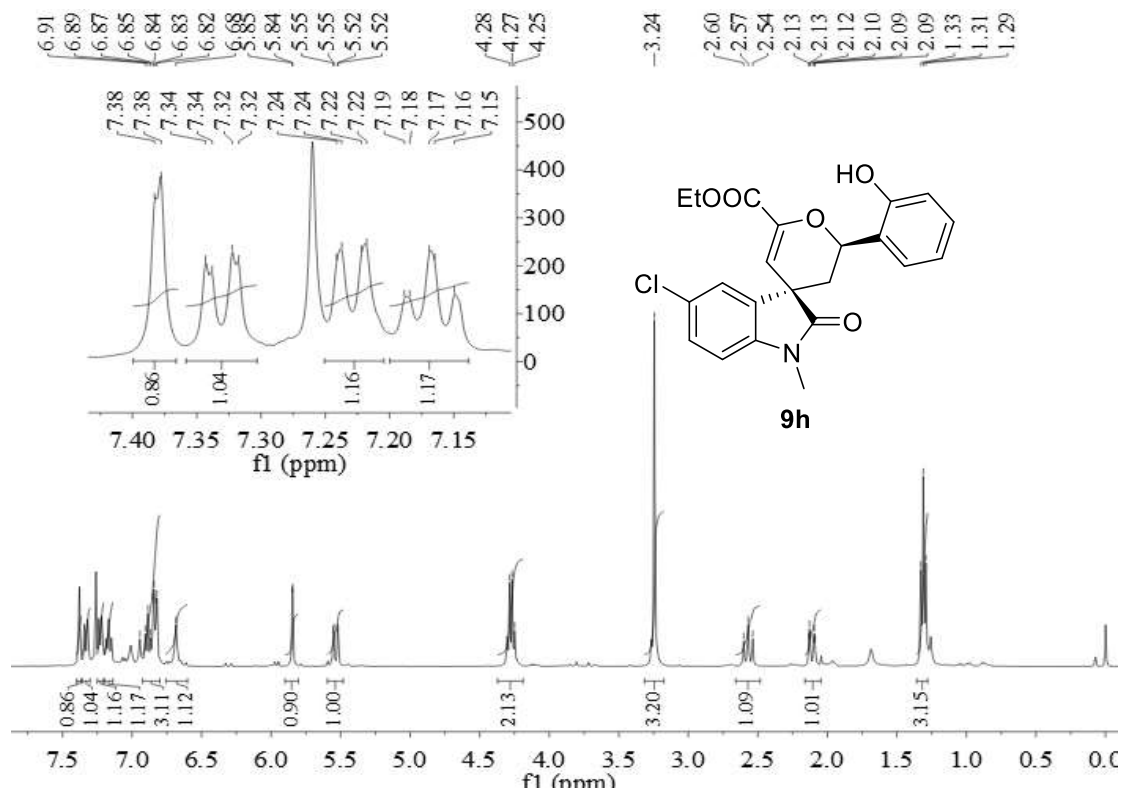

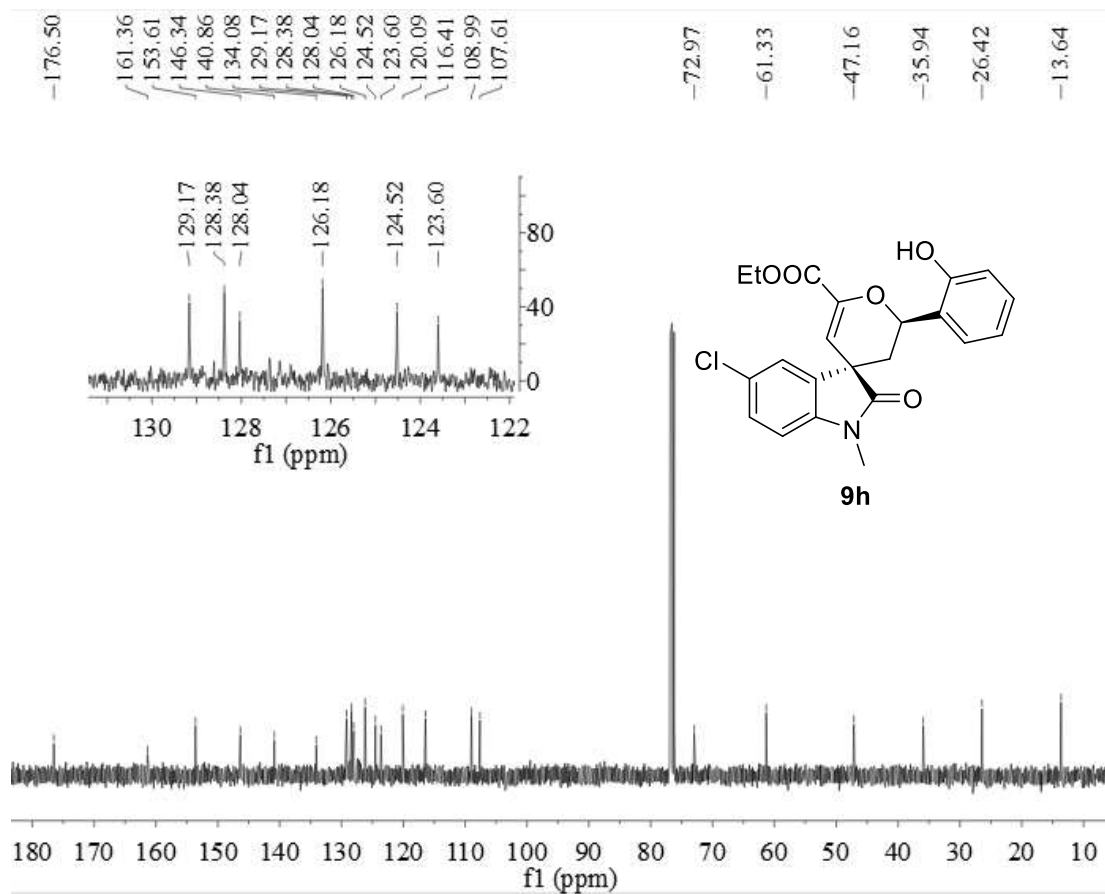

**Ethyl (2*R*,3*R*)-5-bromo-2'-(2-hydroxyphenyl)-1-methyl-2-oxo-2',3'-dihydro spiro[indoline-3,4'-pyran]-6'-carboxylate **9i****

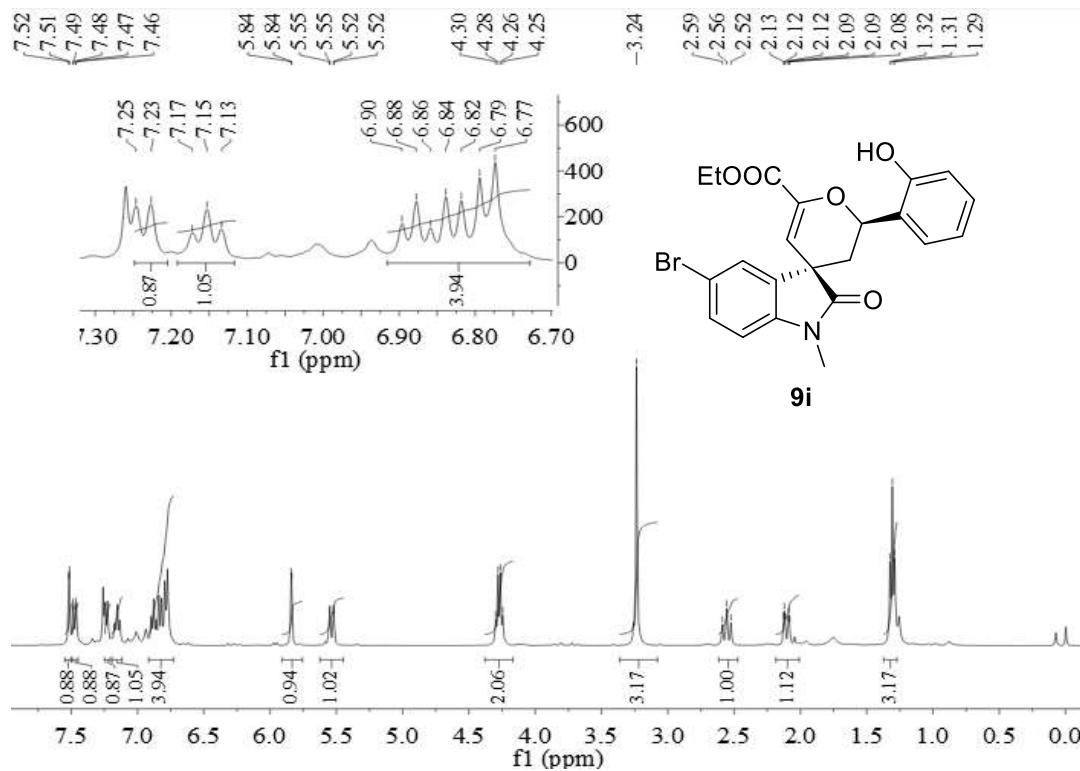

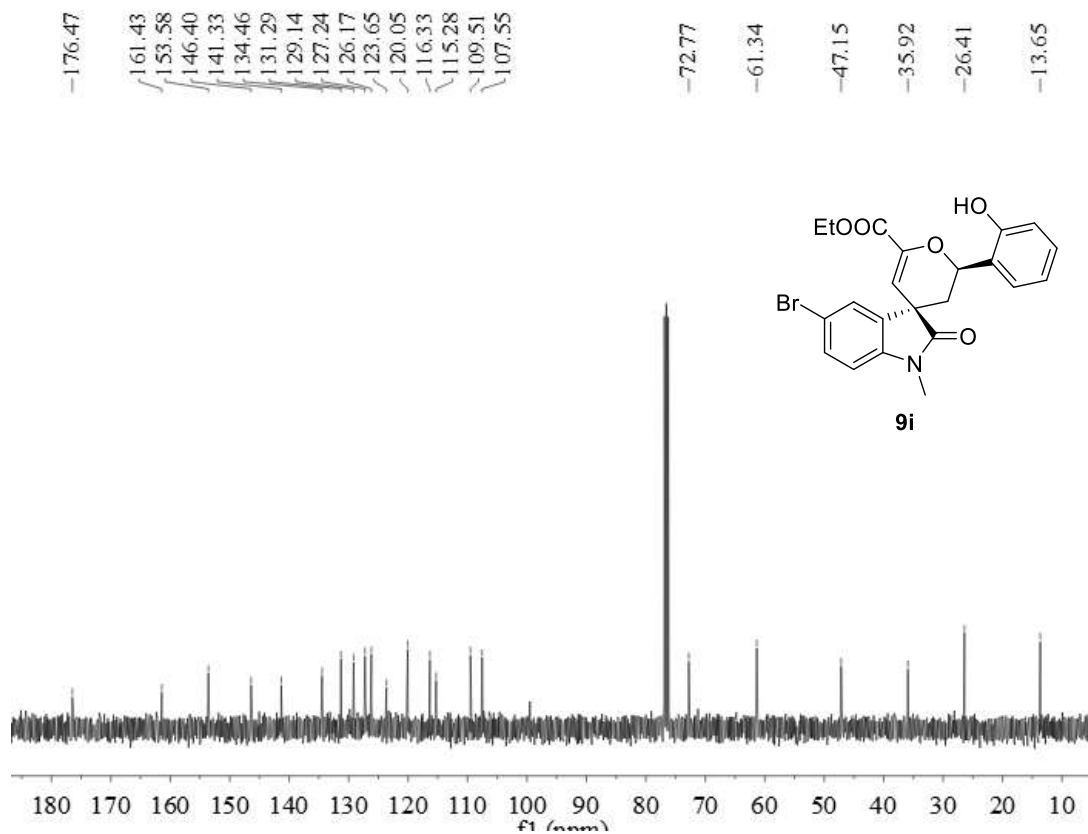

**Ethyl (2'*R*,3*R*)-6-chloro-2'-(2-hydroxyphenyl)-1-methyl-2-oxo-2',3'-dihydro spiro[indoline-3,4'-pyran]-6'-carboxylate **9j****

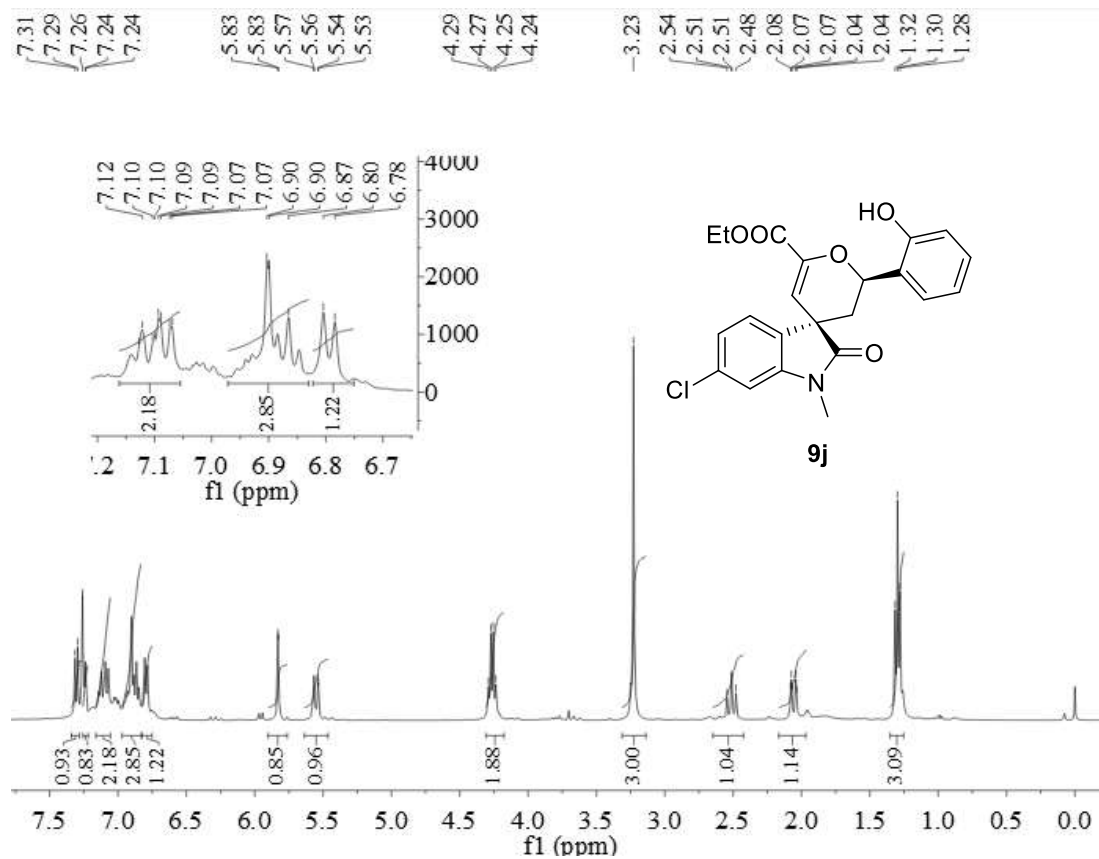

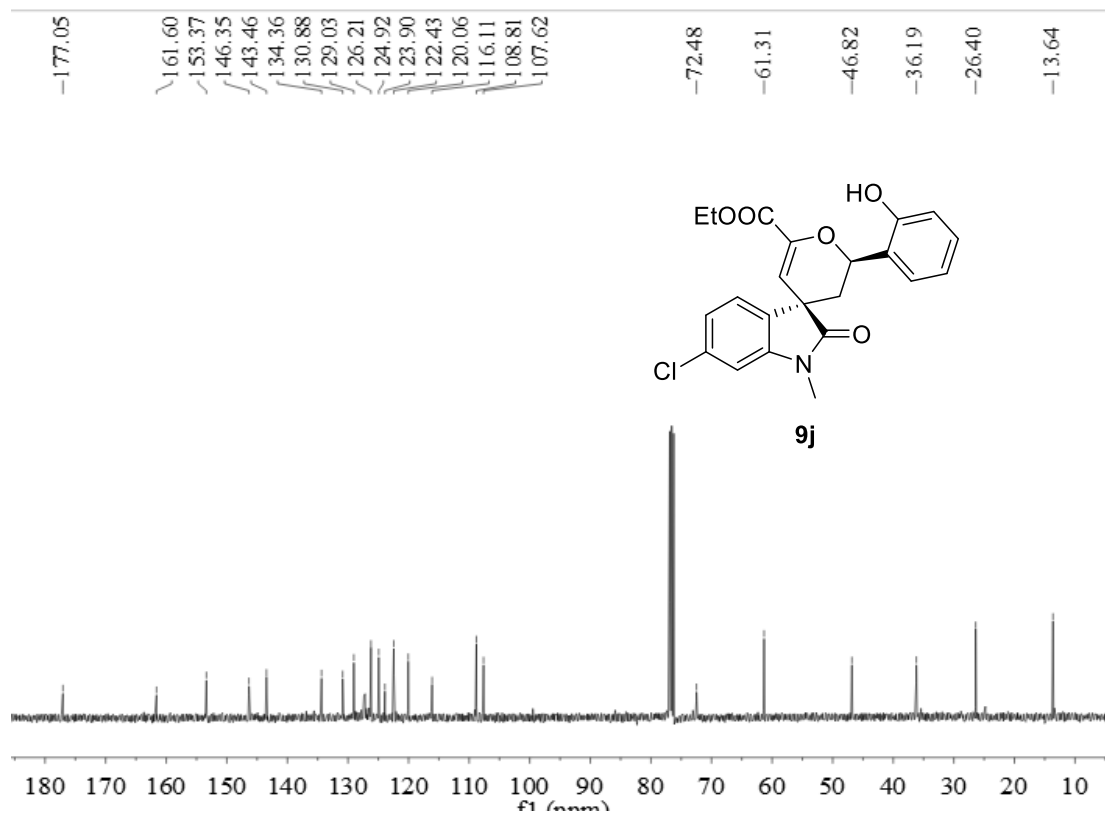

**Ethyl (2'*R*,3*R*)-2'-(2-hydroxyphenyl)-1,7-dimethyl-2-oxo-2',3'-dihydro spiro[indoline-3,4'-pyran]-6'-carboxylate **9k****

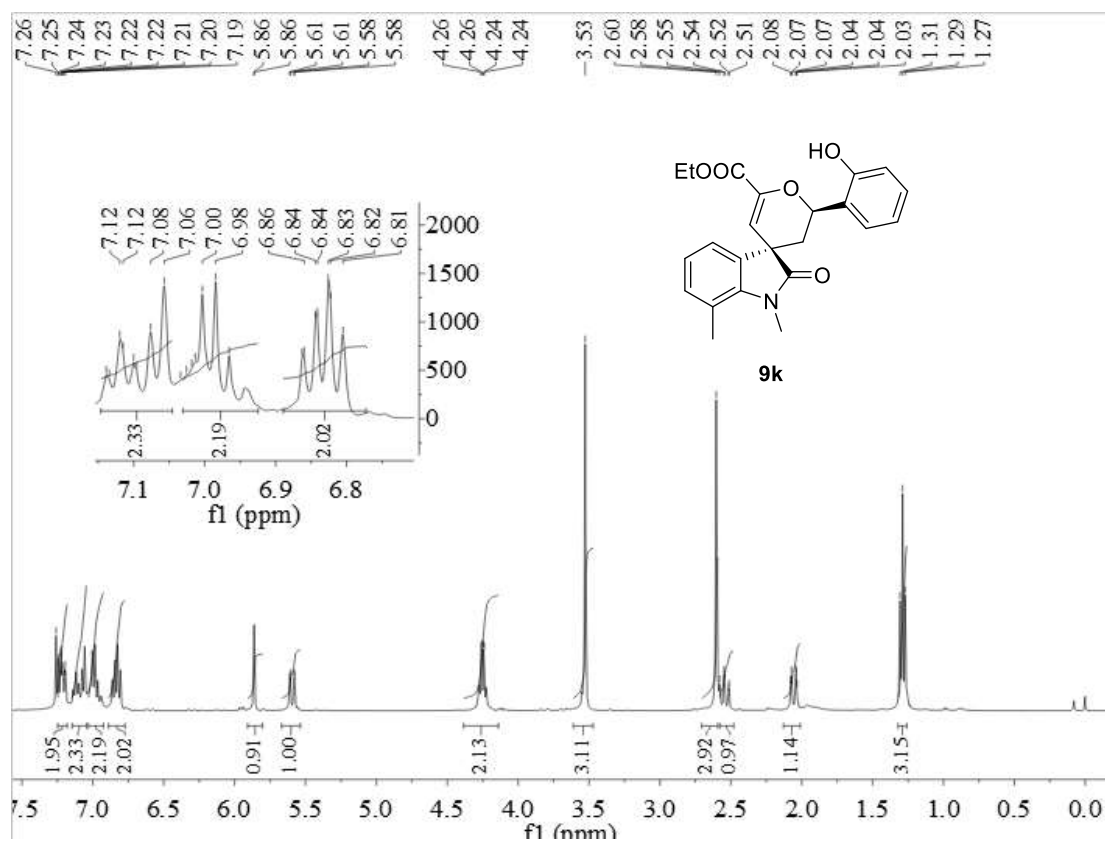

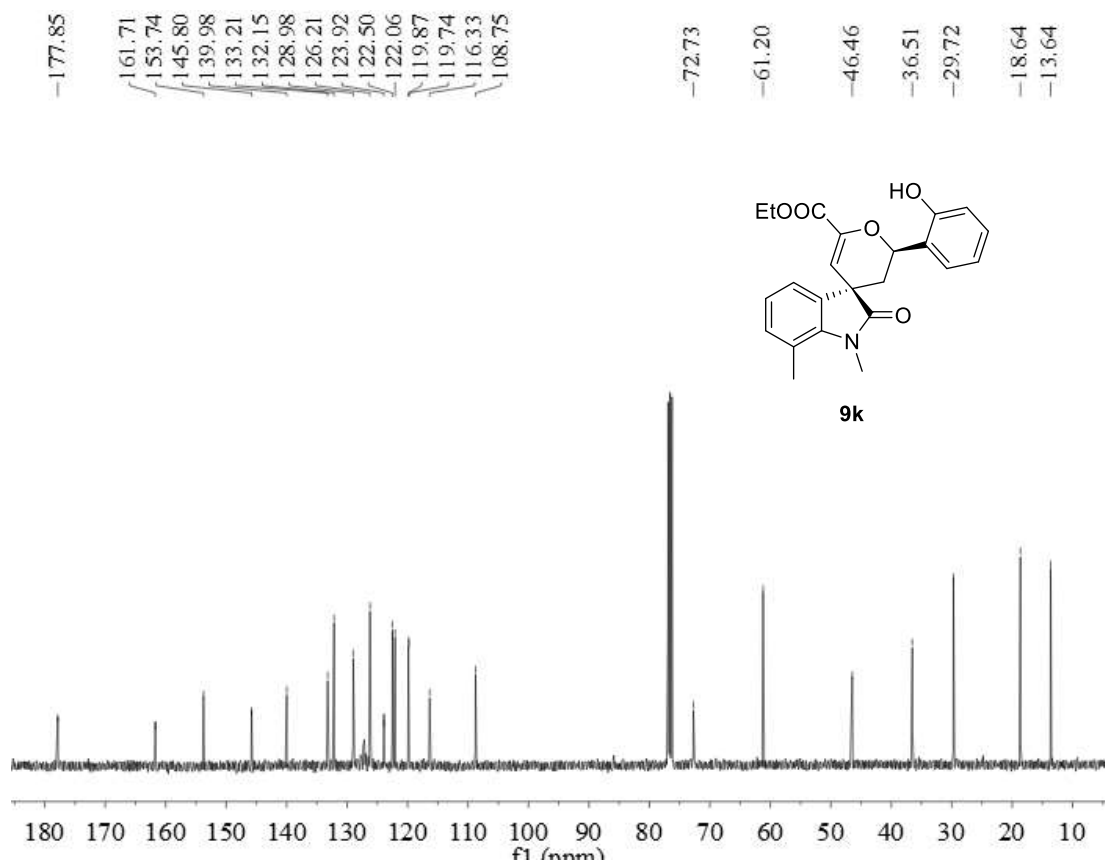

**Ethyl (2'*R*,3*R*)-7-fluoro-2'-(2-hydroxyphenyl)-1-methyl-2-oxo-2',3'-dihydro spiro[indoline-3,4'-pyran]-6'-carboxylate **9l****

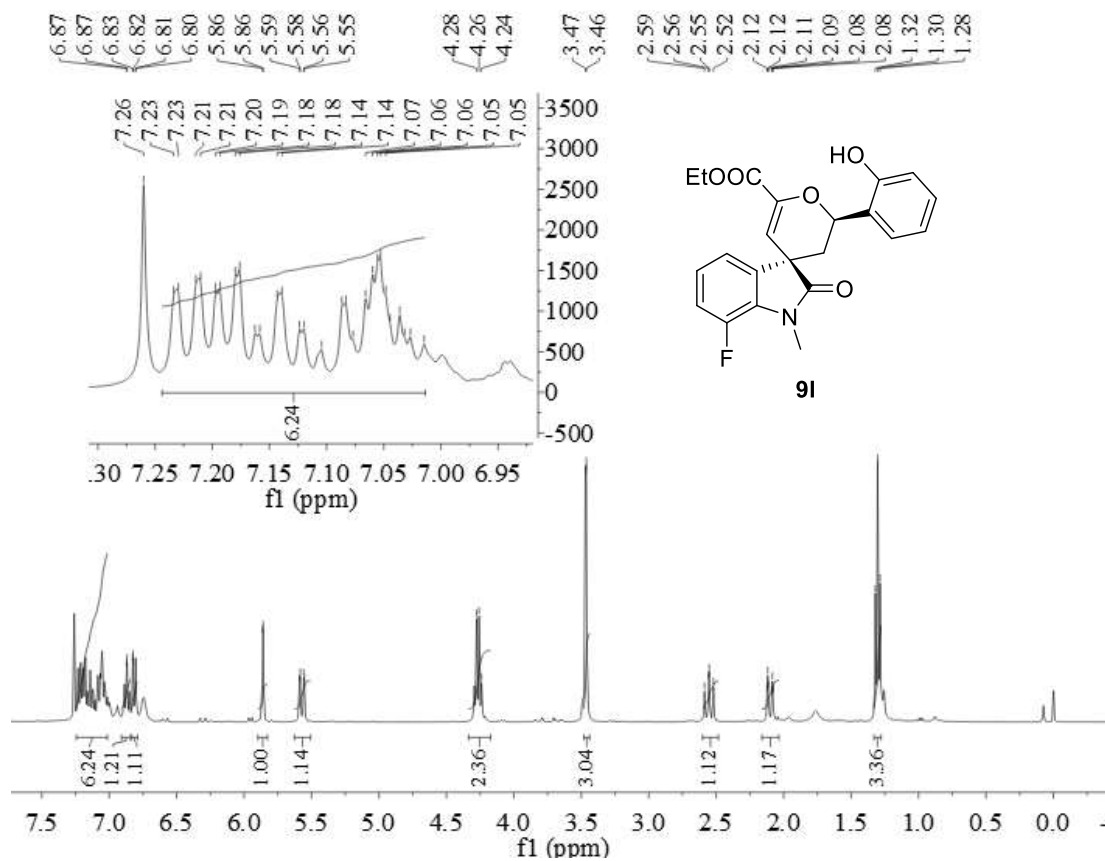



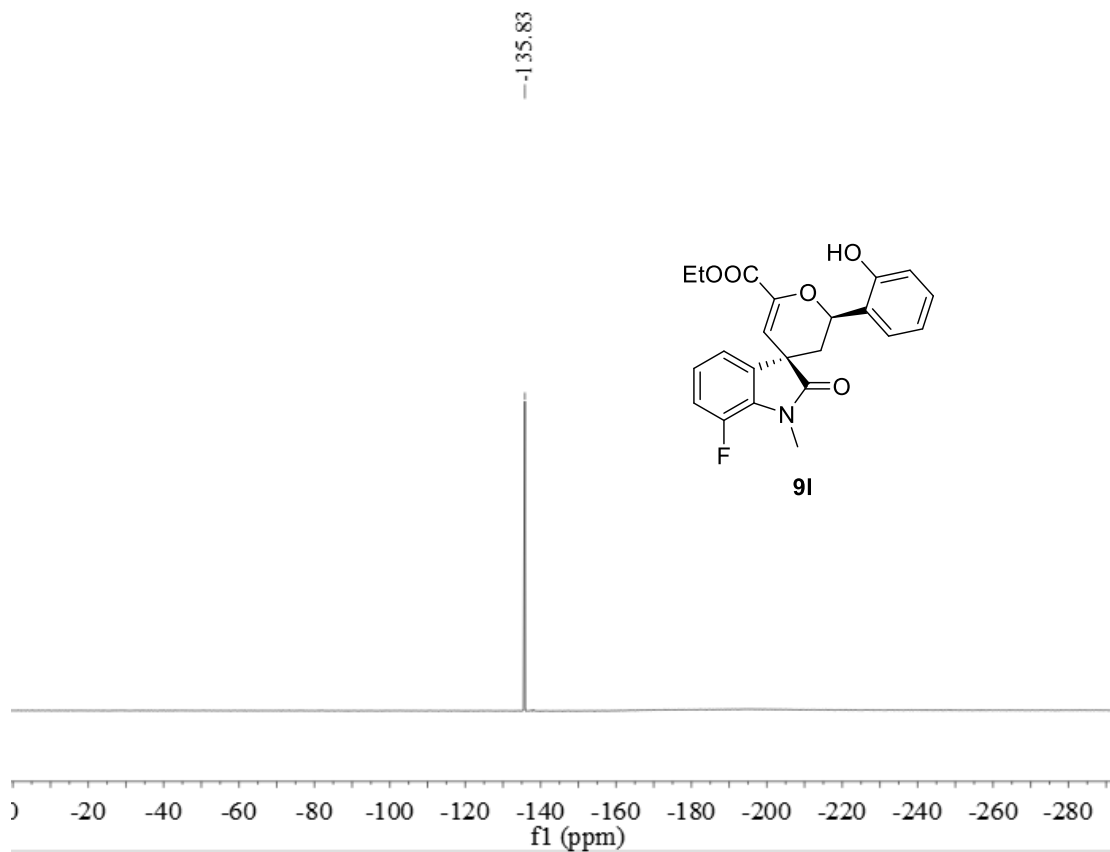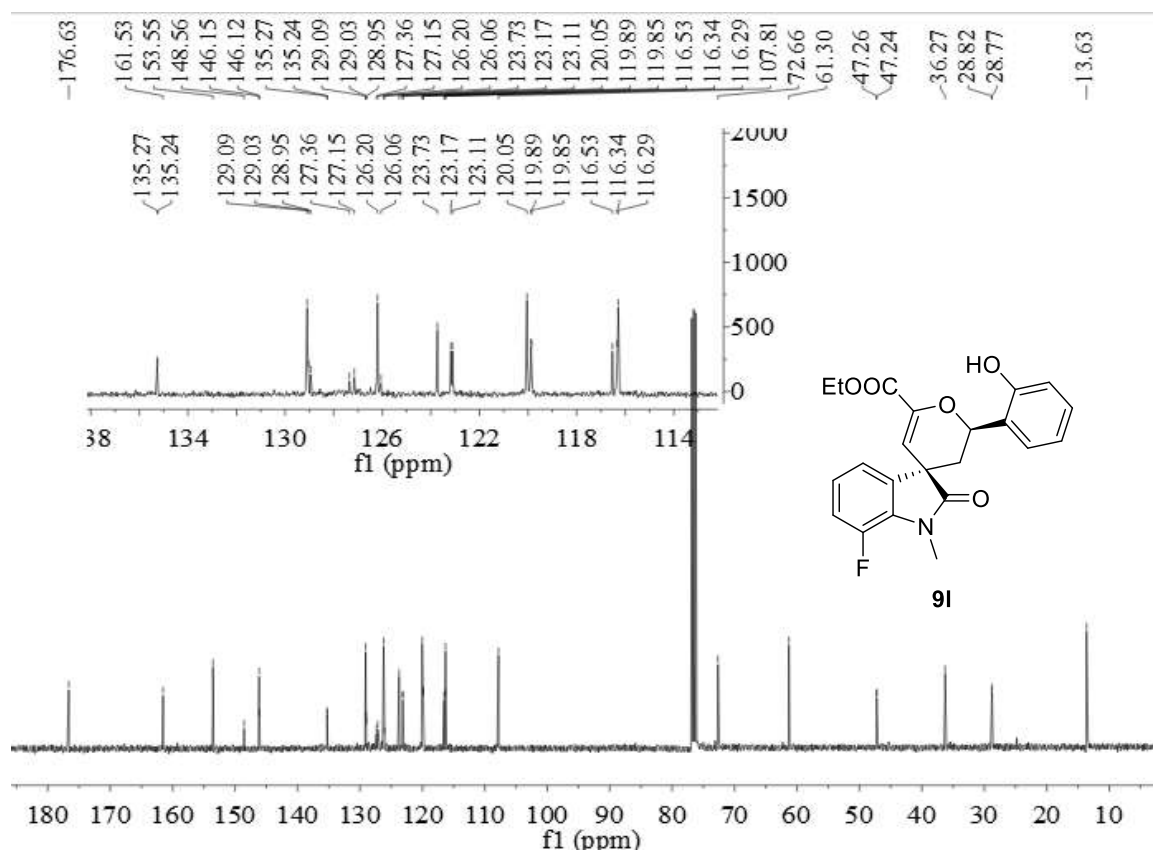

**Ethyl (2'*R*,3*R*)-2'-(2-hydroxy-5-methylphenyl)-1-methyl-2-oxo-2',3'-dihydro spiro[indoline-3,4'-pyran]-6'-carboxylate 9m**

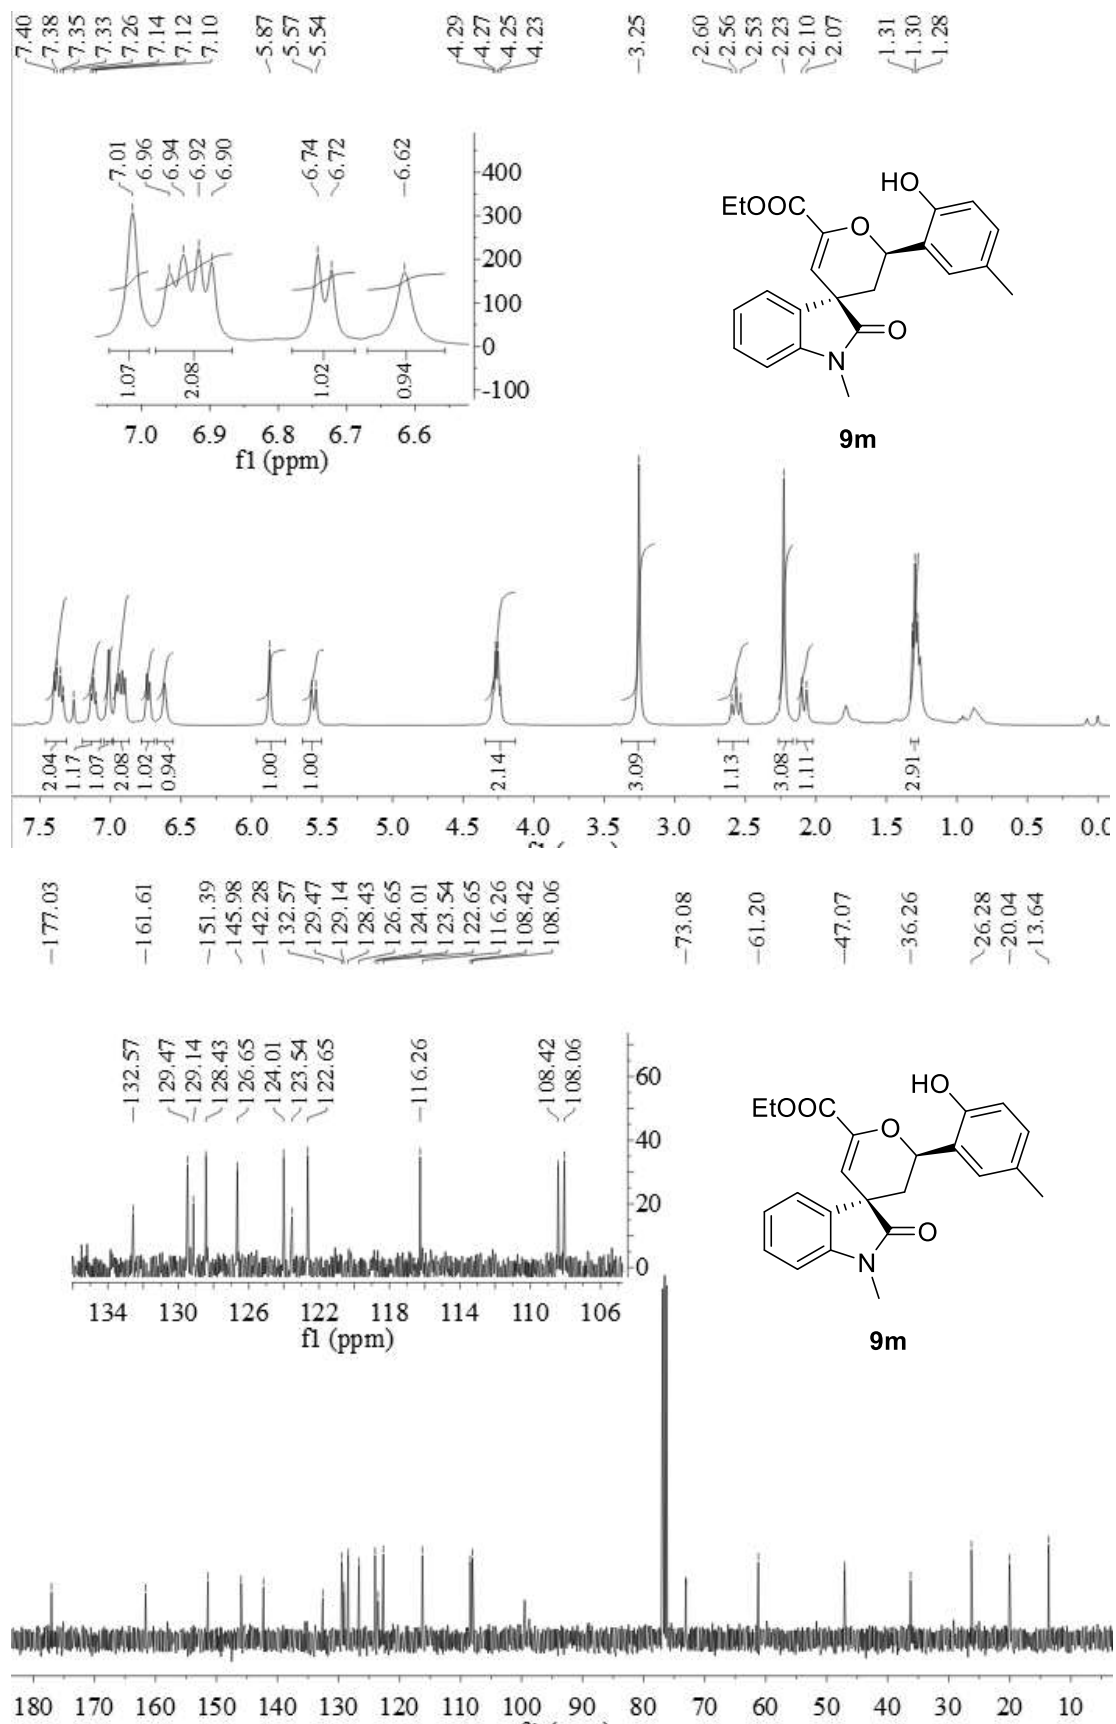

**Ethyl (2'*R*,3*R*)-2'-(5-(tert-butyl)-2-hydroxyphenyl)-1-methyl-2-oxo-2',3'-dihydro spiro[indoline-3,4'-pyran]-6'-carboxylate **9n****

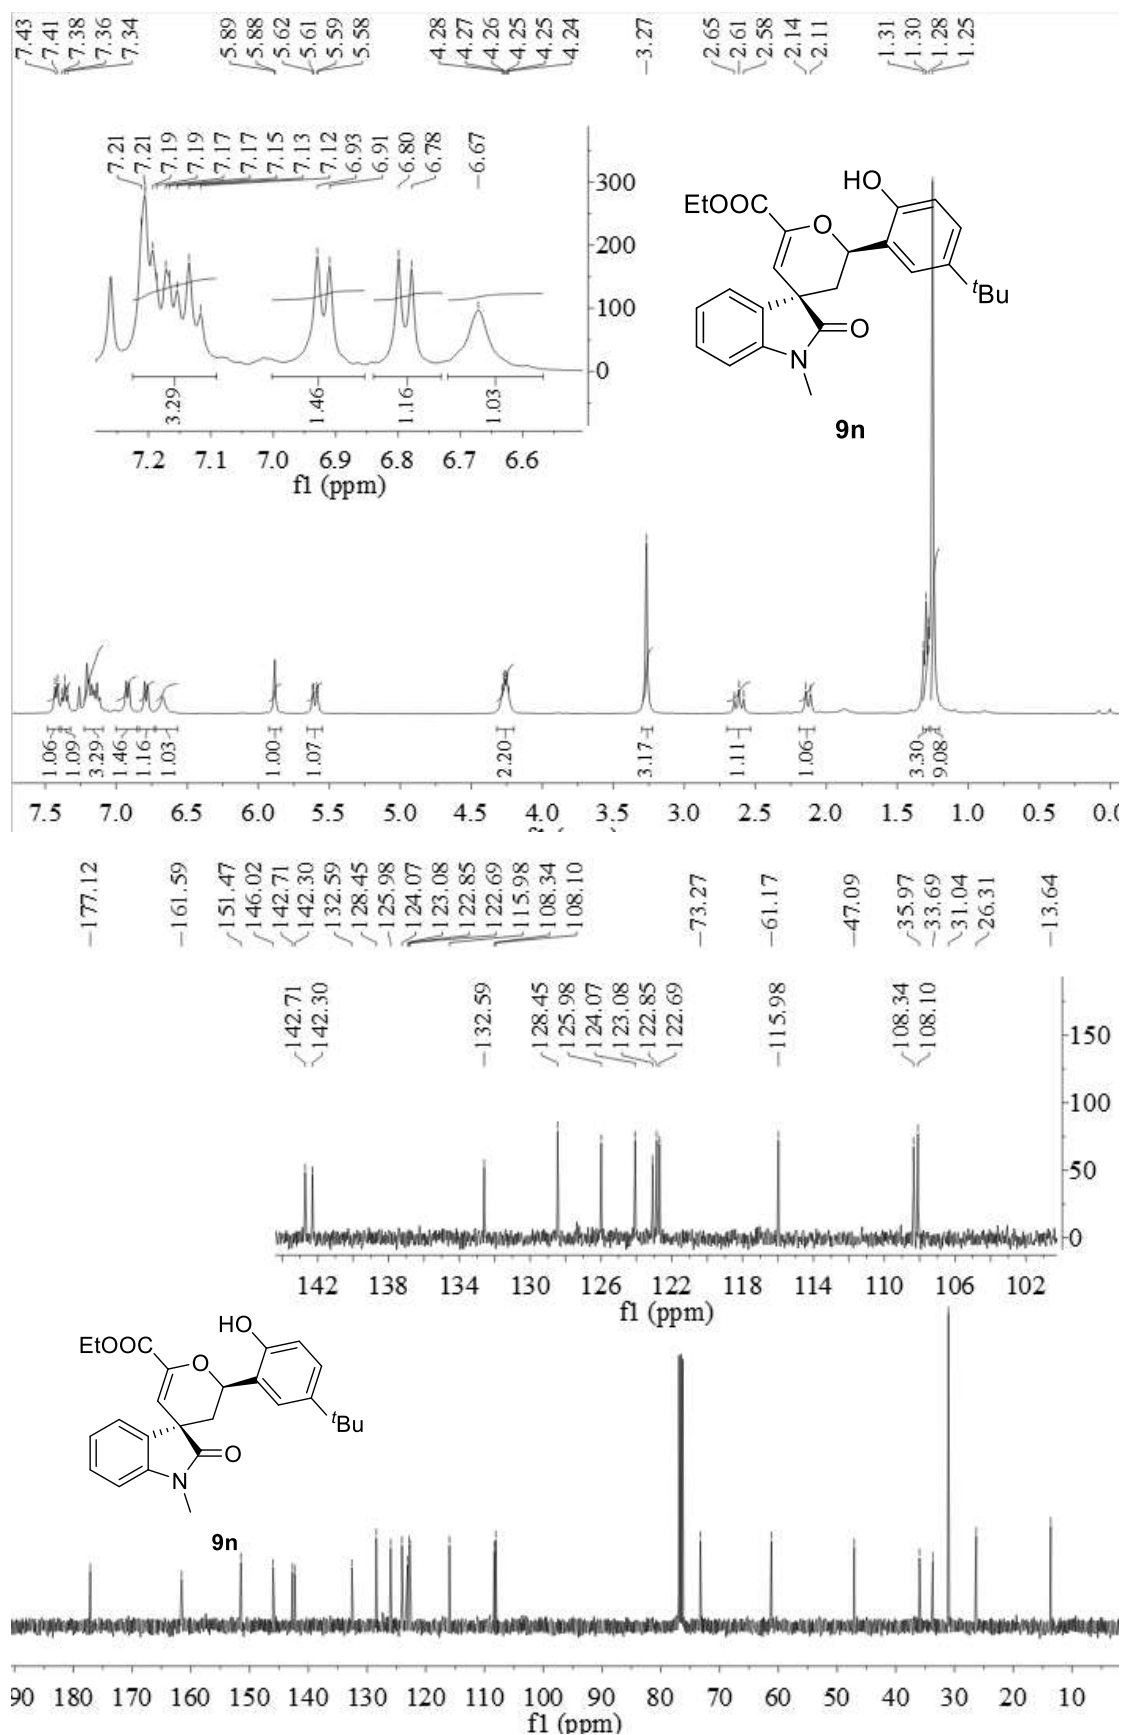

**Ethyl (2'*R*,3*R*)-2'-(5-chloro-2-hydroxyphenyl)-1-methyl-2-oxo-2',3'-dihydro spiro[indoline-3,4'-pyran]-6'-carboxylate **9o****

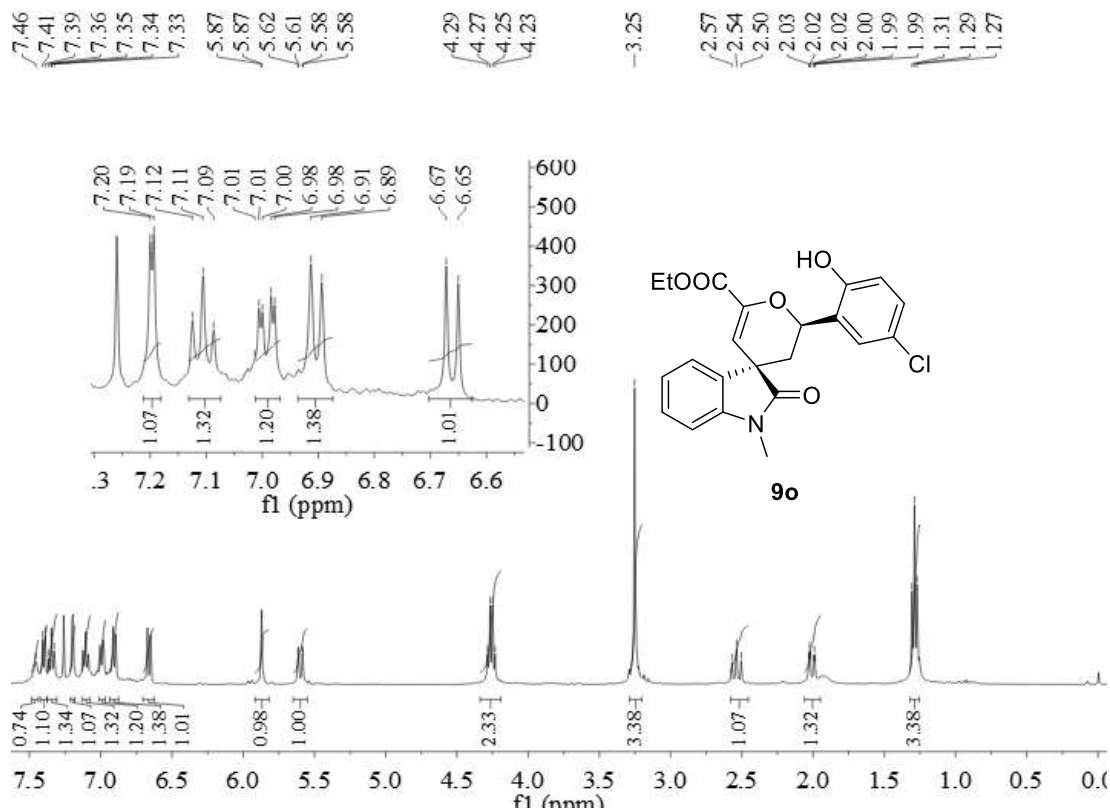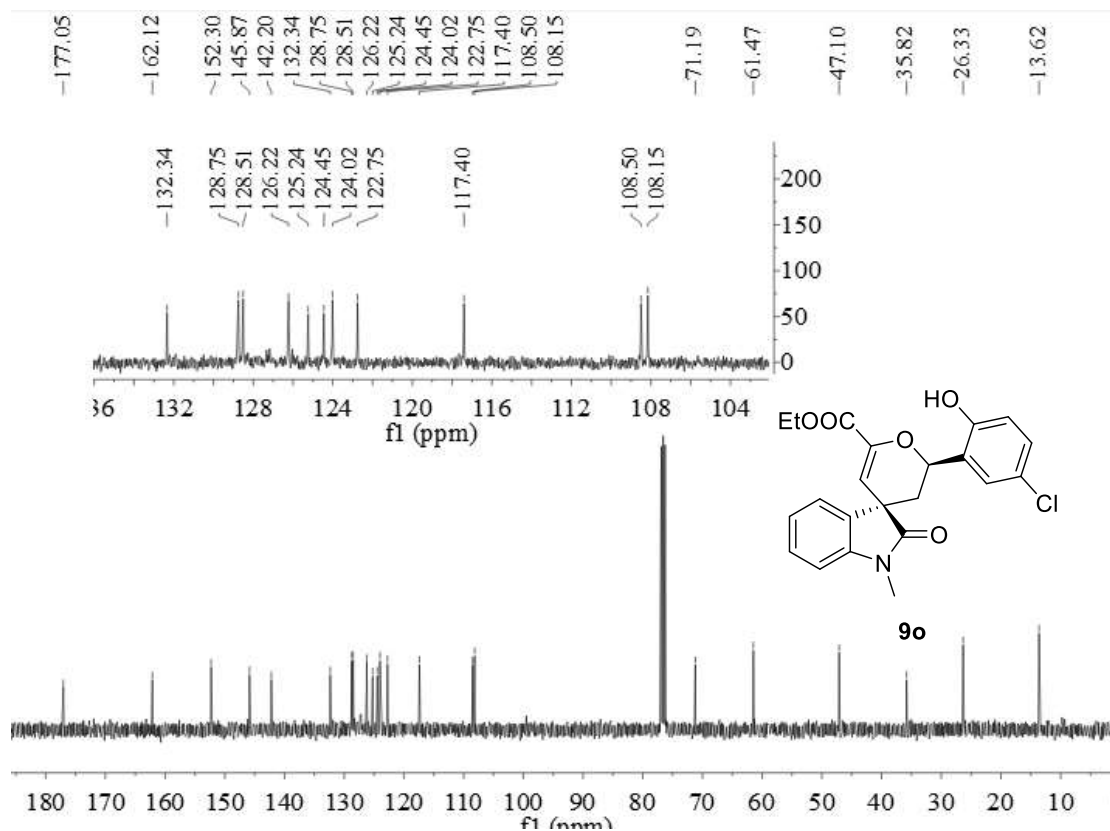

**Ethyl (2'*R*,3*R*)-2'-(2-hydroxy-4-methylphenyl)-1-methyl-2-oxo-2',3'-dihydro spiro[indoline-3,4'-pyran]-6'-carboxylate 9p**

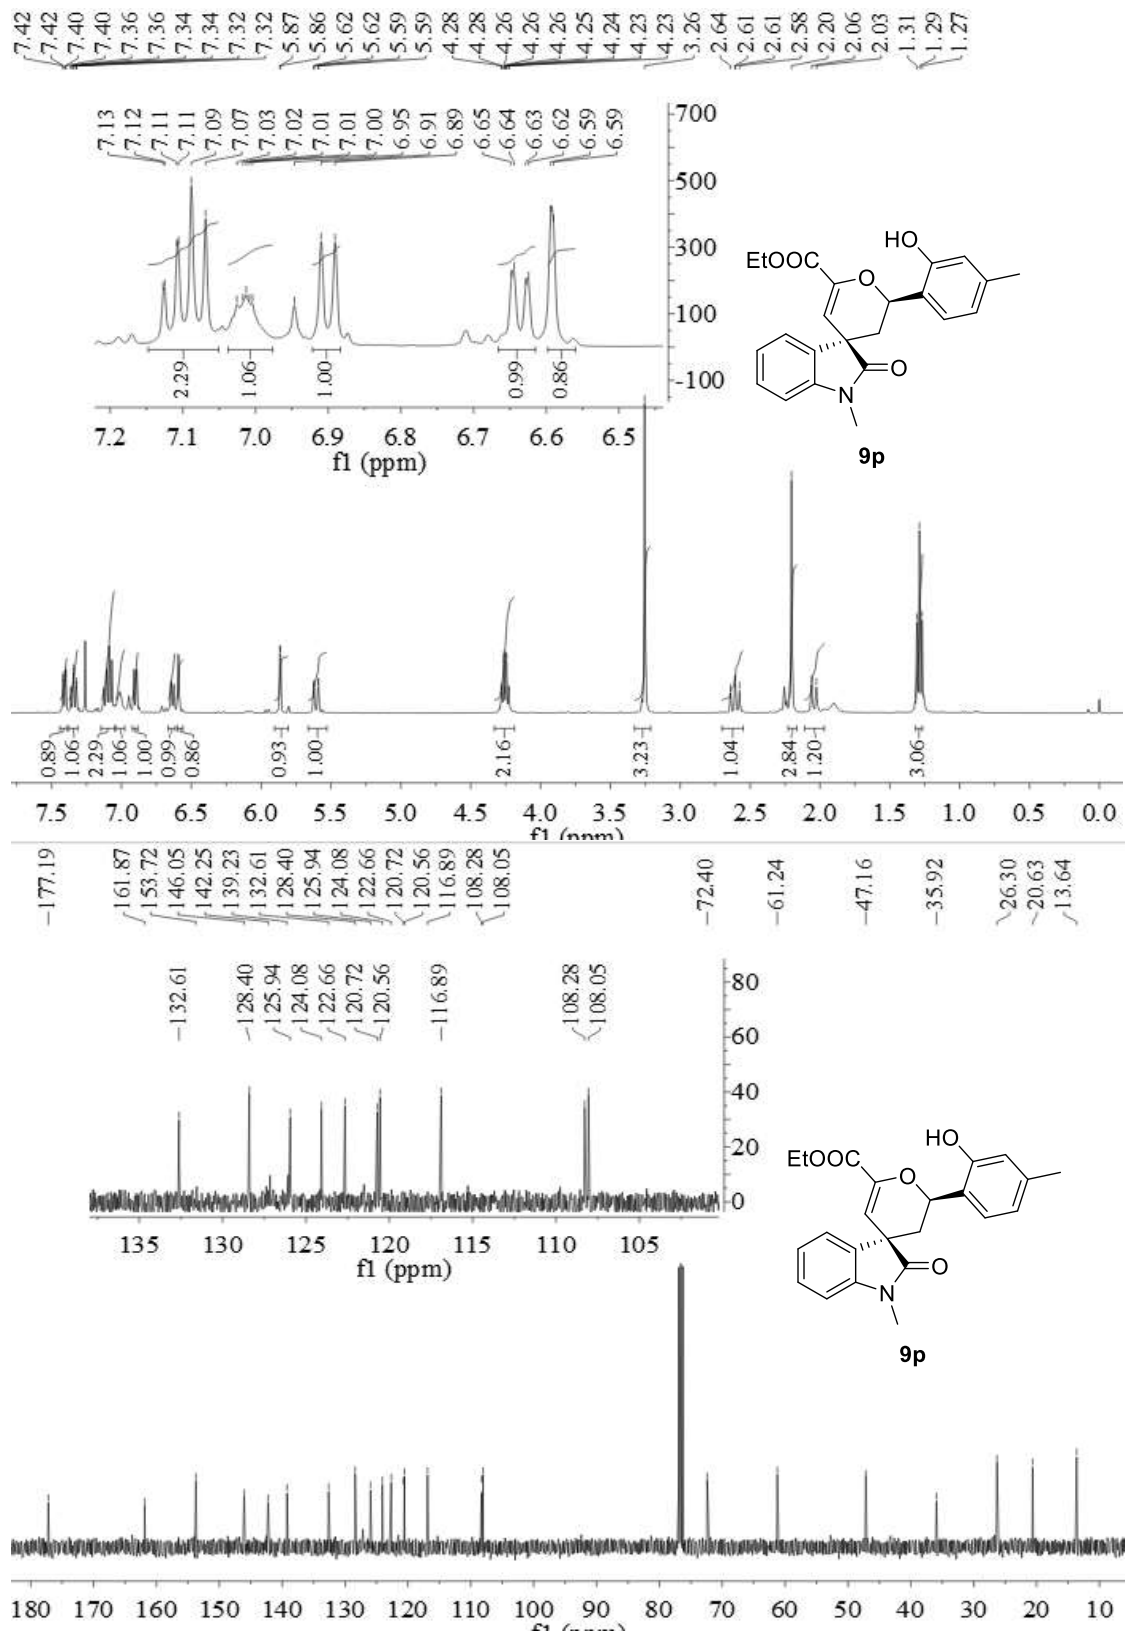

**Ethyl (2'R,3R)-2'-(2-hydroxy-4-methoxyphenyl)-1-methyl-2-oxo-2',3'-dihydro  
spiro[indoline-3,4'-pyran]-6'-carboxylate 9q**

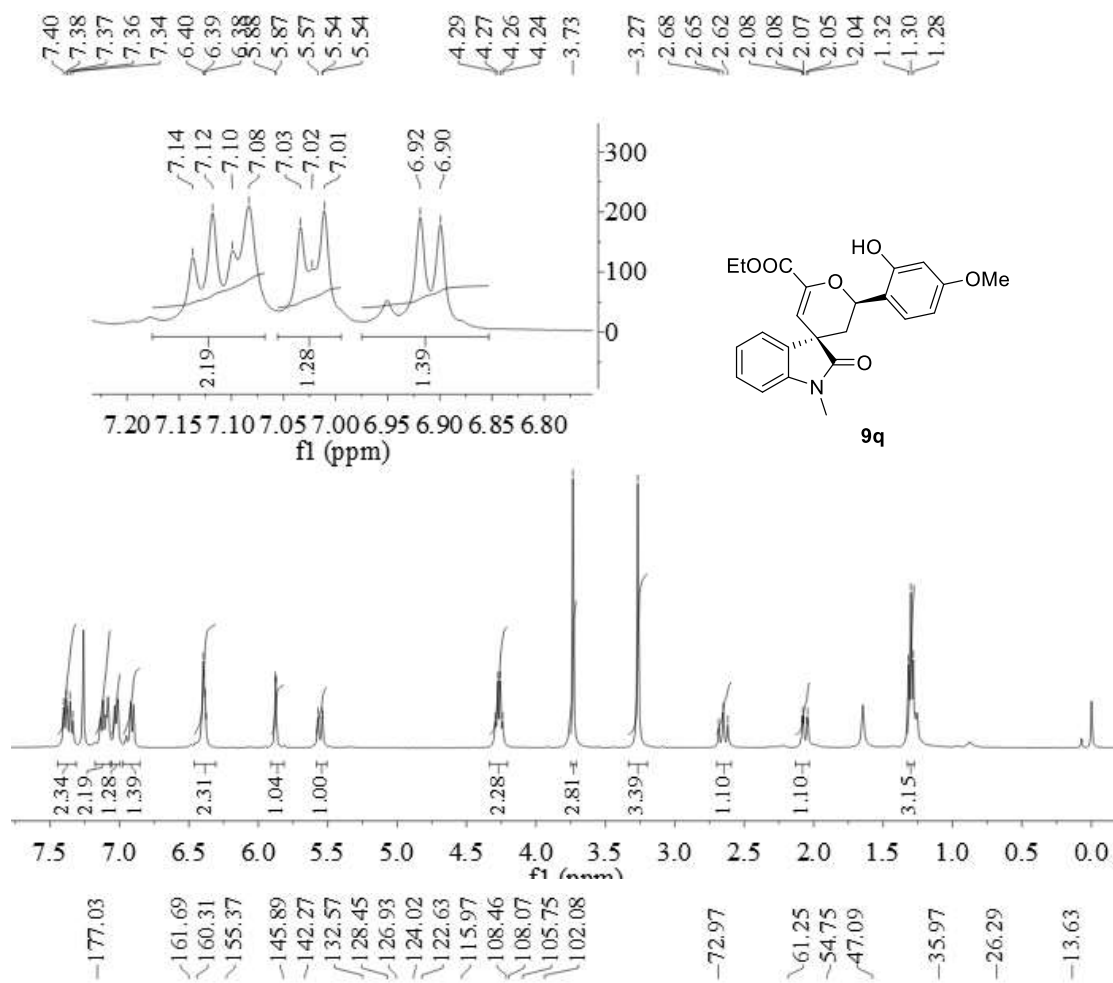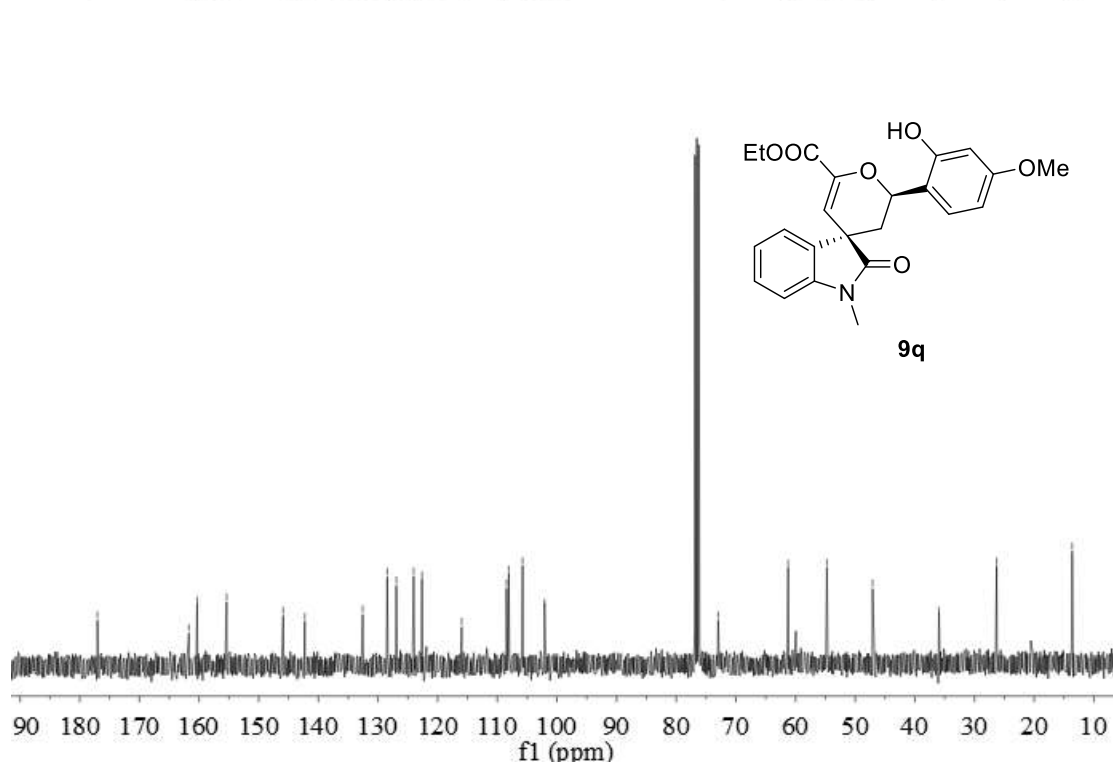

**Ethyl (2'*R*,3*R*)-2'-(2-hydroxy-3-methoxyphenyl)-1-methyl-2-oxo-2',3'-dihydro spiro[indoline-3,4'-pyran]-6'-carboxylate **9r****

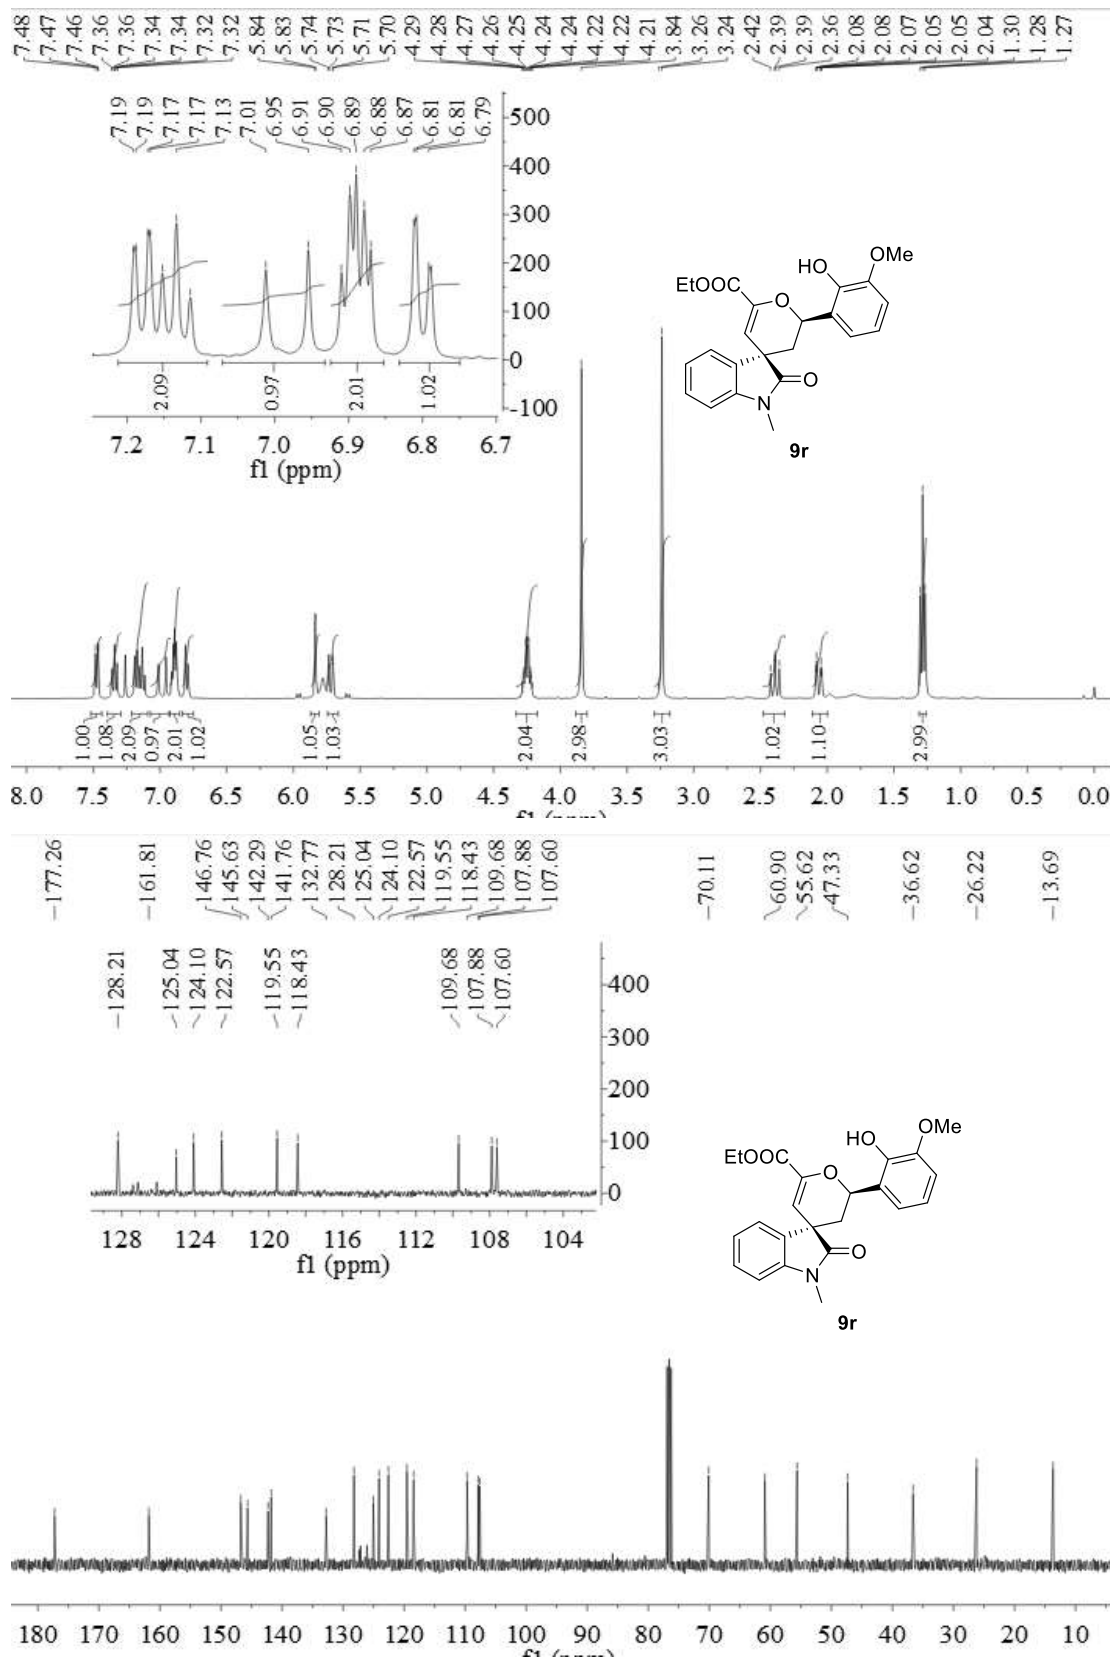

**Ethyl (2'*R*,3*R*)-2'-(2-hydroxy-3-methylphenyl)-1-methyl-2-oxo-2',3'-dihydro spiro[indoline-3,4'-pyran]-6'-carboxylate 9s**

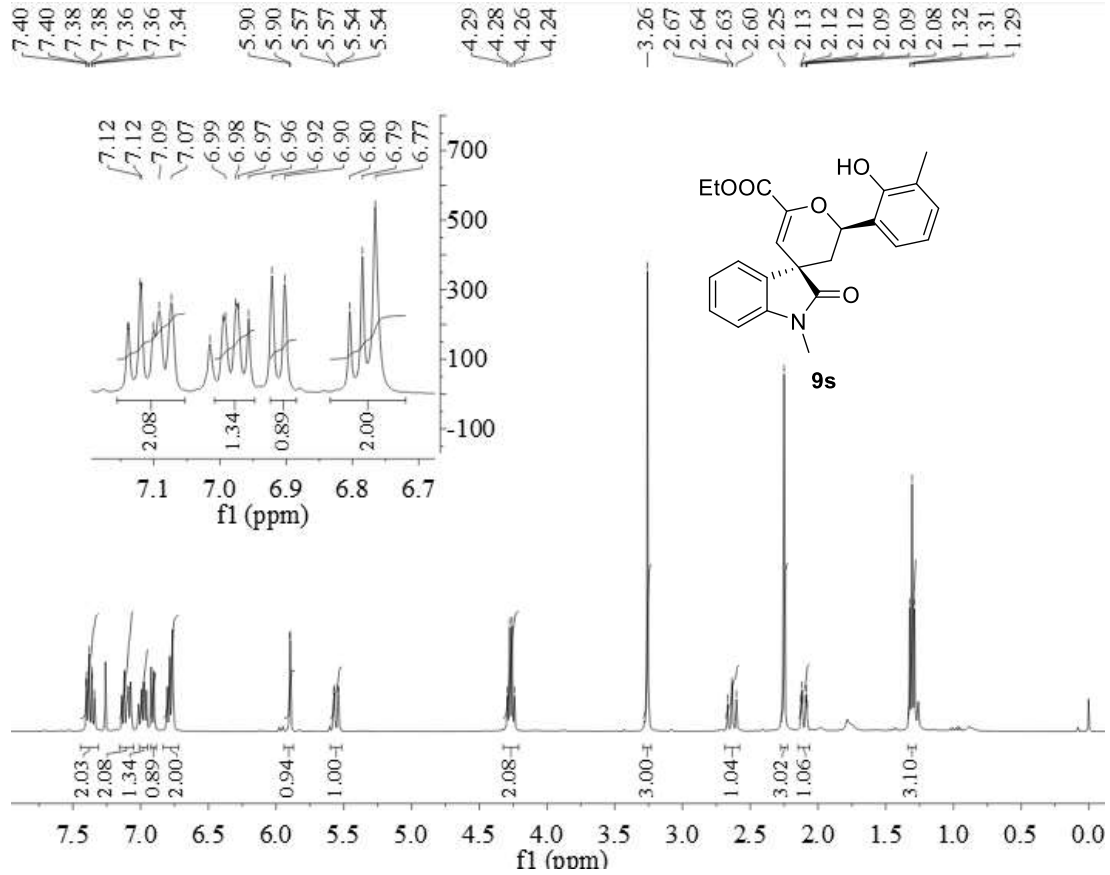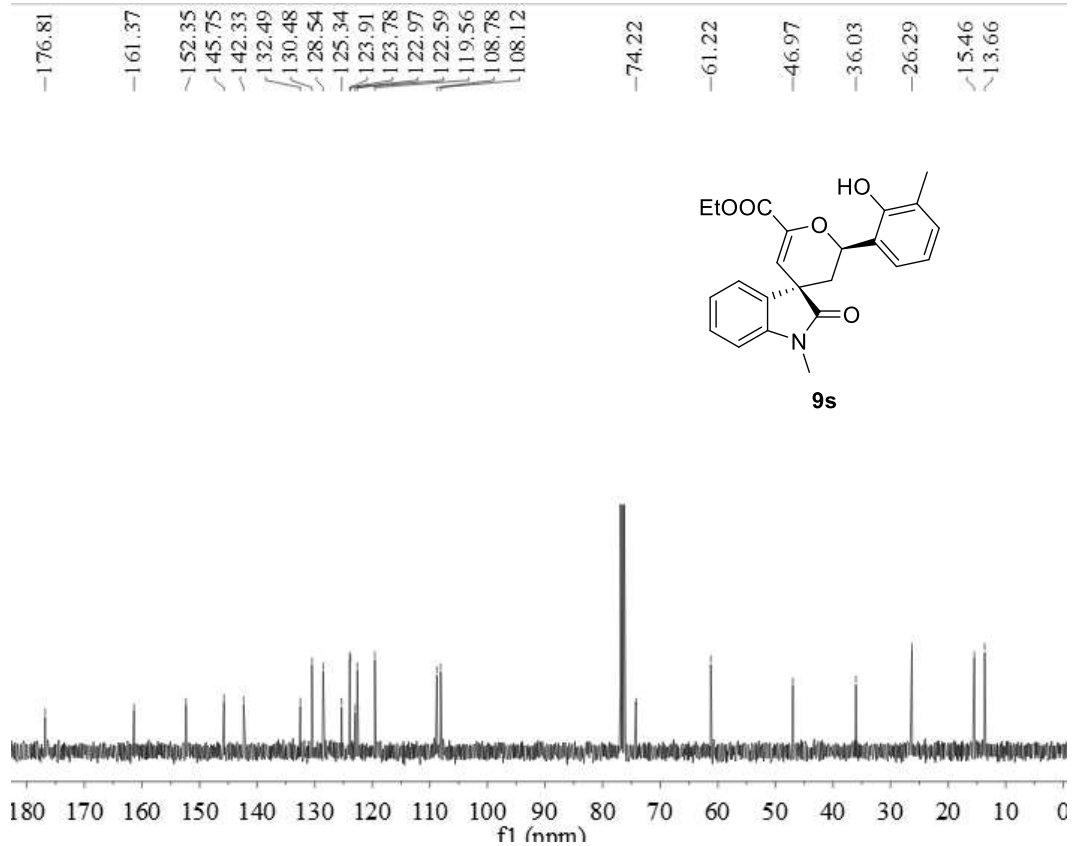



**Ethyl (2'*R*,3*R*)-2'-(2-hydroxyphenyl)-1,3'-dimethyl-2-oxo-2',3'-dihydro spiro[indoline-3,4'-pyran]-6'-carboxylate 9t**

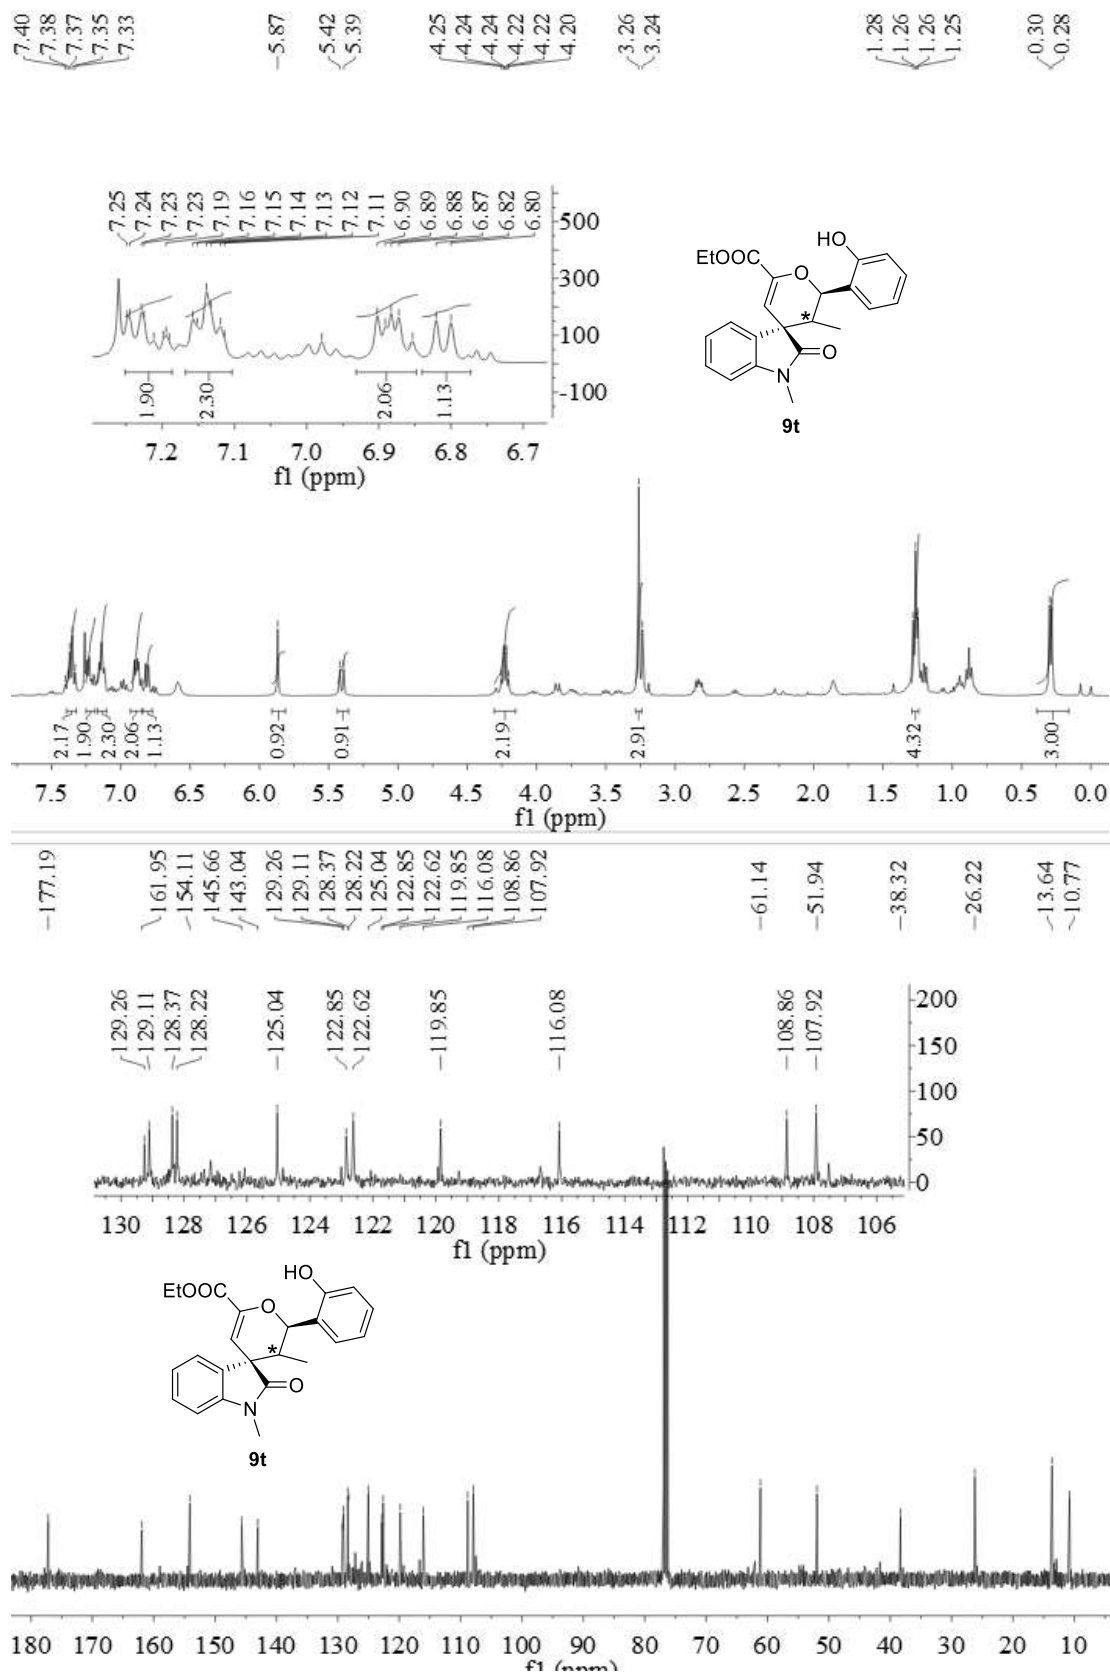

**Ethyl-(*S,E*)-3-(3-(2-(2-hydroxyphenyl)-2-phenylvinyl)-1-methyl-2-oxindolin-3-yl)-2-oxopropanoate 9v**

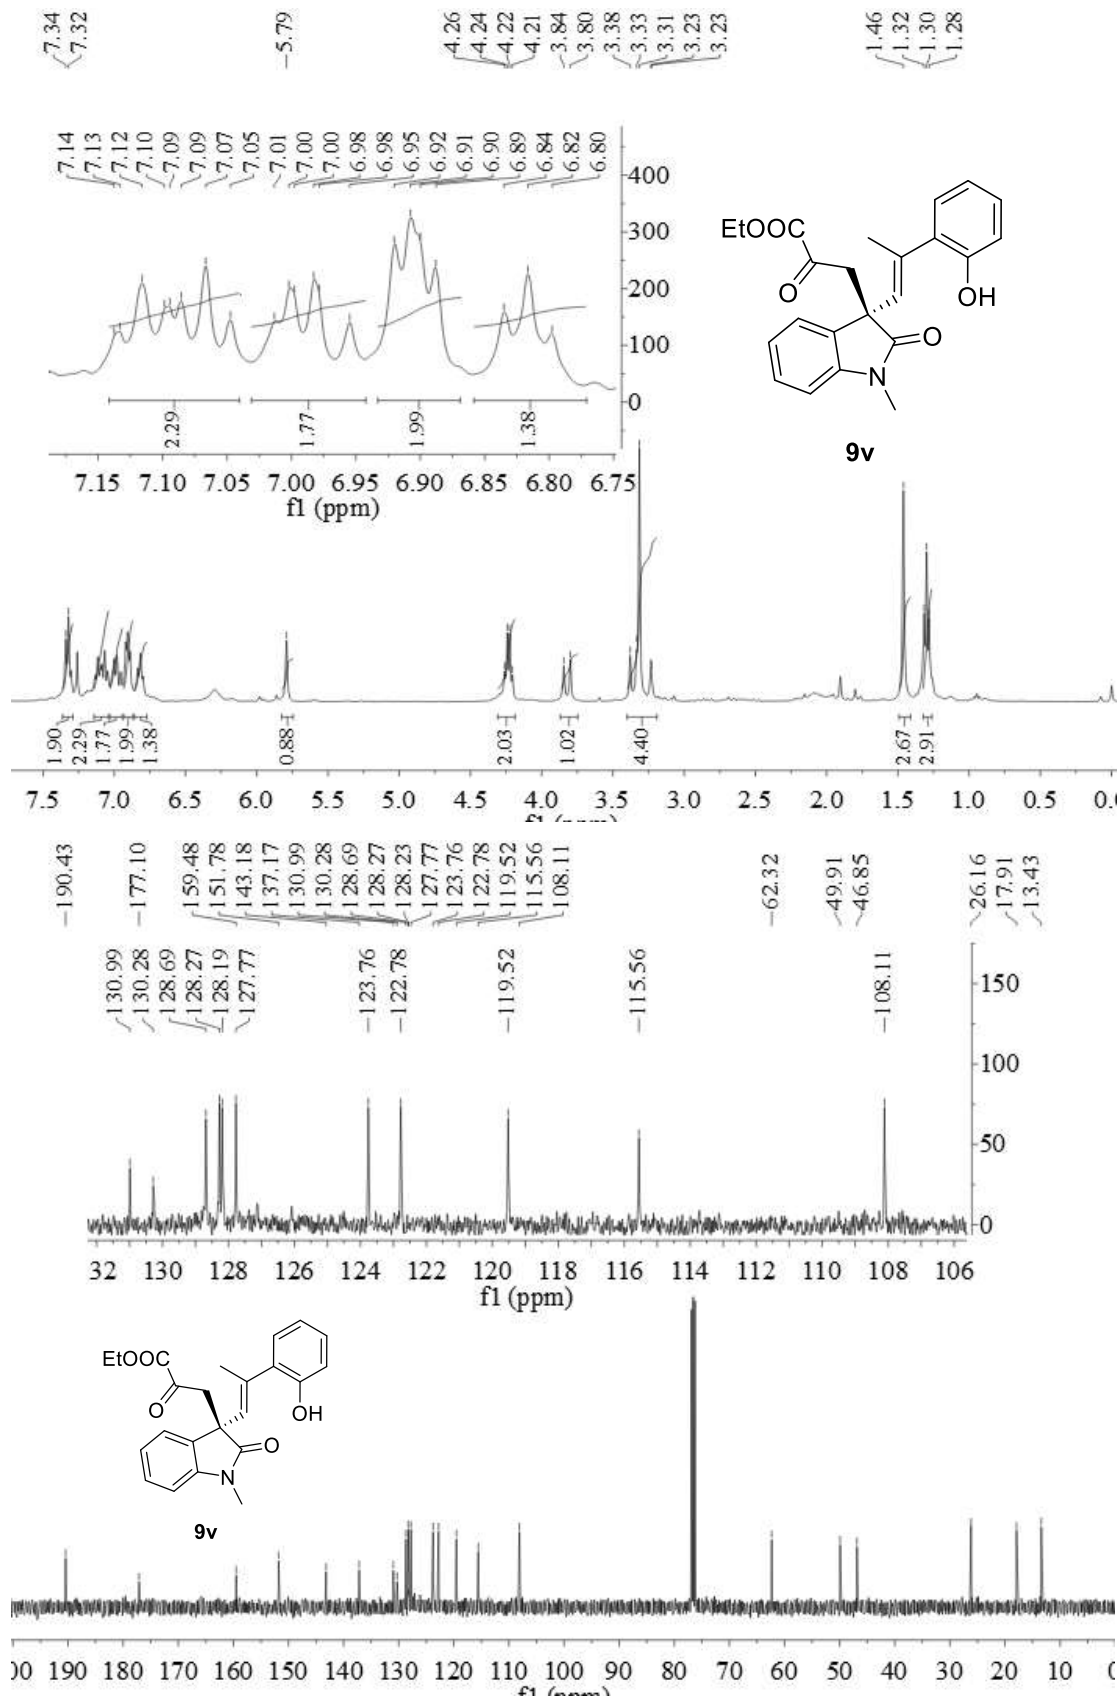

**Ethyl-(*S,E*)-3-(3-(2-(2-hydroxyphenyl)-2-phenylvinyl)-1-methyl-2-oxoindolin-3-yl)-2-oxopropanoate 9w**

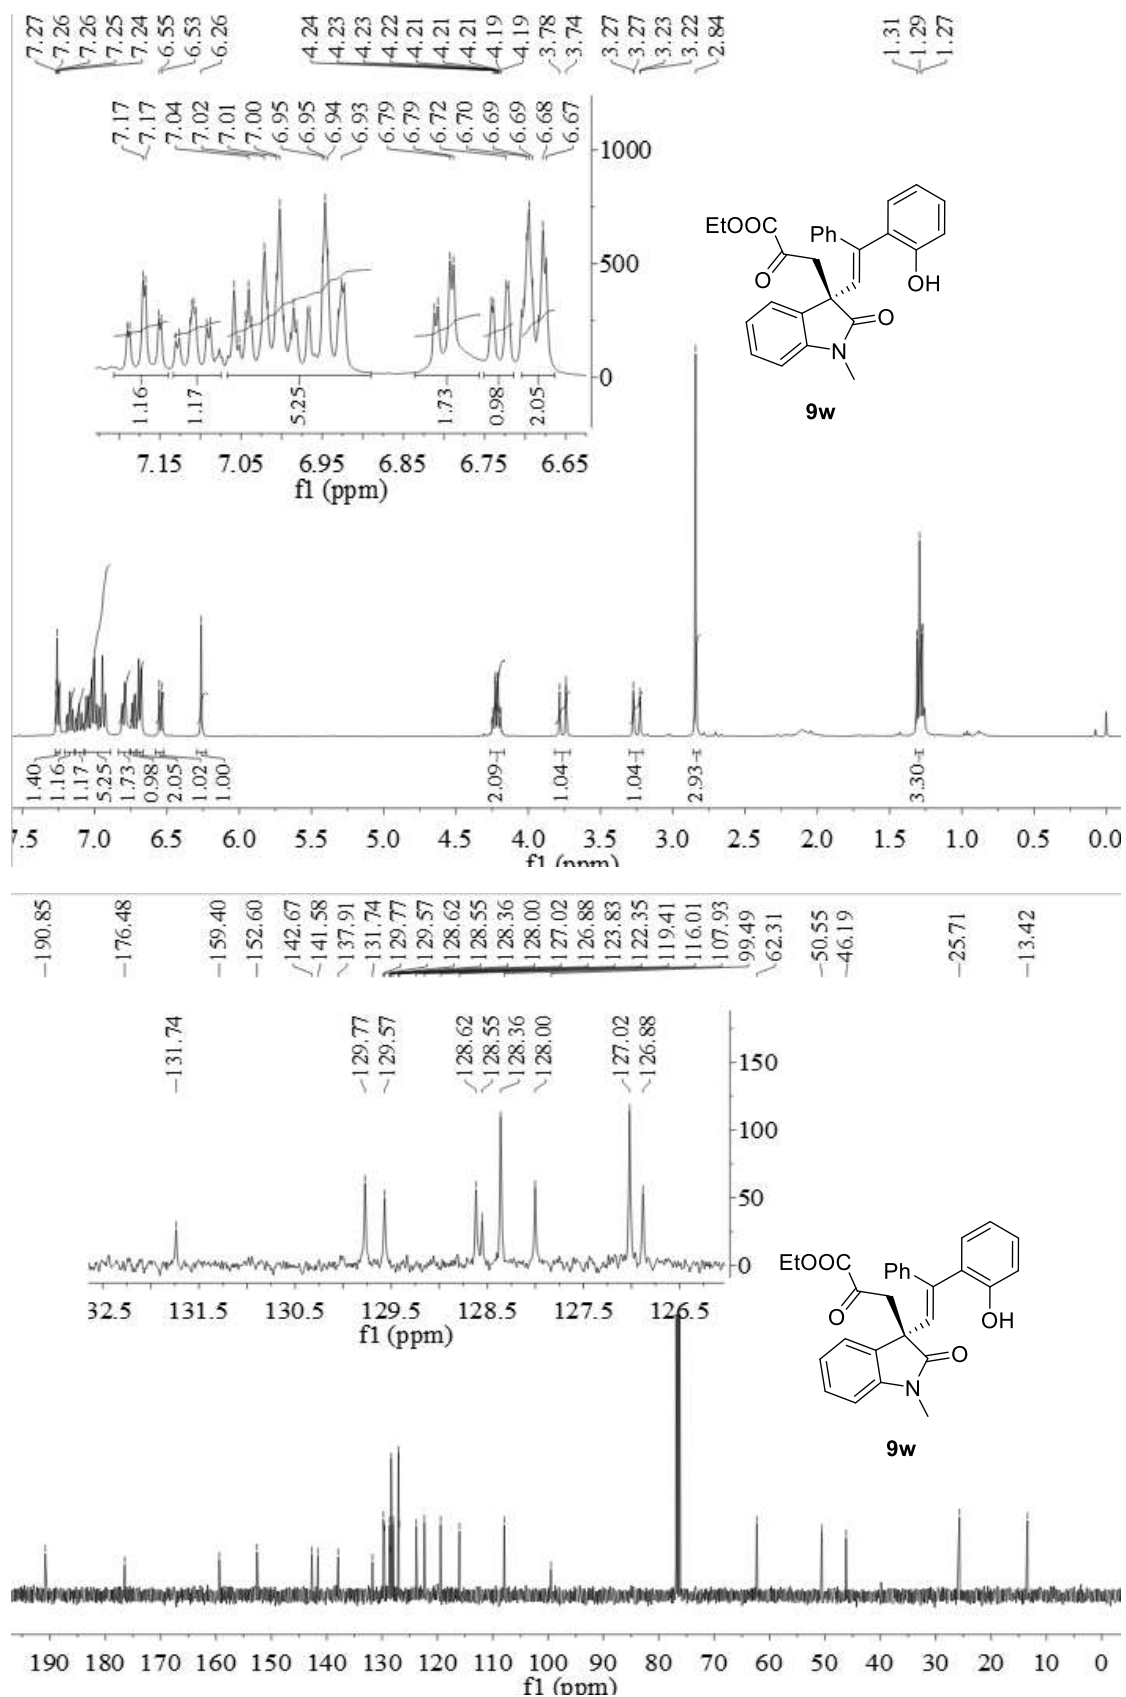

**(2*R*,3*R*)-2'-(2-Hydroxyphenyl)-*N*,1-dimethyl-2-oxo-2',3'-dihydrospiro[indoline-3,4'-pyran]-6'-carboxamide 12a**

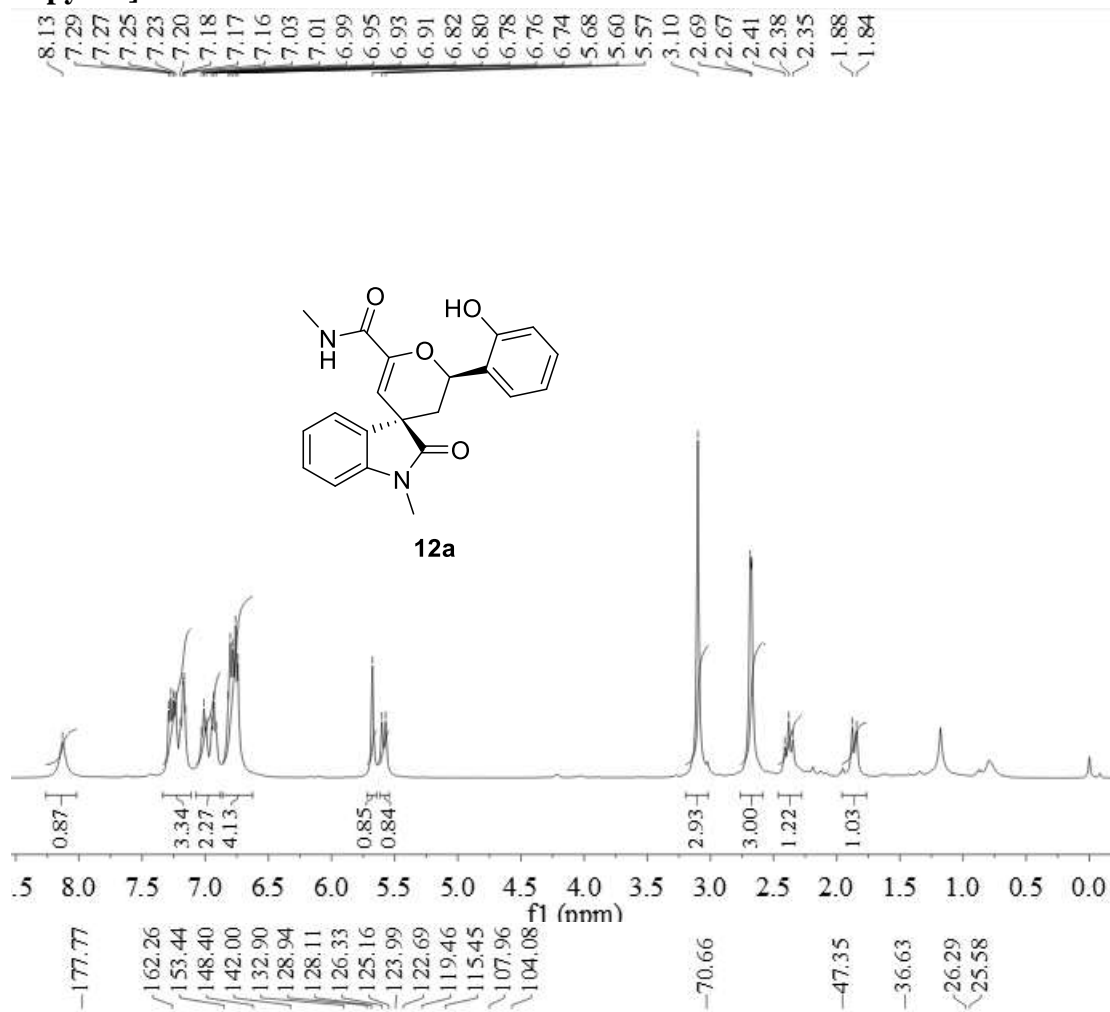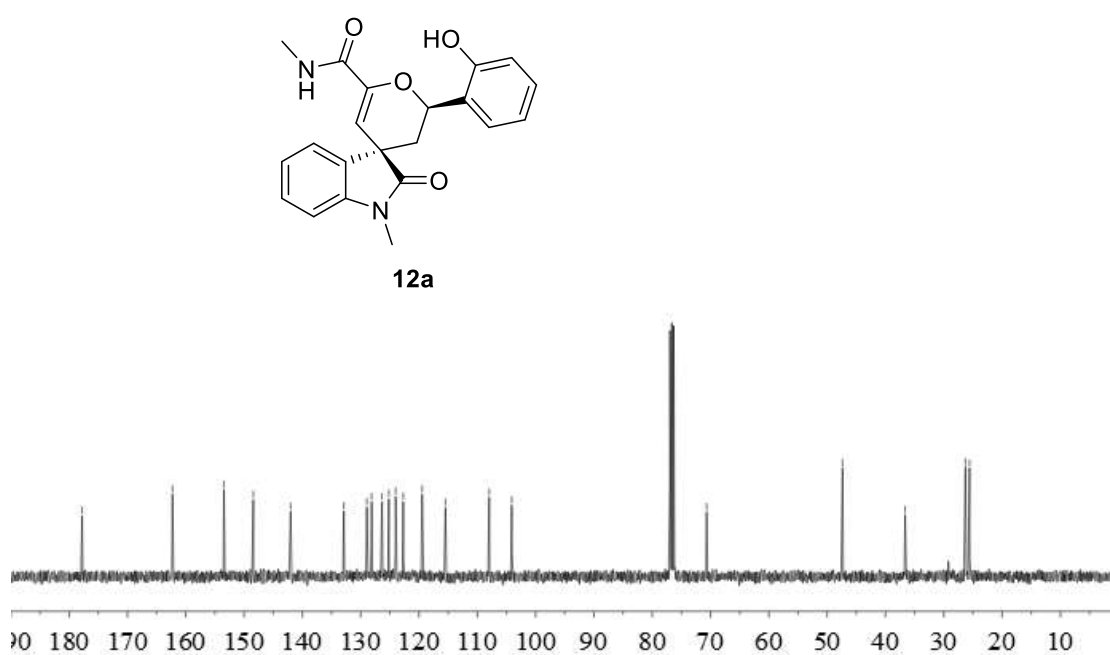

**(2'*R*,3*R*)-5-Bromo-2'-(2-hydroxyphenyl)-*N*,1-dimethyl-2-oxo-2',3'-dihydrospiro [indoline-3,4'-pyran]-6'-carboxamide 12b**

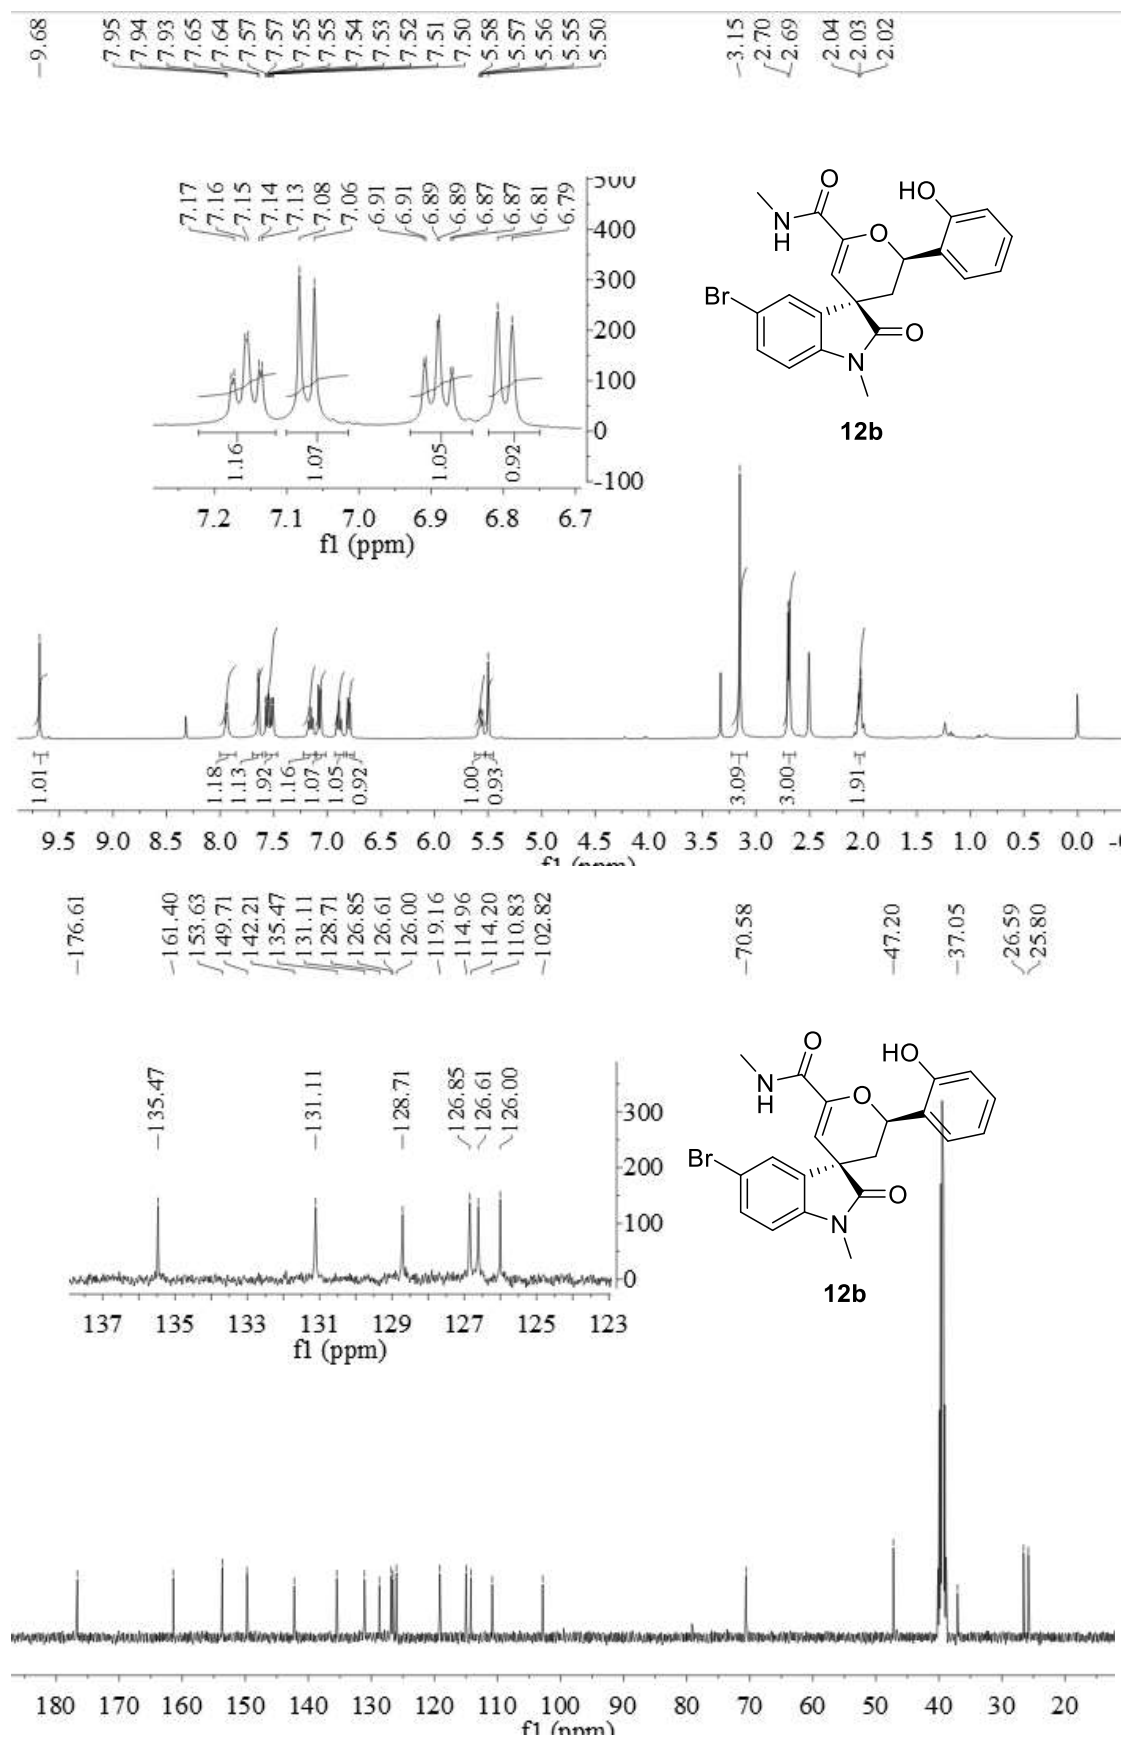

**(*S,E*)-3-(3-(2-Hydroxystyryl)-1-methyl-2-oxindolin-3-yl)-*N*-methyl-2-oxopropanamide 13**

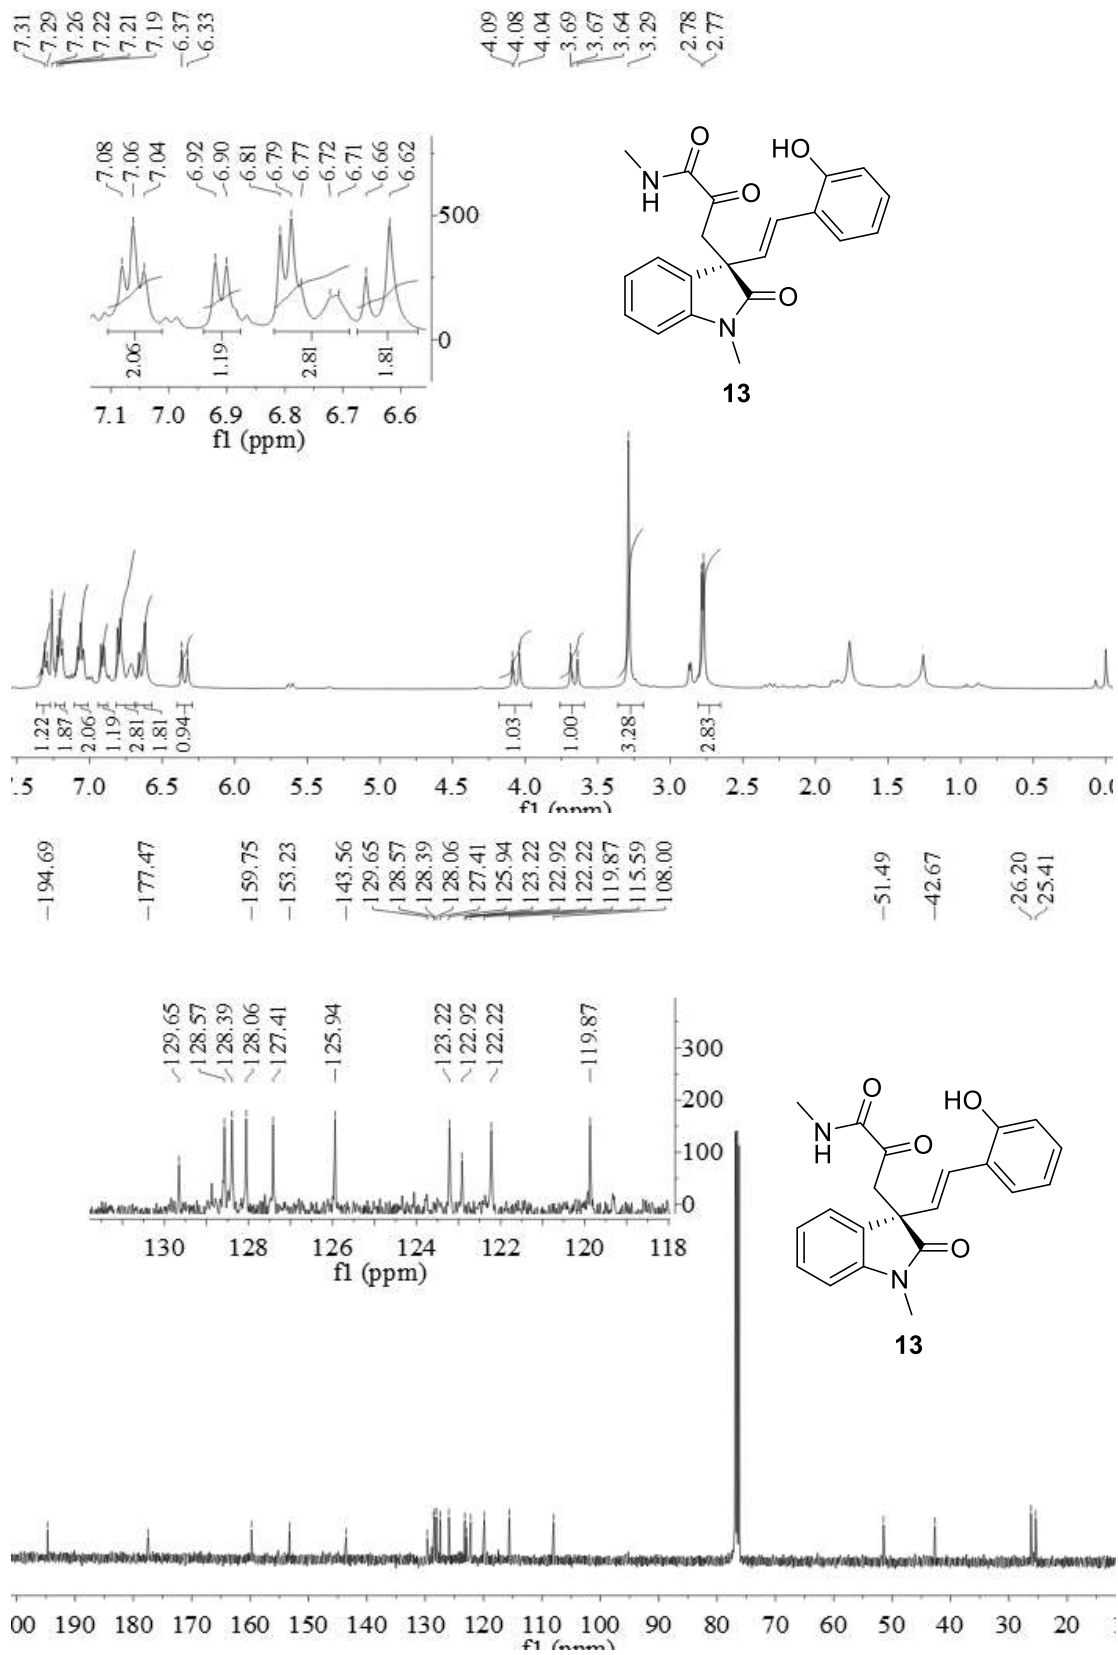

## 5. HPLC spectra

### Ethyl-(3*S*,4*a*'*S*,8*a*'*S*)-1-methyl-2-oxo-4*a*',6',7',8*a*'-tetrahydro-5'*H*-spiro[indoline-3,4'-pyrano[2,3-*b*]pyran]-2'-carboxylate **4a**

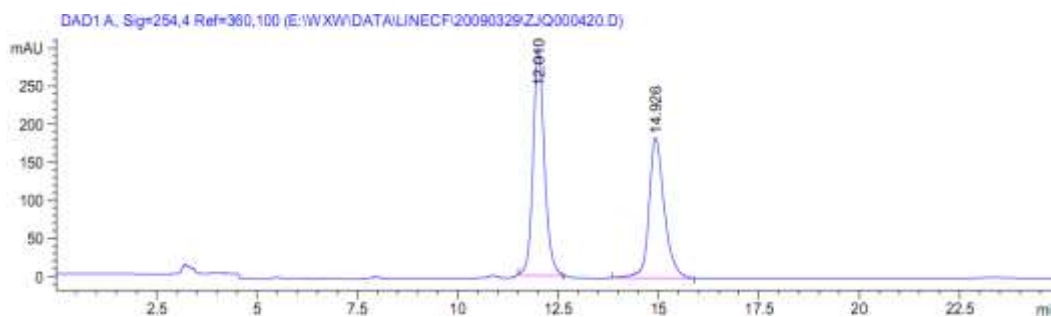

| Peak # | RetTime [min] | Type | Width [min] | Area [mAU*s] | Height [mAU] | Area %  |
|--------|---------------|------|-------------|--------------|--------------|---------|
| 1      | 12.010        | MM R | 0.3275      | 5837.26318   | 297.04694    | 54.2712 |
| 2      | 14.926        | BB   | 0.3989      | 4918.47314   | 184.56526    | 45.7288 |

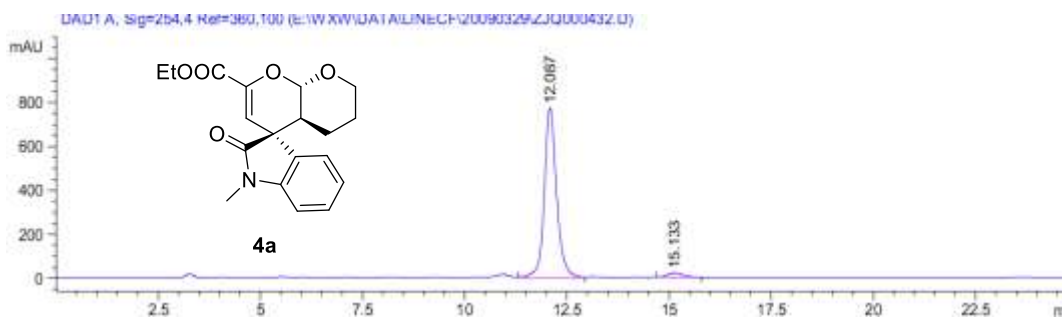

| Peak # | RetTime [min] | Type | Width [min] | Area [mAU*s] | Height [mAU] | Area %  |
|--------|---------------|------|-------------|--------------|--------------|---------|
| 1      | 12.087        | VB   | 0.3099      | 1.60170e4    | 772.60522    | 96.9208 |
| 2      | 15.133        | BB   | 0.3817      | 508.86807    | 20.07600     | 3.0792  |

### Ethyl-(3*S*,4*a*'*S*,8*a*'*S*)-1-methyl-2-oxo-4*a*',6',7',8*a*'-tetrahydro-5'*H*-spiro[indoline-3,4'-pyrano[2,3-*b*]pyran]-2'-carboxylate **4b**

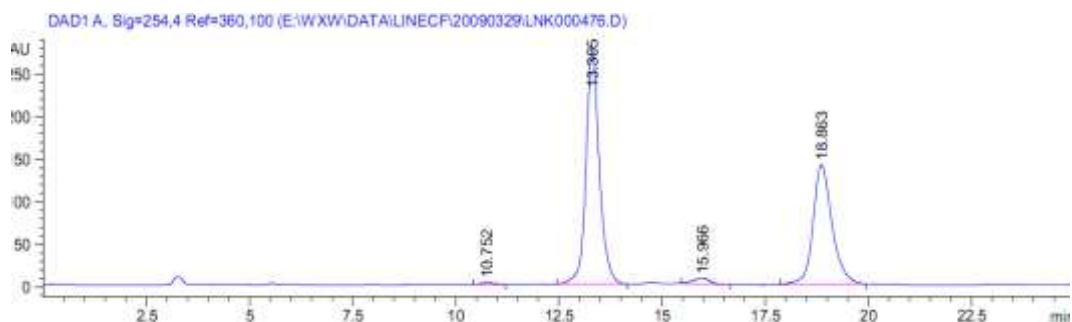

| Peak # | RetTime [min] | Type | Width [min] | Area [mAU*s] | Height [mAU] | Area %  |
|--------|---------------|------|-------------|--------------|--------------|---------|
| 1      | 10.752        | BB   | 0.3003      | 54.88220     | 2.68702      | 0.5001  |
| 2      | 13.305        | BB   | 0.3375      | 6194.37500   | 274.22784    | 56.4408 |
| 3      | 15.966        | BB   | 0.4140      | 192.70087    | 6.93989      | 1.7558  |
| 4      | 18.863        | BB   | 0.4821      | 4533.04590   | 140.61958    | 41.3034 |

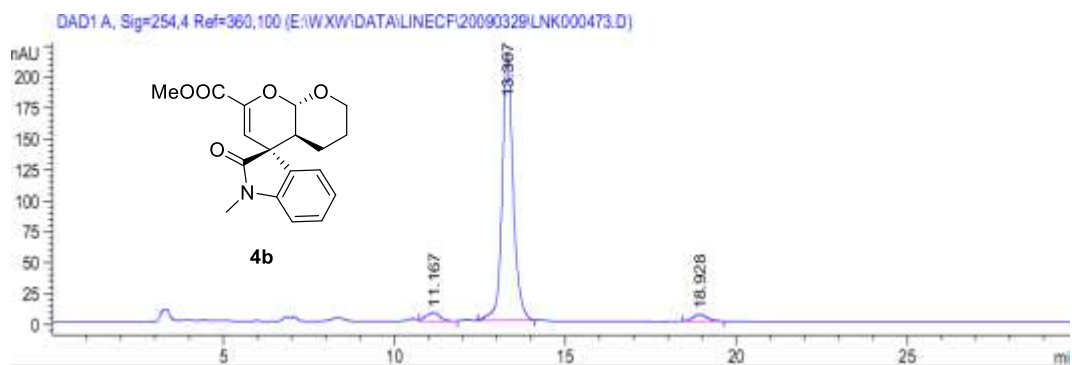

| Peak # | RetTime [min] | Type | Width [min] | Area [mAU*s] | Height [mAU] | Area %  |
|--------|---------------|------|-------------|--------------|--------------|---------|
| 1      | 11.167        | VB   | 0.3886      | 182.03857    | 6.50266      | 3.5533  |
| 2      | 13.307        | BB   | 0.3345      | 4781.81055   | 214.19316    | 93.3390 |
| 3      | 18.928        | BB   | 0.4539      | 159.20613    | 5.30844      | 3.1076  |

**Ethyl-(3*S*,4*a*'*S*,8*a*'*S*)-1-(methoxymethyl)-2-oxo-4*a*',6',7',8*a*'-tetrahydro-5'*H*-spiro [indoline-3,4'-pyrano[2,3-*b*]pyran]-2'-carboxylate **4d****

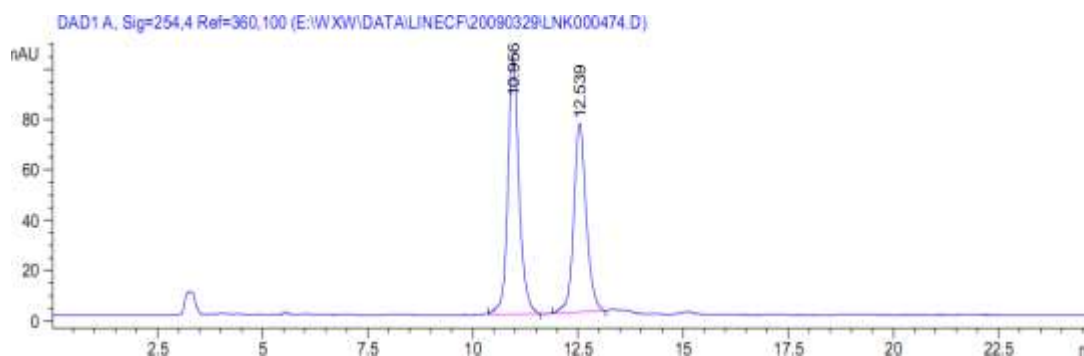



| Peak # | RetTime [min] | Type | Width [min] | Area [mAU*s] | Height [mAU] | Area %  |
|--------|---------------|------|-------------|--------------|--------------|---------|
| 1      | 10.956        | BB   | 0.2773      | 1896.75244   | 102.80277    | 54.9727 |
| 2      | 12.539        | BB   | 0.3135      | 1553.59802   | 75.05650     | 45.0273 |

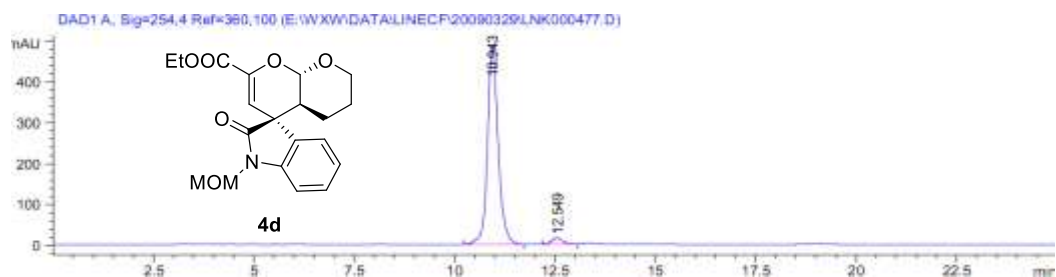

| Peak # | RetTime [min] | Type | Width [min] | Area [mAU*s] | Height [mAU] | Area %  |
|--------|---------------|------|-------------|--------------|--------------|---------|
| 1      | 10.943        | BB   | 0.2779      | 9004.24316   | 486.66345    | 96.7267 |
| 2      | 12.549        | BB   | 0.3066      | 304.70853    | 15.15050     | 3.2733  |

**Ethyl-(3*S*,4*a'**S*,8*a'**S*)-1-allyl-2-oxo-4*a'*,6',7',8*a'*-tetrahydro-5'*H*-spiro[indoline-3,4'-pyrano[2,3-*b*]pyran]-2'-carboxylate 4e**

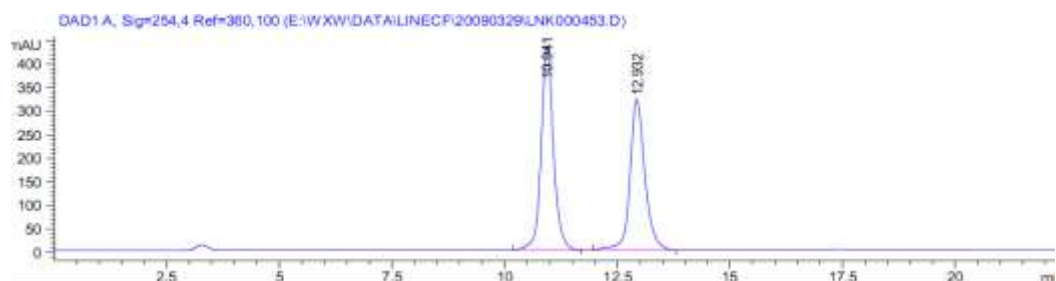

| Peak # | RetTime [min] | Type | Width [min] | Area [mAU*s] | Height [mAU] | Area %  |
|--------|---------------|------|-------------|--------------|--------------|---------|
| 1      | 10.941        | BB   | 0.2855      | 8194.08789   | 431.67407    | 52.8284 |
| 2      | 12.932        | BB   | 0.3435      | 7316.67139   | 319.10590    | 47.1716 |

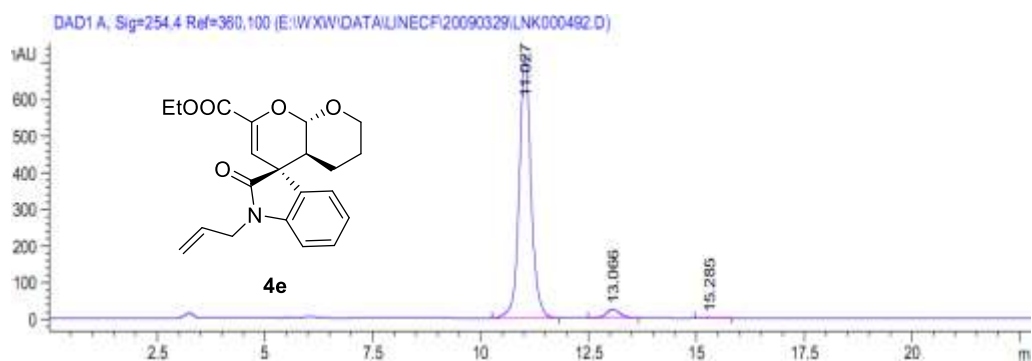

| Peak # | RetTime [min] | Type | Width [min] | Area [mAU*s] | Height [mAU] | Area %  |
|--------|---------------|------|-------------|--------------|--------------|---------|
| 1      | 11.027        | BB   | 0.2854      | 1.35841e4    | 715.71893    | 95.9715 |
| 2      | 13.066        | BB   | 0.3380      | 534.81958    | 23.81756     | 3.7785  |
| 3      | 15.285        | BB   | 0.3568      | 35.39359     | 1.49165      | 0.2501  |

**Ethyl-(3*S*,4*a*'*S*,8*a*'*S*)-1-benzyl-2-oxo-4*a*',6',7',8*a*'-tetrahydro-5'*H*-spiro[indoline-3,4'-pyrano[2,3-*b*]pyran]-2'-carboxylate **4f****

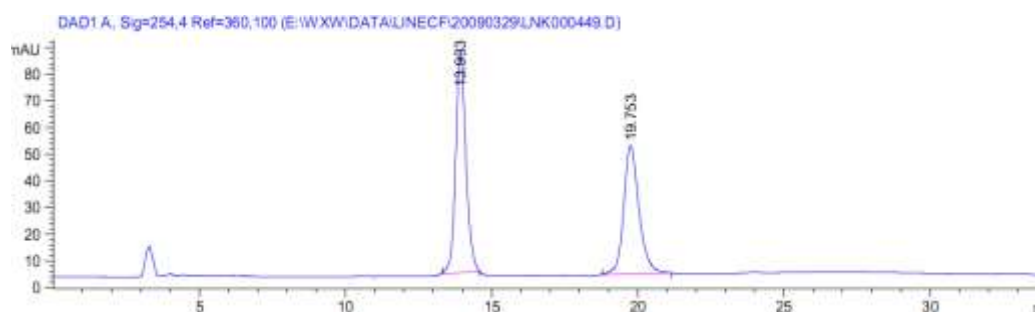

| Peak # | RetTime [min] | Type | Width [min] | Area [mAU*s] | Height [mAU] | Area %  |
|--------|---------------|------|-------------|--------------|--------------|---------|
| 1      | 13.933        | MM R | 0.4044      | 2018.16931   | 83.17106     | 53.4362 |
| 2      | 19.753        | MM R | 0.6075      | 1758.61572   | 48.24860     | 46.5638 |

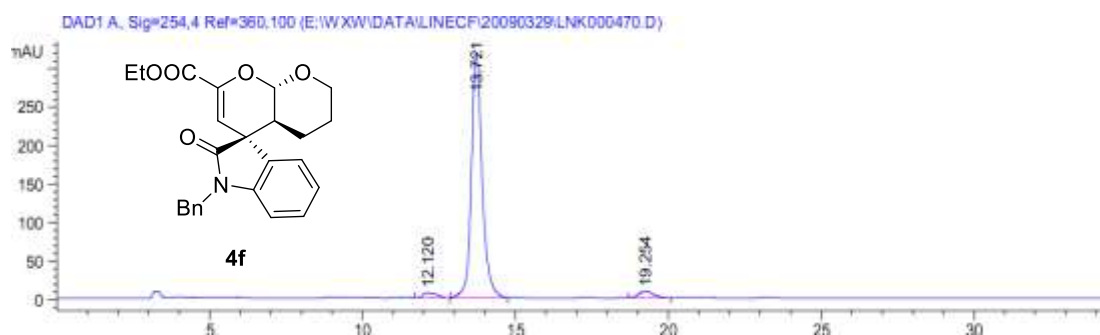

| Peak # | RetTime [min] | Type | Width [min] | Area [mAU*s] | Height [mAU] | Area %  |
|--------|---------------|------|-------------|--------------|--------------|---------|
| 1      | 12.120        | VB   | 0.3932      | 204.05815    | 7.14549      | 2.4711  |
| 2      | 13.721        | BB   | 0.3678      | 7759.70703   | 316.79370    | 93.9695 |
| 3      | 19.254        | BB   | 0.4936      | 293.92038    | 8.89187      | 3.5594  |

**Ethyl-(3*S*,4*a*'*S*,8*a*'*S*)-1-acetyl-2-oxo-4*a*',6',7',8*a*'-tetrahydro-5'*H*-spiro[indoline-3,4'-pyrano[2,3-*b*]pyran]-2'-carboxylate 4g**

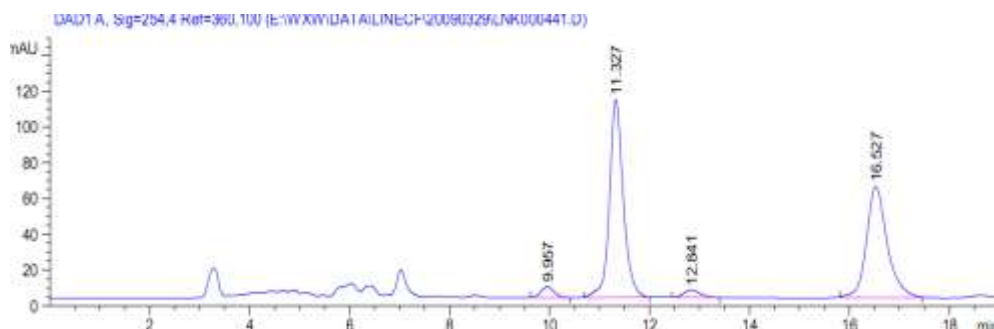

| Peak # | RetTime [min] | Type | Width [min] | Area [mAU*s] | Height [mAU] | Area %  |
|--------|---------------|------|-------------|--------------|--------------|---------|
| 1      | 9.957         | BB   | 0.2798      | 110.86740    | 6.10669      | 2.6876  |
| 2      | 11.327        | BB   | 0.2879      | 2125.10913   | 110.74290    | 51.5158 |
| 3      | 12.841        | BB   | 0.3472      | 91.56317     | 4.02854      | 2.2196  |
| 4      | 16.527        | BB   | 0.4330      | 1797.61816   | 62.23427     | 43.5770 |

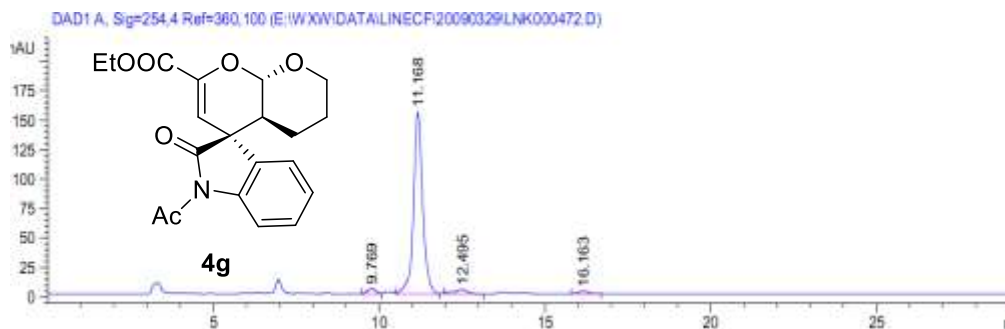

| Peak # | RetTime [min] | Type | Width [min] | Area [mAU*s] | Height [mAU] | Area %  |
|--------|---------------|------|-------------|--------------|--------------|---------|
| 1      | 9.769         | BV   | 0.2524      | 76.65792     | 4.64903      | 2.4027  |
| 2      | 11.168        | VB   | 0.2855      | 2949.37134   | 153.98323    | 92.4414 |
| 3      | 12.495        | BB   | 0.4240      | 111.89490    | 3.72971      | 3.5071  |
| 4      | 16.163        | BB   | 0.3499      | 52.60800     | 2.14678      | 1.6489  |

**Ethyl-(3*S*,4*a*'*S*,8*a*'*S*)-5-fluoro-1-methyl-2-oxo-4*a*',6',7',8*a*'-tetrahydro-5'*H*-spiro[indoline-3,4'-pyrano[2,3-*b*]pyran]-2'-carboxylate 4h**

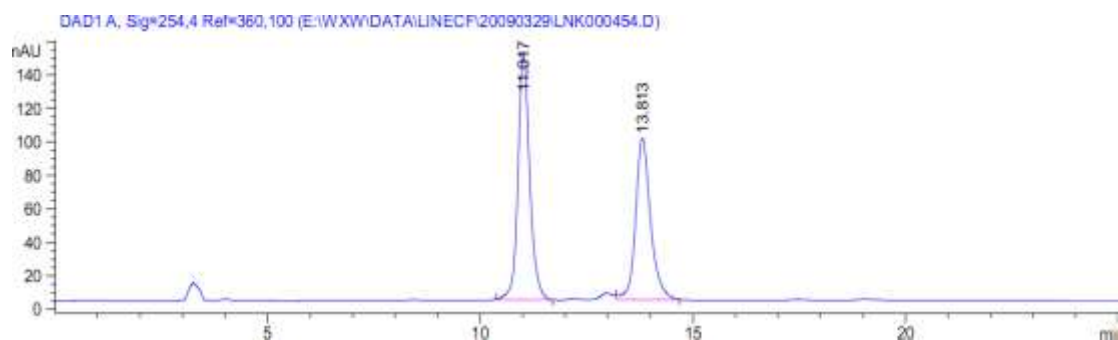

| Peak # | RetTime [min] | Type | Width [min] | Area [mAU*s] | Height [mAU] | Area %  |
|--------|---------------|------|-------------|--------------|--------------|---------|
| 1      | 11.017        | BB   | 0.2878      | 2834.57202   | 147.73360    | 54.4191 |
| 2      | 13.813        | VB   | 0.3669      | 2374.20654   | 96.53751     | 45.5809 |

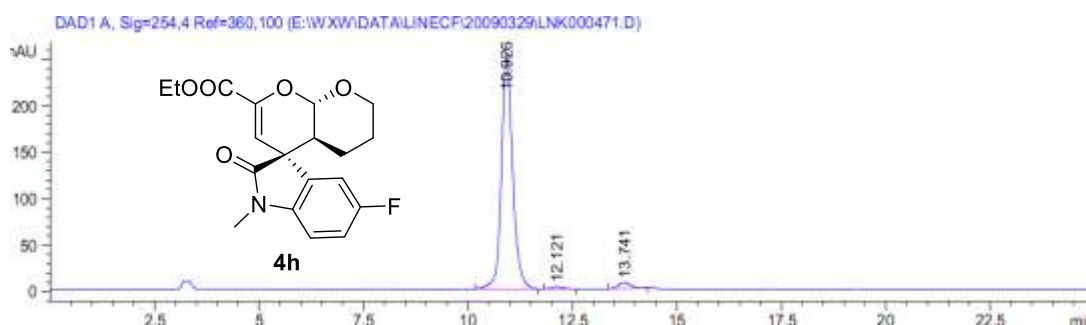

| Peak # | RetTime [min] | Type | Width [min] | Area [mAU*s] | Height [mAU] | Area %  |
|--------|---------------|------|-------------|--------------|--------------|---------|
| 1      | 10.926        | BB   | 0.2760      | 4708.45117   | 254.34621    | 96.3520 |
| 2      | 12.121        | BB   | 0.2843      | 48.59465     | 2.55041      | 0.9944  |
| 3      | 13.741        | BB   | 0.3219      | 129.67451    | 6.30725      | 2.6536  |

**Ethyl-(3*S*,4*a'**S*,8*a'**S*)-5-chloro-1-methyl-2-oxo-4*a'*,6',7',8*a'*-tetrahydro-5'*H*-spiro [indoline-3,4'-pyrano[2,3-*b*]pyran]-2'-carboxylate 4i**

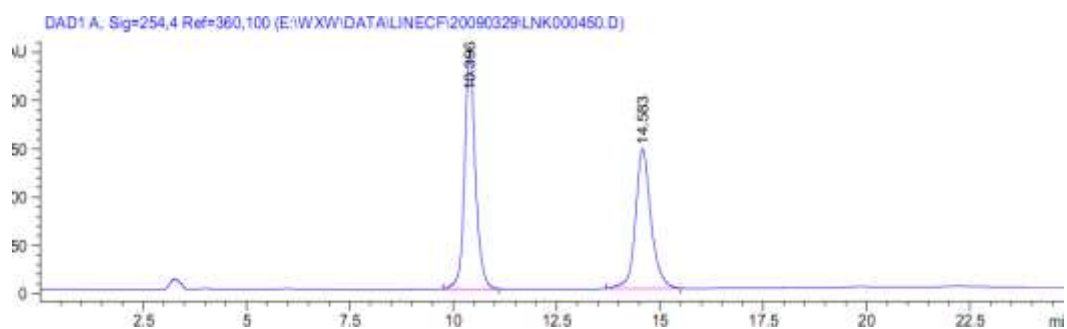

| Peak # | RetTime [min] | Type | Width [min] | Area [mAU*s] | Height [mAU] | Area %  |
|--------|---------------|------|-------------|--------------|--------------|---------|
| 1      | 10.396        | BB   | 0.2724      | 4454.45752   | 244.68129    | 53.9118 |
| 2      | 14.583        | BB   | 0.3949      | 3808.03027   | 144.73979    | 46.0882 |

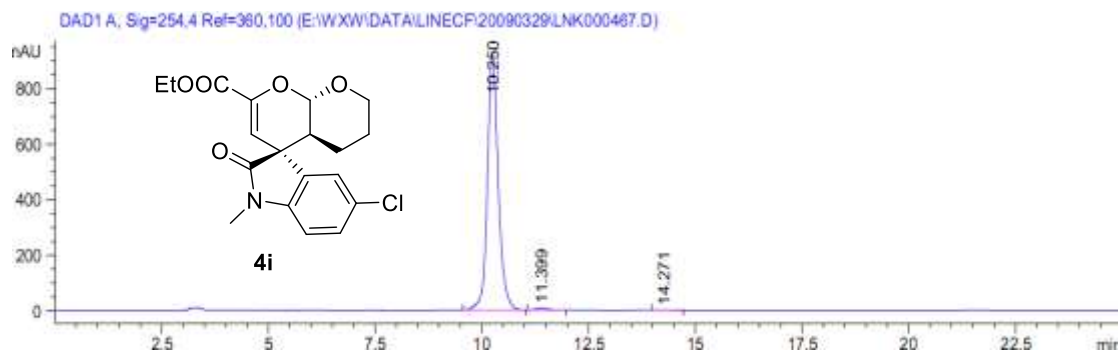

| Peak # | RetTime [min] | Type | Width [min] | Area [mAU*s] | Height [mAU] | Area %  |
|--------|---------------|------|-------------|--------------|--------------|---------|
| 1      | 10.250        | BB   | 0.2641      | 1.63457e4    | 925.41730    | 98.8751 |
| 2      | 11.399        | BB   | 0.2957      | 157.20070    | 7.98390      | 0.9509  |
| 3      | 14.271        | BB   | 0.3126      | 28.75981     | 1.37202      | 0.1740  |

**Ethyl-(3S,4a'S,8a'S)-5-bromo-1-methyl-2-oxo-4a',6',7',8a'-tetrahydro-5'H-spiro [indoline-3,4'-pyrano[2,3-b]pyran]-2'-carboxylate 4j**

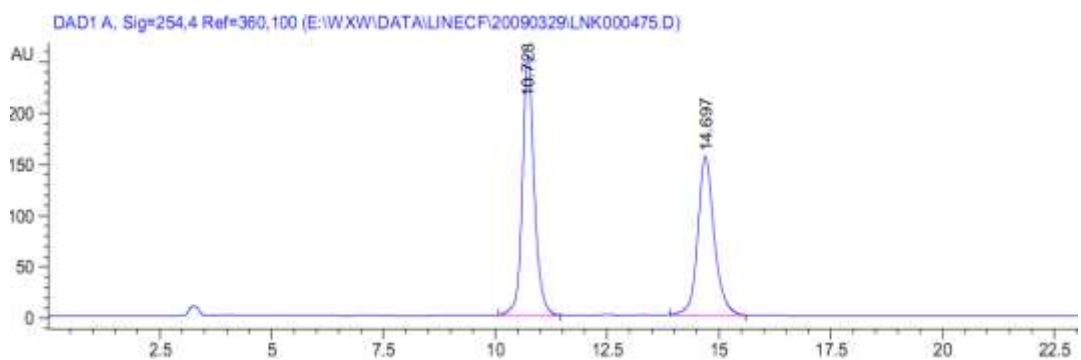

| Peak # | RetTime [min] | Type | Width [min] | Area [mAU*s] | Height [mAU] | Area %  |
|--------|---------------|------|-------------|--------------|--------------|---------|
| 1      | 10.728        | BB   | 0.2767      | 4665.54639   | 253.49553    | 53.9320 |
| 2      | 14.697        | BB   | 0.3861      | 3985.25464   | 154.91707    | 46.0680 |

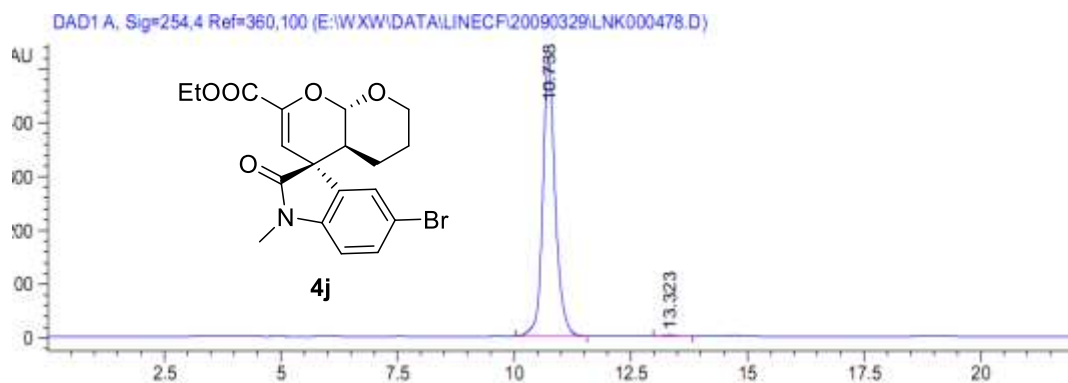

| Peak # | RetTime [min] | Type | Width [min] | Area [mAU*s] | Height [mAU] | Area %  |
|--------|---------------|------|-------------|--------------|--------------|---------|
| 1      | 10.738        | BB   | 0.2779      | 9683.71094   | 518.58679    | 99.5324 |
| 2      | 13.323        | BB   | 0.3220      | 45.49331     | 2.15739      | 0.4676  |

**Ethyl-(3*S*,4*a*'*S*,8*a*'*S*)-5-methoxy-1-methyl-2-oxo-4*a*',6',7',8*a*'-tetrahydro-5'*H*-spiro[indoline-3,4'-pyrano[2,3-*b*]pyran]-2'-carboxylate 4k**

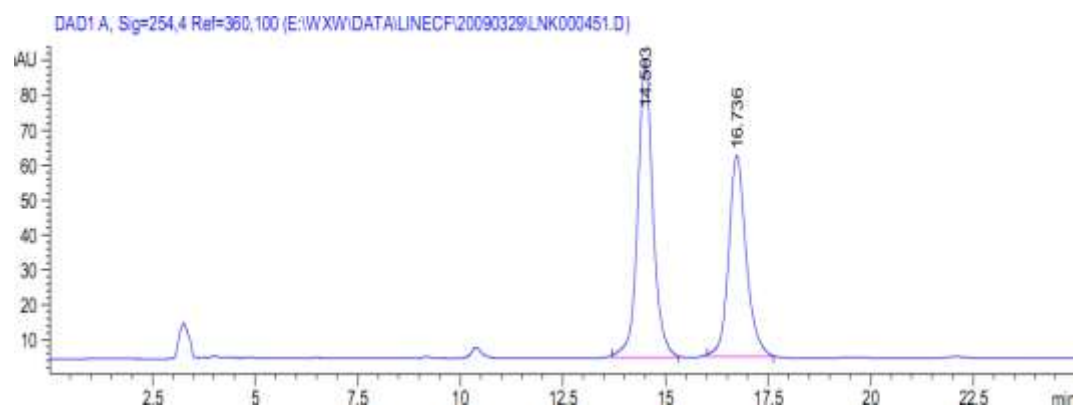

| Peak # | RetTime [min] | Type | Width [min] | Area [mAU*s] | Height [mAU] | Area %  |
|--------|---------------|------|-------------|--------------|--------------|---------|
| 1      | 14.503        | BB   | 0.3872      | 2190.33447   | 84.83643     | 56.0969 |
| 2      | 16.736        | BB   | 0.4467      | 1714.21924   | 57.68462     | 43.9031 |

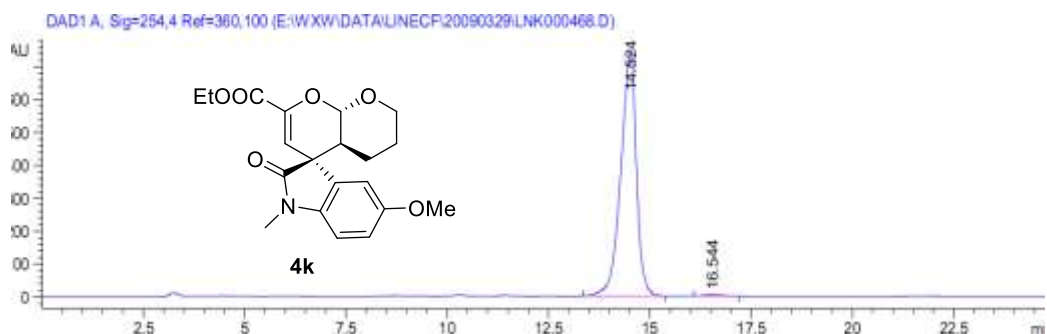

| Peak # | RetTime [min] | Type | Width [min] | Area [mAU*s] | Height [mAU] | Area %  |
|--------|---------------|------|-------------|--------------|--------------|---------|
| 1      | 14.524        | BB   | 0.4046      | 1.98912e4    | 742.25098    | 99.3367 |
| 2      | 16.544        | BB   | 0.4180      | 132.81369    | 4.81237      | 0.6633  |

**Ethyl-(3*S*,4*a'**S*,8*a'**S*)-1,5,7-trimethyl-2-oxo-4*a'*,6',7',8*a'*-tetrahydro-5'*H*-spiro [indoline-3,4'-pyrano[2,3-*b*]pyran]-2'-carboxylate 4l**

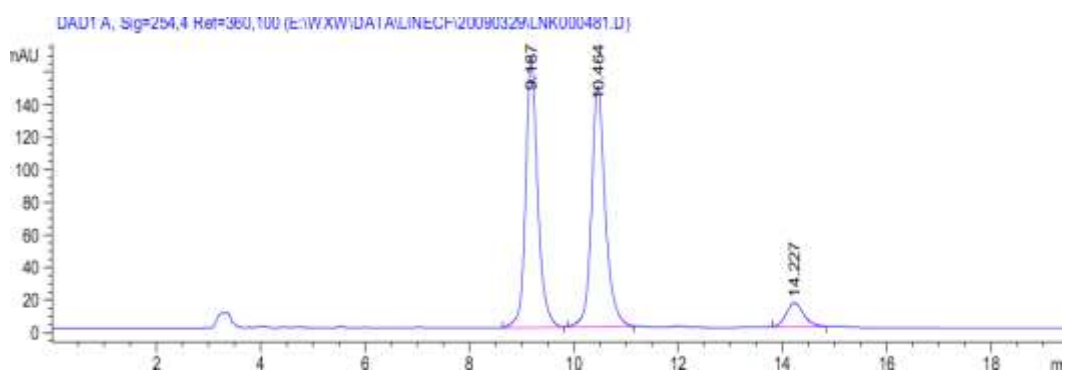

| Peak # | RetTime [min] | Type | Width [min] | Area [mAU*s] | Height [mAU] | Area %  |
|--------|---------------|------|-------------|--------------|--------------|---------|
| 1      | 9.187         | BB   | 0.2416      | 2667.77417   | 165.88712    | 46.6740 |
| 2      | 10.464        | BB   | 0.2744      | 2708.00146   | 147.33783    | 47.3778 |
| 3      | 14.227        | BB   | 0.3554      | 339.98495    | 14.61717     | 5.9482  |

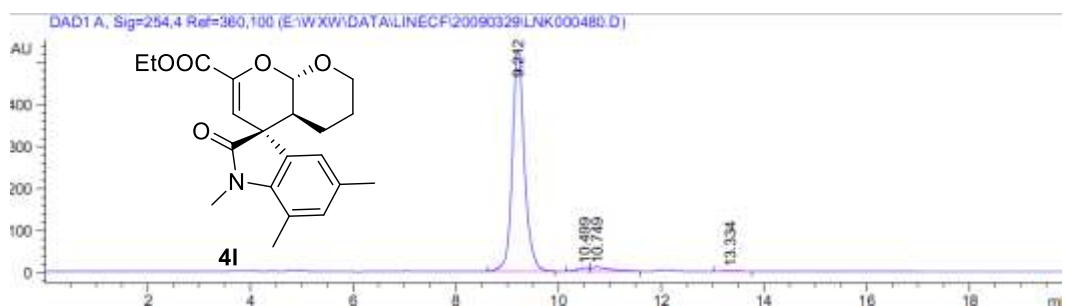

| Peak # | RetTime [min] | Type | Width [min] | Area [mAU*s] | Height [mAU] | Area %  |
|--------|---------------|------|-------------|--------------|--------------|---------|
| 1      | 9.212         | BB   | 0.2445      | 8591.64063   | 526.04712    | 95.3137 |
| 2      | 10.499        | BV   | 0.2226      | 125.16537    | 8.56043      | 1.3886  |
| 3      | 10.749        | VB   | 0.3821      | 267.00815    | 9.32289      | 2.9621  |
| 4      | 13.334        | BB   | 0.3083      | 30.25476     | 1.42164      | 0.3356  |

**Ethyl-(3*S*,4*a'**S*,8*a'**S*)-6-chloro-1-methyl-2-oxo-4*a'*,6',7',8*a'*-tetrahydro-5'*H*-spiro [indoline-3,4'-pyrano[2,3-*b*]pyran]-2'-carboxylate 4m**

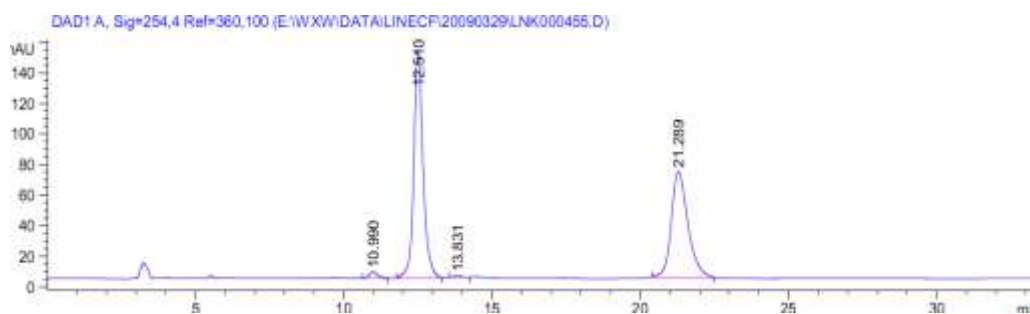

| Peak # | RetTime [min] | Type | Width [min] | Area [mAU*s] | Height [mAU] | Area %  |
|--------|---------------|------|-------------|--------------|--------------|---------|
| 1      | 10.990        | BB   | 0.3055      | 84.59505     | 4.15579      | 1.3936  |
| 2      | 12.510        | BB   | 0.3261      | 3242.03125   | 148.86288    | 53.4069 |
| 3      | 13.831        | BB   | 0.2731      | 20.87761     | 1.16491      | 0.3439  |
| 4      | 21.289        | BB   | 0.5905      | 2722.93115   | 69.59356     | 44.8556 |

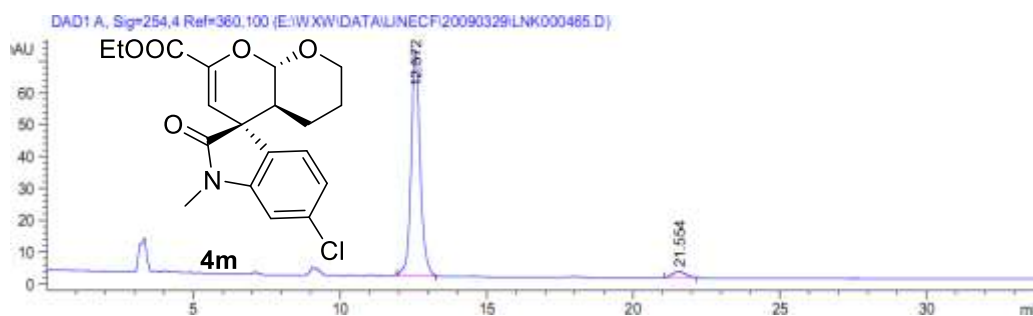

| Peak # | RetTime [min] | Type | Width [min] | Area [mAU*s] | Height [mAU] | Area %  |
|--------|---------------|------|-------------|--------------|--------------|---------|
| 1      | 12.572        | BB   | 0.3212      | 1513.23401   | 70.84232     | 96.5902 |
| 2      | 21.554        | MM R | 0.5124      | 53.42019     | 1.73742      | 3.4098  |

**Ethyl-(3*S*,4*a'**S*,8*a'**S*)-7-fluoro-1-methyl-2-oxo-4*a'*,6',7',8*a'*-tetrahydro-5'*H*-spiro [indoline-3,4'-pyrano[2,3-*b*]pyran]-2'-carboxylate 4n**



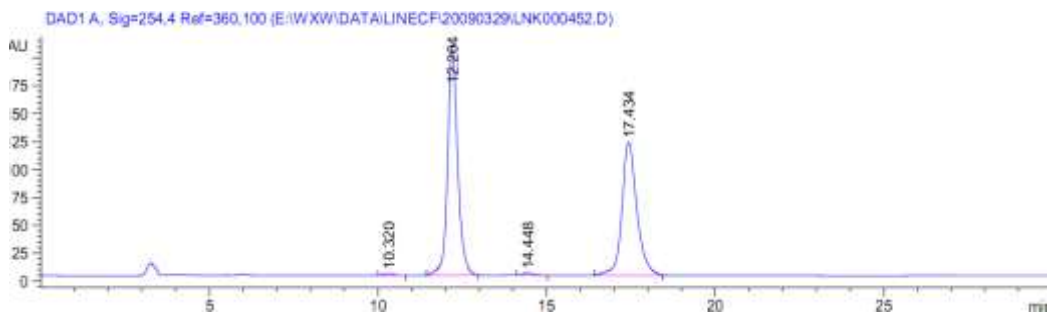

| Peak # | RetTime [min] | Type | Width [min] | Area [mAU*s] | Height [mAU] | Area %  |
|--------|---------------|------|-------------|--------------|--------------|---------|
| 1      | 10.320        | BB   | 0.2928      | 35.94599     | 1.89945      | 0.4491  |
| 2      | 12.204        | BB   | 0.3105      | 4245.49121   | 204.24701    | 53.0391 |
| 3      | 14.448        | BB   | 0.3516      | 43.33517     | 1.90386      | 0.5414  |
| 4      | 17.434        | BB   | 0.4631      | 3679.67749   | 119.55741    | 45.9704 |

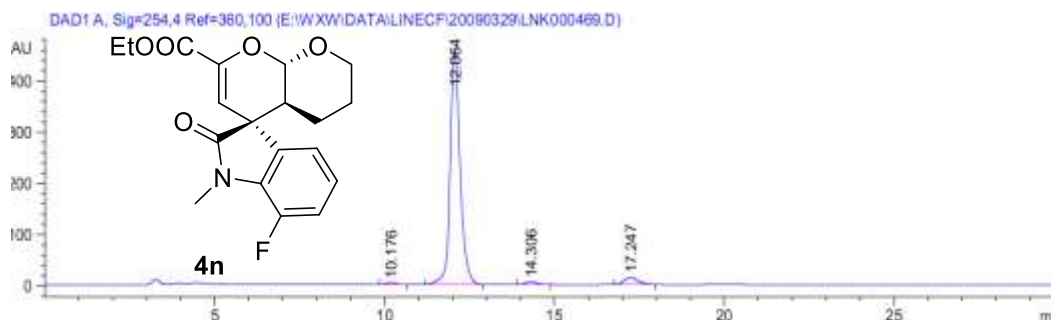

| Peak # | RetTime [min] | Type | Width [min] | Area [mAU*s] | Height [mAU] | Area %  |
|--------|---------------|------|-------------|--------------|--------------|---------|
| 1      | 10.176        | BB   | 0.2932      | 68.15168     | 3.56302      | 0.6871  |
| 2      | 12.064        | BB   | 0.3055      | 9337.32910   | 458.69473    | 94.1320 |
| 3      | 14.306        | BB   | 0.3501      | 123.70676    | 5.42459      | 1.2471  |
| 4      | 17.247        | BB   | 0.4278      | 390.21054    | 13.80235     | 3.9338  |

**Ethyl-(3*S*,4*a'**S*,8*a'**S*)-1,7-dimethyl-2-oxo-4*a'*,6',7',8*a'*-tetrahydro-5*H*-spiro [indoline-3,4'-pyrano[2,3-*b*]pyran]-2'-carboxylate 4o**

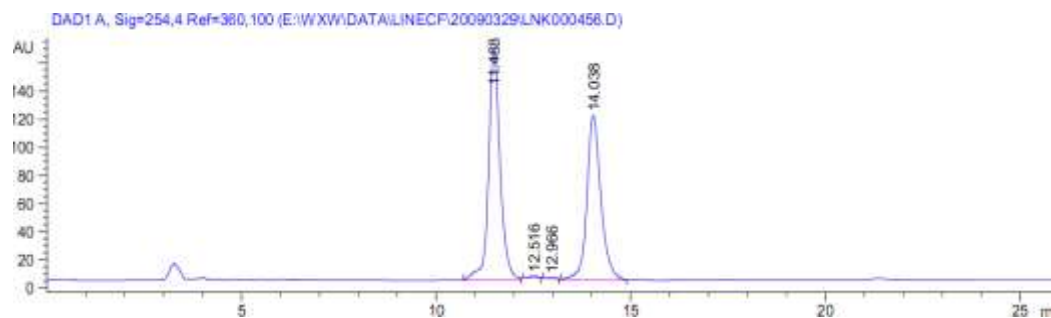

| Peak # | RetTime [min] | Type | Width [min] | Area [mAU*s] | Height [mAU] | Area %  |
|--------|---------------|------|-------------|--------------|--------------|---------|
| 1      | 11.488        | BB   | 0.3060      | 3380.42969   | 164.30180    | 53.2745 |
| 2      | 12.516        | MM R | 0.2236      | 19.70224     | 1.46831      | 0.3105  |
| 3      | 12.966        | MM R | 0.2464      | 13.96570     | 9.44507e-1   | 0.2201  |
| 4      | 14.038        | VB   | 0.3739      | 2931.21045   | 117.14506    | 46.1949 |

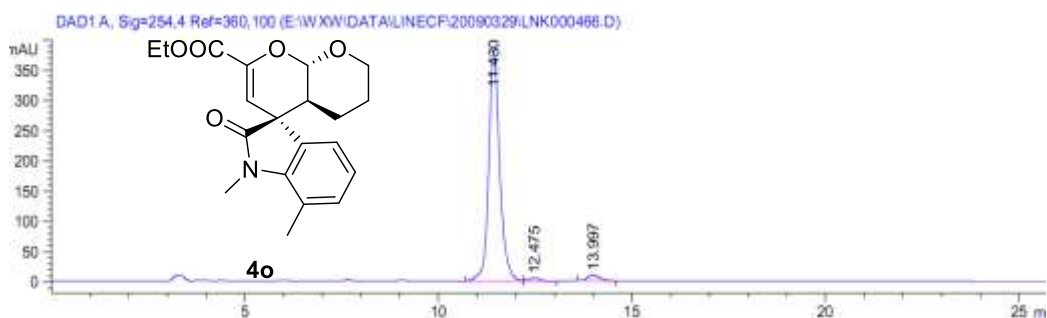

| Peak # | RetTime [min] | Type | Width [min] | Area [mAU*s] | Height [mAU] | Area %  |
|--------|---------------|------|-------------|--------------|--------------|---------|
| 1      | 11.430        | BB   | 0.2960      | 7501.94043   | 380.56445    | 95.8281 |
| 2      | 12.475        | BB   | 0.3164      | 101.46614    | 5.13864      | 1.2961  |
| 3      | 13.997        | BB   | 0.3476      | 225.13338    | 9.81604      | 2.8758  |

**Ethyl-(3a*S*,4*S*,7a*R*)-1'-methyl-2'-oxo-2,3,3a,7a-tetrahydrospiro[furo[2,3-*b*]pyran-4,3'-indoline]-6-carboxylate **3a****

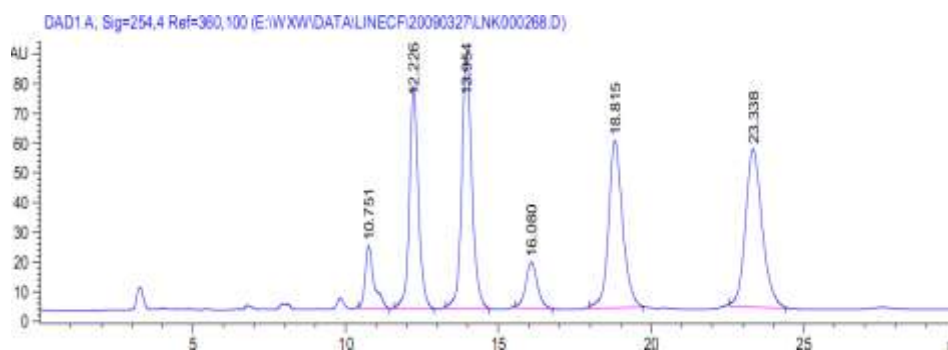

| Peak # | RetTime [min] | Type | Width [min] | Area [mAU*s] | Height [mAU] | Area %  |
|--------|---------------|------|-------------|--------------|--------------|---------|
| 1      | 10.751        | BB   | 0.2965      | 430.66455    | 21.07034     | 5.2725  |
| 2      | 12.226        | BB   | 0.3056      | 1524.06018   | 74.84279     | 18.6587 |
| 3      | 13.954        | BB   | 0.3442      | 1964.79907   | 85.47923     | 24.0545 |
| 4      | 16.080        | BB   | 0.4011      | 418.91193    | 15.61116     | 5.1286  |
| 5      | 18.815        | BB   | 0.4819      | 1803.22607   | 56.26804     | 22.0764 |
| 6      | 23.338        | BB   | 0.5805      | 2026.43823   | 53.19208     | 24.8092 |

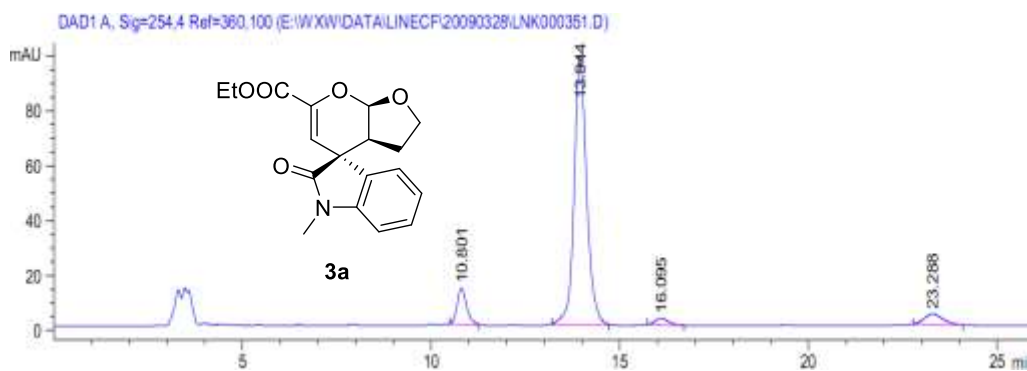

| Peak # | RetTime [min] | Type | Width [min] | Area [mAU*s] | Height [mAU] | Area %  |
|--------|---------------|------|-------------|--------------|--------------|---------|
| 1      | 10.801        | BB   | 0.2670      | 238.85457    | 13.46161     | 8.8673  |
| 2      | 13.944        | BB   | 0.3471      | 2261.82666   | 98.07587     | 83.9691 |
| 3      | 16.095        | BB   | 0.3690      | 58.42741     | 2.44328      | 2.1691  |
| 4      | 23.288        | BB   | 0.5208      | 134.53406    | 3.78362      | 4.9945  |

**Ethyl-(3a*S*,4*S*,7a*R*)-5'-chloro-1'-methyl-2'-oxo-2,3,3a,7a-tetrahydrospiro[furo[2,3-*b*]pyran-4,3'-indoline]-6-carboxylate **3b****

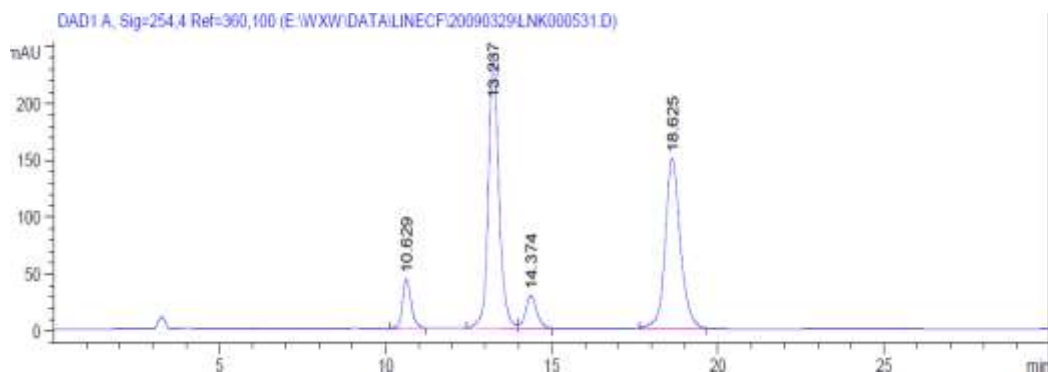

| Peak # | RetTime [min] | Type | Width [min] | Area [mAU*s] | Height [mAU] | Area %  |
|--------|---------------|------|-------------|--------------|--------------|---------|
| 1      | 10.629        | BB   | 0.2701      | 786.42365    | 43.66556     | 6.7838  |
| 2      | 13.237        | BB   | 0.3363      | 5356.98096   | 240.07552    | 46.2104 |
| 3      | 14.374        | BB   | 0.3599      | 696.31366    | 29.23241     | 6.0065  |
| 4      | 18.625        | BB   | 0.4779      | 4752.87549   | 149.90973    | 40.9992 |

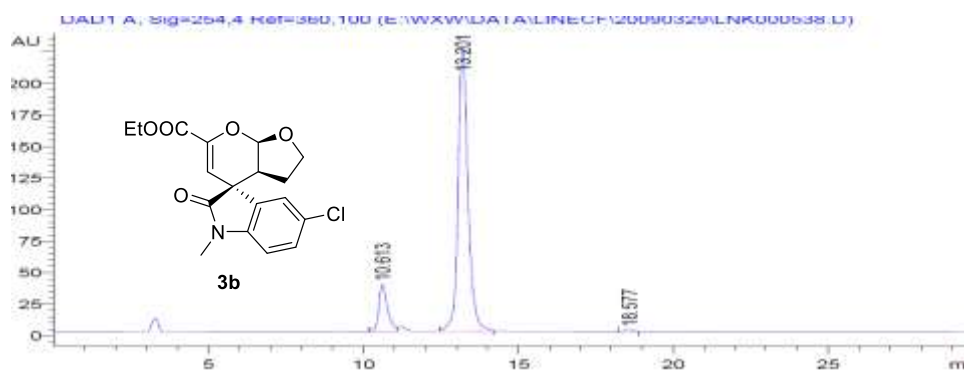

| Peak # | RetTime [min] | Type | Width [min] | Area [mAU*s] | Height [mAU] | Area %  |
|--------|---------------|------|-------------|--------------|--------------|---------|
| 1      | 10.613        | BV   | 0.2859      | 734.50970    | 37.60733     | 12.7552 |
| 2      | 13.201        | BB   | 0.3337      | 4996.41260   | 224.43411    | 86.7657 |
| 3      | 18.577        | MM R | 0.3798      | 27.58817     | 1.21064      | 0.4791  |

**Ethyl-(3a*S*,4*S*,7a*R*)-5'-bromo-1'-methyl-2'-oxo-2,3,3a,7a-tetrahydrospiro[furo[2,3-*b*]pyran-4,3'-indoline]-6-carboxylate **3c****

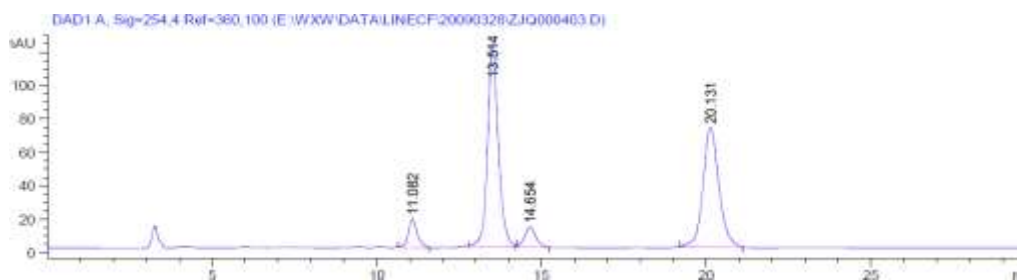

| Peak # | RetTime [min] | Type | Width [min] | Area [mAU*s] | Height [mAU] | Area %  |
|--------|---------------|------|-------------|--------------|--------------|---------|
| 1      | 11.082        | BB   | 0.2895      | 332.47650    | 17.19897     | 5.7236  |
| 2      | 13.514        | BB   | 0.3422      | 2758.70532   | 120.91506    | 47.4910 |
| 3      | 14.654        | BB   | 0.3635      | 293.25732    | 12.06721     | 5.0484  |
| 4      | 20.131        | BB   | 0.5127      | 2424.46533   | 71.65974     | 41.7370 |

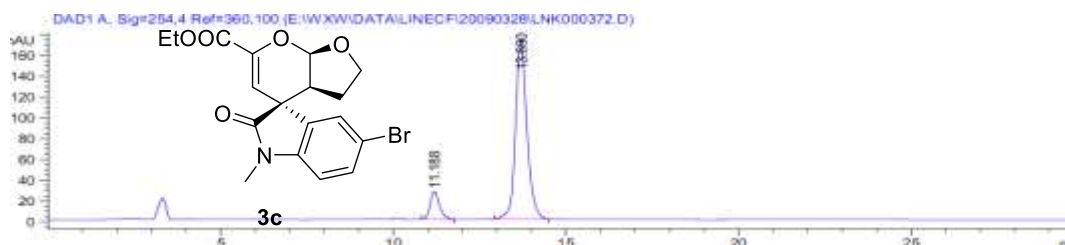

| Peak # | RetTime [min] | Type | Width [min] | Area [mAU*s] | Height [mAU] | Area %  |
|--------|---------------|------|-------------|--------------|--------------|---------|
| 1      | 11.188        | BB   | 0.2856      | 507.82199    | 26.73195     | 11.3762 |
| 2      | 13.690        | BB   | 0.3484      | 3956.09229   | 170.67818    | 88.6238 |

**Ethyl-(3a*S*,4*S*,7a*R*)-5'-methoxy-1'-methyl-2'-oxo-2,3,3a,7a-tetrahydrospiro[furo[2,3-*b*]pyran-4,3'-indoline]-6-carboxylate 3d**

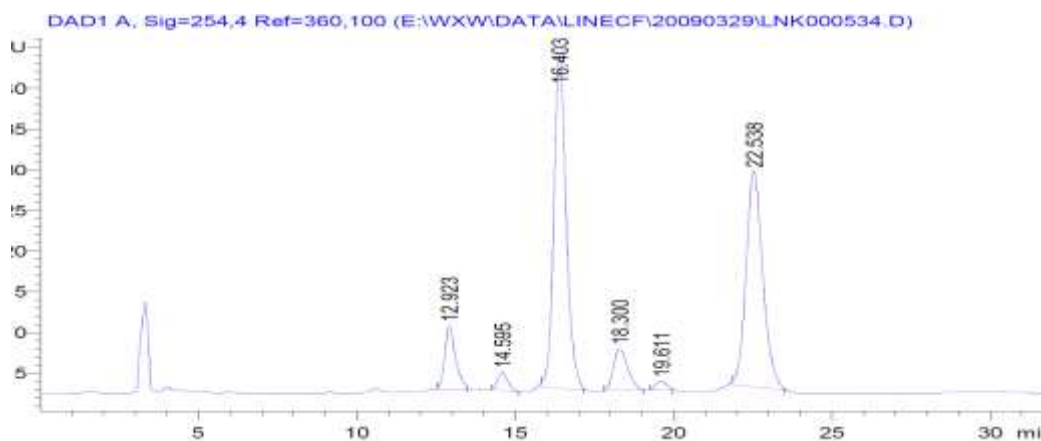

| Peak # | RetTime [min] | Type | Width [min] | Area [mAU*s] | Height [mAU] | Area %  |
|--------|---------------|------|-------------|--------------|--------------|---------|
| 1      | 12.923        | BB   | 0.3447      | 181.47644    | 7.76368      | 7.2576  |
| 2      | 14.595        | BB   | 0.3318      | 50.73218     | 2.27792      | 2.0289  |
| 3      | 16.403        | BB   | 0.4124      | 1108.98450   | 40.88911     | 44.3504 |
| 4      | 18.300        | BB   | 0.4644      | 160.84711    | 5.12163      | 6.4326  |
| 5      | 19.611        | MM R | 0.4150      | 27.06433     | 1.08689      | 1.0824  |
| 6      | 22.538        | BB   | 0.5628      | 971.40411    | 26.42713     | 38.8483 |

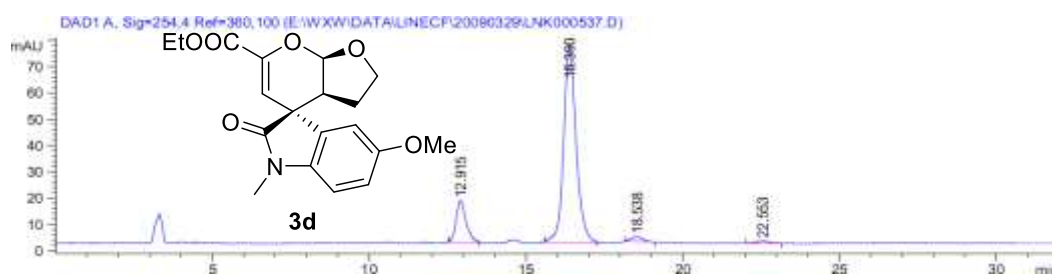

| Peak # | RetTime [min] | Type | Width [min] | Area [mAU*s] | Height [mAU] | Area %  |
|--------|---------------|------|-------------|--------------|--------------|---------|
| 1      | 12.915        | BB   | 0.3339      | 349.98914    | 15.83376     | 14.1639 |
| 2      | 16.390        | BB   | 0.4144      | 2052.26880   | 74.25538     | 83.0541 |
| 3      | 18.538        | BB   | 0.3739      | 44.98888     | 1.69358      | 1.8207  |
| 4      | 22.553        | MM R | 0.5438      | 23.75512     | 7.28012e-1   | 0.9614  |

**Ethyl-(3a*S*,4*S*,7a*R*)-6'-chloro-1'-methyl-2'-oxo-2,3,3a,7a-tetrahydrospiro[furo[2,3-*b*]pyran-4,3'-indoline]-6-carboxylate 3e**

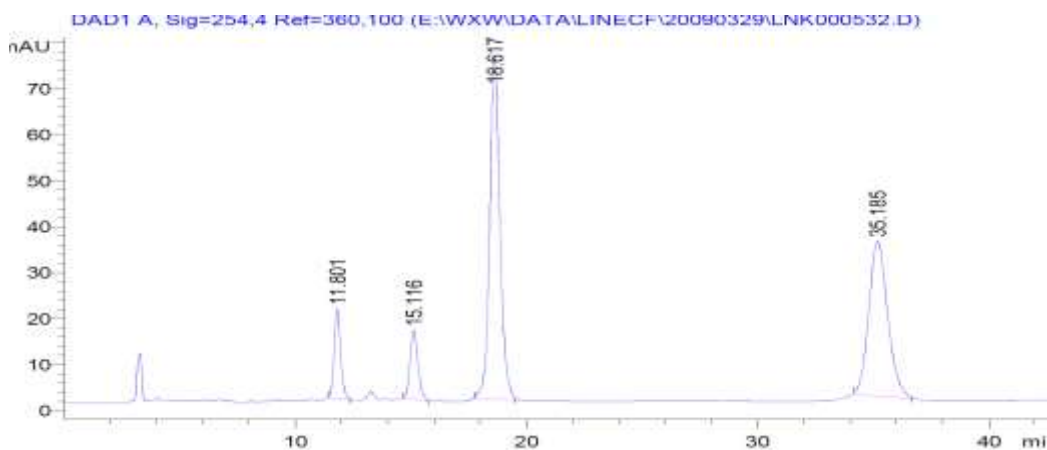

| Peak # | RetTime [min] | Type | Width [min] | Area [mAU*s] | Height [mAU] | Area %  |
|--------|---------------|------|-------------|--------------|--------------|---------|
| 1      | 11.801        | BB   | 0.2912      | 377.18604    | 19.54281     | 7.6232  |
| 2      | 15.116        | BB   | 0.3599      | 353.62659    | 14.95205     | 7.1471  |
| 3      | 18.617        | BB   | 0.4654      | 2307.94507   | 74.92004     | 46.6454 |
| 4      | 35.185        | BB   | 0.8552      | 1909.09387   | 33.68399     | 38.5843 |

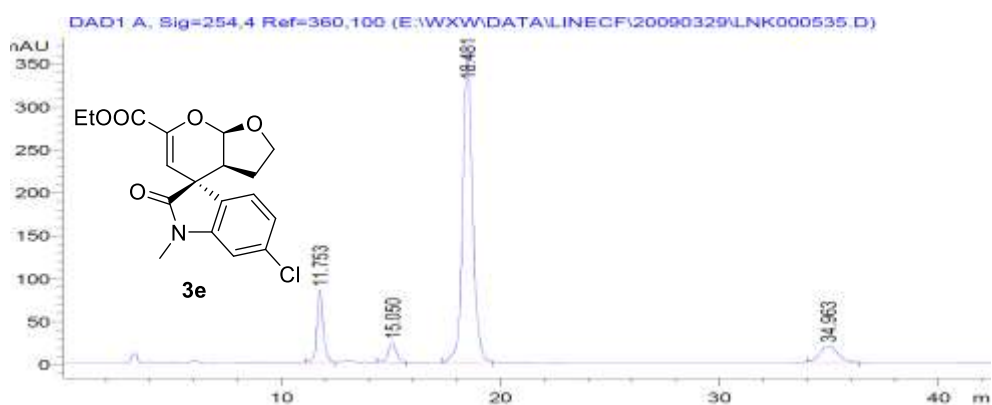

| Peak # | RetTime [min] | Type | Width [min] | Area [mAU*s] | Height [mAU] | Area %  |
|--------|---------------|------|-------------|--------------|--------------|---------|
| 1      | 11.753        | BB   | 0.2999      | 1678.19324   | 83.70175     | 11.5652 |
| 2      | 15.050        | BB   | 0.3811      | 573.53693    | 22.67105     | 3.9525  |
| 3      | 18.481        | BB   | 0.4705      | 1.12107e4    | 358.81314    | 77.2577 |
| 4      | 34.963        | BB   | 0.8397      | 1048.34155   | 18.76808     | 7.2246  |

**Ethyl-(3*R*)-5-bromo-2'-methoxy-1,2'-dimethyl-2-oxo-2',3'-dihydrospiro[indoline-3,4'-pyran]-6'-carboxylate 5**

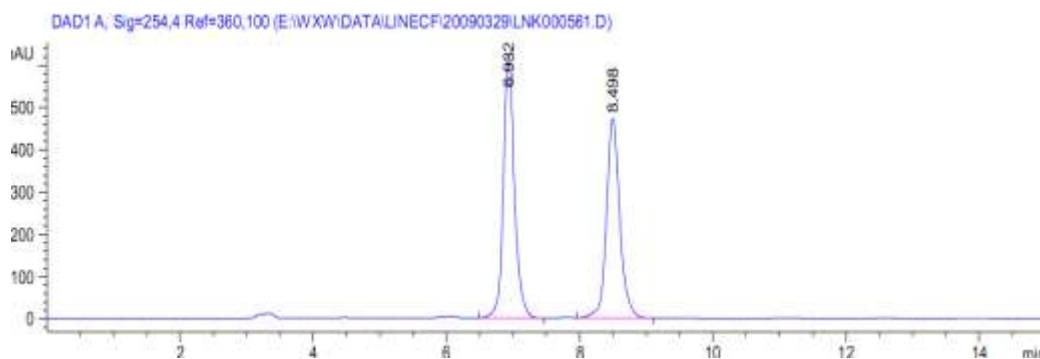

| Peak # | RetTime [min] | Type | Width [min] | Area [mAU*s] | Height [mAU] | Area %  |
|--------|---------------|------|-------------|--------------|--------------|---------|
| 1      | 6.932         | BB   | 0.1738      | 7150.37744   | 623.34607    | 52.2221 |
| 2      | 8.498         | VB   | 0.2071      | 6541.85889   | 473.73734    | 47.7779 |

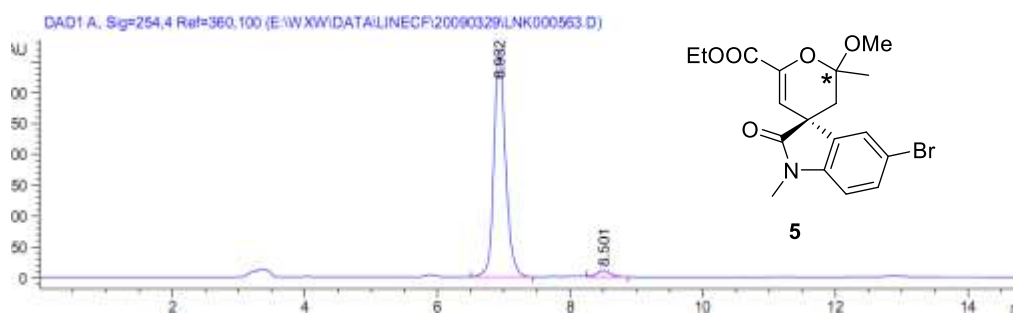

| Peak # | RetTime [min] | Type | Width [min] | Area [mAU*s] | Height [mAU] | Area %  |
|--------|---------------|------|-------------|--------------|--------------|---------|
| 1      | 6.932         | BB   | 0.1833      | 4431.47803   | 365.97577    | 96.7341 |
| 2      | 8.501         | BB   | 0.2184      | 149.61469    | 10.36438     | 3.2659  |

**Ethyl-(S,E)-3-(5-bromo-1-methyl-2-oxo-3-(2-(phenylthio)vinyl)indolin-3-yl)-2-oxopropanoate 6**

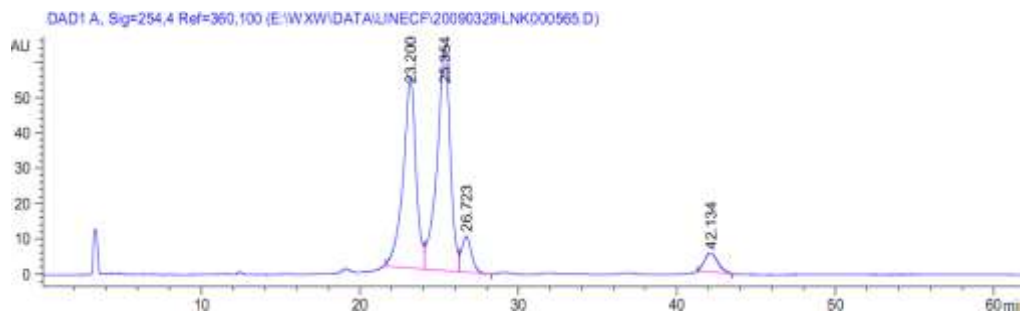

| Peak # | RetTime [min] | Type | Width [min] | Area [mAU*s] | Height [mAU] | Area %  |
|--------|---------------|------|-------------|--------------|--------------|---------|
| 1      | 23.200        | BV   | 0.8133      | 3050.51318   | 54.14260     | 40.7615 |
| 2      | 25.354        | VV   | 0.8521      | 3674.71167   | 63.22395     | 49.1022 |
| 3      | 26.723        | VB   | 0.6306      | 439.76517    | 10.20808     | 5.8762  |
| 4      | 42.134        | BB   | 0.7594      | 318.81830    | 5.36433      | 4.2601  |

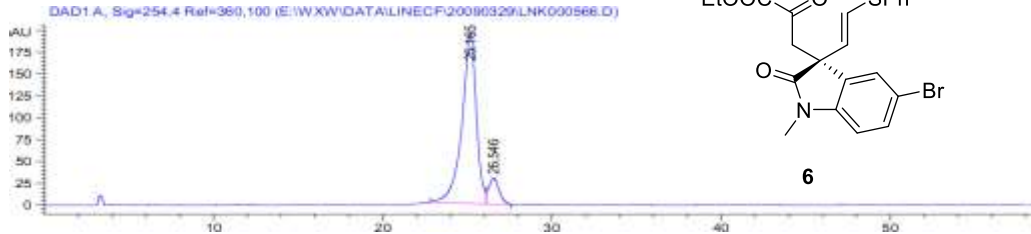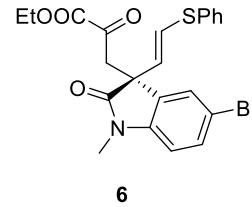

| Peak # | RetTime [min] | Type | Width [min] | Area [mAU*s] | Height [mAU] | Area %  |
|--------|---------------|------|-------------|--------------|--------------|---------|
| 1      | 25.165        | BV   | 0.8635      | 1.15330e4    | 194.57463    | 90.1348 |
| 2      | 26.546        | VB   | 0.6352      | 1262.28638   | 29.61836     | 9.8652  |

**Ethyl-3-(5-bromo-3-(2,3-dimethyl-3H-indol-3-yl)-1-methyl-2-oxindolin-3-yl)-2-oxopropanoate 7**

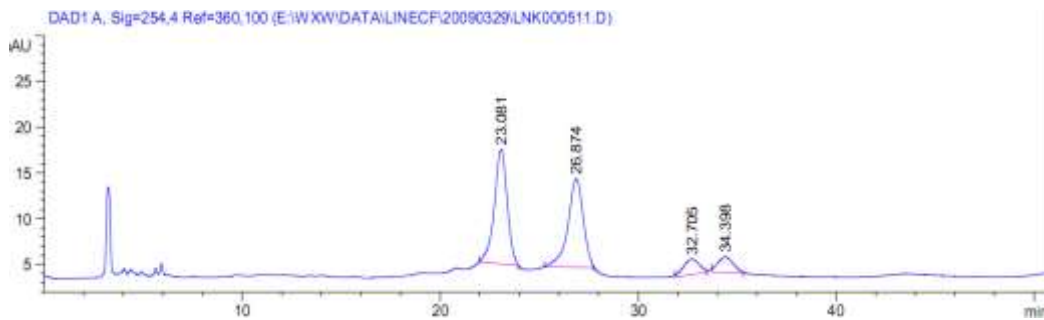

| Peak # | RetTime [min] | Type | Width [min] | Area [mAU*s] | Height [mAU] | Area %  |
|--------|---------------|------|-------------|--------------|--------------|---------|
| 1      | 23.081        | MM R | 0.7502      | 563.14813    | 12.51120     | 44.5178 |
| 2      | 26.874        | MM R | 0.8934      | 519.87250    | 9.69842      | 41.0968 |
| 3      | 32.705        | MM R | 0.9197      | 91.24595     | 1.65346      | 7.2131  |
| 4      | 34.398        | MM R | 0.9039      | 90.72884     | 1.67285      | 7.1723  |

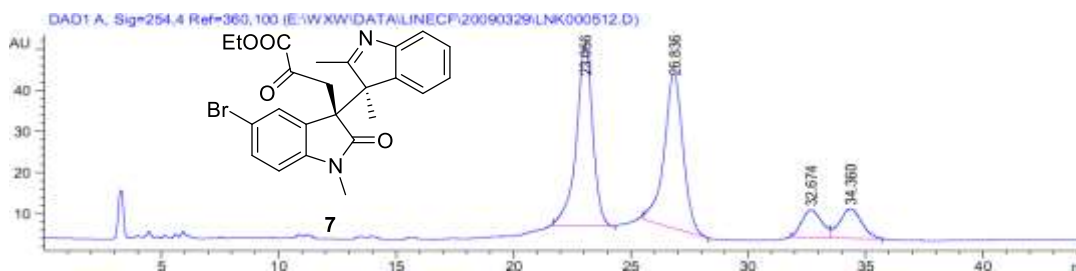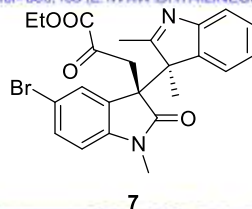



| Peak # | RetTime [min] | Type | Width [min] | Area [mAU*s] | Height [mAU] | Area %  |
|--------|---------------|------|-------------|--------------|--------------|---------|
| 1      | 23.056        | BB   | 0.7264      | 2153.54126   | 44.20094     | 41.9140 |
| 2      | 26.836        | BB   | 0.8353      | 2108.66357   | 37.77490     | 41.0406 |
| 3      | 32.674        | BV   | 0.8834      | 405.60217    | 6.74695      | 7.8942  |
| 4      | 34.360        | VB   | 0.9459      | 470.19055    | 7.21833      | 9.1512  |

**Ethyl (2'R,3R)-2'-(2-hydroxyphenyl)-1-methyl-2-oxo-2',3'-dihydrospiro [indoline-3,4'-pyran]-6'-carboxylate 9a**

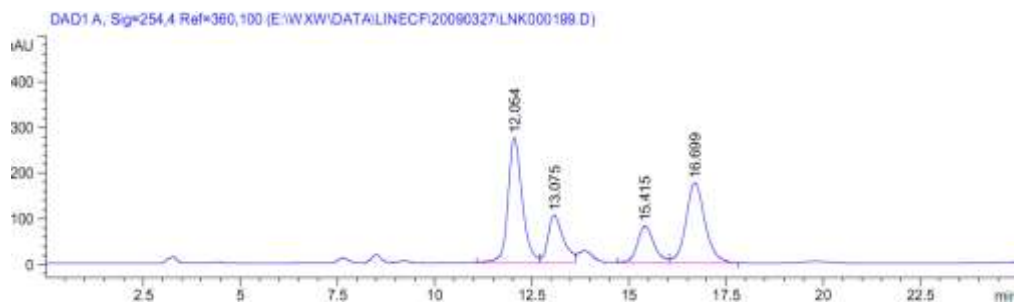

| Peak # | RetTime [min] | Type | Width [min] | Area [mAU*s] | Height [mAU] | Area %  |
|--------|---------------|------|-------------|--------------|--------------|---------|
| 1      | 12.054        | BV   | 0.3857      | 6994.57031   | 274.13824    | 38.1120 |
| 2      | 13.075        | VV   | 0.4098      | 2881.30151   | 104.46043    | 15.6996 |
| 3      | 15.415        | BV   | 0.4527      | 2444.81348   | 81.33291     | 13.3213 |
| 4      | 16.699        | VB   | 0.5202      | 6031.97900   | 175.84213    | 32.8670 |

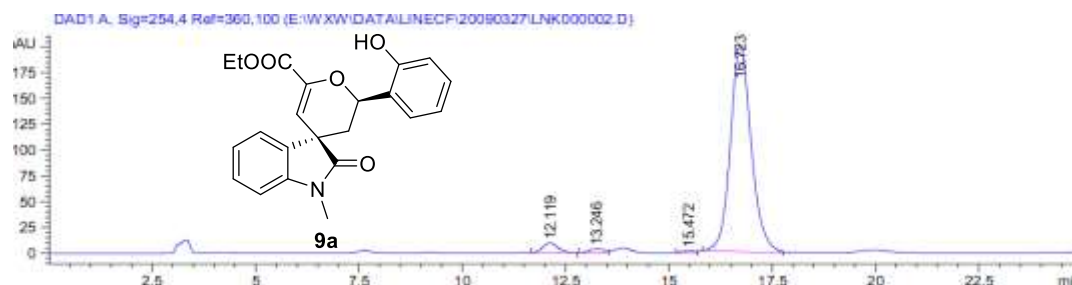

| Peak # | RetTime [min] | Type | Width [min] | Area [mAU*s] | Height [mAU] | Area %  |
|--------|---------------|------|-------------|--------------|--------------|---------|
| 1      | 12.119        | BB   | 0.3869      | 244.38368    | 9.54034      | 3.2892  |
| 2      | 13.246        | BV   | 0.3998      | 101.55199    | 3.75148      | 1.3668  |
| 3      | 15.472        | MM R | 0.4193      | 48.71481     | 1.93636      | 0.6557  |
| 4      | 16.723        | MM R | 0.5856      | 7035.20166   | 200.23108    | 94.6883 |

**Ethyl (2'R,3R)-1-allyl-2'-(2-hydroxyphenyl)-2-oxo-2',3'-dihydrospiro [indoline-3,4'-pyran]-6'-carboxylate 9b**

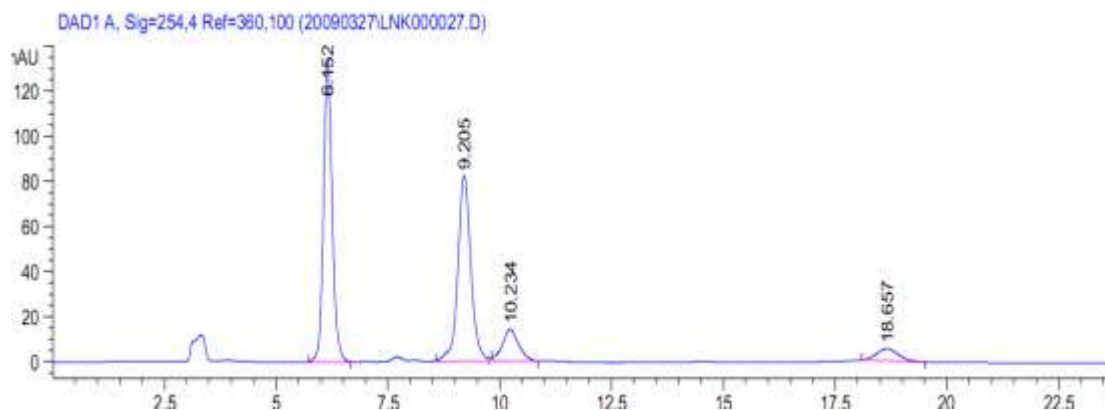

| Peak # | RetTime [min] | Type | Width [min] | Area [mAU*s] | Height [mAU] | Area %  |
|--------|---------------|------|-------------|--------------|--------------|---------|
| 1      | 6.152         | BB   | 0.2084      | 1818.82751   | 133.99493    | 45.2267 |
| 2      | 9.205         | BB   | 0.3032      | 1660.04761   | 82.34208     | 41.2785 |
| 3      | 10.234        | BB   | 0.3689      | 358.97867    | 14.10462     | 8.9263  |
| 4      | 18.657        | BB   | 0.5200      | 183.72543    | 5.33153      | 4.5685  |

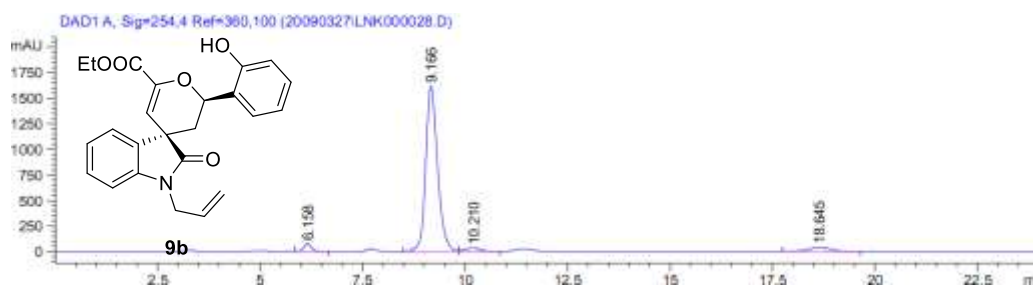

| Peak # | RetTime [min] | Type | Width [min] | Area [mAU*s] | Height [mAU] | Area %  |
|--------|---------------|------|-------------|--------------|--------------|---------|
| 1      | 6.158         | VB   | 0.2049      | 1047.68359   | 77.89876     | 2.8840  |
| 2      | 9.166         | BV   | 0.3079      | 3.27062e4    | 1617.28748   | 90.0313 |
| 3      | 10.210        | VB   | 0.3891      | 954.05750    | 36.00725     | 2.6263  |
| 4      | 18.645        | BB   | 0.5760      | 1619.64514   | 42.36364     | 4.4584  |

**Ethyl (2'*R*,3*R*)-2'-(2-hydroxyphenyl)-1-(methoxymethyl)-2-oxo-2',3'-dihydro spiro[indoline-3,4'-pyran]-6'-carboxylate 9c**

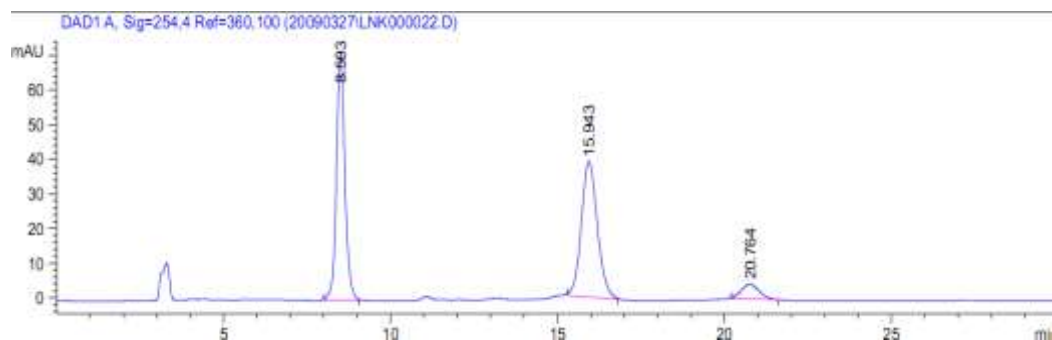

| Peak # | RetTime [min] | Type | Width [min] | Area [mAU*s] | Height [mAU] | Area %  |
|--------|---------------|------|-------------|--------------|--------------|---------|
| 1      | 8.503         | BB   | 0.2675      | 1259.61096   | 71.50252     | 46.2512 |
| 2      | 15.943        | BB   | 0.5107      | 1309.37170   | 39.30514     | 48.0784 |
| 3      | 20.764        | BB   | 0.5434      | 154.42879    | 4.19619      | 5.6704  |

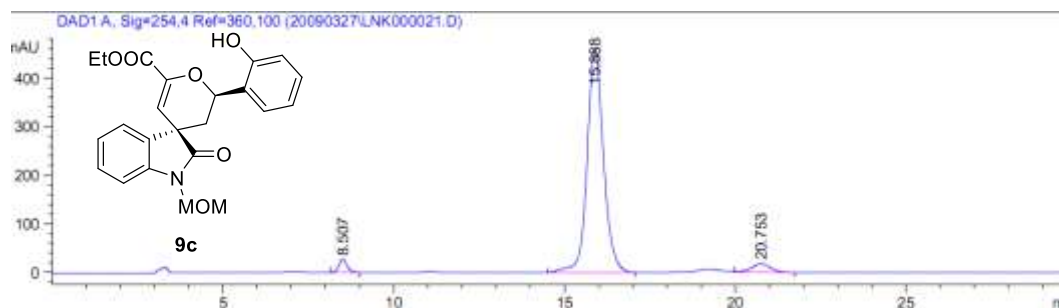

| Peak # | RetTime [min] | Type | Width [min] | Area [mAU*s] | Height [mAU] | Area %  |
|--------|---------------|------|-------------|--------------|--------------|---------|
| 1      | 8.507         | BB   | 0.2652      | 465.59503    | 26.73774     | 2.8060  |
| 2      | 15.888        | BB   | 0.5065      | 1.53972e4    | 459.97644    | 92.7937 |
| 3      | 20.753        | VB   | 0.6232      | 730.14520    | 17.62795     | 4.4003  |

**Ethyl (2'R,3R)-2'-(2-hydroxyphenyl)-1,5-dimethyl-2-oxo-2',3'-dihydro spiro[indoline-3,4'-pyran]-6'-carboxylate 9e**

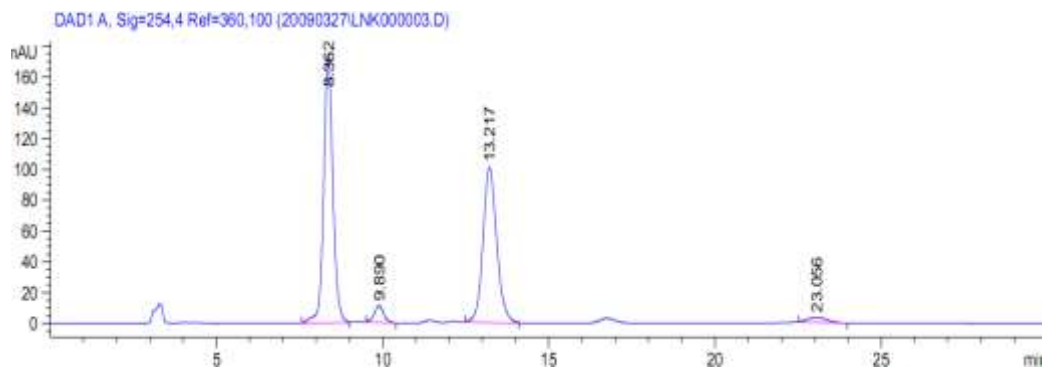

| Peak # | RetTime [min] | Type | Width [min] | Area [mAU*s] | Height [mAU] | Area %  |
|--------|---------------|------|-------------|--------------|--------------|---------|
| 1      | 8.362         | BB   | 0.2929      | 3358.79639   | 174.20824    | 50.9555 |
| 2      | 9.890         | BB   | 0.3029      | 215.57236    | 10.80069     | 3.2704  |
| 3      | 13.217        | BB   | 0.4363      | 2889.20435   | 100.83002    | 43.8314 |
| 4      | 23.056        | BB   | 0.5587      | 128.05304    | 3.27137      | 1.9427  |

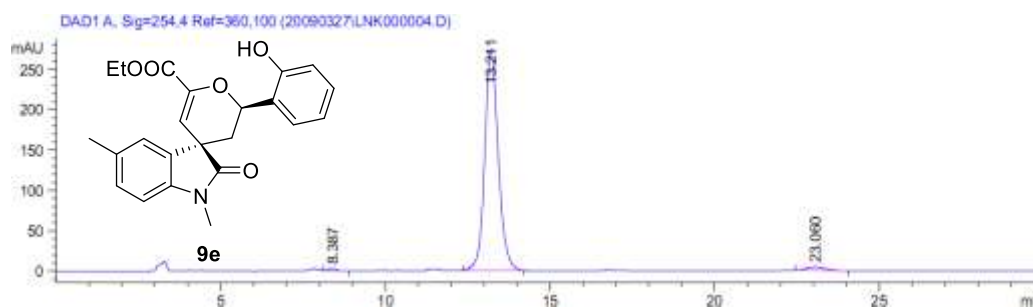

| Peak # | RetTime [min] | Type | Width [min] | Area [mAU*s] | Height [mAU] | Area %  |
|--------|---------------|------|-------------|--------------|--------------|---------|
| 1      | 8.387         | VB   | 0.2769      | 52.49780     | 2.84999      | 0.6510  |
| 2      | 13.211        | BB   | 0.4336      | 7829.94824   | 273.82190    | 97.0989 |
| 3      | 23.060        | BB   | 0.5903      | 181.44005    | 4.48233      | 2.2500  |

**Ethyl (2'R,3R)-2'-(2-hydroxyphenyl)-5-methoxy-1-methyl-2-oxo-2',3'-dihydro spiro[indoline-3,4'-pyran]-6'-carboxylate **9f****

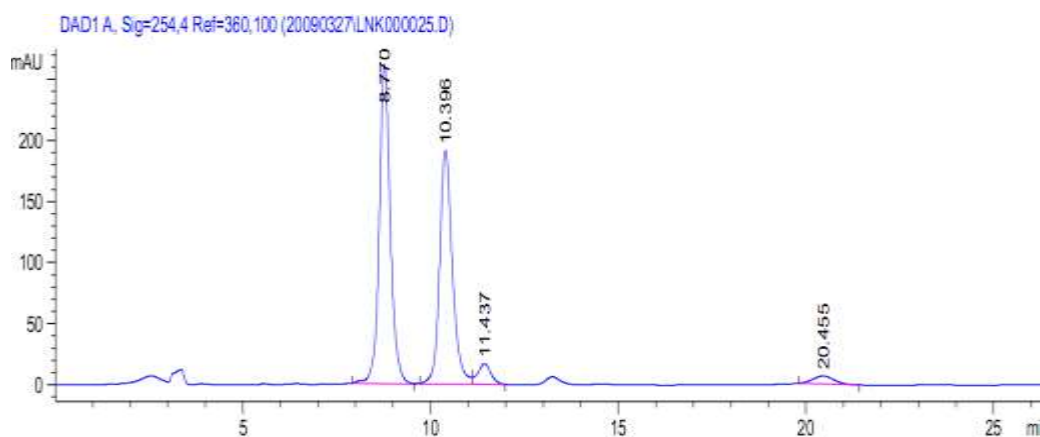

| Peak # | RetTime [min] | Type | Width [min] | Area [mAU*s] | Height [mAU] | Area %  |
|--------|---------------|------|-------------|--------------|--------------|---------|
| 1      | 8.770         | BB   | 0.3093      | 5360.87598   | 261.36469    | 50.7842 |
| 2      | 10.396        | BB   | 0.3559      | 4522.99561   | 191.22839    | 42.8469 |
| 3      | 11.437        | BB   | 0.3643      | 416.89713    | 16.98600     | 3.9493  |
| 4      | 20.455        | BB   | 0.5753      | 255.41197    | 6.63238      | 2.4195  |

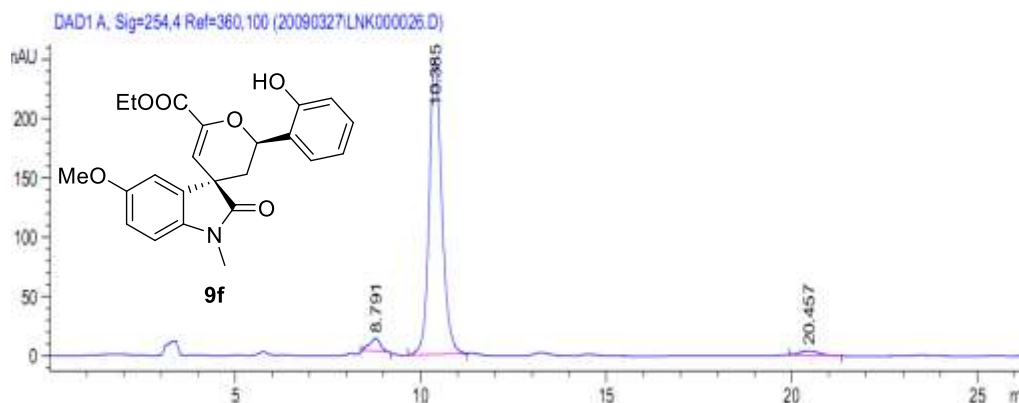

| Peak # | RetTime [min] | Type | Width [min] | Area [mAU*s] | Height [mAU] | Area %  |
|--------|---------------|------|-------------|--------------|--------------|---------|
| 1      | 8.791         | MM R | 0.3361      | 219.91698    | 10.90433     | 3.5428  |
| 2      | 10.385        | BB   | 0.3580      | 5855.68018   | 249.33177    | 94.3331 |
| 3      | 20.457        | BB   | 0.5449      | 131.85168    | 3.58689      | 2.1241  |

**Ethyl (2'R,3R)-5-fluoro-2'-(2-hydroxyphenyl)-1-methyl-2-oxo-2',3'-dihydro spiro[indoline-3,4'-pyran]-6'-carboxylate 9g**

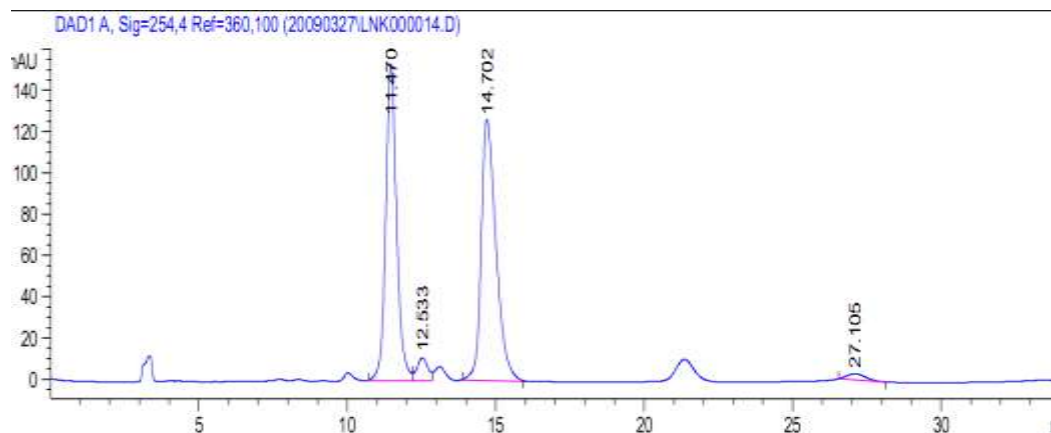

| Peak # | RetTime [min] | Type | Width [min] | Area [mAU*s] | Height [mAU] | Area %  |
|--------|---------------|------|-------------|--------------|--------------|---------|
| 1      | 11.470        | BB   | 0.3849      | 3903.25659   | 153.37061    | 44.8511 |
| 2      | 12.533        | BV   | 0.3757      | 280.07782    | 11.04964     | 3.2183  |
| 3      | 14.702        | BB   | 0.5262      | 4384.60303   | 126.56998    | 50.3821 |
| 4      | 27.105        | BB   | 0.6131      | 134.76987    | 3.05261      | 1.5486  |

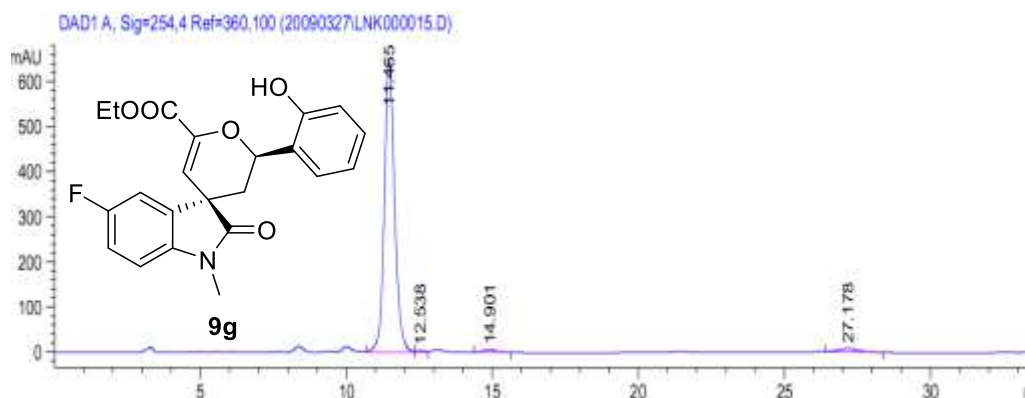

| Peak # | RetTime [min] | Type | Width [min] | Area [mAU*s] | Height [mAU] | Area %  |
|--------|---------------|------|-------------|--------------|--------------|---------|
| 1      | 11.465        | BB   | 0.3703      | 1.58331e4    | 649.73273    | 96.1774 |
| 2      | 12.538        | BV   | 0.3308      | 82.17564     | 3.67639      | 0.4992  |
| 3      | 14.901        | BB   | 0.4673      | 185.98126    | 6.03924      | 1.1297  |
| 4      | 27.178        | BB   | 0.7279      | 361.12943    | 7.21533      | 2.1937  |

**Ethyl (2'R,3R)-5-chloro-2'-(2-hydroxyphenyl)-1-methyl-2-oxo-2',3'-dihydro spiro[indoline-3,4'-pyran]-6'-carboxylate 9h**

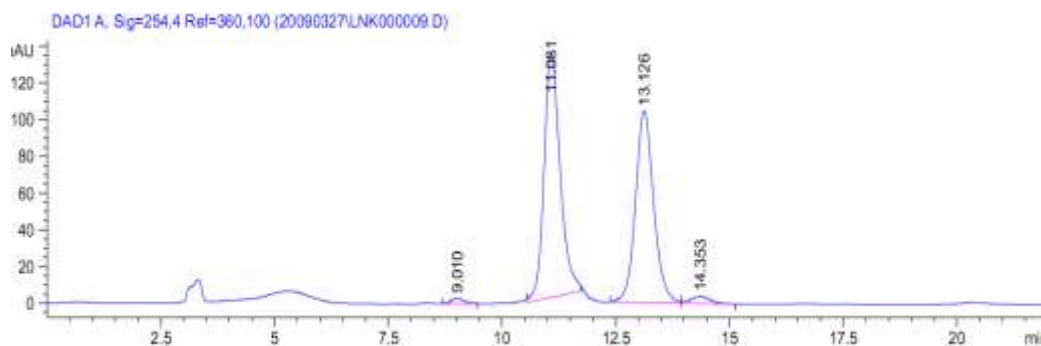

| Peak # | RetTime [min] | Type | Width [min] | Area [mAU*s] | Height [mAU] | Area %  |
|--------|---------------|------|-------------|--------------|--------------|---------|
| 1      | 9.010         | BB   | 0.2873      | 53.55437     | 2.82286      | 0.8422  |
| 2      | 11.081        | MM R | 0.4094      | 3274.27563   | 133.29955    | 51.4922 |
| 3      | 13.126        | BB   | 0.4253      | 2916.85889   | 104.62659    | 45.8714 |
| 4      | 14.353        | BB   | 0.4425      | 114.08827    | 3.84095      | 1.7942  |

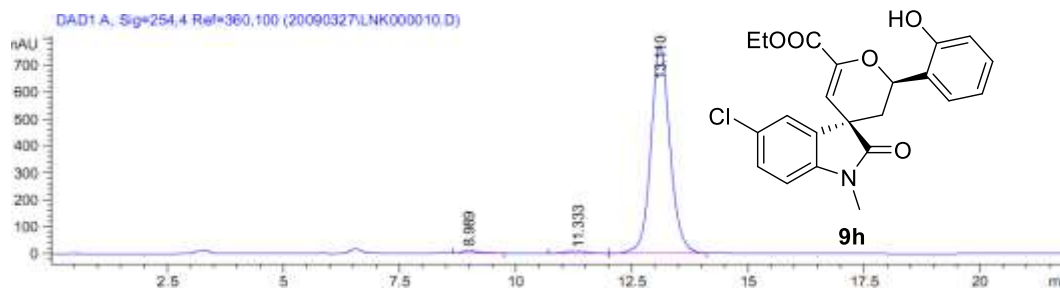

| Peak # | RetTime [min] | Type | Width [min] | Area [mAU*s] | Height [mAU] | Area %  |
|--------|---------------|------|-------------|--------------|--------------|---------|
| 1      | 8.989         | BB   | 0.3401      | 261.27390    | 11.04163     | 1.1678  |
| 2      | 11.333        | BV   | 0.4902      | 241.12262    | 6.69437      | 1.0778  |
| 3      | 13.110        | VB   | 0.4335      | 2.18698e4    | 769.71008    | 97.7544 |

**Ethyl (2'*R*,3*R*)-5-bromo-2'-(2-hydroxyphenyl)-1-methyl-2-oxo-2',3'-dihydro spiro[indoline-3,4'-pyran]-6'-carboxylate 9i**

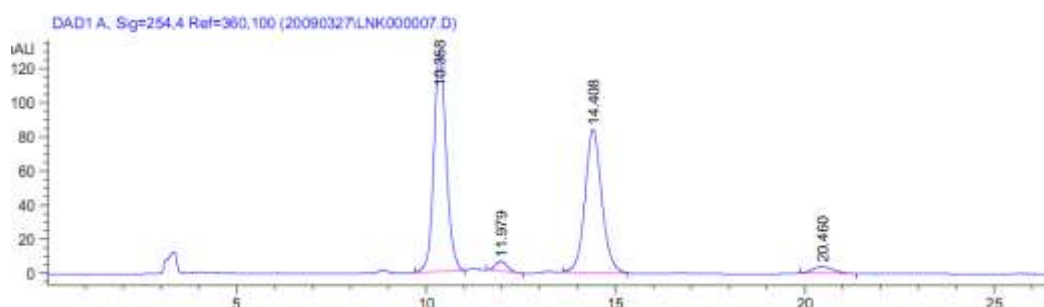

| Peak # | RetTime [min] | Type | Width [min] | Area [mAU*s] | Height [mAU] | Area %  |
|--------|---------------|------|-------------|--------------|--------------|---------|
| 1      | 10.358        | BB   | 0.3448      | 2913.79297   | 129.36554    | 50.3975 |
| 2      | 11.979        | BB   | 0.3405      | 128.84715    | 5.81618      | 2.2286  |
| 3      | 14.408        | BB   | 0.4671      | 2589.68457   | 84.14172     | 44.7917 |
| 4      | 20.460        | BB   | 0.5684      | 149.29741    | 3.86732      | 2.5823  |

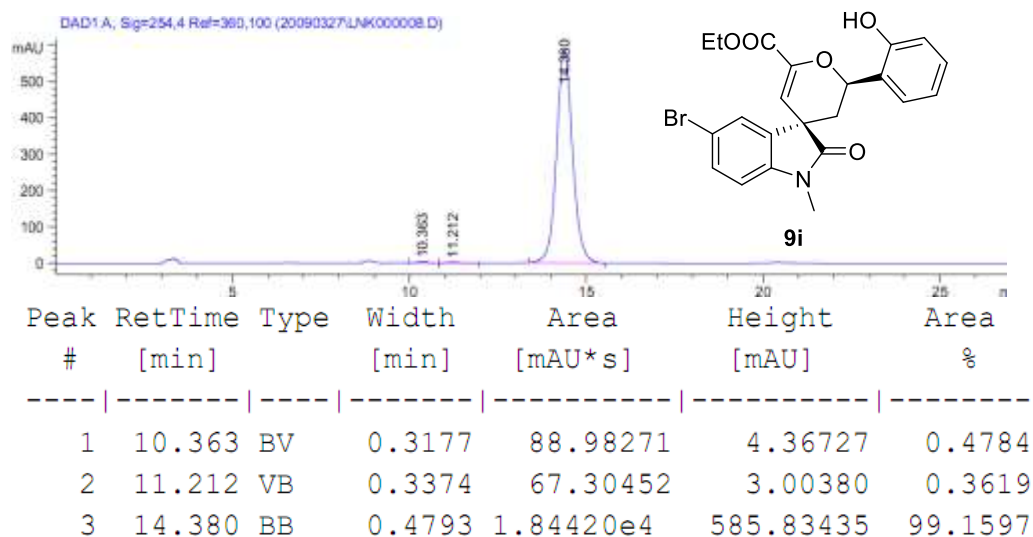

**Ethyl (2'R,3R)-6-chloro-2'-(2-hydroxyphenyl)-1-methyl-2-oxo-2',3'-dihydro spiro[indoline-3,4'-pyran]-6'-carboxylate **9j****

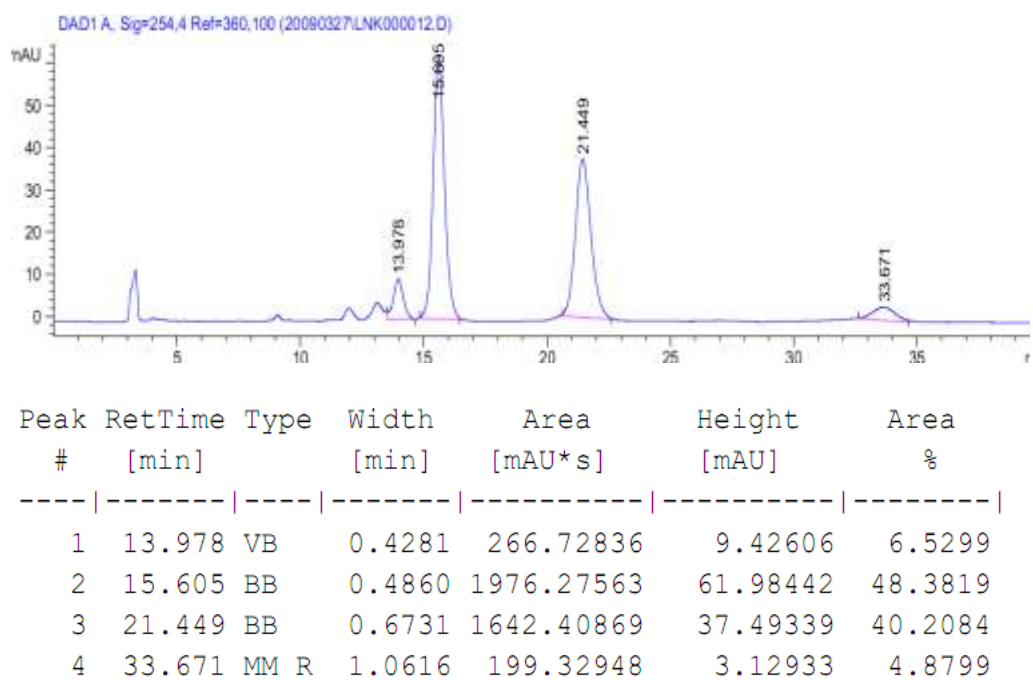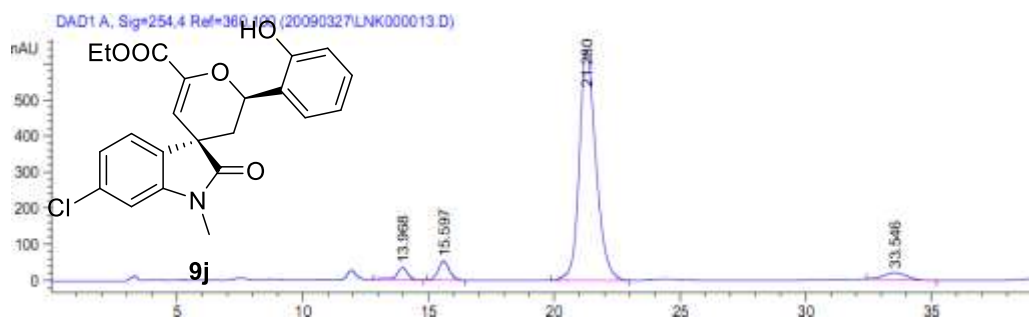



| Peak # | RetTime [min] | Type | Width [min] | Area [mAU*s] | Height [mAU] | Area %  |
|--------|---------------|------|-------------|--------------|--------------|---------|
| 1      | 13.968        | BB   | 0.4610      | 1070.91882   | 34.22635     | 3.2048  |
| 2      | 15.597        | BB   | 0.4860      | 1662.04651   | 52.40936     | 4.9738  |
| 3      | 21.280        | BB   | 0.7027      | 2.94381e4    | 637.58710    | 88.0959 |
| 4      | 33.546        | BB   | 0.9795      | 1244.88574   | 19.37881     | 3.7254  |

**Ethyl (2'R,3R)-2'-(2-hydroxyphenyl)-1,7-dimethyl-2-oxo-2',3'-dihydro spiro[indoline-3,4'-pyran]-6'-carboxylate 9k**

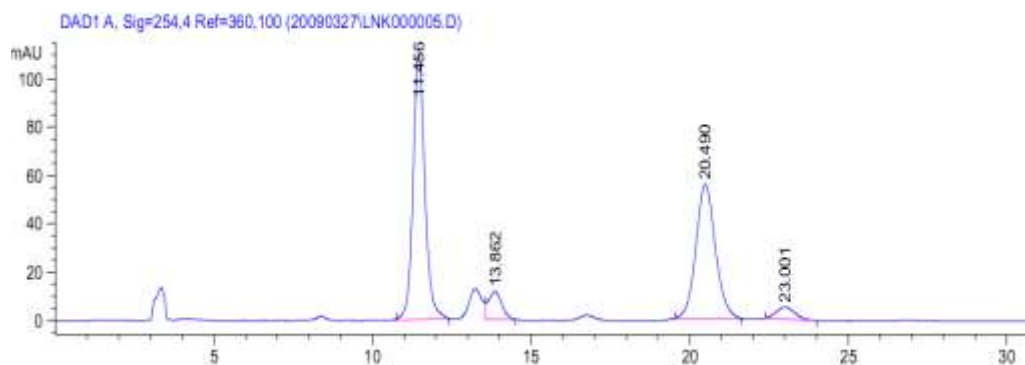

| Peak # | RetTime [min] | Type | Width [min] | Area [mAU*s] | Height [mAU] | Area %  |
|--------|---------------|------|-------------|--------------|--------------|---------|
| 1      | 11.456        | BB   | 0.3925      | 2839.08179   | 109.48750    | 49.0800 |
| 2      | 13.862        | VB   | 0.4425      | 343.74103    | 11.50884     | 5.9424  |
| 3      | 20.490        | BB   | 0.6581      | 2400.12427   | 55.76483     | 41.4917 |
| 4      | 23.001        | BB   | 0.6050      | 201.64821    | 4.93243      | 3.4860  |

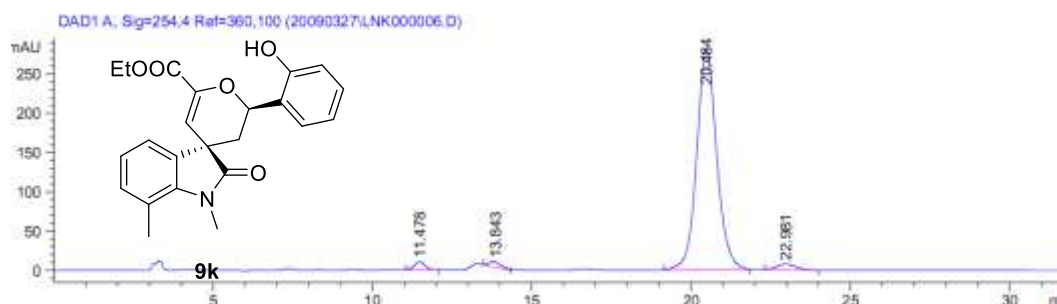

| Peak # | RetTime [min] | Type | Width [min] | Area [mAU*s] | Height [mAU] | Area %  |
|--------|---------------|------|-------------|--------------|--------------|---------|
| 1      | 11.478        | BB   | 0.3561      | 234.82748    | 10.21978     | 1.8093  |
| 2      | 13.843        | MM R | 0.4706      | 194.80270    | 6.89891      | 1.5009  |
| 3      | 20.484        | BB   | 0.6645      | 1.22637e4    | 281.37967    | 94.4878 |
| 4      | 22.981        | BB   | 0.6032      | 285.80978    | 6.92953      | 2.2021  |

Et

**ethyl (2'R,3R)-7-fluoro-2'-(2-hydroxyphenyl)-1-methyl-2-oxo-2',3'-dihydro spiro[indoline-3,4'-pyran]-6'-carboxylate 9l**

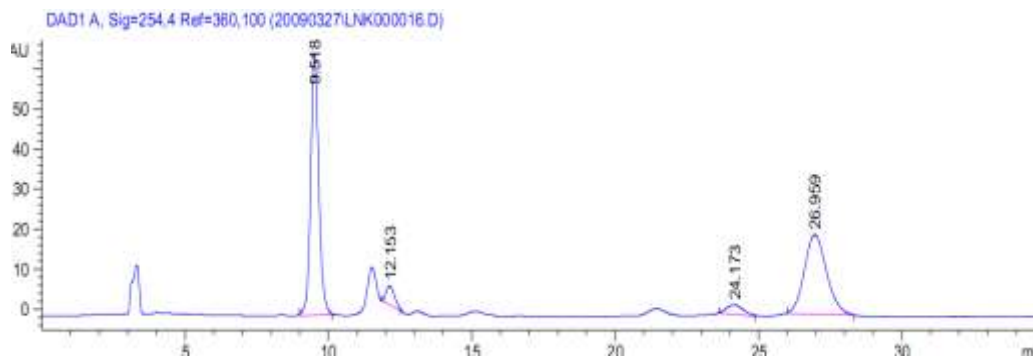

| Peak # | RetTime [min] | Type | Width [min] | Area [mAU*s] | Height [mAU] | Area %  |
|--------|---------------|------|-------------|--------------|--------------|---------|
| 1      | 9.518         | BB   | 0.2965      | 1282.92688   | 65.49512     | 50.3692 |
| 2      | 12.153        | MM R | 0.3382      | 97.38918     | 4.79935      | 3.8236  |
| 3      | 24.173        | MM R | 0.6773      | 96.86373     | 2.38354      | 3.8030  |
| 4      | 26.959        | BB   | 0.7999      | 1069.86816   | 19.87949     | 42.0042 |

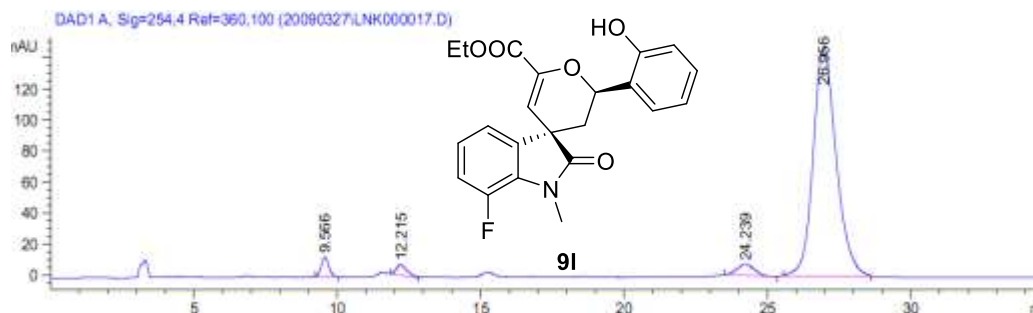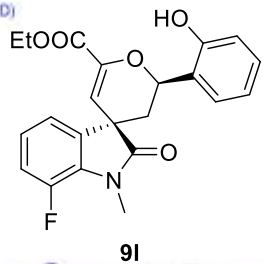

| Peak # | RetTime [min] | Type | Width [min] | Area [mAU*s] | Height [mAU] | Area %  |
|--------|---------------|------|-------------|--------------|--------------|---------|
| 1      | 9.566         | BB   | 0.2837      | 234.28789    | 12.67134     | 2.6138  |
| 2      | 12.215        | MM R | 0.4595      | 192.02715    | 6.96575      | 2.1423  |
| 3      | 24.239        | BB   | 0.6411      | 302.46597    | 7.21517      | 3.3744  |
| 4      | 26.956        | BB   | 0.8500      | 8234.75586   | 146.89319    | 91.8695 |

**Ethyl (2R,3R)-2'-(2-hydroxy-5-methylphenyl)-1-methyl-2-oxo-2',3'-dihydro spiro[indoline-3,4'-pyran]-6'-carboxylate 9m**

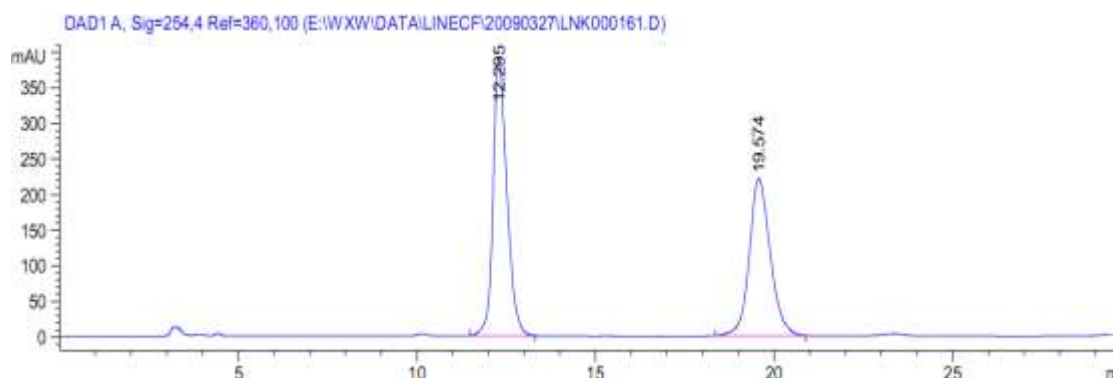

| Peak # | RetTime [min] | Type | Width [min] | Area [mAU*s] | Height [mAU] | Area %  |
|--------|---------------|------|-------------|--------------|--------------|---------|
| 1      | 12.295        | BB   | 0.4082      | 1.04853e4    | 389.35651    | 53.6746 |
| 2      | 19.574        | BB   | 0.6221      | 9049.68359   | 220.81812    | 46.3254 |

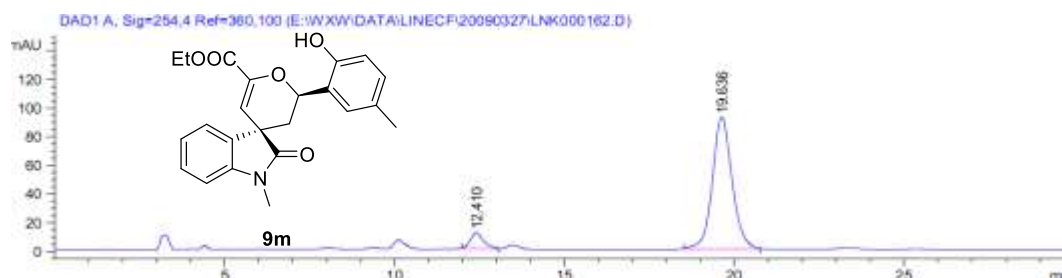

| Peak # | RetTime [min] | Type | Width [min] | Area [mAU*s] | Height [mAU] | Area %  |
|--------|---------------|------|-------------|--------------|--------------|---------|
| 1      | 12.410        | BB   | 0.4009      | 298.65817    | 11.13603     | 7.4253  |
| 2      | 19.636        | BB   | 0.6134      | 3723.53076   | 92.15330     | 92.5747 |

**Ethyl (2'R,3R)-2'-(5-(tert-butyl)-2-hydroxyphenyl)-1-methyl-2-oxo-2',3'-dihydro spiro[indoline-3,4'-pyran]-6'-carboxylate **9n****

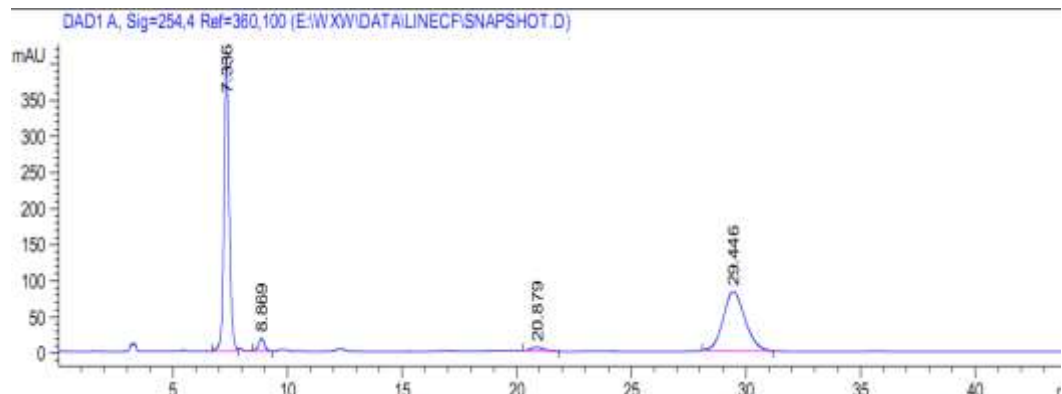

| Peak # | RetTime [min] | Type | Width [min] | Area [mAU*s] | Height [mAU] | Area %  |
|--------|---------------|------|-------------|--------------|--------------|---------|
| 1      | 7.336         | BV   | 0.2417      | 6457.59863   | 405.61664    | 52.0472 |
| 2      | 8.869         | BB   | 0.2673      | 311.94751    | 17.55669     | 2.5142  |
| 3      | 20.879        | BB   | 0.5812      | 198.05103    | 5.16645      | 1.5963  |
| 4      | 29.446        | BB   | 1.0152      | 5439.60303   | 81.86147     | 43.8423 |

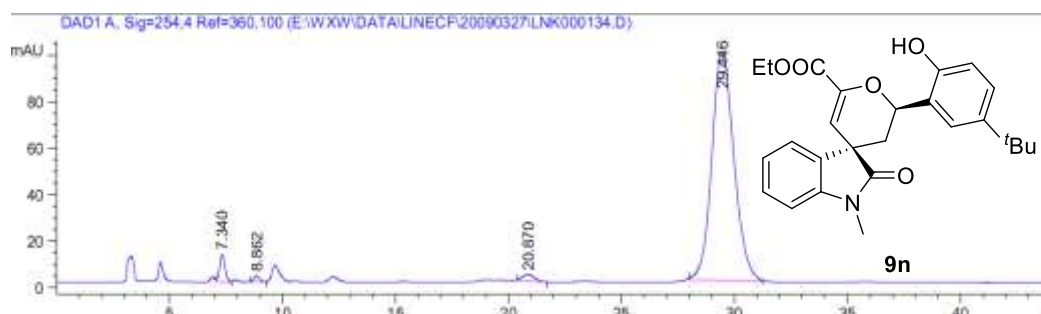

| Peak # | RetTime [min] | Type | Width [min] | Area [mAU*s] | Height [mAU] | Area %  |
|--------|---------------|------|-------------|--------------|--------------|---------|
| 1      | 7.340         | VB   | 0.2556      | 198.64308    | 11.84856     | 2.8362  |
| 2      | 8.862         | BB   | 0.2588      | 43.20865     | 2.58841      | 0.6169  |
| 3      | 20.870        | BB   | 0.5196      | 95.81676     | 2.68979      | 1.3680  |
| 4      | 29.446        | BB   | 1.0377      | 6666.28516   | 98.23561     | 95.1789 |

**Ethyl (2'R,3R)-2'-(5-chloro-2-hydroxyphenyl)-1-methyl-2-oxo-2',3'-dihydro spiro[indoline-3,4'-pyran]-6'-carboxylate **9o****

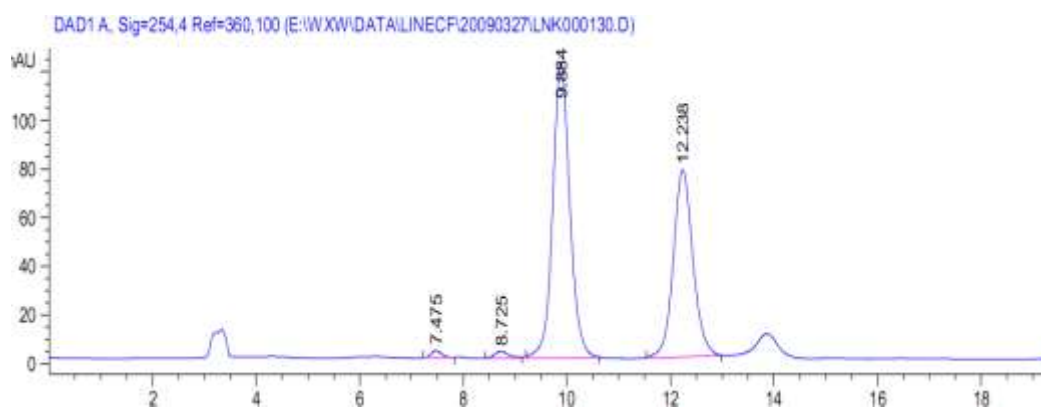

| Peak # | RetTime [min] | Type | Width [min] | Area [mAU*s] | Height [mAU] | Area %  |
|--------|---------------|------|-------------|--------------|--------------|---------|
| 1      | 7.475         | BB   | 0.2081      | 39.82860     | 2.90324      | 0.8135  |
| 2      | 8.725         | BB   | 0.2742      | 52.83976     | 2.90475      | 1.0792  |
| 3      | 9.884         | BB   | 0.3496      | 2779.27563   | 121.16463    | 56.7645 |
| 4      | 12.238        | BB   | 0.4015      | 2024.20886   | 76.79546     | 41.3428 |

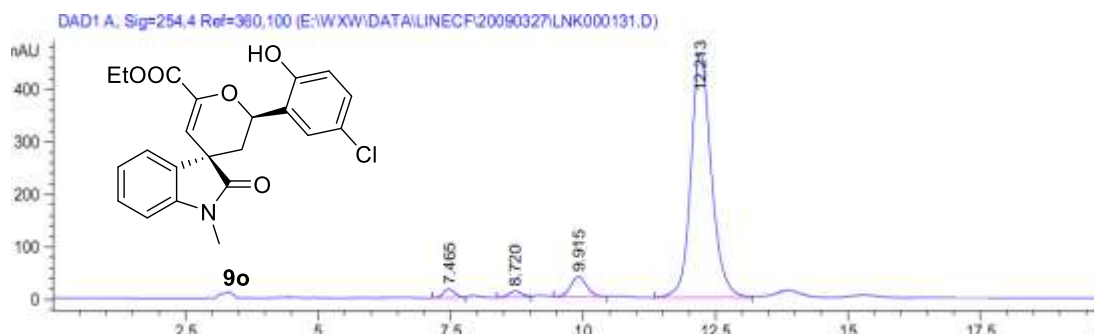

| Peak # | RetTime [min] | Type | Width [min] | Area [mAU*s] | Height [mAU] | Area %  |
|--------|---------------|------|-------------|--------------|--------------|---------|
| 1      | 7.465         | BV   | 0.2254      | 246.26666    | 16.57381     | 1.7920  |
| 2      | 8.720         | BV   | 0.2681      | 206.30502    | 11.68094     | 1.5012  |
| 3      | 9.915         | VB   | 0.3212      | 794.76880    | 38.13157     | 5.7833  |
| 4      | 12.213        | BB   | 0.4068      | 1.24952e4    | 466.11136    | 90.9235 |

**Ethyl (2'R,3R)-2'-(2-hydroxy-4-methylphenyl)-1-methyl-2-oxo-2',3'-dihydro spiro[indoline-3,4'-pyran]-6'-carboxylate 9p**

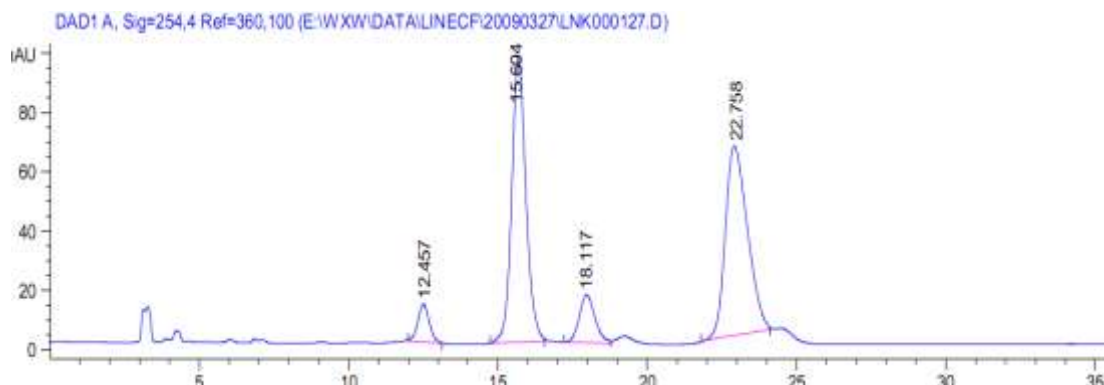

| Peak # | RetTime [min] | Type | Width [min] | Area [mAU*s] | Height [mAU] | Area %  |
|--------|---------------|------|-------------|--------------|--------------|---------|
| 1      | 12.457        | BB   | 0.3969      | 332.80569    | 12.73566     | 4.5242  |
| 2      | 15.604        | BB   | 0.4980      | 3145.75928   | 96.07786     | 42.7639 |
| 3      | 18.117        | BB   | 0.5511      | 581.86841    | 16.04621     | 7.9100  |
| 4      | 22.758        | BB   | 0.7897      | 3295.68457   | 64.11639     | 44.8020 |

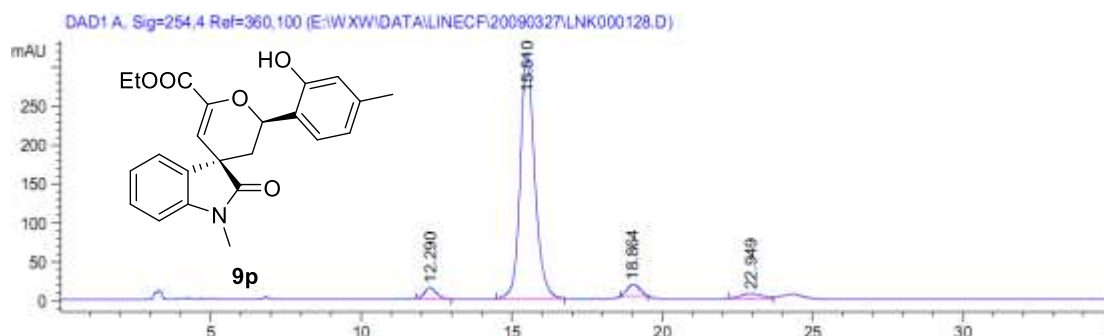

| Peak # | RetTime [min] | Type | Width [min] | Area [mAU*s] | Height [mAU] | Area %  |
|--------|---------------|------|-------------|--------------|--------------|---------|
| 1      | 12.290        | BB   | 0.4109      | 393.19601    | 14.56518     | 3.3650  |
| 2      | 15.510        | BB   | 0.5046      | 1.05314e4    | 316.15125    | 90.1290 |
| 3      | 18.864        | MM R | 0.4791      | 429.66769    | 14.94637     | 3.6771  |
| 4      | 22.949        | BV   | 0.7609      | 330.55057    | 6.57035      | 2.8289  |

**Ethyl (2'R,3R)-2'-(2-hydroxy-4-methoxyphenyl)-1-methyl-2-oxo-2',3'-dihydro spiro[indoline-3,4'-pyran]-6'-carboxylate 9q**

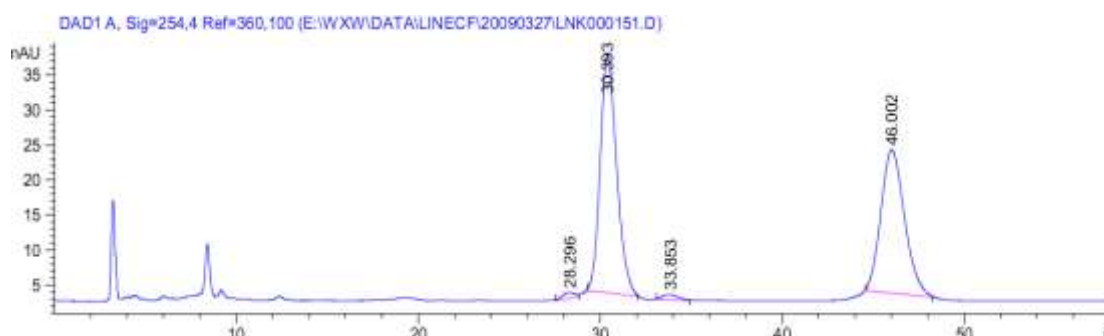

| Peak # | RetTime [min] | Type | Width [min] | Area [mAU*s] | Height [mAU] | Area %  |
|--------|---------------|------|-------------|--------------|--------------|---------|
| 1      | 28.296        | MM R | 0.7999      | 39.79426     | 8.29152e-1   | 0.9794  |
| 2      | 30.393        | BB   | 0.9513      | 2134.70874   | 33.96127     | 52.5373 |
| 3      | 33.853        | MM R | 1.0208      | 46.74310     | 7.63208e-1   | 1.1504  |
| 4      | 46.002        | BB   | 1.2882      | 1841.97571   | 20.42399     | 45.3329 |

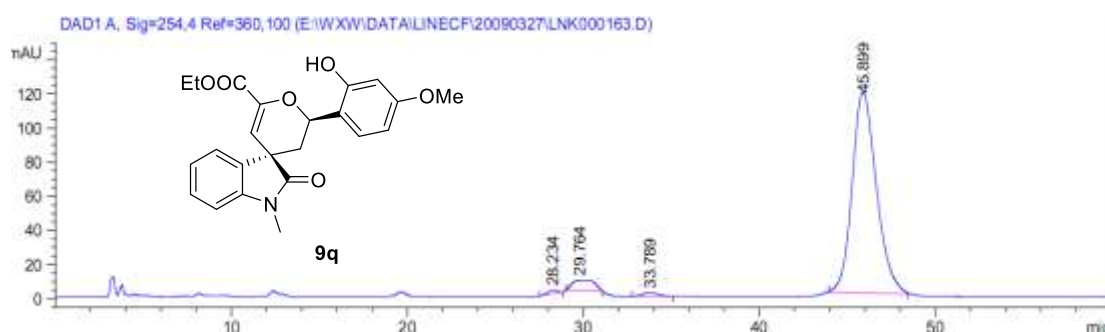

| Peak # | RetTime [min] | Type | Width [min] | Area [mAU*s] | Height [mAU] | Area %  |
|--------|---------------|------|-------------|--------------|--------------|---------|
| 1      | 28.234        | MM R | 0.6104      | 73.82506     | 2.01578      | 0.6126  |
| 2      | 29.764        | MM R | 1.4604      | 524.72772    | 5.98821      | 4.3542  |
| 3      | 33.789        | MM R | 1.0402      | 139.70941    | 2.23847      | 1.1593  |
| 4      | 45.899        | BB   | 1.4069      | 1.13128e4    | 117.75182    | 93.8739 |

**Ethyl (2'*R*,3'*R*)-2'-(2-hydroxy-3-methoxyphenyl)-1-methyl-2-oxo-2',3'-dihydro spiro[indoline-3,4'-pyran]-6'-carboxylate **9r****

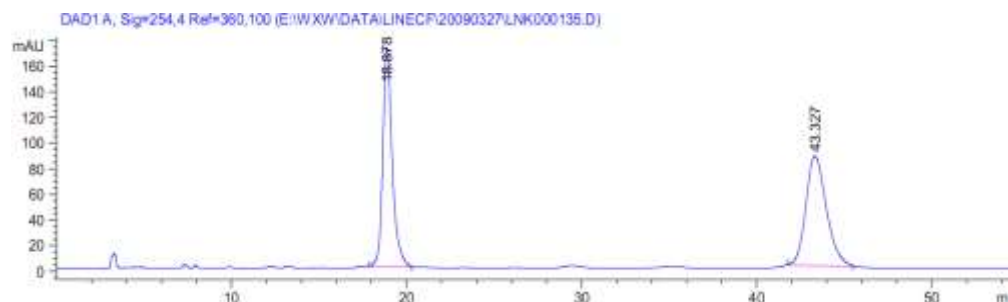

| Peak # | RetTime [min] | Type | Width [min] | Area [mAU*s] | Height [mAU] | Area %  |
|--------|---------------|------|-------------|--------------|--------------|---------|
| 1      | 18.878        | BB   | 0.5605      | 6400.74854   | 171.08636    | 47.8155 |
| 2      | 43.327        | BB   | 1.2481      | 6985.60156   | 85.77898     | 52.1845 |

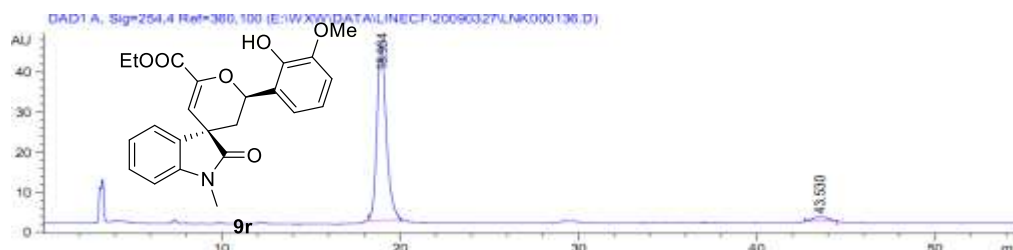

| Peak # | RetTime [min] | Type | Width [min] | Area [mAU*s] | Height [mAU] | Area %  |
|--------|---------------|------|-------------|--------------|--------------|---------|
| 1      | 18.934        | BB   | 0.5405      | 1602.65662   | 44.46686     | 95.9846 |
| 2      | 43.530        | MM R | 1.0169      | 67.04601     | 1.09884      | 4.0154  |

**Ethyl (2'*R*,3'*R*)-2'-(2-hydroxy-3-methylphenyl)-1-methyl-2-oxo-2',3'-dihydro spiro[indoline-3,4'-pyran]-6'-carboxylate **9s****

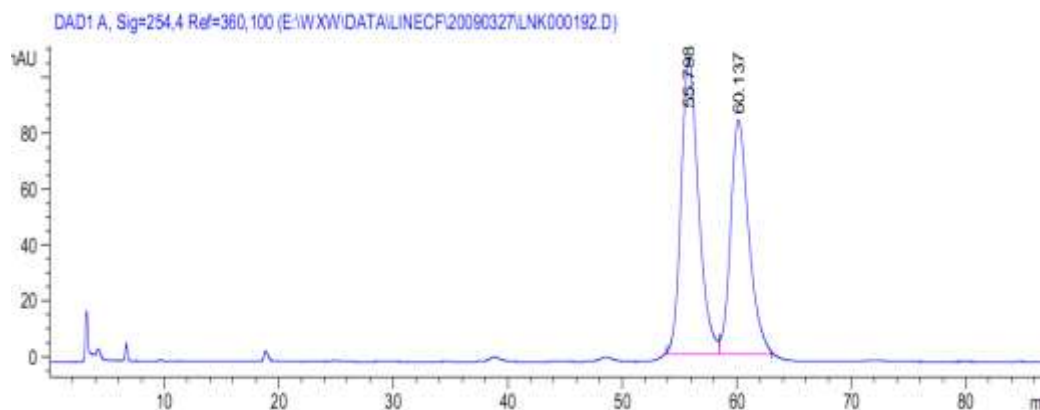

| Peak # | RetTime [min] | Type | Width [min] | Area [mAU*s] | Height [mAU] | Area %  |
|--------|---------------|------|-------------|--------------|--------------|---------|
| 1      | 55.798        | BB   | 1.5966      | 1.11205e4    | 105.08260    | 54.7737 |
| 2      | 60.137        | BB   | 1.6472      | 9182.09668   | 83.61021     | 45.2263 |

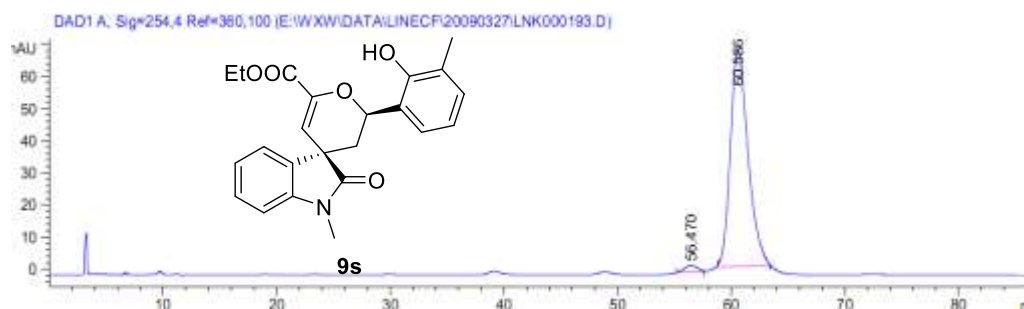

| Peak # | RetTime [min] | Type | Width [min] | Area [mAU*s] | Height [mAU] | Area %  |
|--------|---------------|------|-------------|--------------|--------------|---------|
| 1      | 56.470        | MM R | 1.3332      | 164.96535    | 2.06224      | 2.2216  |
| 2      | 60.586        | BB   | 1.5703      | 7260.64551   | 67.42653     | 97.7784 |

**Ethyl (2'R,3R)-2'-(2-hydroxyphenyl)-1,3'-dimethyl-2-oxo-2',3'-dihydrospiro [indoline-3,4'-pyran]-6'-carboxylate 9t**

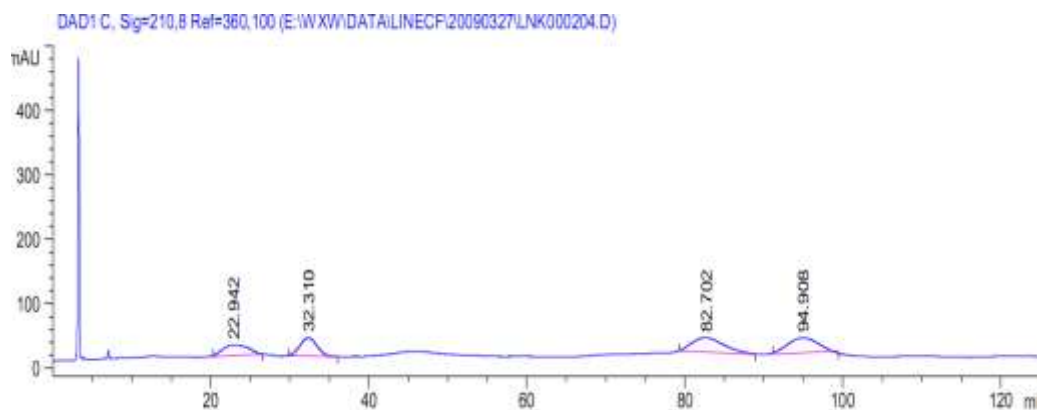

| Peak # | RetTime [min] | Type | Width [min] | Area [mAU*s] | Height [mAU] | Area %  |
|--------|---------------|------|-------------|--------------|--------------|---------|
| 1      | 22.942        | MM R | 3.7737      | 3722.04639   | 16.43859     | 18.4693 |
| 2      | 32.310        | BB   | 1.8104      | 4200.38867   | 28.32001     | 20.8429 |
| 3      | 82.702        | BB   | 3.2406      | 6195.11475   | 22.38603     | 30.7409 |
| 4      | 94.908        | MM R | 3.0921      | 6035.09912   | 22.89668     | 29.9469 |



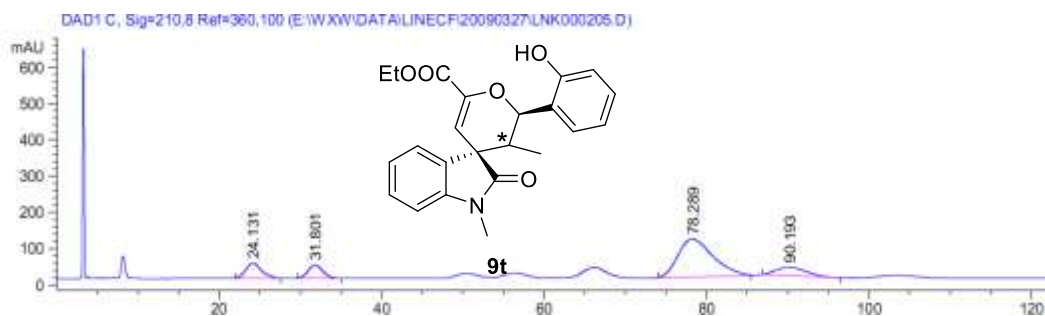

| Peak # | RetTime [min] | Type | Width [min] | Area [mAU*s] | Height [mAU] | Area %  |
|--------|---------------|------|-------------|--------------|--------------|---------|
| 1      | 24.131        | BB   | 1.8916      | 5644.10645   | 41.84425     | 11.7802 |
| 2      | 31.801        | BB   | 1.6667      | 4558.94434   | 36.41339     | 9.5153  |
| 3      | 78.289        | MM R | 5.0233      | 3.16312e4    | 104.94801    | 66.0196 |
| 4      | 90.193        | BB   | 3.0510      | 6077.58154   | 23.42393     | 12.6849 |

**Ethyl-(S,E)-3-(3-(2-(2-hydroxyphenyl)prop-1-en-1-yl)-1-methyl-2-oxindolin-3-yl)-2-oxopropanoate **9v****

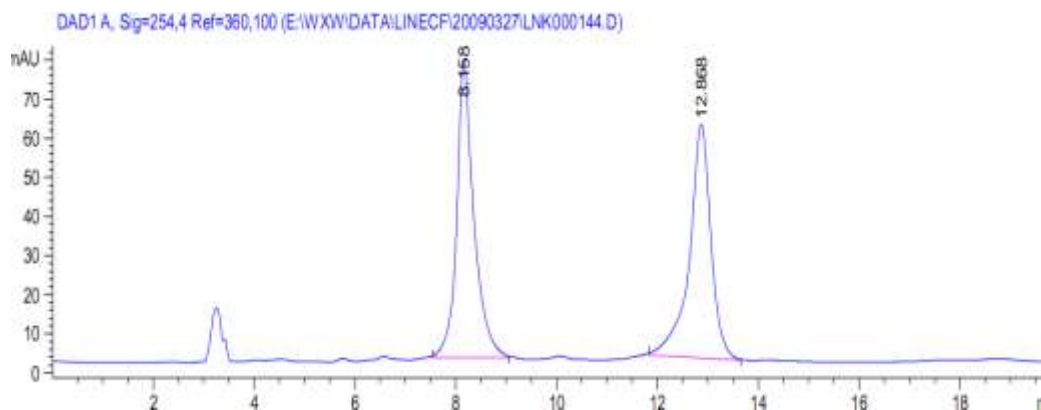

| Peak # | RetTime [min] | Type | Width [min] | Area [mAU*s] | Height [mAU] | Area %  |
|--------|---------------|------|-------------|--------------|--------------|---------|
| 1      | 8.158         | BB   | 0.3313      | 1790.37341   | 75.86448     | 50.2115 |
| 2      | 12.868        | BB   | 0.4307      | 1775.29358   | 59.73475     | 49.7885 |

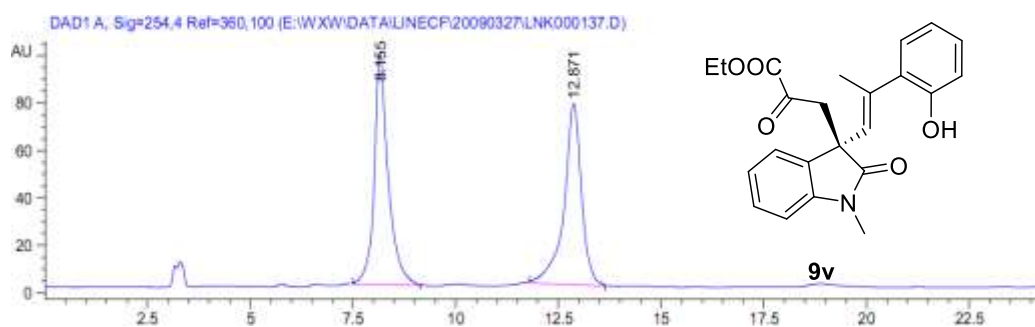

| Peak # | RetTime [min] | Type | Width [min] | Area [mAU*s] | Height [mAU] | Area %  |
|--------|---------------|------|-------------|--------------|--------------|---------|
| 1      | 8.155         | BB   | 0.3297      | 2291.95093   | 97.70203     | 50.4314 |
| 2      | 12.871        | BB   | 0.4282      | 2252.74219   | 76.35545     | 49.5686 |

**Ethyl-(*S,E*)-3-(3-(2-(2-hydroxyphenyl)-2-phenylvinyl)-1-methyl-2-oxindolin-3-yl)-2-oxopropanoate 9w**

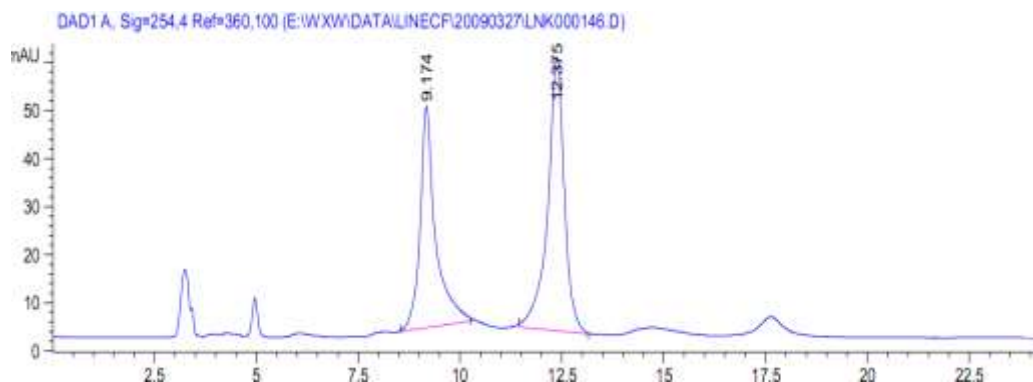

| Peak # | RetTime [min] | Type | Width [min] | Area [mAU*s] | Height [mAU] | Area %  |
|--------|---------------|------|-------------|--------------|--------------|---------|
| 1      | 9.174         | BB   | 0.3702      | 1223.53979   | 46.01573     | 43.0388 |
| 2      | 12.375        | BB   | 0.4142      | 1619.33545   | 56.87083     | 56.9612 |

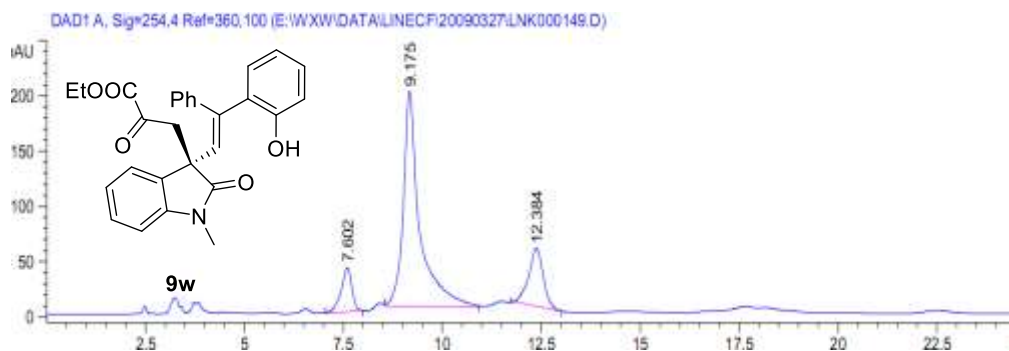

| Peak # | RetTime [min] | Type | Width [min] | Area [mAU*s] | Height [mAU] | Area %  |
|--------|---------------|------|-------------|--------------|--------------|---------|
| 1      | 7.602         | MM R | 0.3192      | 767.70575    | 40.08863     | 9.9137  |
| 2      | 9.175         | MM R | 0.4821      | 5630.79736   | 194.67307    | 72.7125 |
| 3      | 12.384        | MM R | 0.4291      | 1345.41528   | 52.26243     | 17.3738 |

**(2'*R*,3*R*)-2'-(2-Hydroxyphenyl)-*N*,1-dimethyl-2-oxo-2',3'-dihydrospiro[indoline-3,4'-pyran]-6'-carboxamide 12a**

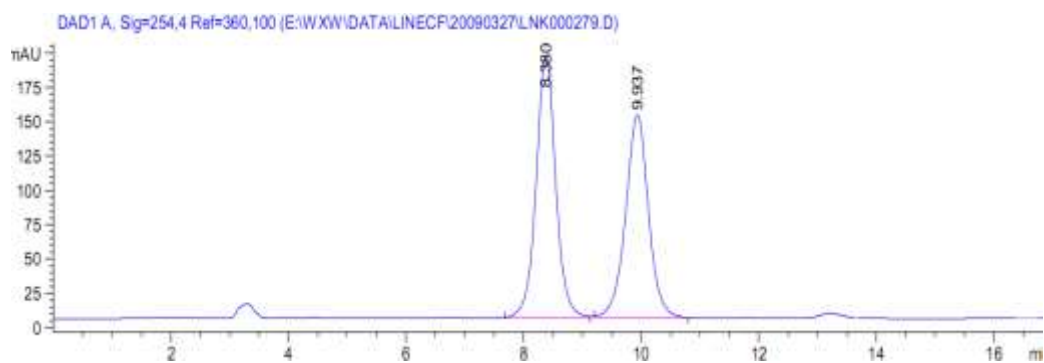

| Peak # | RetTime [min] | Type | Width [min] | Area [mAU*s] | Height [mAU] | Area %  |
|--------|---------------|------|-------------|--------------|--------------|---------|
| 1      | 8.380         | BB   | 0.3563      | 4448.54346   | 190.59363    | 52.4965 |
| 2      | 9.937         | BB   | 0.4117      | 4025.44092   | 147.83041    | 47.5035 |

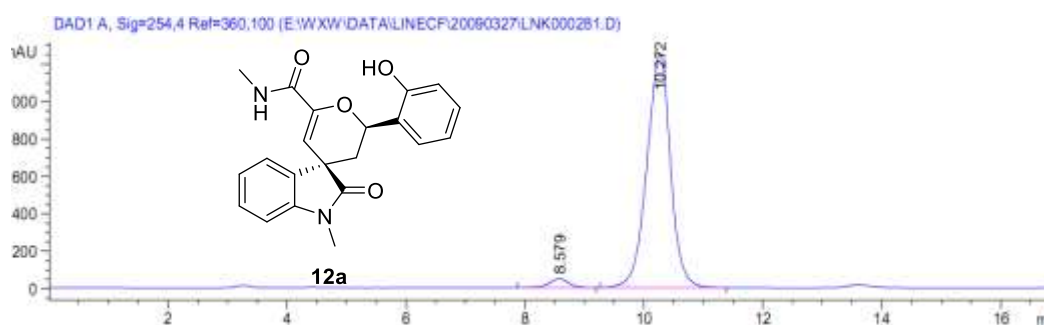

| Peak # | RetTime [min] | Type | Width [min] | Area [mAU*s] | Height [mAU] | Area %  |
|--------|---------------|------|-------------|--------------|--------------|---------|
| 1      | 8.579         | BB   | 0.3603      | 1143.31653   | 48.27978     | 3.1905  |
| 2      | 10.272        | BB   | 0.4251      | 3.46917e4    | 1252.48169   | 96.8095 |

**(2'R,3R)-5-Bromo-2'-(2-hydroxyphenyl)-N,1-dimethyl-2-oxo-2',3'-dihydrospiro [indoline-3,4'-pyran]-6'-carboxamide 12b**

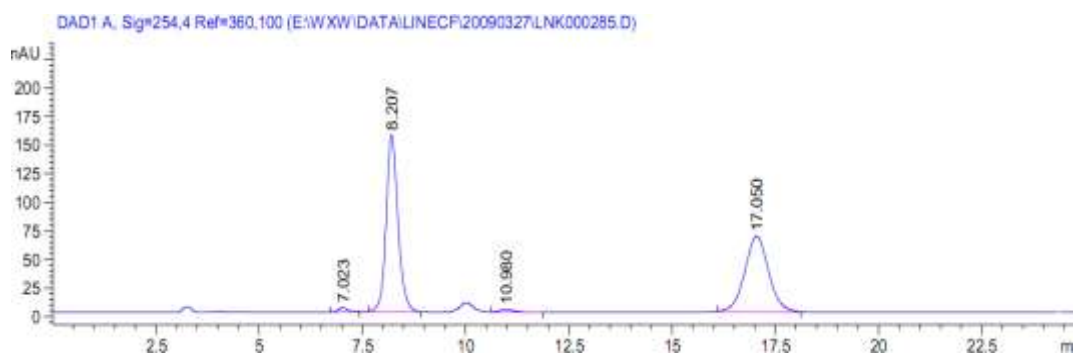

| Peak # | RetTime [min] | Type | Width [min] | Area [mAU*s] | Height [mAU] | Area %  |
|--------|---------------|------|-------------|--------------|--------------|---------|
| 1      | 7.023         | BB   | 0.2343      | 58.46277     | 3.78347      | 0.9908  |
| 2      | 8.207         | BB   | 0.3029      | 3097.85278   | 155.17172    | 52.5001 |
| 3      | 10.980        | BB   | 0.3592      | 59.34491     | 2.53461      | 1.0057  |
| 4      | 17.050        | BB   | 0.6185      | 2685.00586   | 66.29771     | 45.5034 |

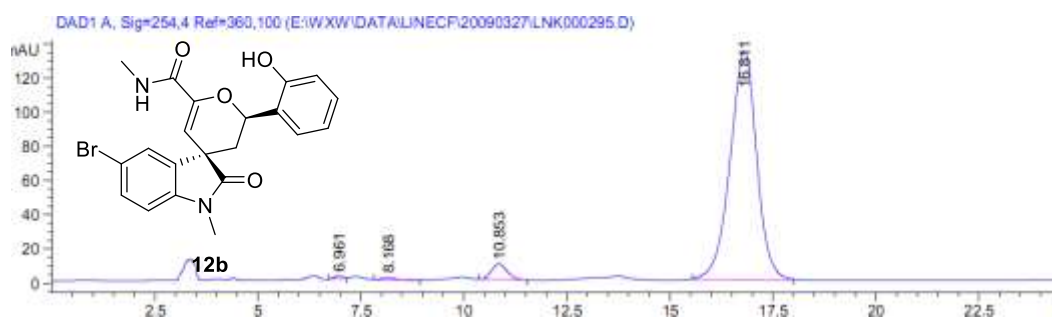

| Peak # | RetTime [min] | Type | Width [min] | Area [mAU*s] | Height [mAU] | Area %  |
|--------|---------------|------|-------------|--------------|--------------|---------|
| 1      | 6.961         | MM R | 0.2419      | 23.40681     | 1.61266      | 0.3714  |
| 2      | 8.168         | VB   | 0.3385      | 31.66816     | 1.41829      | 0.5025  |
| 3      | 10.853        | BB   | 0.4146      | 242.51257    | 9.10797      | 3.8480  |
| 4      | 16.811        | BB   | 0.6873      | 6004.71582   | 133.35417    | 95.2781 |

**(*S,E*)-3-(3-(2-Hydroxystyryl)-1-methyl-2-oxindolin-3-yl)-N-methyl-2-oxopropan amide 13**

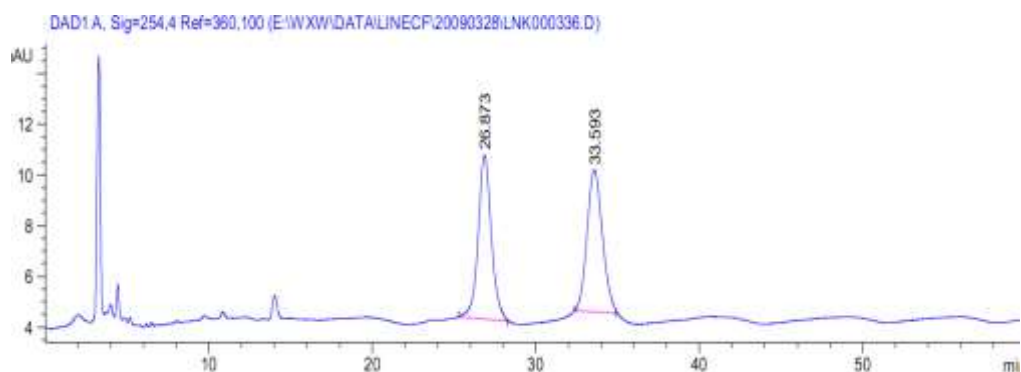

| Peak # | RetTime [min] | Type | Width [min] | Area [mAU*s] | Height [mAU] | Area %  |
|--------|---------------|------|-------------|--------------|--------------|---------|
| 1      | 26.873        | MM R | 0.9370      | 364.00021    | 6.47490      | 49.9536 |
| 2      | 33.593        | MM R | 1.0849      | 364.67700    | 5.60233      | 50.0464 |

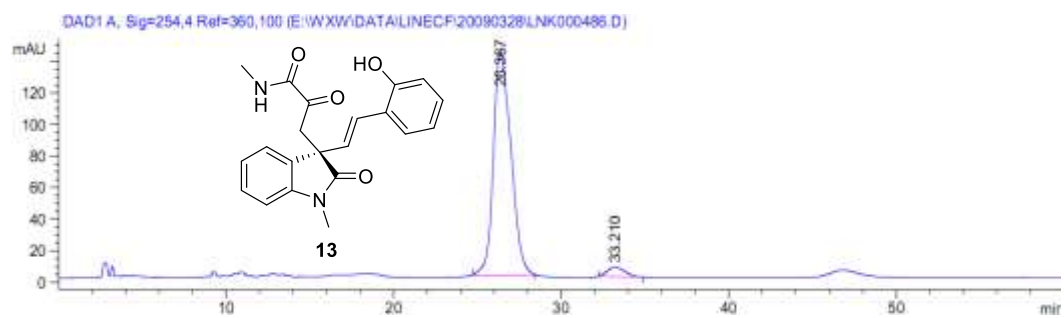

| Peak # | RetTime [min] | Type | Width [min] | Area [mAU*s] | Height [mAU] | Area %  |
|--------|---------------|------|-------------|--------------|--------------|---------|
| 1      | 26.367        | BB   | 1.0372      | 1.02837e4    | 142.29344    | 95.8769 |
| 2      | 33.210        | BB   | 0.9135      | 442.23703    | 5.96092      | 4.1231  |
